# Supplementary material
Source: publisher figshare collection journal article supplement (https://acs.figshare.com/ndownloader/files/3940234)
Supplement: Supplementary file 1 [file 3940234]

 
data_PZ26FMI_SQ_S 
  
_audit_creation_method            SHELXL-2012 
_chemical_name_systematic 
; 
 ? 
; 
_chemical_name_common             ? 
_chemical_melting_point           ? 
_chemical_formula_moiety          'C50 H66 Cl3 Fe2 Si6' 
_chemical_formula_sum 
 'C50 H66 Cl3 Fe2 Si6' 
_chemical_formula_weight          1053.61 
  
loop_ 
 _atom_type_symbol 
 _atom_type_description 
 _atom_type_scat_dispersion_real 
 _atom_type_scat_dispersion_imag 
 _atom_type_scat_source 
 'C'  'C'   0.0181   0.0091 
 'International Tables Vol C Tables 4.2.6.8 and 6.1.1.4' 
 'H'  'H'   0.0000   0.0000 
 'International Tables Vol C Tables 4.2.6.8 and 6.1.1.4' 
 'Si'  'Si'   0.2541   0.3302 
 'International Tables Vol C Tables 4.2.6.8 and 6.1.1.4' 
 'Fe'  'Fe'  -1.1336   3.1974 
 'International Tables Vol C Tables 4.2.6.8 and 6.1.1.4' 
 'Cl'  'Cl'   0.3639   0.7018 
 'International Tables Vol C Tables 4.2.6.8 and 6.1.1.4' 
  
_space_group_crystal_system       hexagonal 
_space_group_IT_number            176 
_space_group_name_H-M_alt         'P 63/m' 
_space_group_name_Hall            '-P 6c' 
  
_shelx_space_group_comment 
; 
The symmetry employed for this shelxl refinement is uniquely defined 
by the following loop, which should always be used as a source of 
symmetry information in preference to the above space-group names. 
They are only intended as comments. 
; 
  
loop_ 
 _space_group_symop_operation_xyz 
 'x, y, z' 
 '-y, x-y, z' 
 '-x+y, -x, z' 
 '-x, -y, z+1/2' 
 'y, -x+y, z+1/2' 
 'x-y, x, z+1/2' 
 '-x, -y, -z' 
 'y, -x+y, -z' 
 'x-y, x, -z' 
 'x, y, -z-1/2' 
 '-y, x-y, -z-1/2' 
 '-x+y, -x, -z-1/2' 
  
_cell_length_a                    13.1170(3) 
_cell_length_b                    13.1170(3) 
_cell_length_c                    27.3137(8) 
_cell_angle_alpha                 90 
_cell_angle_beta                  90 
_cell_angle_gamma                 120 
_cell_volume                      4069.9(2) 
_cell_formula_units_Z             2 
_cell_measurement_temperature     90(2) 
_cell_measurement_reflns_used     9875 
_cell_measurement_theta_min       3.89 
_cell_measurement_theta_max       68.22 
  
_exptl_crystal_description        Block 
_exptl_crystal_colour             White 
_exptl_crystal_density_meas       ? 
_exptl_crystal_density_method     ? 
_exptl_crystal_density_diffrn     0.860 
_exptl_crystal_F_000              1106 
_exptl_transmission_factor_min    ? 
_exptl_transmission_factor_max    ? 
_exptl_crystal_size_max           0.693 
_exptl_crystal_size_mid           0.544 
_exptl_crystal_size_min           0.390 
_exptl_absorpt_coefficient_mu     4.771 
_shelx_estimated_absorpt_T_min    0.137 
_shelx_estimated_absorpt_T_max    0.258 
_exptl_absorpt_correction_type    Multi-scan 
_exptl_absorpt_correction_T_min   0.1215 
_exptl_absorpt_correction_T_max   0.2548 
_exptl_absorpt_process_details    'SADABS 2012/1 (Sheldrick, 2012)' 
  
_exptl_special_details 
; 
A white block with approximate orthogonal dimensions 0.693 x 0.544 x 0.390mm3 
was placed and optically centered on the Bruker Duo(1) APEXII CCD 
diffractometer at -183�C.  The initial unit cell was indexed using a 
least-squares analysis of a random set of reflections collected from three 
series of 0.5� wide  omega-scans, 10 seconds per frame, and 30 frames per 
series that were well distributed in reciprocal space. Ten omega and phi-scan 
data frame series were collected [CuKa] with 0.5� wide scans and variable 
frame times based upon diffraction angle. The crystal to detector distance was 
4.96cm, thus providing a limited sphere of data with processing to 
2thetamax=136.49�. 
; 
  
_diffrn_ambient_temperature       90(2) 
_diffrn_radiation_wavelength      1.54178 
_diffrn_radiation_type            CuK\a 
_diffrn_source                    ? 
_diffrn_measurement_device_type   'Bruker APEX-II CCD' 
_diffrn_measurement_method        '\f and \w scans' 
_diffrn_detector_area_resol_mean  ? 
_diffrn_reflns_number             16507 
_diffrn_reflns_av_unetI/netI      0.0316 
_diffrn_reflns_av_R_equivalents   0.0509 
_diffrn_reflns_limit_h_min        -15 
_diffrn_reflns_limit_h_max        15 
_diffrn_reflns_limit_k_min        -15 
_diffrn_reflns_limit_k_max        13 
_diffrn_reflns_limit_l_min        -32 
_diffrn_reflns_limit_l_max        32 
_diffrn_reflns_theta_min          3.891 
_diffrn_reflns_theta_max          68.232 
_diffrn_reflns_theta_full         67.679 
_diffrn_measured_fraction_theta_max   0.999 
_diffrn_measured_fraction_theta_full  0.999 
_diffrn_reflns_Laue_measured_fraction_max    0.999 
_diffrn_reflns_Laue_measured_fraction_full   0.999 
_diffrn_reflns_point_group_measured_fraction_max   0.999 
_diffrn_reflns_point_group_measured_fraction_full  0.999 
_reflns_number_total              2554 
_reflns_number_gt                 2423 
_reflns_threshold_expression      'I > 2\s(I)' 
_reflns_Friedel_coverage          0.000 
_reflns_Friedel_fraction_max      . 
_reflns_Friedel_fraction_full     . 
  
_reflns_special_details 
; 
 Reflections were merged by SHELXL according to the crystal 
 class for the calculation of statistics and refinement. 
  
 Structure factors included contributions from the .fab file. 
  
 _reflns_Friedel_fraction is defined as the number of unique 
 Friedel pairs measured divided by the number that would be 
 possible theoretically, ignoring centric projections and 
 systematic absences. 
; 
  
_computing_data_collection        'Apex2 (2012.2-0) (Bruker, 2012)' 
_computing_cell_refinement        'SAINT (8.27b) (Bruker, 2012)' 
_computing_data_reduction         'SAINT (8.27b) (Bruker, 2012)' 
_computing_structure_solution     'SHELXS-97 (Sheldrick, 2008)' 
_computing_structure_refinement   'SHELXL-2012 (Sheldrick, 2012)' 
_computing_molecular_graphics     'Bruker SHELXTL' 
_computing_publication_material   'Bruker SHELXTL' 
  
_refine_special_details 
; 
Structural determination and Refinement:

All crystallographic calculations were performed on an iMac with 2.80GHz quad 
core processor and 8GB of extended memory. A total of 24937 reflections were 
collected and corrected for Lorentz and polarization effects in SAINT(1) and 
absorption using Blessing's method as incorporated into the program 
SADABS(2,3,5) with 2574 unique. The SHELXTL(4) program package was implemented 
to determine the probable space group and set up the initial files. System 
symmetry, systematic absences and intensity statistics indicated the 
centrosymmetric hexagonal space group P63/m (no. 176) or the chiral hexagonal 
space group P63 (no. 173). The structure was determined by direct methods with 
the successful location of a majority of the non-hydrogen atoms comprising the 
molecule of interest using the program XT5 in P63/m. The structure was refined 
with SHELXL-2012(6). The 24937 data collected were merged, based upon 
identical indices to 16537 data [R(int)=0.0367], and further merged during 
least-squares refinement to 2554 unique data [R(int)=0.0509]. The molecule of 
interest refined well but the solvent region behaved poorly.  Attempts were 
made to model the solvent region as Li atoms surrounded by disordered THF 
molecules that appear to form an infinite chain along the c-axis. Due to the 
interpenetrating nature of the THF molecules within this chain along the 
c-axis and in 3-fold symmetry about this axis Platon Squeeze(7-8) was used to 
remove this problematic region. Essentially, the solvent molecules were 
removed. Hydrogen atoms idealized throughout the final convergence phase. The 
final structure was refined to convergence with R(F)=4.42%, wR(F2)=10.78%, 
GOF=1.155 for all 2554 unique reflections [R(F)=4.27%, wR(F2)=10.70% for those 
2423 data with Fo > 4sigma(Fo)]. The final difference-Fourier map was 
featureless indicating that the structure is both correct and complete. An 
empirical correction for extinction was also attempted and found to be 
negative and therefore not applied.


References:

1.	Bruker (2010) APEX (Version 2010-11.3) and (2012) SAINT (Version 
8.27b). Bruker AXS Inc., Madison, Wisconsin, USA.

2.	An Empirical Correction for Absorption Anisotropy, Blessing, R. H. 
(1995). Acta Cryst., A51, 33-38.

3.	Sheldrick, G.M., SADABS (2008/1), 'Siemens Area Detector Absorption 
Correction' Universit�t G�ttingen: G�ttingen, Germany.

4.	Sheldrick, G.M., (2002). SHELXTL. Version 6.1. Bruker AXS Inc., 
Madison, Wisconsin, USA.

5.	A short history of SHELX, George M. Sheldrick, Acta Cryst. (2008). 
A64, 112-122.

6.	SHELXL-2012, George M. Sheldrick, Universit�t G�ttingen: G�ttingen, 
Germany.

7.	PLATON: Spek, A.L. (2003), J.Appl.Cryst. 36, 7-13.

8.	Spek, A.L. (2009) Acta Cryst. D65, 148-155.


; 
_refine_ls_structure_factor_coef  Fsqd 
_refine_ls_matrix_type            full 
_refine_ls_weighting_scheme       calc 
_refine_ls_weighting_details 
; 
 w=1/[\s^2^(Fo^2^)+(0.0265P)^2^+3.1745P] 
 where P=(Fo^2^+2Fc^2^)/3 
; 
_atom_sites_solution_primary      ? 
_atom_sites_solution_secondary    ? 
_atom_sites_solution_hydrogens    geom 
_refine_ls_hydrogen_treatment     constr 
_refine_ls_extinction_method      none 
_refine_ls_extinction_coef        . 
_refine_ls_number_reflns          2554 
_refine_ls_number_parameters      96 
_refine_ls_number_restraints      0 
_refine_ls_R_factor_all           0.0442 
_refine_ls_R_factor_gt            0.0427 
_refine_ls_wR_factor_ref          0.1078 
_refine_ls_wR_factor_gt           0.1070 
_refine_ls_goodness_of_fit_ref    1.155 
_refine_ls_restrained_S_all       1.155 
_refine_ls_shift/su_max           0.001 
_refine_ls_shift/su_mean          0.000 
  
loop_ 
 _atom_site_label 
 _atom_site_type_symbol 
 _atom_site_fract_x 
 _atom_site_fract_y 
 _atom_site_fract_z 
 _atom_site_U_iso_or_equiv 
 _atom_site_adp_type 
 _atom_site_occupancy 
 _atom_site_site_symmetry_order 
 _atom_site_calc_flag 
 _atom_site_refinement_flags_posn 
 _atom_site_refinement_flags_adp 
 _atom_site_refinement_flags_occupancy 
 _atom_site_disorder_assembly 
 _atom_site_disorder_group 
Fe1 Fe 0.6667 0.3333 0.69837(3) 0.0482(2) Uani 1 3 d S T P . . 
Si1 Si 0.51723(5) 0.31110(5) 0.60817(3) 0.03954(18) Uani 1 1 d . . . . . 
Cl1 Cl 0.58846(8) 0.42713(8) 0.7500 0.0517(2) Uani 1 2 d S T P . . 
C1 C 0.6667 0.3333 0.62318(15) 0.0361(8) Uani 1 3 d S T P . . 
C2 C 0.3993(2) 0.2034(2) 0.65054(11) 0.0502(6) Uani 1 1 d . . . . . 
H2A H 0.3990 0.1286 0.6501 0.075 Uiso 1 1 calc R U . . . 
H2B H 0.3224 0.1904 0.6397 0.075 Uiso 1 1 calc R U . . . 
H2C H 0.4150 0.2352 0.6839 0.075 Uiso 1 1 calc R U . . . 
C3 C 0.5090(2) 0.4496(2) 0.61477(10) 0.0460(6) Uani 1 1 d . . . . . 
H3A H 0.5314 0.4801 0.6482 0.069 Uiso 1 1 calc R U . . . 
H3B H 0.4284 0.4322 0.6082 0.069 Uiso 1 1 calc R U . . . 
H3C H 0.5630 0.5086 0.5914 0.069 Uiso 1 1 calc R U . . . 
C4 C 0.4636(2) 0.2566(2) 0.54421(10) 0.0413(5) Uani 1 1 d . . . . . 
C5 C 0.3744(2) 0.1397(2) 0.53445(11) 0.0463(6) Uani 1 1 d . . . . . 
H5 H 0.3398 0.0867 0.5611 0.056 Uiso 1 1 calc R U . . . 
C6 C 0.3360(2) 0.1001(2) 0.48778(11) 0.0514(7) Uani 1 1 d . . . . . 
H6 H 0.2761 0.0208 0.4825 0.062 Uiso 1 1 calc R U . . . 
C7 C 0.3851(3) 0.1763(3) 0.44832(11) 0.0547(7) Uani 1 1 d . . . . . 
H7 H 0.3592 0.1492 0.4160 0.066 Uiso 1 1 calc R U . . . 
C8 C 0.4722(2) 0.2922(2) 0.45642(10) 0.0495(6) Uani 1 1 d . . . . . 
H8 H 0.5059 0.3447 0.4296 0.059 Uiso 1 1 calc R U . . . 
C9 C 0.5095(2) 0.3309(2) 0.50354(10) 0.0447(6) Uani 1 1 d . . . . . 
H9 H 0.5684 0.4108 0.5086 0.054 Uiso 1 1 calc R U . . . 
  
loop_ 
 _atom_site_aniso_label 
 _atom_site_aniso_U_11 
 _atom_site_aniso_U_22 
 _atom_site_aniso_U_33 
 _atom_site_aniso_U_23 
 _atom_site_aniso_U_13 
 _atom_site_aniso_U_12 
Fe1 0.0493(3) 0.0493(3) 0.0460(4) 0.000 0.000 0.02463(14) 
Si1 0.0323(3) 0.0345(3) 0.0523(4) 0.0014(3) 0.0008(3) 0.0171(3) 
Cl1 0.0553(5) 0.0545(5) 0.0519(5) 0.000 0.000 0.0324(4) 
C1 0.0328(12) 0.0328(12) 0.043(2) 0.000 0.000 0.0164(6) 
C2 0.0380(13) 0.0485(14) 0.0626(16) 0.0032(12) 0.0030(12) 0.0206(12) 
C3 0.0380(13) 0.0414(13) 0.0633(16) -0.0015(12) -0.0004(11) 0.0232(11) 
C4 0.0347(12) 0.0383(12) 0.0558(14) 0.0007(11) -0.0017(10) 0.0219(10) 
C5 0.0395(13) 0.0369(12) 0.0640(16) 0.0016(11) -0.0057(12) 0.0203(11) 
C6 0.0519(15) 0.0408(14) 0.0662(18) -0.0043(12) -0.0088(13) 0.0268(12) 
C7 0.0638(17) 0.0561(16) 0.0586(16) -0.0095(13) -0.0126(14) 0.0407(14) 
C8 0.0539(15) 0.0495(14) 0.0545(15) 0.0069(12) 0.0014(12) 0.0331(13) 
C9 0.0397(13) 0.0398(13) 0.0595(15) 0.0015(11) -0.0023(11) 0.0236(11) 
  
_geom_special_details 
; 
 All esds (except the esd in the dihedral angle between two l.s. planes) 
 are estimated using the full covariance matrix.  The cell esds are taken 
 into account individually in the estimation of esds in distances, angles 
 and torsion angles; correlations between esds in cell parameters are only 
 used when they are defined by crystal symmetry.  An approximate (isotropic) 
 treatment of cell esds is used for estimating esds involving l.s. planes. 
; 
  
loop_ 
 _geom_bond_atom_site_label_1 
 _geom_bond_atom_site_label_2 
 _geom_bond_distance 
 _geom_bond_site_symmetry_2 
 _geom_bond_publ_flag 
Fe1 C1 2.054(4) . ? 
Fe1 Cl1 2.4119(8) . ? 
Fe1 Cl1 2.4119(8) 3_665 ? 
Fe1 Cl1 2.4119(8) 2_655 ? 
Fe1 Fe1 2.8204(15) 10_557 ? 
Si1 C1 1.8772(11) . ? 
Si1 C3 1.881(2) . ? 
Si1 C2 1.882(3) . ? 
Si1 C4 1.886(3) . ? 
Cl1 Fe1 2.4118(8) 10_557 ? 
C1 Si1 1.8772(11) 2_655 ? 
C1 Si1 1.8772(11) 3_665 ? 
C2 H2A 0.9800 . ? 
C2 H2B 0.9800 . ? 
C2 H2C 0.9800 . ? 
C3 H3A 0.9800 . ? 
C3 H3B 0.9800 . ? 
C3 H3C 0.9800 . ? 
C4 C9 1.400(4) . ? 
C4 C5 1.413(3) . ? 
C5 C6 1.374(4) . ? 
C5 H5 0.9500 . ? 
C6 C7 1.390(4) . ? 
C6 H6 0.9500 . ? 
C7 C8 1.389(4) . ? 
C7 H7 0.9500 . ? 
C8 C9 1.381(4) . ? 
C8 H8 0.9500 . ? 
C9 H9 0.9500 . ? 
  
loop_ 
 _geom_angle_atom_site_label_1 
 _geom_angle_atom_site_label_2 
 _geom_angle_atom_site_label_3 
 _geom_angle 
 _geom_angle_site_symmetry_1 
 _geom_angle_site_symmetry_3 
 _geom_angle_publ_flag 
C1 Fe1 Cl1 125.782(19) . . ? 
C1 Fe1 Cl1 125.781(19) . 3_665 ? 
Cl1 Fe1 Cl1 89.27(3) . 3_665 ? 
C1 Fe1 Cl1 125.781(19) . 2_655 ? 
Cl1 Fe1 Cl1 89.27(3) . 2_655 ? 
Cl1 Fe1 Cl1 89.27(3) 3_665 2_655 ? 
C1 Fe1 Fe1 180.0 . 10_557 ? 
Cl1 Fe1 Fe1 54.217(19) . 10_557 ? 
Cl1 Fe1 Fe1 54.219(19) 3_665 10_557 ? 
Cl1 Fe1 Fe1 54.219(19) 2_655 10_557 ? 
C1 Si1 C3 112.86(9) . . ? 
C1 Si1 C2 112.63(13) . . ? 
C3 Si1 C2 104.08(12) . . ? 
C1 Si1 C4 115.10(14) . . ? 
C3 Si1 C4 105.33(11) . . ? 
C2 Si1 C4 105.91(12) . . ? 
Fe1 Cl1 Fe1 71.56(4) 10_557 . ? 
Si1 C1 Si1 115.36(9) 2_655 3_665 ? 
Si1 C1 Si1 115.36(9) 2_655 . ? 
Si1 C1 Si1 115.36(9) 3_665 . ? 
Si1 C1 Fe1 102.63(12) 2_655 . ? 
Si1 C1 Fe1 102.63(12) 3_665 . ? 
Si1 C1 Fe1 102.62(12) . . ? 
Si1 C2 H2A 109.5 . . ? 
Si1 C2 H2B 109.5 . . ? 
H2A C2 H2B 109.5 . . ? 
Si1 C2 H2C 109.5 . . ? 
H2A C2 H2C 109.5 . . ? 
H2B C2 H2C 109.5 . . ? 
Si1 C3 H3A 109.5 . . ? 
Si1 C3 H3B 109.5 . . ? 
H3A C3 H3B 109.5 . . ? 
Si1 C3 H3C 109.5 . . ? 
H3A C3 H3C 109.5 . . ? 
H3B C3 H3C 109.5 . . ? 
C9 C4 C5 116.1(2) . . ? 
C9 C4 Si1 121.44(18) . . ? 
C5 C4 Si1 122.4(2) . . ? 
C6 C5 C4 122.3(3) . . ? 
C6 C5 H5 118.9 . . ? 
C4 C5 H5 118.9 . . ? 
C5 C6 C7 119.8(3) . . ? 
C5 C6 H6 120.1 . . ? 
C7 C6 H6 120.1 . . ? 
C8 C7 C6 119.7(3) . . ? 
C8 C7 H7 120.1 . . ? 
C6 C7 H7 120.1 . . ? 
C9 C8 C7 119.8(3) . . ? 
C9 C8 H8 120.1 . . ? 
C7 C8 H8 120.1 . . ? 
C8 C9 C4 122.2(2) . . ? 
C8 C9 H9 118.9 . . ? 
C4 C9 H9 118.9 . . ? 
  
loop_ 
 _geom_torsion_atom_site_label_1 
 _geom_torsion_atom_site_label_2 
 _geom_torsion_atom_site_label_3 
 _geom_torsion_atom_site_label_4 
 _geom_torsion 
 _geom_torsion_site_symmetry_1 
 _geom_torsion_site_symmetry_2 
 _geom_torsion_site_symmetry_3 
 _geom_torsion_site_symmetry_4 
 _geom_torsion_publ_flag 
C3 Si1 C1 Si1 -170.86(16) . . . 2_655 ? 
C2 Si1 C1 Si1 71.6(2) . . . 2_655 ? 
C4 Si1 C1 Si1 -49.9(2) . . . 2_655 ? 
C3 Si1 C1 Si1 -32.3(3) . . . 3_665 ? 
C2 Si1 C1 Si1 -149.83(18) . . . 3_665 ? 
C4 Si1 C1 Si1 88.62(18) . . . 3_665 ? 
C3 Si1 C1 Fe1 78.40(11) . . . . ? 
C2 Si1 C1 Fe1 -39.10(10) . . . . ? 
C4 Si1 C1 Fe1 -160.65(9) . . . . ? 
C1 Si1 C4 C9 -74.4(2) . . . . ? 
C3 Si1 C4 C9 50.6(2) . . . . ? 
C2 Si1 C4 C9 160.52(19) . . . . ? 
C1 Si1 C4 C5 106.42(19) . . . . ? 
C3 Si1 C4 C5 -128.6(2) . . . . ? 
C2 Si1 C4 C5 -18.7(2) . . . . ? 
C9 C4 C5 C6 1.2(3) . . . . ? 
Si1 C4 C5 C6 -179.6(2) . . . . ? 
C4 C5 C6 C7 -0.3(4) . . . . ? 
C5 C6 C7 C8 -0.4(4) . . . . ? 
C6 C7 C8 C9 0.1(4) . . . . ? 
C7 C8 C9 C4 0.8(4) . . . . ? 
C5 C4 C9 C8 -1.4(3) . . . . ? 
Si1 C4 C9 C8 179.30(19) . . . . ? 
  
_refine_diff_density_max    0.461 
_refine_diff_density_min   -0.186 
_refine_diff_density_rms    0.043 
  
_shelxl_version_number 2012-9 
  
_shelx_res_file 
; 
TITL P63m in P6(3)/m  PZ26 JCF 10JAN2013 
CELL  1.54178  13.1170  13.1170  27.3137   90.000   90.000  120.000 
ZERR    2.00   0.0003   0.0003   0.0008   0.000   0.000   0.000 
LATT 1 
SYMM -Y, X-Y, Z 
SYMM -X+Y, -X, Z 
SYMM -X, -Y, 1/2+Z 
SYMM Y, -X+Y, 1/2+Z 
SYMM X-Y, X, 1/2+Z 
SFAC C  H  Si Fe Cl 
UNIT 100  132  12  4  6 
  
OMIT -3 
OMIT  0   0   2 !   867.71       1483.43       5.54       0.165      13.66 
  
ACTA 
L.S. 19 
SHEL 999 0.83 
BOND $H 
HTAB 
WPDB -2 
CONF 
SIZE 0.390 0.544 0.693 ! WHITE BLOCK 
FMAP 2 
PLAN 20 
TEMP -183.000 
ABIN 
WGHT    0.026500    3.174500 
FVAR       0.13321 
FE1   4    0.666667    0.333333    0.698370    10.33333    0.04926    0.04926 = 
         0.04598    0.00000    0.00000    0.02463 
SI1   3    0.517234    0.311105    0.608165    11.00000    0.03228    0.03453 = 
         0.05232    0.00135    0.00083    0.01707 
CL1   5    0.588457    0.427132    0.750000    10.50000    0.05531    0.05451 = 
         0.05189    0.00000    0.00000    0.03239 
C1    1    0.666667    0.333333    0.623185    10.33333    0.03280    0.03280 = 
         0.04257    0.00000    0.00000    0.01640 
C2    1    0.399295    0.203423    0.650539    11.00000    0.03799    0.04851 = 
         0.06263    0.00319    0.00303    0.02064 
AFIX 137 
H2A   2    0.399023    0.128582    0.650052    11.00000   -1.50000 
H2B   2    0.322447    0.190422    0.639733    11.00000   -1.50000 
H2C   2    0.415010    0.235200    0.683896    11.00000   -1.50000 
AFIX   0 
C3    1    0.509025    0.449587    0.614769    11.00000    0.03796    0.04139 = 
         0.06330   -0.00153   -0.00036    0.02324 
AFIX 137 
H3A   2    0.531378    0.480074    0.648159    11.00000   -1.50000 
H3B   2    0.428438    0.432184    0.608196    11.00000   -1.50000 
H3C   2    0.562981    0.508640    0.591391    11.00000   -1.50000 
AFIX   0 
C4    1    0.463563    0.256573    0.544210    11.00000    0.03466    0.03835 = 
         0.05579    0.00066   -0.00168    0.02190 
C5    1    0.374396    0.139722    0.534453    11.00000    0.03946    0.03690 = 
         0.06405    0.00165   -0.00565    0.02027 
AFIX  43 
H5    2    0.339784    0.086741    0.561080    11.00000   -1.20000 
AFIX   0 
C6    1    0.336025    0.100081    0.487785    11.00000    0.05187    0.04085 = 
         0.06620   -0.00435   -0.00884    0.02679 
AFIX  43 
H6    2    0.276122    0.020806    0.482494    11.00000   -1.20000 
AFIX   0 
C7    1    0.385100    0.176299    0.448323    11.00000    0.06385    0.05606 = 
         0.05862   -0.00948   -0.01263    0.04073 
AFIX  43 
H7    2    0.359202    0.149213    0.415957    11.00000   -1.20000 
AFIX   0 
C8    1    0.472158    0.292219    0.456421    11.00000    0.05393    0.04952 = 
         0.05450    0.00689    0.00138    0.03306 
AFIX  43 
H8    2    0.505934    0.344743    0.429597    11.00000   -1.20000 
AFIX   0 
C9    1    0.509498    0.330940    0.503545    11.00000    0.03967    0.03983 = 
         0.05947    0.00147   -0.00228    0.02360 
AFIX  43 
H9    2    0.568358    0.410751    0.508553    11.00000   -1.20000 
AFIX   0 
HKLF 4 
  
REM  P63m in P6(3)/m  PZ26 JCF 10JAN2013 
REM R1 =  0.0427 for    2423 Fo > 4sig(Fo)  and  0.0442 for all    2554 data 
REM     96 parameters refined using      0 restraints 
  
END 
  
WGHT      0.0265      3.1745 
  
REM No hydrogen bonds found for HTAB generation 
  
REM Highest difference peak  0.461,  deepest hole -0.186,  1-sigma level  0.043 
Q1    1   0.6667  0.3333  0.6624  10.33333  0.05    0.46 
Q2    1   0.5122  0.2937  0.5723  11.00000  0.05    0.43 
Q3    1   0.6667  0.3333  0.7344  10.33333  0.05    0.36 
Q4    1   0.4742  0.2654  0.6413  11.00000  0.05    0.26 
Q5    1   0.5923  0.4269  0.7849  11.00000  0.05    0.24 
Q6    1   0.6815  0.2847  0.6305  11.00000  0.05    0.23 
Q7    1   0.6667  0.3333  0.5989  10.33333  0.05    0.18 
Q8    1   0.6761  0.4163  0.7629  11.00000  0.05    0.17 
Q9    1   0.3799  0.1756  0.3949  11.00000  0.05    0.16 
Q10   1   0.6667  0.3333  0.3491  10.33333  0.05    0.15 
Q11   1   0.5753  0.5326  0.7500  10.50000  0.05    0.15 
Q12   1   0.2682  0.1743  0.4852  11.00000  0.05    0.15 
Q13   1   0.3588  0.1310  0.4707  11.00000  0.05    0.14 
Q14   1   0.5371  0.4167  0.6084  11.00000  0.05    0.14 
Q15   1   0.4096  0.1402  0.6682  11.00000  0.05    0.14 
Q16   1   0.5007  0.2797  0.5283  11.00000  0.05    0.13 
Q17   1   0.4258  0.1992  0.5387  11.00000  0.05    0.13 
Q18   1   0.4251  0.4376  0.6315  11.00000  0.05    0.13 
Q19   1   0.4836  0.2994  0.4098  11.00000  0.05    0.13 
Q20   1   0.3626  0.1390  0.5076  11.00000  0.05    0.12 
; 
_shelx_res_checksum   93114 
  
_shelx_hkl_file 
; 
   0  -3 -32    0.04    0.08 
   1  -3 -32    0.24    0.08 
   2  -3 -32    2.05    0.17 
   3  -3 -32   -0.01    0.14 
  -1  -2 -32    2.36    0.18 
   0  -2 -32    1.54    0.15 
   1  -2 -32    0.55    0.09 
   2  -2 -32    1.59    0.28 
   3  -2 -32    0.03    0.14 
  -2  -1 -32    0.30    0.10 
  -1  -1 -32    0.52    0.09 
   0  -1 -32    0.48    0.17 
   1  -1 -32    0.46    0.17 
   2  -1 -32    0.47    0.17 
   3  -1 -32    2.23    0.30 
  -1   0 -32    0.54    0.17 
   0   0 -32    3.91    0.43 
   1   0 -32    0.51    0.17 
   2   0 -32    1.23    0.26 
   3   0 -32    0.08    0.13 
   0   1 -32    0.44    0.16 
   1   1 -32    0.42    0.16 
   2   1 -32    0.14    0.14 
   0   2 -32    1.45    0.25 
   1   2 -32    2.12    0.29 
   1  -5 -31   -0.04    0.14 
   2  -5 -31    0.23    0.08 
   3  -5 -31    2.21    0.17 
   4  -5 -31    4.65    0.48 
  -1  -4 -31    4.76    0.49 
   0  -4 -31    3.76    0.23 
   1  -4 -31    0.27    0.09 
   2  -4 -31    2.32    0.19 
   3  -4 -31    0.77    0.10 
   4  -4 -31    3.25    0.21 
   5  -4 -31   -0.03    0.12 
  -2  -3 -31    2.67    0.19 
  -1  -3 -31    0.42    0.10 
   0  -3 -31    3.09    0.22 
   1  -3 -31    0.92    0.12 
   2  -3 -31    3.11    0.21 
   3  -3 -31    2.67    0.20 
   4  -3 -31    0.18    0.15 
   5  -3 -31    0.07    0.13 
  -3  -2 -31    0.11    0.11 
  -2  -2 -31    2.34    0.19 
  -1  -2 -31    2.99    0.22 
   0  -2 -31    0.78    0.11 
   1  -2 -31    0.14    0.10 
   2  -2 -31    0.68    0.21 
   3  -2 -31    1.28    0.28 
   4  -2 -31    2.11    0.32 
   5  -2 -31    2.22    0.31 
  -4  -1 -31   -0.01    0.10 
  -3  -1 -31    0.05    0.11 
  -2  -1 -31    0.86    0.14 
  -1  -1 -31    0.03    0.10 
   0  -1 -31    2.28    0.20 
   1  -1 -31    2.72    0.37 
   2  -1 -31    0.23    0.18 
   3  -1 -31    3.18    0.39 
   4  -1 -31    0.75    0.17 
   5  -1 -31    4.96    0.47 
  -4   0 -31    3.17    0.28 
  -3   0 -31    3.34    0.27 
  -2   0 -31    0.68    0.14 
  -1   0 -31    2.46    0.37 
   0   0 -31   -0.14    0.17 
   1   0 -31    2.89    0.38 
   2   0 -31    0.82    0.21 
   3   0 -31    3.00    0.38 
   4   0 -31    3.40    0.39 
   0   1 -31    2.04    0.36 
   1   1 -31    0.12    0.17 
   2   1 -31    1.03    0.21 
   3   1 -31    0.33    0.16 
   4   1 -31    0.00    0.13 
   0   2 -31    0.70    0.19 
   1   2 -31    2.80    0.38 
   2   2 -31    2.30    0.33 
   3   2 -31    0.32    0.14 
   1   3 -31    0.45    0.16 
   2   3 -31    2.59    0.31 
   1  -6 -30    0.27    0.08 
   2  -6 -30    0.00    0.08 
   3  -6 -30    0.30    0.09 
   4  -6 -30    1.22    0.14 
   5  -6 -30    0.21    0.07 
  -1  -5 -30    0.37    0.09 
   0  -5 -30    4.93    0.29 
   1  -5 -30    2.68    0.21 
   2  -5 -30    0.12    0.09 
   3  -5 -30    0.39    0.10 
   4  -5 -30    4.28    0.27 
   5  -5 -30    5.10    0.28 
   6  -5 -30    0.34    0.13 
  -2  -4 -30    0.97    0.11 
  -1  -4 -30    4.88    0.28 
   0  -4 -30    0.14    0.11 
   1  -4 -30    2.39    0.22 
   2  -4 -30    0.78    0.12 
   3  -4 -30    3.20    0.23 
   4  -4 -30    0.20    0.09 
   5  -4 -30    3.05    0.19 
   6  -4 -30    0.00    0.12 
  -3  -3 -30    0.14    0.11 
  -2  -3 -30    0.22    0.10 
  -1  -3 -30    3.24    0.24 
   0  -3 -30    6.73    0.39 
   1  -3 -30    1.61    0.17 
   2  -3 -30    0.98    0.13 
   3  -3 -30    6.87    0.38 
   4  -3 -30    2.46    0.37 
   5  -3 -30    0.02    0.16 
   6  -3 -30    0.10    0.13 
  -4  -2 -30   -0.03    0.11 
  -3  -2 -30    0.12    0.12 
  -2  -2 -30    0.88    0.13 
  -1  -2 -30    1.35    0.14 
   0  -2 -30    1.07    0.14 
   1  -2 -30    1.84    0.20 
   2  -2 -30    1.36    0.14 
   3  -2 -30    1.95    0.36 
   4  -2 -30    1.28    0.23 
   5  -2 -30    0.35    0.17 
   6  -2 -30    1.09    0.23 
  -4  -1 -30    2.50    0.26 
  -3  -1 -30    2.70    0.27 
  -2  -1 -30    1.20    0.15 
  -1  -1 -30    1.88    0.20 
   0  -1 -30    0.14    0.11 
   1  -1 -30    0.15    0.21 
   2  -1 -30    1.85    0.38 
   3  -1 -30    0.88    0.24 
   4  -1 -30    3.32    0.42 
   5  -1 -30    3.82    0.47 
   6  -1 -30    0.08    0.12 
  -4   0 -30    0.06    0.13 
  -3   0 -30    6.35    0.46 
  -2   0 -30    1.56    0.23 
  -1   0 -30    0.10    0.20 
   0   0 -30    5.73    0.62 
   1   0 -30    0.09    0.20 
   2   0 -30    1.53    0.27 
   3   0 -30    6.56    0.67 
   4   0 -30   -0.02    0.16 
   5   0 -30    4.84    0.49 
  -4   1 -30    3.46    0.29 
  -1   1 -30    0.18    0.19 
   0   1 -30    0.06    0.20 
   1   1 -30    1.61    0.38 
   2   1 -30    1.13    0.26 
   3   1 -30    2.63    0.38 
   4   1 -30    2.31    0.35 
   5   1 -30    0.15    0.13 
   0   2 -30    1.13    0.25 
   1   2 -30    1.55    0.33 
   2   2 -30    1.22    0.23 
   3   2 -30    0.01    0.16 
   4   2 -30   -0.10    0.13 
   0   3 -30    6.56    0.66 
   1   3 -30    3.25    0.41 
   2   3 -30    0.30    0.17 
   3   3 -30    0.21    0.14 
   1   4 -30    4.38    0.46 
   2   4 -30    1.12    0.24 
   2  -7 -29    0.10    0.08 
   3  -7 -29    0.14    0.08 
   4  -7 -29    0.40    0.09 
   5  -7 -29    0.10    0.08 
   0  -6 -29    0.05    0.09 
   1  -6 -29    1.92    0.18 
   2  -6 -29    0.28    0.10 
   3  -6 -29    2.92    0.22 
   4  -6 -29    3.71    0.26 
   5  -6 -29    4.13    0.24 
   6  -6 -29   -0.13    0.07 
  -2  -5 -29    0.18    0.09 
  -1  -5 -29    3.45    0.24 
   0  -5 -29    4.26    0.27 
   1  -5 -29    0.73    0.12 
   2  -5 -29    6.46    0.38 
   3  -5 -29    1.17    0.13 
   4  -5 -29   -0.03    0.10 
   5  -5 -29    4.06    0.26 
   6  -5 -29    1.92    0.16 
  -3  -4 -29    0.48    0.10 
  -2  -4 -29    4.70    0.27 
  -1  -4 -29    0.19    0.11 
   0  -4 -29   13.67    0.72 
   1  -4 -29    6.35    0.37 
   2  -4 -29    2.53    0.25 
   3  -4 -29   13.60    0.72 
   4  -4 -29   14.26    0.71 
   5  -4 -29    0.70    0.11 
   6  -4 -29    0.18    0.15 
   7  -4 -29    0.13    0.12 
  -4  -3 -29    0.07    0.11 
  -3  -3 -29    3.01    0.23 
  -2  -3 -29    0.85    0.13 
  -1  -3 -29   14.26    0.73 
   0  -3 -29    0.06    0.12 
   1  -3 -29    9.84    0.56 
   2  -3 -29    6.90    0.39 
   3  -3 -29    0.17    0.12 
   4  -3 -29    6.41    0.35 
   5  -3 -29    6.48    0.65 
   6  -3 -29    2.43    0.37 
   7  -3 -29    0.32    0.13 
  -4  -2 -29    0.34    0.13 
  -3  -2 -29    6.61    0.47 
  -2  -2 -29    3.35    0.25 
  -1  -2 -29    5.75    0.39 
   0  -2 -29    1.18    0.15 
   1  -2 -29    0.65    0.14 
   2  -2 -29    1.30    0.15 
   3  -2 -29   11.00    0.99 
   4  -2 -29    2.06    0.44 
   5  -2 -29    1.31    0.24 
   6  -2 -29    3.83    0.45 
   7  -2 -29    0.17    0.12 
  -5  -1 -29    1.85    0.23 
  -4  -1 -29    1.19    0.17 
  -3  -1 -29    5.52    0.45 
  -2  -1 -29   10.37    0.56 
  -1  -1 -29    0.99    0.14 
   0  -1 -29    2.45    0.25 
   1  -1 -29    3.09    0.47 
   2  -1 -29    0.30    0.25 
   3  -1 -29    7.24    0.70 
   4  -1 -29   14.68    1.25 
   5  -1 -29    0.13    0.18 
   6  -1 -29    3.53    0.41 
  -5   0 -29    3.49    0.33 
  -4   0 -29   13.41    0.89 
  -3   0 -29    0.51    0.16 
  -2   0 -29    1.18    0.18 
  -1   0 -29    2.49    0.25 
   0   0 -29   -0.07    0.21 
   1   0 -29    3.22    0.48 
   2   0 -29    1.04    0.28 
   3   0 -29    0.21    0.23 
   4   0 -29   13.97    1.24 
   5   0 -29    3.68    0.46 
   6   0 -29    0.07    0.14 
  -5   1 -29    0.00    0.14 
  -4   1 -29   13.13    0.89 
  -3   1 -29    7.16    0.48 
  -1   1 -29    2.82    0.45 
   0   1 -29    3.11    0.46 
   1   1 -29    0.74    0.25 
   2   1 -29   10.78    0.99 
   3   1 -29    5.03    0.63 
   4   1 -29    1.01    0.22 
   5   1 -29    2.01    0.31 
   0   2 -29    0.97    0.26 
   1   2 -29    5.88    0.68 
   2   2 -29    3.25    0.44 
   3   2 -29    6.65    0.66 
   4   2 -29    0.25    0.17 
   5   2 -29   -0.01    0.13 
   0   3 -29    0.21    0.21 
   1   3 -29   13.37    1.24 
   2   3 -29    0.95    0.23 
   3   3 -29    3.04    0.38 
   4   3 -29    0.28    0.14 
   1   4 -29    0.23    0.18 
   2   4 -29    4.16    0.45 
   3   4 -29    0.66    0.16 
   1   5 -29    3.27    0.40 
   2   5 -29    0.18    0.13 
   2  -8 -28    0.29    0.16 
   3  -8 -28    0.23    0.08 
   4  -8 -28    0.55    0.09 
   5  -8 -28    5.90    0.31 
   0  -7 -28    0.94    0.11 
   1  -7 -28    1.64    0.16 
   2  -7 -28    1.73    0.17 
   3  -7 -28    0.05    0.10 
   4  -7 -28    0.27    0.10 
   5  -7 -28    3.66    0.24 
   6  -7 -28    0.33    0.11 
   7  -7 -28    0.77    0.11 
  -1  -6 -28    0.06    0.09 
   0  -6 -28    0.29    0.10 
   1  -6 -28   -0.03    0.10 
   2  -6 -28    4.74    0.29 
   3  -6 -28    5.12    0.32 
   4  -6 -28    0.44    0.12 
   5  -6 -28    2.99    0.24 
   6  -6 -28    0.14    0.09 
   7  -6 -28    1.46    0.17 
  -3  -5 -28    5.51    0.32 
  -2  -5 -28    4.05    0.25 
  -1  -5 -28    3.72    0.24 
   0  -5 -28    0.84    0.14 
   1  -5 -28    6.82    0.40 
   2  -5 -28    0.21    0.13 
   3  -5 -28   17.99    0.74 
   4  -5 -28   12.47    0.64 
   5  -5 -28    1.32    0.16 
   6  -5 -28    0.03    0.09 
   7  -5 -28    1.44    0.18 
  -4  -4 -28    0.62    0.12 
  -3  -4 -28    0.39    0.11 
  -2  -4 -28    0.38    0.12 
  -1  -4 -28   12.28    0.64 
   0  -4 -28    4.37    0.29 
   1  -4 -28   18.26    0.93 
   2  -4 -28   19.56    0.97 
   3  -4 -28    2.09    0.18 
   4  -4 -28    3.77    0.22 
   5  -4 -28    6.42    0.38 
   6  -4 -28    4.21    0.27 
   7  -4 -28   -0.04    0.14 
  -4  -3 -28    0.01    0.13 
  -3  -3 -28    4.56    0.31 
  -2  -3 -28   19.61    0.94 
  -1  -3 -28    1.49    0.21 
   0  -3 -28   15.49    0.79 
   1  -3 -28    0.21    0.14 
   2  -3 -28    9.52    0.54 
   3  -3 -28   14.91    0.62 
   4  -3 -28   17.64    0.73 
   5  -3 -28    0.17    0.22 
   6  -3 -28    4.10    0.52 
   7  -3 -28    0.32    0.15 
  -5  -2 -28    1.90    0.23 
  -4  -2 -28    3.78    0.35 
  -3  -2 -28    0.38    0.16 
  -2  -2 -28   18.79    0.97 
  -1  -2 -28   10.07    0.54 
   0  -2 -28    1.85    0.19 
   1  -2 -28    0.28    0.14 
   2  -2 -28    1.67    0.18 
   3  -2 -28    0.31    0.27 
   4  -2 -28   19.83    1.69 
   5  -2 -28   18.23    1.62 
   6  -2 -28    0.61    0.20 
   7  -2 -28    3.16    0.40 
  -5  -1 -28    0.01    0.14 
  -4  -1 -28    6.05    0.49 
  -3  -1 -28   18.24    1.14 
  -2  -1 -28    0.17    0.13 
  -1  -1 -28    0.14    0.13 
   0  -1 -28    1.29    0.16 
   1  -1 -28    1.01    0.16 
   2  -1 -28    0.37    0.27 
   3  -1 -28    9.61    0.95 
   4  -1 -28    2.50    0.42 
   5  -1 -28   12.60    1.11 
   6  -1 -28    2.56    0.41 
   7  -1 -28    0.27    0.14 
  -5   0 -28    1.38    0.19 
  -4   0 -28    2.76    0.35 
  -3   0 -28   13.87    0.97 
  -2   0 -28    2.03    0.24 
  -1   0 -28    0.96    0.16 
   0   0 -28   19.91    1.71 
   1   0 -28    1.03    0.30 
   2   0 -28    2.24    0.47 
   3   0 -28   15.78    1.38 
   4   0 -28    3.26    0.50 
   5   0 -28    1.60    0.34 
   6   0 -28    0.27    0.17 
   7   0 -28    0.27    0.14 
  -5   1 -28   10.95    0.79 
  -4   1 -28    1.91    0.28 
  -3   1 -28    8.96    0.65 
  -1   1 -28    1.13    0.29 
   0   1 -28    1.36    0.30 
   1   1 -28    0.41    0.25 
   2   1 -28    0.18    0.24 
   3   1 -28   19.73    1.61 
   4   1 -28    7.02    0.69 
   5   1 -28   -0.06    0.17 
   6   1 -28    1.30    0.27 
  -5   2 -28   16.86    1.15 
  -1   2 -28    0.34    0.25 
   0   2 -28    1.93    0.44 
   1   2 -28    9.32    0.93 
   2   2 -28   18.77    1.68 
   3   2 -28    0.40    0.22 
   4   2 -28    4.27    0.50 
   5   2 -28    1.75    0.31 
   6   2 -28    0.30    0.13 
   0   3 -28   15.60    1.37 
   1   3 -28    1.38    0.30 
   2   3 -28   19.29    1.62 
   3   3 -28    5.20    0.53 
   4   3 -28    0.01    0.16 
   5   3 -28    0.36    0.14 
   0   4 -28    4.26    0.50 
   1   4 -28   12.03    1.10 
   2   4 -28    0.15    0.18 
   3   4 -28    0.40    0.17 
   4   4 -28    0.46    0.15 
   1   5 -28    3.50    0.42 
   2   5 -28    3.73    0.41 
   3   5 -28    5.49    0.54 
   4  -9 -27    0.22    0.08 
   5  -9 -27    1.65    0.17 
   1  -8 -27    0.74    0.09 
   2  -8 -27    0.20    0.08 
   3  -8 -27    0.25    0.10 
   4  -8 -27    0.11    0.09 
   5  -8 -27    0.05    0.09 
   6  -8 -27    1.23    0.17 
   7  -8 -27    0.82    0.11 
  -1  -7 -27    1.07    0.12 
   0  -7 -27    0.26    0.09 
   1  -7 -27    0.28    0.10 
   2  -7 -27   -0.01    0.10 
   3  -7 -27    0.13    0.11 
   4  -7 -27    1.27    0.14 
   5  -7 -27    0.32    0.11 
   6  -7 -27    5.17    0.35 
   7  -7 -27    0.36    0.11 
   8  -7 -27    0.56    0.10 
  -2  -6 -27    0.74    0.11 
  -1  -6 -27    4.78    0.29 
   0  -6 -27    0.99    0.13 
   1  -6 -27    0.34    0.12 
   2  -6 -27    0.68    0.13 
   3  -6 -27    0.12    0.10 
   4  -6 -27    5.98    0.29 
   5  -6 -27    1.99    0.20 
   6  -6 -27    0.91    0.12 
   7  -6 -27    0.27    0.11 
   8  -6 -27    0.17    0.09 
  -3  -5 -27    0.14    0.09 
  -2  -5 -27    0.51    0.11 
  -1  -5 -27    1.55    0.19 
   0  -5 -27    3.72    0.26 
   1  -5 -27    4.41    0.34 
   2  -5 -27   11.54    0.47 
   3  -5 -27    7.39    0.32 
   4  -5 -27    0.04    0.10 
   5  -5 -27    3.01    0.19 
   6  -5 -27    0.31    0.11 
   7  -5 -27    0.02    0.11 
   8  -5 -27    0.15    0.09 
  -4  -4 -27    0.24    0.12 
  -3  -4 -27    1.04    0.14 
  -2  -4 -27    6.11    0.37 
  -1  -4 -27    0.09    0.13 
   0  -4 -27   13.36    0.71 
   1  -4 -27    4.66    0.32 
   2  -4 -27    0.52    0.12 
   3  -4 -27    3.52    0.24 
   4  -4 -27   12.41    0.55 
   5  -4 -27    4.68    0.25 
   6  -4 -27    0.29    0.11 
   7  -4 -27    0.13    0.17 
  -5  -3 -27    0.34    0.13 
  -4  -3 -27    0.00    0.14 
  -3  -3 -27   -0.01    0.12 
  -2  -3 -27    6.18    0.41 
  -1  -3 -27    4.69    0.31 
   0  -3 -27    0.59    0.15 
   1  -3 -27    5.20    0.37 
   2  -3 -27    3.69    0.24 
   3  -3 -27    0.64    0.12 
   4  -3 -27    3.58    0.23 
   5  -3 -27   10.62    1.04 
   6  -3 -27   -0.03    0.21 
   7  -3 -27    1.43    0.31 
  -5  -2 -27   -0.09    0.14 
  -4  -2 -27    0.29    0.16 
  -3  -2 -27   10.45    0.59 
  -2  -2 -27    0.92    0.16 
  -1  -2 -27    4.05    0.31 
   0  -2 -27    3.71    0.30 
   1  -2 -27   -0.01    0.14 
   2  -2 -27    2.69    0.22 
   3  -2 -27    5.15    0.28 
   4  -2 -27    0.50    0.28 
   5  -2 -27    7.41    0.72 
   6  -2 -27    5.66    0.63 
   7  -2 -27    0.42    0.18 
   8  -2 -27    0.81    0.16 
  -6  -1 -27    0.10    0.14 
  -5  -1 -27    0.18    0.16 
  -4  -1 -27    4.90    0.42 
  -3  -1 -27    2.89    0.37 
  -2  -1 -27    5.54    0.37 
  -1  -1 -27    0.30    0.14 
   0  -1 -27    0.49    0.15 
   1  -1 -27    0.32    0.15 
   2  -1 -27    0.25    0.27 
   3  -1 -27    3.37    0.57 
   4  -1 -27    3.28    0.55 
   5  -1 -27    0.24    0.23 
   6  -1 -27    2.22    0.35 
   7  -1 -27    4.18    0.49 
   8  -1 -27    0.50    0.14 
  -6   0 -27    0.44    0.17 
  -5   0 -27    2.37    0.33 
  -4   0 -27   13.17    0.87 
  -3   0 -27    0.91    0.19 
  -2   0 -27    3.31    0.29 
  -1   0 -27    0.74    0.15 
   0   0 -27    0.06    0.27 
   1   0 -27    0.71    0.29 
   2   0 -27    3.04    0.54 
   3   0 -27    0.60    0.28 
   4   0 -27   13.21    1.22 
   5   0 -27    2.34    0.45 
   6   0 -27    0.29    0.20 
   7   0 -27    0.74    0.17 
  -6   1 -27    1.83    0.27 
  -5   1 -27    0.28    0.17 
  -4   1 -27    3.15    0.38 
  -3   1 -27    3.02    0.37 
  -1   1 -27    0.34    0.27 
   0   1 -27    0.38    0.28 
   1   1 -27    0.42    0.26 
   2   1 -27    5.02    0.67 
   3   1 -27    3.64    0.54 
   4   1 -27    5.62    0.58 
   5   1 -27    0.29    0.20 
   6   1 -27    0.05    0.16 
   7   1 -27    0.29    0.14 
  -5   2 -27    6.16    0.50 
  -4   2 -27    0.43    0.19 
  -1   2 -27    0.38    0.27 
   0   2 -27    3.55    0.54 
   1   2 -27    3.55    0.55 
   2   2 -27    0.89    0.27 
   3   2 -27   11.62    1.04 
   4   2 -27    0.35    0.23 
   5   2 -27    0.14    0.18 
   6   2 -27    0.21    0.15 
   0   3 -27    0.72    0.27 
   1   3 -27    4.58    0.54 
   2   3 -27    5.59    0.70 
   3   3 -27    0.21    0.23 
   4   3 -27    0.13    0.20 
   5   3 -27    0.18    0.16 
   0   4 -27   13.47    1.21 
   1   4 -27    0.32    0.23 
   2   4 -27    6.38    0.65 
   3   4 -27    0.83    0.24 
   4   4 -27    0.11    0.17 
   5   4 -27    0.27    0.13 
   1   5 -27    1.22    0.27 
   2   5 -27    0.42    0.20 
   3   5 -27    0.04    0.16 
   4   5 -27    1.81    0.26 
   1   6 -27    4.83    0.50 
   2   6 -27    0.77    0.18 
   2  -9 -26    0.41    0.17 
   3  -9 -26    0.13    0.08 
   4  -9 -26    0.37    0.09 
   5  -9 -26    0.33    0.11 
   6  -9 -26    0.39    0.11 
   7  -9 -26    0.12    0.09 
   0  -8 -26    0.26    0.18 
   1  -8 -26    8.53    0.48 
   2  -8 -26    1.42    0.16 
   3  -8 -26   -0.02    0.10 
   4  -8 -26    2.23    0.21 
   5  -8 -26    2.58    0.21 
   6  -8 -26    4.34    0.31 
   7  -8 -26    4.17    0.30 
   8  -8 -26    0.37    0.10 
  -2  -7 -26    0.01    0.16 
  -1  -7 -26    3.23    0.24 
   0  -7 -26    8.72    0.45 
   1  -7 -26    2.05    0.22 
   2  -7 -26    1.83    0.19 
   3  -7 -26    0.04    0.09 
   4  -7 -26    0.01    0.09 
   5  -7 -26    0.43    0.10 
   6  -7 -26    0.48    0.15 
   7  -7 -26    8.94    0.55 
   8  -7 -26    8.88    0.58 
   9  -7 -26    0.53    0.10 
  -3  -6 -26    0.25    0.09 
  -2  -6 -26    3.86    0.26 
  -1  -6 -26    0.67    0.12 
   0  -6 -26    9.23    0.50 
   1  -6 -26    1.72    0.20 
   2  -6 -26    0.07    0.10 
   3  -6 -26    0.16    0.11 
   4  -6 -26    1.56    0.14 
   5  -6 -26    0.27    0.10 
   6  -6 -26    8.62    0.39 
   7  -6 -26    2.31    0.26 
   8  -6 -26    1.34    0.18 
   9  -6 -26    0.10    0.08 
  -4  -5 -26    0.37    0.09 
  -3  -5 -26    2.36    0.21 
  -2  -5 -26    0.60    0.13 
  -1  -5 -26    0.42    0.13 
   0  -5 -26    4.80    0.34 
   1  -5 -26    3.49    0.29 
   2  -5 -26    4.41    0.26 
   3  -5 -26    3.35    0.23 
   4  -5 -26    2.67    0.21 
   5  -5 -26    4.32    0.26 
   6  -5 -26    1.09    0.11 
   7  -5 -26    1.93    0.23 
   8  -5 -26    0.05    0.10 
  -4  -4 -26    2.62    0.21 
  -3  -4 -26   -0.01    0.12 
  -2  -4 -26    1.56    0.17 
  -1  -4 -26    3.54    0.28 
   0  -4 -26    3.62    0.32 
   1  -4 -26    1.50    0.15 
   2  -4 -26    3.60    0.24 
   3  -4 -26   17.58    0.72 
   4  -4 -26    4.01    0.25 
   5  -4 -26    2.71    0.21 
   6  -4 -26    0.20    0.09 
   7  -4 -26    0.04    0.19 
  -5  -3 -26   -0.01    0.13 
  -4  -3 -26    0.00    0.15 
  -3  -3 -26    0.20    0.13 
  -2  -3 -26    3.25    0.29 
  -1  -3 -26   17.18    0.91 
   0  -3 -26    0.94    0.16 
   1  -3 -26    0.37    0.12 
   2  -3 -26    6.33    0.32 
   3  -3 -26    0.70    0.13 
   4  -3 -26    1.08    0.13 
   5  -3 -26    4.24    0.24 
   6  -3 -26    0.32    0.24 
   7  -3 -26   -0.07    0.18 
  -5  -2 -26    1.51    0.21 
  -4  -2 -26    0.14    0.17 
  -3  -2 -26    3.76    0.32 
  -2  -2 -26    3.67    0.30 
  -1  -2 -26    5.74    0.41 
   0  -2 -26    1.62    0.19 
   1  -2 -26    3.83    0.25 
   2  -2 -26    1.78    0.15 
   3  -2 -26    0.37    0.11 
   4  -2 -26    3.00    0.56 
   5  -2 -26    3.90    0.53 
   6  -2 -26    1.58    0.29 
   7  -2 -26    0.16    0.19 
   8  -2 -26    3.52    0.42 
  -6  -1 -26    3.57    0.31 
  -5  -1 -26    1.07    0.20 
  -4  -1 -26    2.68    0.35 
  -3  -1 -26    1.20    0.21 
  -2  -1 -26    0.36    0.15 
  -1  -1 -26    3.41    0.32 
   0  -1 -26    0.69    0.17 
   1  -1 -26    1.03    0.17 
   2  -1 -26    3.29    0.32 
   3  -1 -26    6.86    0.75 
   4  -1 -26   18.58    1.58 
   5  -1 -26    2.62    0.49 
   6  -1 -26    0.07    0.21 
   7  -1 -26    0.47    0.19 
   8  -1 -26    4.01    0.41 
  -6   0 -26    9.67    0.63 
  -5   0 -26    5.03    0.43 
  -4   0 -26    3.91    0.40 
  -3   0 -26    0.54    0.19 
  -2   0 -26    1.12    0.18 
  -1   0 -26    1.44    0.18 
   0   0 -26   23.37    2.02 
   1   0 -26    1.75    0.34 
   2   0 -26    1.00    0.33 
   3   0 -26    0.77    0.29 
   4   0 -26    4.28    0.56 
   5   0 -26    4.60    0.58 
   6   0 -26    8.33    0.85 
   7   0 -26    6.77    0.77 
   8   0 -26    0.41    0.13 
  -6   1 -26    0.13    0.17 
  -5   1 -26    2.55    0.34 
  -4   1 -26   16.89    1.12 
  -3   1 -26    6.39    0.50 
  -2   1 -26    2.72    0.37 
  -1   1 -26    1.02    0.31 
   0   1 -26    1.16    0.32 
   1   1 -26    3.73    0.58 
   2   1 -26    0.55    0.28 
   3   1 -26    1.12    0.32 
   4   1 -26    3.06    0.52 
   5   1 -26    0.54    0.26 
   6   1 -26    3.15    0.41 
   7   1 -26    9.29    0.83 
  -6   2 -26    1.18    0.22 
  -5   2 -26    3.44    0.36 
  -4   2 -26    2.52    0.36 
  -1   2 -26    4.70    0.59 
   0   2 -26    1.79    0.35 
   1   2 -26    5.68    0.72 
   2   2 -26    3.62    0.56 
   3   2 -26    4.03    0.59 
   4   2 -26    0.02    0.24 
   5   2 -26    1.33    0.28 
   6   2 -26    1.10    0.23 
   7   2 -26    0.62    0.15 
   0   3 -26    0.95    0.28 
   1   3 -26   16.45    1.57 
   2   3 -26    2.91    0.52 
   3   3 -26    0.18    0.25 
   4   3 -26   -0.04    0.21 
   5   3 -26   -0.01    0.19 
   6   3 -26    0.10    0.15 
   0   4 -26    3.39    0.57 
   1   4 -26    3.39    0.50 
   2   4 -26    1.52    0.30 
   3   4 -26   -0.12    0.21 
   4   4 -26    2.22    0.39 
   5   4 -26    0.30    0.17 
   0   5 -26    4.86    0.59 
   1   5 -26    0.40    0.24 
   2   5 -26    0.57    0.23 
   3   5 -26    2.41    0.37 
   4   5 -26    0.33    0.17 
   1   6 -26    0.38    0.21 
   2   6 -26    4.04    0.47 
   3   6 -26    0.31    0.16 
   2   7 -26    0.13    0.14 
   3 -10 -25    0.00    0.15 
   5 -10 -25    1.21    0.15 
   6 -10 -25    1.70    0.17 
   7 -10 -25    1.43    0.17 
   1  -9 -25    3.65    0.45 
   2  -9 -25    2.93    0.39 
   3  -9 -25    0.15    0.09 
   4  -9 -25   -0.05    0.09 
   5  -9 -25    2.00    0.23 
   6  -9 -25    9.11    0.60 
   7  -9 -25    0.53    0.12 
   8  -9 -25    0.22    0.10 
  -1  -8 -25    0.35    0.18 
   0  -8 -25   11.73    1.09 
   1  -8 -25    1.43    0.15 
   2  -8 -25    4.58    0.32 
   3  -8 -25    0.65    0.13 
   4  -8 -25    0.53    0.13 
   5  -8 -25    0.41    0.13 
   6  -8 -25    1.07    0.17 
   7  -8 -25    5.20    0.40 
   8  -8 -25   11.80    0.76 
   9  -8 -25    3.73    0.29 
  -3  -7 -25    1.96    0.28 
  -2  -7 -25    0.17    0.19 
  -1  -7 -25    5.81    0.33 
   0  -7 -25    7.24    0.47 
   1  -7 -25   18.29    0.88 
   2  -7 -25   -0.01    0.13 
   3  -7 -25    4.13    0.25 
   4  -7 -25    7.19    0.33 
   5  -7 -25    0.25    0.10 
   6  -7 -25    1.05    0.13 
   7  -7 -25    8.19    0.57 
   8  -7 -25    0.82    0.14 
   9  -7 -25    2.52    0.23 
  10  -7 -25    0.00    0.07 
  -4  -6 -25    1.34    0.27 
  -3  -6 -25    8.86    0.49 
  -2  -6 -25    1.19    0.13 
  -1  -6 -25    1.29    0.15 
   0  -6 -25    0.22    0.13 
   1  -6 -25    3.48    0.28 
   2  -6 -25   -0.01    0.11 
   3  -6 -25    1.71    0.15 
   4  -6 -25    7.55    0.36 
   5  -6 -25    0.35    0.11 
   6  -6 -25    0.09    0.10 
   7  -6 -25   16.74    0.78 
   8  -6 -25    5.11    0.38 
   9  -6 -25    0.04    0.10 
  -4  -5 -25    2.28    0.19 
  -3  -5 -25    0.81    0.13 
  -2  -5 -25    0.51    0.13 
  -1  -5 -25    0.58    0.14 
   0  -5 -25    1.84    0.23 
   1  -5 -25    0.35    0.12 
   2  -5 -25    0.33    0.12 
   3  -5 -25    8.86    0.42 
   4  -5 -25   16.28    0.64 
   5  -5 -25    2.29    0.19 
   6  -5 -25    2.80    0.21 
   7  -5 -25    0.20    0.10 
   8  -5 -25    0.72    0.14 
  -5  -4 -25    0.08    0.12 
  -4  -4 -25    0.39    0.12 
  -3  -4 -25    6.79    0.41 
  -2  -4 -25    7.25    0.45 
  -1  -4 -25   15.50    0.81 
   0  -4 -25    1.76    0.19 
   1  -4 -25    0.16    0.12 
   2  -4 -25    8.76    0.41 
   3  -4 -25    0.55    0.13 
   4  -4 -25    1.08    0.14 
   5  -4 -25    0.33    0.11 
   6  -4 -25    0.00    0.10 
   7  -4 -25    4.14    0.23 
  -5  -3 -25    1.08    0.18 
  -4  -3 -25    4.57    0.39 
  -3  -3 -25    1.37    0.18 
  -2  -3 -25    9.83    0.53 
  -1  -3 -25    0.44    0.15 
   0  -3 -25   13.59    0.76 
   1  -3 -25    0.07    0.12 
   2  -3 -25    5.60    0.30 
   3  -3 -25   14.31    0.61 
   4  -3 -25    0.11    0.11 
   5  -3 -25    0.25    0.11 
   6  -3 -25    1.10    0.30 
   7  -3 -25    6.59    0.70 
  -6  -2 -25    5.72    0.41 
  -5  -2 -25    0.30    0.17 
  -4  -2 -25   -0.08    0.17 
  -3  -2 -25    0.29    0.15 
  -2  -2 -25    8.56    0.52 
  -1  -2 -25    5.50    0.38 
   0  -2 -25    6.16    0.41 
   1  -2 -25   -0.14    0.12 
   2  -2 -25    5.83    0.32 
   3  -2 -25   -0.12    0.11 
   4  -2 -25    9.04    0.53 
   5  -2 -25    8.84    0.94 
   6  -2 -25    7.69    0.78 
   7  -2 -25    0.32    0.21 
   8  -2 -25    0.72    0.20 
  -6  -1 -25   17.52    1.09 
  -5  -1 -25    3.45    0.35 
  -4  -1 -25    0.43    0.19 
  -3  -1 -25    0.33    0.19 
  -2  -1 -25    0.03    0.14 
  -1  -1 -25   -0.16    0.14 
   0  -1 -25    7.86    0.50 
   1  -1 -25    8.89    0.40 
   2  -1 -25   -0.06    0.15 
   3  -1 -25    4.47    0.69 
   4  -1 -25    0.64    0.30 
   5  -1 -25   15.21    1.40 
   6  -1 -25    0.23    0.23 
   7  -1 -25    1.12    0.25 
   8  -1 -25    4.26    0.54 
  -6   0 -25    0.14    0.18 
  -5   0 -25    2.03    0.25 
  -4   0 -25    0.65    0.20 
  -2   0 -25    6.08    0.41 
  -1   0 -25    7.83    0.50 
   0   0 -25   -0.07    0.27 
   1   0 -25    8.88    0.90 
   2   0 -25    6.49    0.75 
   3   0 -25   14.67    1.34 
   4   0 -25    0.89    0.31 
   5   0 -25    2.09    0.48 
   6   0 -25    0.29    0.24 
   7   0 -25   10.05    0.82 
   8   0 -25   11.24    1.06 
  -6   1 -25    0.49    0.19 
  -5   1 -25   13.45    1.00 
  -4   1 -25    0.62    0.20 
  -3   1 -25    4.88    0.47 
  -2   1 -25    0.04    0.18 
  -1   1 -25    9.34    0.90 
   0   1 -25    8.38    0.90 
   1   1 -25   -0.13    0.25 
   2   1 -25    0.14    0.28 
   3   1 -25    0.12    0.28 
   4   1 -25    0.41    0.28 
   5   1 -25    2.91    0.51 
   6   1 -25   17.01    1.52 
   7   1 -25    0.62    0.21 
   8   1 -25    4.08    0.41 
  -6   2 -25    7.35    0.56 
  -5   2 -25    7.92    0.65 
  -4   2 -25    8.15    0.64 
  -1   2 -25    0.11    0.27 
   0   2 -25    6.12    0.72 
   1   2 -25    5.21    0.69 
   2   2 -25    9.20    0.94 
   3   2 -25   -0.12    0.27 
   4   2 -25   -0.05    0.25 
   5   2 -25    0.22    0.24 
   6   2 -25    5.80    0.57 
   7   2 -25    2.80    0.35 
  -6   3 -25    1.29    0.23 
   0   3 -25   13.72    1.33 
   1   3 -25    0.13    0.28 
   2   3 -25   10.64    0.96 
   3   3 -25    1.63    0.33 
   4   3 -25    4.96    0.57 
   5   3 -25    0.98    0.25 
   6   3 -25    0.12    0.17 
   7   3 -25    0.06    0.12 
   0   4 -25    1.32    0.32 
   1   4 -25   14.89    1.41 
   2   4 -25    7.06    0.79 
   3   4 -25    6.95    0.73 
   4   4 -25    0.22    0.22 
   5   4 -25   -0.02    0.18 
   6   4 -25    0.07    0.14 
   0   5 -25    2.21    0.47 
   1   5 -25    0.73    0.26 
   2   5 -25    0.60    0.25 
   3   5 -25    1.05    0.25 
   4   5 -25    2.56    0.36 
   5   5 -25    1.59    0.27 
   1   6 -25    1.59    0.28 
   2   6 -25    1.18    0.25 
   3   6 -25    9.43    0.86 
   4   6 -25    1.53    0.27 
   1   7 -25    6.34    0.58 
   2   7 -25    0.36    0.17 
   3   7 -25    1.86    0.26 
   2 -10 -24    1.47    0.27 
   3 -10 -24    0.07    0.17 
   4 -10 -24    0.81    0.23 
   5 -10 -24    0.00    0.10 
   6 -10 -24    3.94    0.32 
   7 -10 -24    1.38    0.17 
   8 -10 -24    1.39    0.18 
   0  -9 -24    0.16    0.17 
   1  -9 -24    5.50    0.56 
   2  -9 -24    0.09    0.20 
   3  -9 -24    0.45    0.10 
   4  -9 -24    2.56    0.22 
   5  -9 -24    0.65    0.14 
   6  -9 -24    3.25    0.31 
   7  -9 -24    5.05    0.37 
   8  -9 -24    1.43    0.19 
   9  -9 -24    0.17    0.09 
  -2  -8 -24    1.98    0.31 
  -1  -8 -24    1.50    0.34 
   0  -8 -24    0.87    0.24 
   1  -8 -24    6.99    0.42 
   2  -8 -24    0.00    0.11 
   3  -8 -24    0.10    0.09 
   4  -8 -24    6.48    0.31 
   5  -8 -24    2.04    0.16 
   6  -8 -24    0.41    0.11 
   7  -8 -24    3.17    0.22 
   8  -8 -24    0.28    0.13 
   9  -8 -24    5.29    0.37 
  10  -8 -24    1.14    0.15 
  -3  -7 -24    0.98    0.22 
  -2  -7 -24    5.49    0.56 
  -1  -7 -24    2.72    0.24 
   0  -7 -24    4.94    0.30 
   1  -7 -24    0.37    0.13 
   2  -7 -24    1.64    0.17 
   3  -7 -24    0.80    0.12 
   4  -7 -24    8.24    0.39 
   5  -7 -24    1.64    0.15 
   6  -7 -24    0.34    0.12 
   7  -7 -24    3.65    0.26 
   8  -7 -24    7.72    0.53 
   9  -7 -24    0.06    0.11 
  10  -7 -24    0.23    0.09 
  -4  -6 -24    4.25    0.47 
  -3  -6 -24    3.69    0.46 
  -2  -6 -24    0.33    0.12 
  -1  -6 -24    0.15    0.12 
   0  -6 -24    1.34    0.17 
   1  -6 -24    1.75    0.16 
   2  -6 -24    3.00    0.23 
   3  -6 -24    6.73    0.32 
   4  -6 -24    1.47    0.15 
   5  -6 -24    4.38    0.26 
   6  -6 -24    1.37    0.13 
   7  -6 -24    0.19    0.12 
   8  -6 -24    0.30    0.10 
   9  -6 -24    0.44    0.13 
  10  -6 -24    1.15    0.15 
  -4  -5 -24    0.38    0.12 
  -3  -5 -24    1.21    0.16 
  -2  -5 -24    0.99    0.16 
  -1  -5 -24    3.96    0.32 
   0  -5 -24    0.98    0.17 
   1  -5 -24    0.79    0.13 
   2  -5 -24    0.04    0.12 
   3  -5 -24   10.86    0.47 
   4  -5 -24    0.35    0.12 
   5  -5 -24    0.97    0.13 
   6  -5 -24    1.75    0.15 
   7  -5 -24    1.47    0.13 
   8  -5 -24    0.02    0.08 
   9  -5 -24    2.72    0.18 
  10  -5 -24    0.16    0.11 
  -5  -4 -24    2.47    0.26 
  -4  -4 -24    6.91    0.40 
  -3  -4 -24    9.07    0.49 
  -2  -4 -24    1.78    0.22 
  -1  -4 -24    0.26    0.15 
   0  -4 -24    7.43    0.37 
   1  -4 -24    0.28    0.12 
   2  -4 -24    0.07    0.12 
   3  -4 -24    3.64    0.25 
   4  -4 -24    7.03    0.37 
   5  -4 -24    0.49    0.12 
   6  -4 -24    3.35    0.19 
   7  -4 -24    0.57    0.09 
   8  -4 -24    6.03    0.52 
   9  -4 -24    0.65    0.15 
  10  -4 -24    4.15    0.34 
  -5  -3 -24    0.25    0.16 
  -4  -3 -24    0.54    0.18 
  -3  -3 -24    5.54    0.41 
  -2  -3 -24   10.37    0.59 
  -1  -3 -24    3.86    0.32 
   0  -3 -24    0.67    0.13 
   1  -3 -24    0.26    0.12 
   2  -3 -24    1.57    0.16 
   3  -3 -24    0.56    0.13 
   4  -3 -24    0.38    0.12 
   5  -3 -24    0.10    0.11 
   6  -3 -24    6.21    0.42 
   7  -3 -24    7.37    0.85 
  -6  -2 -24    0.29    0.16 
  -5  -2 -24    2.02    0.31 
  -4  -2 -24    3.75    0.37 
  -3  -2 -24    0.22    0.15 
  -2  -2 -24    0.13    0.15 
  -1  -2 -24    1.88    0.20 
   0  -2 -24   -0.05    0.11 
   1  -2 -24    0.41    0.12 
   2  -2 -24    0.07    0.12 
   3  -2 -24    0.29    0.12 
   4  -2 -24    0.14    0.15 
   5  -2 -24   10.54    1.06 
   6  -2 -24    1.68    0.33 
   7  -2 -24    1.22    0.27 
   8  -2 -24    0.40    0.20 
  -6  -1 -24    0.14    0.18 
  -5  -1 -24    1.36    0.23 
  -4  -1 -24    0.72    0.20 
  -3  -1 -24    0.18    0.18 
  -2  -1 -24    0.25    0.15 
  -1  -1 -24    0.17    0.15 
   0  -1 -24    0.91    0.14 
   1  -1 -24    1.18    0.14 
   2  -1 -24    0.14    0.15 
   3  -1 -24    1.48    0.36 
   4  -1 -24    3.51    0.60 
   5  -1 -24    0.26    0.28 
   6  -1 -24    4.42    0.57 
   7  -1 -24    0.04    0.21 
   8  -1 -24    3.27    0.39 
  -6   0 -24    1.20    0.22 
  -5   0 -24    0.91    0.21 
  -4   0 -24    7.62    0.58 
  -3   0 -24    0.34    0.19 
  -2   0 -24    0.07    0.14 
  -1   0 -24    1.51    0.18 
   0   0 -24    5.63    0.39 
   1   0 -24    1.51    0.20 
   2   0 -24   -0.16    0.28 
   3   0 -24    0.36    0.31 
   4   0 -24    8.17    0.86 
   5   0 -24    0.88    0.31 
   6   0 -24    1.10    0.30 
   7   0 -24    3.50    0.53 
   8   0 -24    0.40    0.17 
  -7   1 -24   -0.02    0.18 
  -6   1 -24    4.40    0.43 
  -5   1 -24    0.53    0.20 
  -4   1 -24    3.31    0.40 
  -3   1 -24    1.37    0.24 
  -2   1 -24    0.25    0.18 
  -1   1 -24    1.57    0.33 
   0   1 -24    1.17    0.33 
   1   1 -24    0.17    0.29 
   2   1 -24    0.33    0.30 
   3   1 -24    0.38    0.29 
   4   1 -24    0.44    0.29 
   5   1 -24    1.61    0.34 
   6   1 -24    0.31    0.24 
   7   1 -24    7.81    0.75 
   8   1 -24    4.48    0.52 
  -6   2 -24    1.44    0.24 
  -5   2 -24   10.06    0.74 
  -4   2 -24    0.10    0.19 
  -1   2 -24    0.60    0.29 
   0   2 -24    0.08    0.28 
   1   2 -24    1.79    0.38 
   2   2 -24    0.26    0.29 
   3   2 -24    0.33    0.29 
   4   2 -24    3.88    0.57 
   5   2 -24    1.75    0.33 
   6   2 -24    0.24    0.22 
   7   2 -24    0.04    0.18 
   8   2 -24    1.21    0.23 
  -6   3 -24    5.52    0.50 
  -5   3 -24    0.26    0.20 
   0   3 -24    0.67    0.31 
   1   3 -24    4.08    0.62 
   2   3 -24   10.14    1.05 
   3   3 -24    5.58    0.73 
   4   3 -24    0.58    0.29 
   5   3 -24    0.17    0.24 
   6   3 -24    0.36    0.20 
   7   3 -24   -0.02    0.15 
   0   4 -24    7.89    0.85 
   1   4 -24    0.25    0.28 
   2   4 -24    1.86    0.36 
   3   4 -24    9.56    0.89 
   4   4 -24    7.57    0.73 
   5   4 -24    2.48    0.42 
   6   4 -24    1.26    0.29 
   0   5 -24    0.94    0.31 
   1   5 -24    3.52    0.59 
   2   5 -24    0.98    0.30 
   3   5 -24    1.43    0.31 
   4   5 -24    0.44    0.22 
   5   5 -24    0.01    0.16 
   1   6 -24    0.04    0.24 
   2   6 -24    0.13    0.23 
   3   6 -24    3.90    0.48 
   4   6 -24    4.72    0.48 
   1   7 -24    2.79    0.45 
   2   7 -24    5.13    0.54 
   3   7 -24    1.28    0.27 
   2   8 -24    1.94    0.26 
   1 -10 -23    0.12    0.16 
   2 -10 -23   -0.17    0.17 
   3 -10 -23    0.11    0.19 
   4 -10 -23    1.33    0.28 
   5 -10 -23    0.13    0.11 
   6 -10 -23    2.93    0.28 
   7 -10 -23    0.24    0.11 
   8 -10 -23    0.13    0.10 
   9 -10 -23    0.45    0.10 
  -1  -9 -23    0.60    0.18 
   0  -9 -23    0.31    0.20 
   1  -9 -23    1.28    0.26 
   2  -9 -23    0.00    0.21 
   3  -9 -23    0.19    0.11 
   4  -9 -23    0.75    0.13 
   5  -9 -23    8.06    0.39 
   6  -9 -23    0.06    0.10 
   7  -9 -23    0.12    0.14 
   8  -9 -23    0.14    0.12 
   9  -9 -23    0.09    0.11 
  10  -9 -23    0.10    0.09 
  -2  -8 -23    0.23    0.19 
  -1  -8 -23    0.20    0.21 
   0  -8 -23    0.11    0.22 
   1  -8 -23    0.87    0.13 
   2  -8 -23    3.97    0.31 
   3  -8 -23    5.76    0.27 
   4  -8 -23    1.34    0.13 
   5  -8 -23    6.09    0.30 
   6  -8 -23    2.16    0.21 
   7  -8 -23    0.61    0.12 
   8  -8 -23    0.36    0.10 
   9  -8 -23    0.99    0.15 
  10  -8 -23   -0.10    0.10 
  -4  -7 -23    1.29    0.26 
  -3  -7 -23   -0.12    0.18 
  -2  -7 -23    0.14    0.22 
  -1  -7 -23    1.08    0.14 
   0  -7 -23    0.41    0.12 
   1  -7 -23    3.61    0.29 
   2  -7 -23    0.15    0.11 
   3  -7 -23    3.63    0.24 
   4  -7 -23    3.59    0.22 
   5  -7 -23    0.84    0.13 
   6  -7 -23    0.92    0.14 
   7  -7 -23    0.06    0.12 
   8  -7 -23    0.92    0.13 
   9  -7 -23    0.03    0.10 
  10  -7 -23    0.20    0.08 
  11  -7 -23    0.18    0.08 
  -4  -6 -23    3.24    0.44 
  -3  -6 -23    0.10    0.22 
  -2  -6 -23    2.15    0.23 
  -1  -6 -23    0.92    0.15 
   0  -6 -23    0.66    0.15 
   1  -6 -23    0.23    0.11 
   2  -6 -23    4.24    0.25 
   3  -6 -23    3.09    0.24 
   4  -6 -23    4.39    0.26 
   5  -6 -23    0.30    0.12 
   6  -6 -23    0.44    0.13 
   7  -6 -23    3.18    0.21 
   8  -6 -23    4.85    0.23 
   9  -6 -23    0.24    0.10 
  10  -6 -23    1.98    0.16 
  11  -6 -23    0.04    0.10 
  -4  -5 -23    7.02    0.45 
  -3  -5 -23    6.09    0.38 
  -2  -5 -23    0.85    0.15 
  -1  -5 -23    0.40    0.15 
   0  -5 -23    0.15    0.12 
   1  -5 -23    4.81    0.28 
   2  -5 -23    1.33    0.15 
   3  -5 -23    4.33    0.26 
   4  -5 -23    1.65    0.16 
   5  -5 -23    0.03    0.12 
   6  -5 -23    0.08    0.10 
   7  -5 -23    0.24    0.10 
   8  -5 -23    5.05    0.25 
   9  -5 -23    0.87    0.12 
  10  -5 -23    0.16    0.13 
  11  -5 -23    0.22    0.10 
  -5  -4 -23    1.18    0.18 
  -4  -4 -23    0.86    0.16 
  -3  -4 -23    2.58    0.28 
  -2  -4 -23    3.74    0.32 
  -1  -4 -23    1.88    0.20 
   0  -4 -23    5.04    0.28 
   1  -4 -23    1.01    0.14 
   2  -4 -23    1.04    0.14 
   3  -4 -23   17.24    0.71 
   4  -4 -23    4.62    0.28 
   5  -4 -23    4.77    0.25 
   6  -4 -23    3.05    0.21 
   7  -4 -23    3.21    0.21 
   8  -4 -23    1.32    0.21 
   9  -4 -23    7.88    0.59 
  10  -4 -23    3.51    0.30 
  -6  -3 -23    0.00    0.15 
  -5  -3 -23    4.98    0.43 
  -4  -3 -23    4.39    0.31 
  -3  -3 -23    3.62    0.31 
  -2  -3 -23    3.80    0.33 
  -1  -3 -23   16.28    0.89 
   0  -3 -23    2.16    0.19 
   1  -3 -23    0.20    0.12 
   2  -3 -23    0.30    0.12 
   3  -3 -23    2.01    0.17 
   4  -3 -23    0.78    0.13 
   5  -3 -23    1.36    0.13 
   6  -3 -23    3.09    0.24 
   7  -3 -23    2.70    0.29 
   8  -3 -23    5.99    0.49 
  -6  -2 -23    4.54    0.42 
  -5  -2 -23    0.39    0.19 
  -4  -2 -23    3.93    0.39 
  -3  -2 -23    1.80    0.19 
  -2  -2 -23    0.75    0.17 
  -1  -2 -23    0.21    0.14 
   0  -2 -23    0.15    0.12 
   1  -2 -23    1.79    0.16 
   2  -2 -23    0.12    0.12 
   3  -2 -23    0.23    0.12 
   4  -2 -23    0.94    0.18 
   5  -2 -23    3.67    0.61 
   6  -2 -23    4.03    0.58 
   7  -2 -23    1.23    0.28 
  -6  -1 -23    2.98    0.38 
  -5  -1 -23    0.26    0.19 
  -4  -1 -23    5.07    0.45 
  -3  -1 -23    0.85    0.20 
  -2  -1 -23    0.29    0.15 
  -1  -1 -23    1.69    0.20 
   0  -1 -23   12.81    0.57 
   1  -1 -23   13.03    0.57 
   2  -1 -23    2.10    0.23 
   3  -1 -23    0.32    0.16 
   4  -1 -23   17.56    1.58 
   5  -1 -23    1.80    0.37 
   6  -1 -23    0.31    0.27 
   7  -1 -23    1.04    0.28 
   8  -1 -23    0.60    0.22 
  -7   0 -23    0.26    0.19 
  -6   0 -23    1.03    0.22 
  -5   0 -23   -0.01    0.19 
  -4   0 -23    3.86    0.43 
  -3   0 -23    1.79    0.25 
  -2   0 -23    0.25    0.15 
  -1   0 -23   12.32    0.72 
   0   0 -23    0.01    0.12 
   1   0 -23   13.90    0.74 
   2   0 -23    0.02    0.29 
   3   0 -23    1.81    0.39 
   4   0 -23    4.22    0.67 
   5   0 -23   -0.14    0.27 
   6   0 -23    1.14    0.30 
   7   0 -23    0.17    0.23 
   8   0 -23    0.14    0.18 
  -7   1 -23    1.42    0.23 
  -6   1 -23    0.18    0.20 
  -5   1 -23    1.60    0.25 
  -4   1 -23   16.01    1.10 
  -3   1 -23    0.28    0.19 
  -2   1 -23    1.76    0.24 
   0   1 -23   14.21    1.28 
   1   1 -23    1.90    0.38 
   2   1 -23    0.13    0.29 
   3   1 -23    0.91    0.33 
   4   1 -23    4.89    0.67 
   5   1 -23   -0.13    0.26 
   6   1 -23    3.16    0.52 
   7   1 -23    0.92    0.25 
   8   1 -23    0.91    0.21 
  -7   2 -23    1.55    0.24 
  -6   2 -23    3.72    0.42 
  -5   2 -23    3.40    0.41 
  -4   2 -23    1.04    0.21 
  -1   2 -23    1.63    0.34 
   0   2 -23    0.23    0.28 
   1   2 -23   -0.04    0.28 
   2   2 -23    1.17    0.35 
   3   2 -23    1.82    0.37 
   4   2 -23    3.76    0.59 
   5   2 -23    0.48    0.27 
   6   2 -23    4.93    0.59 
   7   2 -23    0.14    0.20 
   8   2 -23    0.03    0.14 
  -6   3 -23    3.11    0.38 
  -5   3 -23    1.55    0.24 
   0   3 -23    1.85    0.38 
   1   3 -23   17.00    1.57 
   2   3 -23    3.87    0.62 
   3   3 -23    3.47    0.58 
   4   3 -23    4.34    0.59 
   5   3 -23    4.89    0.63 
   6   3 -23    0.20    0.22 
   7   3 -23    0.03    0.16 
   0   4 -23    5.17    0.66 
   1   4 -23    1.92    0.38 
   2   4 -23    3.75    0.61 
   3   4 -23    2.88    0.55 
   4   4 -23    0.72    0.29 
   5   4 -23    1.34    0.27 
   6   4 -23    2.40    0.35 
   7   4 -23    0.22    0.14 
   0   5 -23    0.02    0.29 
   1   5 -23    0.40    0.29 
   2   5 -23    0.88    0.30 
   3   5 -23    6.06    0.70 
   4   5 -23    8.14    0.79 
   5   5 -23    0.19    0.19 
   6   5 -23    0.16    0.14 
   1   6 -23    1.22    0.30 
   2   6 -23    2.48    0.46 
   3   6 -23    0.19    0.22 
   4   6 -23    3.41    0.44 
   5   6 -23    0.39    0.15 
   1   7 -23    0.99    0.27 
   2   7 -23    0.31    0.21 
   3   7 -23    0.22    0.18 
   4   7 -23    1.27    0.26 
   2   8 -23    0.24    0.16 
   2 -11 -22    0.82    0.18 
   3 -11 -22    3.60    0.39 
   7 -11 -22    0.17    0.10 
   8 -11 -22    3.97    0.32 
   9 -11 -22    0.03    0.08 
   0 -10 -22    0.22    0.16 
   1 -10 -22   -0.21    0.17 
   2 -10 -22    1.63    0.35 
   3 -10 -22    1.23    0.26 
   4 -10 -22    2.51    0.46 
   5 -10 -22    3.07    0.27 
   6 -10 -22    6.08    0.48 
   7 -10 -22    3.55    0.30 
   8 -10 -22    1.44    0.20 
   9 -10 -22    0.86    0.13 
  10 -10 -22    0.36    0.09 
  -2  -9 -22    0.02    0.15 
  -1  -9 -22    1.00    0.22 
   0  -9 -22    1.84    0.36 
   1  -9 -22    5.32    0.57 
   2  -9 -22    3.14    0.50 
   3  -9 -22   12.88    0.73 
   4  -9 -22    0.35    0.10 
   5  -9 -22    6.55    0.38 
   6  -9 -22    0.94    0.13 
   7  -9 -22    0.11    0.10 
   8  -9 -22    0.80    0.16 
   9  -9 -22    1.02    0.16 
  10  -9 -22    0.05    0.11 
  11  -9 -22    0.84    0.14 
  -3  -8 -22    4.94    0.48 
  -2  -8 -22    1.51    0.35 
  -1  -8 -22    0.59    0.25 
   0  -8 -22    5.53    0.61 
   1  -8 -22   15.94    0.84 
   2  -8 -22    5.46    0.27 
   3  -8 -22    3.18    0.23 
   4  -8 -22   11.42    0.50 
   5  -8 -22    0.55    0.12 
   6  -8 -22    0.14    0.12 
   7  -8 -22    2.26    0.21 
   8  -8 -22    4.85    0.29 
   9  -8 -22    3.77    0.27 
  10  -8 -22    1.60    0.16 
  11  -8 -22    3.12    0.26 
  -4  -7 -22    0.59    0.18 
  -3  -7 -22    3.03    0.46 
  -2  -7 -22    0.12    0.24 
  -1  -7 -22    2.96    0.47 
   0  -7 -22    0.45    0.14 
   1  -7 -22    6.04    0.34 
   2  -7 -22   11.46    0.47 
   3  -7 -22   10.60    0.45 
   4  -7 -22    0.27    0.12 
   5  -7 -22    4.16    0.25 
   6  -7 -22    5.88    0.36 
   7  -7 -22    0.54    0.13 
   8  -7 -22   16.21    0.63 
   9  -7 -22    3.02    0.20 
  10  -7 -22    1.07    0.10 
  11  -7 -22    0.45    0.08 
  -5  -6 -22    2.44    0.35 
  -4  -6 -22    8.13    0.72 
  -3  -6 -22    0.61    0.27 
  -2  -6 -22    0.13    0.13 
  -1  -6 -22    5.94    0.39 
   0  -6 -22    1.58    0.18 
   1  -6 -22    0.58    0.13 
   2  -6 -22    1.11    0.14 
   3  -6 -22    3.96    0.25 
   4  -6 -22    3.36    0.24 
   5  -6 -22   -0.03    0.12 
   6  -6 -22    1.51    0.14 
   7  -6 -22    6.96    0.32 
   8  -6 -22    5.16    0.25 
   9  -6 -22   14.34    0.48 
  10  -6 -22    3.14    0.18 
  11  -6 -22    0.02    0.07 
  -5  -5 -22    2.53    0.43 
  -4  -5 -22    8.25    0.44 
  -3  -5 -22    0.12    0.13 
  -2  -5 -22    3.58    0.31 
  -1  -5 -22    0.23    0.14 
   0  -5 -22    1.64    0.17 
   1  -5 -22    0.32    0.12 
   2  -5 -22    3.06    0.23 
   3  -5 -22    0.25    0.12 
   4  -5 -22    0.87    0.14 
   5  -5 -22    1.25    0.13 
   6  -5 -22    0.46    0.11 
   7  -5 -22    9.81    0.44 
   8  -5 -22    3.22    0.19 
   9  -5 -22    0.61    0.09 
  10  -5 -22    3.09    0.30 
  11  -5 -22    2.41    0.25 
  -5  -4 -22    0.57    0.17 
  -4  -4 -22   10.95    0.63 
  -3  -4 -22    0.30    0.15 
  -2  -4 -22    3.43    0.31 
  -1  -4 -22    0.56    0.16 
   0  -4 -22    2.27    0.21 
   1  -4 -22    4.86    0.28 
   2  -4 -22    2.30    0.20 
   3  -4 -22    1.31    0.15 
   4  -4 -22    2.46    0.23 
   5  -4 -22    0.29    0.11 
   6  -4 -22    0.96    0.12 
   7  -4 -22   10.16    0.36 
   8  -4 -22   12.16    0.47 
   9  -4 -22    7.12    0.57 
  10  -4 -22    5.88    0.52 
  11  -4 -22    0.35    0.11 
  -6  -3 -22   14.08    0.91 
  -5  -3 -22    5.19    0.39 
  -4  -3 -22    9.24    0.56 
  -3  -3 -22    3.99    0.32 
  -2  -3 -22    0.49    0.15 
  -1  -3 -22    1.14    0.14 
   0  -3 -22    3.98    0.25 
   1  -3 -22    7.75    0.39 
   2  -3 -22    6.57    0.39 
   3  -3 -22    3.82    0.25 
   4  -3 -22    4.53    0.23 
   5  -3 -22    2.31    0.19 
   6  -3 -22    3.39    0.21 
   7  -3 -22    0.15    0.15 
   8  -3 -22    0.72    0.19 
   9  -3 -22    1.28    0.19 
  -6  -2 -22    4.53    0.44 
  -5  -2 -22   11.43    0.75 
  -4  -2 -22    0.65    0.20 
  -3  -2 -22    2.96    0.29 
  -2  -2 -22    2.21    0.27 
  -1  -2 -22    7.23    0.39 
   0  -2 -22    1.20    0.21 
   1  -2 -22   26.75    1.81 
   2  -2 -22    1.21    0.23 
   3  -2 -22    7.28    0.41 
   4  -2 -22    1.68    0.23 
   5  -2 -22    0.24    0.29 
   6  -2 -22    3.45    0.58 
   7  -2 -22    3.30    0.55 
  -7  -1 -22   17.10    1.06 
  -6  -1 -22    8.76    0.57 
  -5  -1 -22    0.43    0.21 
  -4  -1 -22    0.36    0.19 
  -3  -1 -22    3.92    0.41 
  -2  -1 -22    7.73    0.58 
  -1  -1 -22   28.60    1.82 
   0  -1 -22    7.94    0.59 
   1  -1 -22    7.58    0.59 
   2  -1 -22   27.30    1.81 
   3  -1 -22    7.39    0.57 
   4  -1 -22    1.53    0.37 
   5  -1 -22    1.05    0.33 
   6  -1 -22    0.25    0.28 
   7  -1 -22    5.51    0.70 
   8  -1 -22    1.40    0.30 
  -7   0 -22    0.52    0.20 
  -6   0 -22    1.25    0.24 
  -5   0 -22    2.03    0.25 
  -4   0 -22    2.65    0.35 
  -3   0 -22    3.56    0.39 
   0   0 -22   73.71    4.71 
   1   0 -22    7.26    0.58 
   3   0 -22    4.18    0.64 
   4   0 -22    2.76    0.56 
   5   0 -22    1.98    0.38 
   6   0 -22    1.02    0.32 
   7   0 -22    0.36    0.25 
   8   0 -22    4.54    0.56 
  -7   1 -22    6.65    0.52 
  -6   1 -22    0.11    0.20 
  -5   1 -22    0.78    0.22 
  -4   1 -22    1.81    0.24 
  -3   1 -22    6.47    0.55 
   0   1 -22    7.54    0.59 
   3   1 -22    3.68    0.67 
   4   1 -22    0.39    0.30 
   5   1 -22    0.74    0.30 
   6   1 -22    7.77    0.78 
   7   1 -22   15.74    1.46 
   8   1 -22    4.30    0.51 
  -7   2 -22    3.89    0.42 
  -6   2 -22    3.71    0.41 
  -5   2 -22    0.28    0.20 
  -4   2 -22    1.72    0.25 
   2   2 -22    1.89    0.39 
   3   2 -22    3.01    0.58 
   4   2 -22    0.67    0.31 
   5   2 -22    9.85    1.06 
   6   2 -22    4.39    0.62 
   7   2 -22    4.60    0.50 
   8   2 -22    2.40    0.32 
  -7   3 -22    0.19    0.21 
  -6   3 -22    3.41    0.41 
  -5   3 -22    2.12    0.36 
   0   3 -22    3.67    0.61 
   1   3 -22    1.37    0.35 
   2   3 -22    0.56    0.31 
   3   3 -22    3.60    0.62 
   4   3 -22    8.93    1.00 
   5   3 -22    4.70    0.58 
   6   3 -22   15.31    1.29 
   7   3 -22    1.47    0.32 
   8   3 -22    2.97    0.37 
   0   4 -22    2.42    0.42 
   1   4 -22    0.35    0.31 
   2   4 -22    2.74    0.58 
   3   4 -22    0.09    0.28 
   4   4 -22   11.30    1.12 
   5   4 -22    0.24    0.25 
   6   4 -22    4.17    0.45 
   7   4 -22    0.29    0.17 
   0   5 -22    1.54    0.36 
   1   5 -22    0.14    0.28 
   2   5 -22    3.83    0.60 
   3   5 -22    0.08    0.26 
   4   5 -22    7.95    0.80 
   5   5 -22    2.95    0.45 
   6   5 -22    0.07    0.16 
   1   6 -22    6.11    0.73 
   2   6 -22    0.21    0.26 
   3   6 -22    0.55    0.26 
   4   6 -22    8.81    0.73 
   5   6 -22    2.88    0.35 
   1   7 -22    2.43    0.46 
   2   7 -22   -0.04    0.21 
   3   7 -22    3.42    0.46 
   4   7 -22    0.78    0.18 
   1   8 -22    0.74    0.23 
   2   8 -22    1.42    0.32 
   3   8 -22    4.74    0.47 
   1 -11 -21   -0.09    0.14 
   2 -11 -21    0.54    0.17 
   3 -11 -21    1.02    0.23 
   7 -11 -21    7.28    0.50 
   8 -11 -21    0.62    0.11 
   9 -11 -21    0.25    0.10 
  10 -11 -21    7.48    0.49 
  -1 -10 -21    7.14    0.71 
   0 -10 -21    0.44    0.19 
   1 -10 -21    0.23    0.20 
   2 -10 -21    7.08    0.71 
   3 -10 -21    0.23    0.22 
   5 -10 -21    5.60    0.47 
   6 -10 -21    4.06    0.32 
   7 -10 -21    6.18    0.45 
   8 -10 -21    0.14    0.13 
   9 -10 -21    4.19    0.33 
  10 -10 -21    0.64    0.12 
  11 -10 -21    0.09    0.09 
  -2  -9 -21    0.43    0.18 
  -1  -9 -21    3.28    0.48 
   0  -9 -21    3.67    0.54 
   1  -9 -21    5.39    0.62 
   2  -9 -21   18.04    1.58 
   3  -9 -21    0.13    0.12 
   4  -9 -21   15.26    0.67 
   5  -9 -21    1.03    0.14 
   6  -9 -21    8.91    0.46 
   7  -9 -21    0.53    0.12 
   8  -9 -21    4.12    0.26 
   9  -9 -21    4.69    0.36 
  10  -9 -21    0.05    0.12 
  11  -9 -21    0.36    0.08 
  -3  -8 -21    0.79    0.21 
  -2  -8 -21    0.17    0.21 
  -1  -8 -21    4.07    0.56 
   0  -8 -21    2.44    0.47 
   1  -8 -21    0.76    0.31 
   2  -8 -21   24.77    1.31 
   3  -8 -21   14.25    0.57 
   4  -8 -21    3.81    0.26 
   5  -8 -21    1.55    0.16 
   6  -8 -21    1.34    0.16 
   7  -8 -21    3.23    0.25 
   8  -8 -21    2.16    0.18 
   9  -8 -21    5.60    0.25 
  10  -8 -21    6.81    0.30 
  11  -8 -21    1.49    0.12 
  -5  -7 -21    2.92    0.36 
  -4  -7 -21    7.44    0.74 
  -3  -7 -21    7.21    0.69 
  -2  -7 -21    0.52    0.27 
  -1  -7 -21    3.09    0.53 
   0  -7 -21   42.07    2.21 
   1  -7 -21   17.99    0.72 
   2  -7 -21    0.38    0.12 
   3  -7 -21    8.75    0.42 
   4  -7 -21    5.55    0.29 
   5  -7 -21    0.26    0.12 
   6  -7 -21    7.85    0.41 
   7  -7 -21   45.43    1.65 
   8  -7 -21    1.60    0.15 
   9  -7 -21   17.49    0.59 
  10  -7 -21    0.43    0.08 
  11  -7 -21    6.05    0.26 
  12  -7 -21    0.05    0.06 
  -5  -6 -21    0.57    0.20 
  -4  -6 -21    3.32    0.50 
  -3  -6 -21    9.93    0.93 
  -2  -6 -21    0.86    0.15 
  -1  -6 -21    7.22    0.45 
   0  -6 -21    0.66    0.12 
   1  -6 -21   10.23    0.48 
   2  -6 -21   18.16    0.71 
   3  -6 -21   20.54    0.78 
   4  -6 -21    0.70    0.14 
   5  -6 -21    1.76    0.17 
   6  -6 -21    0.90    0.13 
   7  -6 -21   18.28    0.68 
   8  -6 -21   25.49    0.85 
   9  -6 -21    0.43    0.09 
  10  -6 -21    0.39    0.08 
  11  -6 -21    0.45    0.08 
  12  -6 -21   -0.02    0.09 
  -5  -5 -21    7.87    0.72 
  -4  -5 -21    2.28    0.24 
  -3  -5 -21    1.43    0.17 
  -2  -5 -21    0.54    0.14 
  -1  -5 -21    2.20    0.27 
   0  -5 -21    5.02    0.28 
   1  -5 -21    1.05    0.14 
   2  -5 -21    2.19    0.20 
   3  -5 -21    1.73    0.16 
   4  -5 -21    1.40    0.15 
   5  -5 -21    5.02    0.26 
   6  -5 -21   10.68    0.45 
   7  -5 -21    0.50    0.12 
   8  -5 -21   14.06    0.47 
   9  -5 -21   16.23    0.55 
  10  -5 -21    6.60    0.30 
  11  -5 -21    0.30    0.13 
  12  -5 -21    3.21    0.26 
  -5  -4 -21   16.80    1.05 
  -4  -4 -21    6.05    0.42 
  -3  -4 -21    4.82    0.35 
  -2  -4 -21    0.39    0.15 
  -1  -4 -21    1.15    0.14 
   0  -4 -21    1.72    0.15 
   1  -4 -21    2.13    0.19 
   2  -4 -21   23.54    0.97 
   3  -4 -21   16.40    0.77 
   4  -4 -21    1.97    0.15 
   5  -4 -21    0.96    0.12 
   6  -4 -21   17.30    0.61 
   7  -4 -21    8.64    0.35 
   8  -4 -21    4.05    0.22 
   9  -4 -21    2.08    0.24 
  10  -4 -21    3.77    0.36 
  11  -4 -21    6.85    0.55 
  -6  -3 -21    0.81    0.19 
  -5  -3 -21   12.56    0.89 
  -4  -3 -21   10.15    0.54 
  -3  -3 -21   16.87    0.97 
  -2  -3 -21    1.50    0.18 
  -1  -3 -21   16.35    0.71 
   0  -3 -21    2.05    0.29 
   1  -3 -21    2.19    0.28 
   2  -3 -21    1.12    0.23 
   3  -3 -21    2.01    0.32 
   4  -3 -21    2.01    0.21 
   5  -3 -21    2.32    0.15 
   6  -3 -21   19.07    0.59 
   7  -3 -21    5.06    0.37 
   8  -3 -21    1.56    0.19 
   9  -3 -21    8.70    0.69 
  10  -3 -21    5.61    0.49 
  -6  -2 -21   30.97    1.64 
  -5  -2 -21    0.53    0.21 
  -4  -2 -21   16.97    1.10 
  -3  -2 -21    1.48    0.20 
  -1  -2 -21    0.79    0.20 
   0  -2 -21   39.07    2.09 
   1  -2 -21    8.29    0.59 
   2  -2 -21   37.05    2.45 
   3  -2 -21    2.28    0.33 
   4  -2 -21   21.98    1.51 
   5  -2 -21    1.10    0.19 
   6  -2 -21    0.53    0.21 
   7  -2 -21    0.25    0.26 
  -7  -1 -21    2.32    0.34 
  -6  -1 -21   16.57    1.13 
  -5  -1 -21   11.82    0.76 
  -4  -1 -21    0.67    0.20 
  -3  -1 -21    2.09    0.33 
  -1  -1 -21    7.39    0.59 
   0  -1 -21   81.14    5.14 
   1  -1 -21   80.03    5.13 
   2  -1 -21    6.37    0.58 
   3  -1 -21    0.82    0.22 
   5  -1 -21    1.81    0.37 
   6  -1 -21    1.79    0.37 
   7  -1 -21    6.44    0.79 
   8  -1 -21    2.75    0.46 
  -7   0 -21   47.21    2.74 
  -6   0 -21    1.44    0.24 
  -5   0 -21    5.75    0.47 
  -4   0 -21    1.19    0.23 
  -1   0 -21   77.65    5.14 
   0   0 -21    0.06    0.16 
   1   0 -21   79.59    5.13 
   4   0 -21    1.38    0.37 
   5   0 -21    4.89    0.68 
   6   0 -21    1.37    0.33 
   7   0 -21   41.75    3.80 
   8   0 -21    1.95    0.40 
  -7   1 -21    7.20    0.58 
  -6   1 -21    2.18    0.27 
  -5   1 -21    1.46    0.24 
  -4   1 -21   14.83    1.06 
   0   1 -21   80.76    5.13 
   4   1 -21    0.66    0.32 
   5   1 -21   11.25    1.08 
   6   1 -21   15.23    1.57 
   7   1 -21    2.04    0.45 
   8   1 -21    4.95    0.58 
  -7   2 -21    0.53    0.21 
  -6   2 -21    0.34    0.21 
  -5   2 -21    1.33    0.23 
   3   2 -21    1.79    0.39 
   4   2 -21   15.19    1.56 
   5   2 -21    0.33    0.29 
   6   2 -21   28.30    2.29 
   7   2 -21   18.25    1.57 
   8   2 -21    6.52    0.69 
   9   2 -21    0.27    0.13 
  -7   3 -21    4.42    0.47 
  -6   3 -21   18.23    1.21 
  -5   3 -21    2.27    0.35 
   2   3 -21    1.15    0.35 
   3   3 -21   16.61    1.69 
   4   3 -21    8.46    0.94 
   5   3 -21   12.09    1.27 
   6   3 -21    0.91    0.28 
   7   3 -21    0.41    0.21 
   8   3 -21    2.06    0.30 
   1   4 -21    1.61    0.37 
   2   4 -21    0.63    0.30 
   3   4 -21    4.72    0.66 
   4   4 -21    5.61    0.64 
   5   4 -21   18.77    1.50 
   6   4 -21    0.17    0.23 
   7   4 -21    6.41    0.62 
   0   5 -21    5.54    0.70 
   1   5 -21    2.40    0.40 
   2   5 -21    0.63    0.30 
   3   5 -21    1.33    0.34 
   4   5 -21    2.40    0.47 
   5   5 -21    8.46    0.73 
   6   5 -21    0.70    0.20 
   7   5 -21    0.09    0.13 
   1   6 -21    7.76    0.82 
   2   6 -21    0.64    0.29 
   3   6 -21    8.93    0.92 
   4   6 -21    3.79    0.50 
   5   6 -21    0.45    0.20 
   6   6 -21    0.11    0.14 
   1   7 -21    2.44    0.51 
   2   7 -21    0.34    0.24 
   3   7 -21    6.51    0.66 
   4   7 -21    7.90    0.74 
   5   7 -21    3.01    0.36 
   1   8 -21    4.51    0.54 
   2   8 -21    0.06    0.19 
   3   8 -21    0.46    0.18 
   2   9 -21    0.48    0.16 
   1 -11 -20    0.16    0.16 
   2 -11 -20    2.19    0.36 
   3 -11 -20    7.53    0.78 
   7 -11 -20    0.15    0.11 
   8 -11 -20    0.16    0.12 
   9 -11 -20    0.24    0.11 
  10 -11 -20    1.90    0.20 
  -1 -10 -20    2.22    0.32 
   0 -10 -20    3.79    0.50 
   1 -10 -20    0.24    0.22 
   2 -10 -20    0.23    0.22 
   3 -10 -20    7.46    0.82 
   5 -10 -20    3.11    0.29 
   6 -10 -20    2.34    0.20 
   7 -10 -20    3.29    0.22 
   8 -10 -20    0.22    0.10 
   9 -10 -20    3.68    0.33 
  10 -10 -20    4.26    0.35 
  11 -10 -20    0.17    0.10 
  -3  -9 -20    2.04    0.31 
  -2  -9 -20    0.28    0.19 
  -1  -9 -20    3.30    0.49 
   0  -9 -20    0.83    0.27 
   1  -9 -20    0.63    0.28 
   2  -9 -20    0.13    0.25 
   3  -9 -20    6.48    0.74 
   4  -9 -20    1.04    0.12 
   5  -9 -20    5.76    0.33 
   6  -9 -20    0.49    0.13 
   7  -9 -20    1.49    0.16 
   8  -9 -20    0.49    0.12 
   9  -9 -20    1.00    0.13 
  10  -9 -20    0.69    0.11 
  11  -9 -20    2.48    0.15 
  12  -9 -20    0.68    0.07 
  -4  -8 -20    0.63    0.18 
  -3  -8 -20    0.34    0.21 
  -2  -8 -20    0.44    0.25 
  -1  -8 -20    0.50    0.27 
   0  -8 -20   13.21    1.37 
   1  -8 -20   20.61    1.82 
   2  -8 -20    1.41    0.17 
   3  -8 -20   12.89    0.61 
   4  -8 -20   16.17    0.66 
   5  -8 -20    0.41    0.14 
   6  -8 -20    0.01    0.13 
   7  -8 -20    5.32    0.29 
   8  -8 -20   15.68    0.59 
   9  -8 -20    0.75    0.11 
  10  -8 -20    0.26    0.08 
  11  -8 -20    8.36    0.34 
  12  -8 -20    3.58    0.17 
  -5  -7 -20    0.12    0.16 
  -4  -7 -20    0.44    0.22 
  -3  -7 -20    2.91    0.50 
  -2  -7 -20    1.90    0.35 
  -1  -7 -20    6.37    0.72 
   0  -7 -20    2.38    0.25 
   1  -7 -20   14.54    0.65 
   2  -7 -20   38.65    1.52 
   3  -7 -20    2.33    0.21 
   4  -7 -20    1.20    0.15 
   5  -7 -20    2.72    0.25 
   6  -7 -20    3.05    0.22 
   7  -7 -20    1.82    0.16 
   8  -7 -20   21.40    0.78 
   9  -7 -20    0.15    0.09 
  10  -7 -20    8.50    0.30 
  11  -7 -20    0.50    0.09 
  12  -7 -20    0.25    0.06 
  -5  -6 -20    1.06    0.26 
  -4  -6 -20    2.80    0.49 
  -3  -6 -20    0.41    0.28 
  -2  -6 -20    0.16    0.27 
  -1  -6 -20    2.13    0.27 
   0  -6 -20   18.90    0.78 
   1  -6 -20   15.80    0.66 
   2  -6 -20    2.34    0.22 
   3  -6 -20   23.73    0.94 
   4  -6 -20    3.97    0.24 
   5  -6 -20    1.71    0.14 
   6  -6 -20   18.38    0.74 
   7  -6 -20   16.61    0.62 
   8  -6 -20    1.32    0.12 
   9  -6 -20    6.53    0.27 
  10  -6 -20    0.60    0.09 
  11  -6 -20    0.06    0.08 
  12  -6 -20    0.46    0.12 
  -5  -5 -20    2.81    0.48 
  -4  -5 -20    6.35    0.70 
  -3  -5 -20    0.93    0.16 
  -2  -5 -20    2.74    0.27 
  -1  -5 -20    2.18    0.24 
   0  -5 -20    3.24    0.23 
   1  -5 -20    8.22    0.43 
   2  -5 -20   24.20    1.39 
   3  -5 -20    3.77    0.27 
   4  -5 -20    0.77    0.13 
   5  -5 -20    2.95    0.20 
   6  -5 -20   17.28    0.62 
   7  -5 -20   37.77    1.24 
   8  -5 -20   14.09    0.51 
   9  -5 -20    1.11    0.11 
  10  -5 -20    2.82    0.19 
  11  -5 -20    1.63    0.17 
  12  -5 -20    0.08    0.10 
  -5  -4 -20    1.01    0.20 
  -4  -4 -20   15.98    0.83 
  -3  -4 -20    1.96    0.19 
  -2  -4 -20    3.14    0.31 
  -1  -4 -20    0.67    0.14 
   0  -4 -20    1.25    0.22 
   1  -4 -20    5.06    0.41 
   2  -4 -20    2.51    0.30 
   3  -4 -20    3.56    0.36 
   4  -4 -20    1.23    0.25 
   5  -4 -20    8.25    0.38 
   6  -4 -20    2.48    0.19 
   7  -4 -20    2.41    0.17 
   8  -4 -20   14.84    0.54 
   9  -4 -20    5.52    0.38 
  10  -4 -20    2.60    0.25 
  11  -4 -20    0.30    0.14 
  12  -4 -20    0.60    0.11 
  -6  -3 -20    6.70    0.52 
  -5  -3 -20   17.17    0.96 
  -4  -3 -20    1.43    0.20 
  -3  -3 -20   23.75    1.19 
  -2  -3 -20    2.68    0.80 
  -1  -3 -20    2.70    0.32 
   0  -3 -20    2.94    0.29 
   1  -3 -20    2.36    0.28 
   2  -3 -20    8.91    0.61 
   3  -3 -20    2.11    0.32 
   4  -3 -20    5.33    0.45 
   5  -3 -20   25.82    1.18 
   6  -3 -20   22.51    0.81 
   7  -3 -20    1.09    0.15 
   8  -3 -20    0.67    0.17 
   9  -3 -20    0.15    0.14 
  10  -3 -20    3.15    0.34 
  11  -3 -20    0.10    0.12 
  -6  -2 -20    1.21    0.23 
  -5  -2 -20   41.60    2.37 
  -4  -2 -20    3.55    0.35 
  -3  -2 -20   24.75    1.55 
  -2  -2 -20    2.60    0.71 
  -1  -2 -20    9.28    0.61 
   0  -2 -20   14.56    0.91 
   1  -2 -20   37.25    1.99 
   2  -2 -20   16.78    1.07 
   3  -2 -20    2.70    0.33 
   4  -2 -20    2.52    0.32 
   5  -2 -20    4.13    0.37 
   6  -2 -20    3.40    0.59 
   7  -2 -20    2.55    0.27 
  -7  -1 -20   20.99    1.30 
  -6  -1 -20   16.83    1.04 
  -5  -1 -20   14.92    1.03 
  -4  -1 -20   10.36    0.65 
  -1  -1 -20   33.77    2.34 
   0  -1 -20   35.61    1.85 
   1  -1 -20   32.45    2.17 
   2  -1 -20   35.90    2.34 
   3  -1 -20   10.20    0.69 
   6  -1 -20    1.72    0.37 
   7  -1 -20    2.21    0.50 
  -7   0 -20    1.64    0.26 
  -6   0 -20   20.39    1.23 
  -5   0 -20    3.00    0.38 
  -1   0 -20   30.73    2.17 
   0   0 -20  320.67   20.79 
   1   0 -20   32.86    2.16 
   5   0 -20    3.32    0.58 
   6   0 -20   17.33    1.72 
   7   0 -20    1.42    0.33 
   8   0 -20   13.09    1.34 
  -7   1 -20    2.52    0.38 
  -6   1 -20    1.52    0.26 
  -5   1 -20    0.44    0.20 
  -1   1 -20   30.31    2.16 
   0   1 -20   34.08    2.17 
   5   1 -20   14.95    1.46 
   6   1 -20   15.70    1.45 
   7   1 -20   18.68    1.81 
   8   1 -20    1.15    0.25 
  -7   2 -20    1.98    0.29 
  -6   2 -20    3.02    0.40 
   4   2 -20    3.63    0.56 
   5   2 -20   37.95    3.31 
   6   2 -20    0.88    0.30 
   7   2 -20    0.40    0.25 
   8   2 -20    0.29    0.19 
   9   2 -20    2.46    0.33 
  -7   3 -20    1.15    0.24 
  -6   3 -20   21.42    1.46 
   3   3 -20   22.28    2.06 
   4   3 -20    1.48    0.37 
   5   3 -20   17.32    1.38 
   6   3 -20    7.41    0.76 
   7   3 -20    7.96    0.81 
   8   3 -20    7.63    0.77 
  -6   4 -20    2.52    0.38 
   2   4 -20    2.64    0.55 
   3   4 -20    1.19    0.35 
   4   4 -20   16.08    1.47 
   5   4 -20    1.03    0.31 
   6   4 -20    0.30    0.24 
   7   4 -20    0.44    0.20 
   8   4 -20    3.39    0.39 
   0   5 -20    3.21    0.58 
   1   5 -20    2.24    0.39 
   2   5 -20    2.82    0.57 
   3   5 -20    0.59    0.30 
   4   5 -20    6.01    0.72 
   5   5 -20    2.73    0.50 
   6   5 -20    0.10    0.20 
   7   5 -20    0.21    0.15 
   1   6 -20    2.09    0.41 
   2   6 -20    0.25    0.27 
   3   6 -20    0.28    0.27 
   4   6 -20    3.31    0.50 
   5   6 -20    1.91    0.37 
   6   6 -20    0.30    0.17 
   1   7 -20    6.35    0.73 
   2   7 -20    1.54    0.33 
   3   7 -20    3.41    0.50 
   4   7 -20    0.30    0.20 
   5   7 -20    0.15    0.15 
   1   8 -20    0.45    0.26 
   2   8 -20    0.30    0.22 
   3   8 -20    0.34    0.19 
   4   8 -20    0.83    0.17 
   2   9 -20    0.42    0.17 
   3   9 -20    1.94    0.28 
   0 -11 -19    5.72    0.54 
   1 -11 -19    0.18    0.18 
   2 -11 -19    0.18    0.19 
   3 -11 -19    0.17    0.21 
   8 -11 -19    2.32    0.25 
   9 -11 -19    1.82    0.22 
  10 -11 -19    1.44    0.18 
  11 -11 -19    6.06    0.37 
  -2 -10 -19    4.90    0.48 
  -1 -10 -19    1.95    0.30 
   0 -10 -19    7.39    0.76 
   1 -10 -19    1.87    0.40 
   2 -10 -19    0.26    0.24 
   3 -10 -19    0.35    0.26 
   6 -10 -19    0.80    0.12 
   7 -10 -19    0.52    0.12 
   8 -10 -19    0.10    0.11 
   9 -10 -19    5.77    0.33 
  10 -10 -19    7.52    0.52 
  11 -10 -19    0.09    0.11 
  12 -10 -19    1.38    0.12 
  -3  -9 -19    0.56    0.19 
  -2  -9 -19    1.08    0.27 
  -1  -9 -19    7.59    0.70 
   0  -9 -19    0.14    0.26 
   1  -9 -19    1.46    0.33 
   2  -9 -19    1.72    0.36 
   3  -9 -19    0.15    0.25 
   4  -9 -19    5.29    0.37 
   5  -9 -19   14.27    0.69 
   6  -9 -19    3.93    0.28 
   7  -9 -19    0.48    0.14 
   8  -9 -19    1.91    0.18 
   9  -9 -19    0.17    0.09 
  10  -9 -19    1.86    0.13 
  11  -9 -19    0.19    0.08 
  12  -9 -19    0.56    0.07 
  -4  -8 -19   -0.06    0.18 
  -3  -8 -19    2.31    0.42 
  -2  -8 -19    0.25    0.26 
  -1  -8 -19    2.25    0.49 
   0  -8 -19    0.45    0.29 
   1  -8 -19    0.52    0.29 
   2  -8 -19    5.55    0.38 
   3  -8 -19   10.72    0.45 
   4  -8 -19    3.16    0.22 
   5  -8 -19   11.18    0.56 
   6  -8 -19   20.13    0.91 
   7  -8 -19    1.23    0.13 
   8  -8 -19    0.47    0.11 
   9  -8 -19    1.63    0.13 
  10  -8 -19    0.15    0.08 
  11  -8 -19    0.34    0.09 
  12  -8 -19    0.79    0.08 
  -5  -7 -19    0.50    0.20 
  -4  -7 -19    0.35    0.23 
  -3  -7 -19    0.43    0.27 
  -2  -7 -19    0.92    0.31 
  -1  -7 -19    0.82    0.32 
   0  -7 -19    1.01    0.32 
   1  -7 -19    0.58    0.11 
   2  -7 -19    1.55    0.15 
   3  -7 -19   29.91    1.24 
   4  -7 -19   23.51    0.88 
   5  -7 -19    7.84    0.40 
   6  -7 -19    0.96    0.14 
   7  -7 -19    1.42    0.14 
   8  -7 -19    0.79    0.13 
   9  -7 -19    2.30    0.17 
  10  -7 -19    0.66    0.10 
  11  -7 -19    0.03    0.09 
  12  -7 -19    0.86    0.09 
  -5  -6 -19    0.81    0.25 
  -4  -6 -19    0.55    0.29 
  -3  -6 -19    3.06    0.61 
  -2  -6 -19   19.81    1.77 
  -1  -6 -19    0.85    0.16 
   0  -6 -19    0.62    0.12 
   1  -6 -19    0.77    0.13 
   2  -6 -19   14.27    0.67 
   3  -6 -19   11.57    0.55 
   4  -6 -19   18.50    0.82 
   5  -6 -19    1.27    0.14 
   6  -6 -19    0.29    0.12 
   7  -6 -19    0.56    0.13 
   8  -6 -19    5.49    0.26 
   9  -6 -19    0.19    0.10 
  10  -6 -19   12.72    0.44 
  11  -6 -19    3.18    0.19 
  12  -6 -19    0.21    0.07 
  -5  -5 -19    0.75    0.29 
  -4  -5 -19   13.22    1.37 
  -3  -5 -19   12.47    0.64 
  -2  -5 -19    5.61    0.43 
  -1  -5 -19    1.03    0.13 
   0  -5 -19    2.25    0.30 
   1  -5 -19   17.49    1.00 
   2  -5 -19   16.62    1.02 
   3  -5 -19    5.62    0.41 
   4  -5 -19   15.17    1.06 
   5  -5 -19    2.66    0.25 
   6  -5 -19    1.07    0.13 
   7  -5 -19    1.80    0.14 
   8  -5 -19   10.41    0.38 
   9  -5 -19    5.19    0.26 
  10  -5 -19    1.10    0.10 
  11  -5 -19    0.50    0.13 
  12  -5 -19    0.27    0.13 
  -5  -4 -19    7.07    0.41 
  -4  -4 -19    2.11    0.26 
  -3  -4 -19   20.44    1.10 
  -2  -4 -19   17.48    0.99 
  -1  -4 -19   15.96    0.93 
   0  -4 -19    2.82    0.29 
   1  -4 -19    7.86    0.54 
   2  -4 -19    9.71    0.62 
   3  -4 -19   45.81    2.84 
   4  -4 -19    1.95    0.33 
   5  -4 -19   17.19    1.15 
   6  -4 -19   14.18    0.56 
   7  -4 -19   29.40    1.01 
   8  -4 -19    3.63    0.20 
   9  -4 -19   15.46    0.75 
  10  -4 -19    0.58    0.15 
  11  -4 -19    0.46    0.12 
  12  -4 -19    0.10    0.11 
  -6  -3 -19    0.29    0.19 
  -5  -3 -19    9.99    0.72 
  -4  -3 -19   35.00    1.57 
  -3  -3 -19   14.03    0.74 
  -2  -3 -19    3.85    1.02 
  -1  -3 -19   43.35    2.41 
   0  -3 -19    0.43    0.17 
   1  -3 -19   15.74    0.96 
   2  -3 -19    4.50    0.37 
   3  -3 -19    0.60    0.20 
   4  -3 -19    8.69    0.62 
   5  -3 -19   16.32    1.17 
   6  -3 -19   11.26    0.62 
   7  -3 -19   21.33    0.85 
   8  -3 -19   10.32    0.61 
   9  -3 -19    4.07    0.32 
  10  -3 -19    0.63    0.14 
  11  -3 -19    2.40    0.27 
  -7  -2 -19    2.85    0.36 
  -6  -2 -19    6.21    0.50 
  -5  -2 -19    2.42    0.34 
  -4  -2 -19   13.08    0.92 
  -3  -2 -19   18.96    2.13 
  -2  -2 -19   10.79    1.38 
  -1  -2 -19    4.16    0.36 
   0  -2 -19    2.28    0.26 
   1  -2 -19    6.60    0.53 
   2  -2 -19    2.74    0.29 
   3  -2 -19   16.56    1.12 
   4  -2 -19    9.05    0.70 
   5  -2 -19    5.08    0.45 
   6  -2 -19   17.10    1.23 
   7  -2 -19    7.48    0.45 
   8  -2 -19   19.81    1.37 
  -7  -1 -19    0.81    0.22 
  -6  -1 -19    0.44    0.22 
  -5  -1 -19    1.18    0.22 
  -2  -1 -19   17.10    1.12 
  -1  -1 -19    9.71    0.55 
   0  -1 -19   23.99    1.37 
   1  -1 -19   24.14    1.60 
   2  -1 -19    7.12    0.60 
   3  -1 -19    5.58    0.42 
   6  -1 -19    0.70    0.31 
   7  -1 -19    1.09    0.22 
  -7   0 -19    1.49    0.25 
  -6   0 -19    0.39    0.21 
  -1   0 -19   25.37    1.60 
   0   0 -19    0.01    0.14 
   1   0 -19   25.07    1.60 
   2   0 -19    1.43    0.26 
   6   0 -19    0.87    0.31 
   7   0 -19    1.33    0.32 
   8   0 -19    0.73    0.25 
  -7   1 -19    1.23    0.24 
  -6   1 -19    0.92    0.23 
  -1   1 -19   22.64    1.60 
   0   1 -19   22.19    1.59 
   5   1 -19    1.09    0.32 
   6   1 -19    0.44    0.28 
   7   1 -19    0.80    0.28 
   8   1 -19    1.18    0.29 
  -7   2 -19    7.20    0.57 
  -6   2 -19   14.44    1.12 
   5   2 -19    2.17    0.49 
   6   2 -19    5.79    0.71 
   7   2 -19    2.65    0.47 
   8   2 -19    0.24    0.21 
   9   2 -19    0.17    0.16 
  -7   3 -19   20.10    1.37 
  -6   3 -19   10.13    0.83 
   4   3 -19   32.36    2.71 
   5   3 -19    9.41    1.03 
   6   3 -19    0.15    0.28 
   7   3 -19    0.74    0.26 
   8   3 -19    0.39    0.19 
   9   3 -19    0.35    0.15 
   3   4 -19   20.16    1.93 
   4   4 -19    2.14    0.43 
   5   4 -19    7.27    0.74 
   6   4 -19   12.19    1.19 
   7   4 -19    0.23    0.20 
   8   4 -19    1.35    0.26 
   1   5 -19    0.80    0.33 
   2   5 -19    5.64    0.80 
   3   5 -19   12.33    1.14 
   4   5 -19   15.28    1.39 
   5   5 -19    0.86    0.29 
   6   5 -19    3.38    0.48 
   7   5 -19    0.76    0.19 
   1   6 -19    0.96    0.33 
   2   6 -19   19.13    1.77 
   3   6 -19    3.39    0.59 
   4   6 -19    0.58    0.28 
   5   6 -19    0.53    0.24 
   6   6 -19    0.37    0.18 
   1   7 -19    0.76    0.32 
   2   7 -19    1.05    0.31 
   3   7 -19    0.41    0.26 
   4   7 -19    0.31    0.22 
   5   7 -19    0.61    0.20 
   1   8 -19    1.78    0.34 
   2   8 -19    0.19    0.23 
   3   8 -19    2.28    0.40 
   4   8 -19   -0.07    0.16 
   1   9 -19    7.38    0.68 
   2   9 -19    1.68    0.33 
   3   9 -19    0.26    0.15 
   2 -12 -18    0.18    0.17 
  10 -12 -18    1.86    0.22 
   0 -11 -18    0.84    0.21 
   1 -11 -18   13.42    1.33 
   2 -11 -18    0.59    0.22 
   3 -11 -18    3.86    0.54 
   8 -11 -18    0.57    0.15 
   9 -11 -18    7.33    0.54 
  10 -11 -18   10.77    0.67 
  11 -11 -18    0.51    0.12 
  -2 -10 -18    3.09    0.36 
  -1 -10 -18    9.84    0.96 
   0 -10 -18   16.67    1.27 
   1 -10 -18    0.61    0.26 
   2 -10 -18    0.69    0.27 
   3 -10 -18    0.54    0.26 
   6 -10 -18   12.62    0.86 
   7 -10 -18    0.03    0.11 
   8 -10 -18    6.09    0.35 
   9 -10 -18    0.33    0.11 
  10 -10 -18   13.01    0.65 
  11 -10 -18   15.62    0.58 
  12 -10 -18    0.49    0.07 
  -3  -9 -18    1.64    0.35 
  -2  -9 -18    9.19    0.80 
  -1  -9 -18    0.57    0.27 
   0  -9 -18    1.62    0.33 
   1  -9 -18    1.04    0.31 
   2  -9 -18    0.00    0.27 
   3  -9 -18    3.60    0.59 
   4  -9 -18   22.85    1.46 
   5  -9 -18    3.04    0.25 
   6  -9 -18   23.70    1.14 
   7  -9 -18   16.66    0.75 
   8  -9 -18    0.29    0.11 
   9  -9 -18    1.28    0.12 
  10  -9 -18    0.76    0.10 
  11  -9 -18    0.68    0.10 
  12  -9 -18    0.46    0.08 
  -5  -8 -18    2.46    0.31 
  -4  -8 -18    0.60    0.23 
  -3  -8 -18    0.17    0.24 
  -2  -8 -18    7.01    0.76 
  -1  -8 -18    0.60    0.30 
   0  -8 -18    0.53    0.31 
   1  -8 -18   19.55    1.92 
   2  -8 -18    0.40    0.28 
   3  -8 -18    0.88    0.13 
   4  -8 -18   46.73    1.92 
   5  -8 -18   40.89    1.73 
   6  -8 -18    5.72    0.29 
   7  -8 -18    1.00    0.13 
   8  -8 -18    0.79    0.13 
   9  -8 -18    1.21    0.12 
  10  -8 -18    0.85    0.10 
  11  -8 -18    4.48    0.20 
  12  -8 -18    0.62    0.09 
  13  -8 -18    2.86    0.14 
  -6  -7 -18    0.25    0.16 
  -5  -7 -18    0.80    0.23 
  -4  -7 -18    0.67    0.27 
  -3  -7 -18    0.61    0.30 
  -2  -7 -18   14.83    1.47 
  -1  -7 -18    0.79    0.32 
   0  -7 -18   17.09    1.61 
   1  -7 -18    1.49    0.15 
   2  -7 -18    1.52    0.15 
   3  -7 -18    3.91    0.24 
   4  -7 -18   14.10    0.64 
   5  -7 -18   26.42    0.96 
   6  -7 -18    9.17    0.37 
   7  -7 -18   17.99    0.69 
   8  -7 -18   22.07    0.73 
   9  -7 -18    0.33    0.11 
  10  -7 -18    0.71    0.10 
  11  -7 -18    5.75    0.23 
  12  -7 -18    6.28    0.27 
  13  -7 -18    0.23    0.06 
  -6  -6 -18    0.40    0.22 
  -5  -6 -18    0.87    0.27 
  -4  -6 -18   11.45    1.24 
  -3  -6 -18   28.19    2.24 
  -2  -6 -18    3.53    0.68 
  -1  -6 -18    7.48    0.87 
   0  -6 -18    6.88    0.35 
   1  -6 -18    0.67    0.18 
   2  -6 -18    7.89    0.59 
   3  -6 -18   41.49    2.17 
   4  -6 -18    1.12    0.23 
   5  -6 -18   10.34    0.52 
   6  -6 -18    7.30    0.34 
   7  -6 -18    1.64    0.15 
   8  -6 -18    0.26    0.11 
   9  -6 -18    4.25    0.23 
  10  -6 -18    0.36    0.10 
  11  -6 -18    1.94    0.13 
  12  -6 -18    0.92    0.09 
  13  -6 -18    0.11    0.10 
  -5  -5 -18    8.29    0.86 
  -3  -5 -18   33.55    3.32 
  -2  -5 -18   25.21    1.29 
  -1  -5 -18    8.57    0.61 
   0  -5 -18    6.79    0.45 
   1  -5 -18   10.18    0.69 
   2  -5 -18    1.53    0.23 
   3  -5 -18  103.69    5.49 
   4  -5 -18   24.41    1.44 
   5  -5 -18    5.53    0.51 
   6  -5 -18    0.77    0.16 
   7  -5 -18    1.33    0.14 
   8  -5 -18    1.29    0.13 
   9  -5 -18   23.94    0.89 
  10  -5 -18    7.98    0.31 
  11  -5 -18    0.60    0.11 
  12  -5 -18    0.63    0.12 
  13  -5 -18    2.17    0.21 
  -5  -4 -18   21.46    2.07 
  -4  -4 -18   48.95    2.42 
  -3  -4 -18   16.83    0.80 
  -2  -4 -18    1.82    0.78 
  -1  -4 -18   19.74    1.23 
   0  -4 -18   72.46    3.85 
   1  -4 -18   10.18    0.69 
   2  -4 -18   33.82    1.80 
   3  -4 -18   30.40    1.76 
   4  -4 -18   72.56    4.54 
   5  -4 -18   12.77    0.80 
   6  -4 -18    9.01    0.68 
   7  -4 -18    3.98    0.23 
   8  -4 -18   49.16    1.57 
   9  -4 -18    3.88    0.20 
  10  -4 -18   13.92    0.68 
  11  -4 -18    1.01    0.15 
  12  -4 -18    0.77    0.14 
  -6  -3 -18    4.55    0.43 
  -5  -3 -18    1.56    0.23 
  -4  -3 -18    3.04    0.32 
  -3  -3 -18   36.48    4.21 
  -2  -3 -18  102.06   10.29 
  -1  -3 -18   32.94    1.77 
   0  -3 -18   33.78    1.88 
   1  -3 -18    0.51    0.16 
   2  -3 -18   70.89    3.92 
   3  -3 -18   34.06    2.21 
   4  -3 -18   11.03    0.79 
   5  -3 -18    2.13    0.32 
   6  -3 -18   38.38    2.54 
   7  -3 -18   14.35    0.75 
   8  -3 -18   38.73    1.82 
   9  -3 -18   25.25    1.21 
  10  -3 -18    0.44    0.15 
  11  -3 -18    0.67    0.16 
  12  -3 -18    1.90    0.21 
  -7  -2 -18    0.14    0.19 
  -6  -2 -18    0.33    0.21 
  -5  -2 -18    1.49    0.24 
  -4  -2 -18   11.40    1.50 
  -3  -2 -18    2.97    0.79 
  -2  -2 -18   30.77    1.80 
  -1  -2 -18   74.68    3.92 
   0  -2 -18    1.04    0.18 
   1  -2 -18    6.91    0.48 
   2  -2 -18    1.64    0.22 
   3  -2 -18    1.08    0.19 
   4  -2 -18   32.78    2.11 
   5  -2 -18   99.84    6.51 
   7  -2 -18   23.79    1.73 
   8  -2 -18    6.24    0.39 
   9  -2 -18   16.68    0.80 
  -7  -1 -18   23.92    1.38 
  -6  -1 -18    1.93    0.26 
  -2  -1 -18    0.30    0.15 
  -1  -1 -18    7.16    0.48 
   0  -1 -18    0.72    0.16 
   1  -1 -18    0.91    0.17 
   2  -1 -18    7.24    0.54 
   3  -1 -18   69.72    4.64 
   7  -1 -18    7.17    0.54 
  -7   0 -18   19.57    1.16 
  -6   0 -18    7.87    0.58 
  -2   0 -18    1.83    0.25 
  -1   0 -18    0.85    0.17 
   0   0 -18    9.82    0.62 
   1   0 -18    0.96    0.18 
   2   0 -18    1.59    0.25 
   7   0 -18   15.68    1.59 
   8   0 -18    0.88    0.28 
  -7   1 -18    7.82    0.61 
  -1   1 -18    0.86    0.17 
   0   1 -18    0.72    0.16 
   6   1 -18    1.57    0.36 
   7   1 -18   19.79    1.90 
   8   1 -18    1.28    0.29 
  -7   2 -18   22.91    1.59 
   5   2 -18    1.78    0.36 
   6   2 -18    0.19    0.28 
   7   2 -18    0.25    0.27 
   8   2 -18    0.51    0.23 
   9   2 -18    0.23    0.18 
  -7   3 -18   13.00    0.99 
   4   3 -18    2.34    0.57 
   5   3 -18    1.73    0.36 
   6   3 -18    4.96    0.64 
   7   3 -18    0.29    0.26 
   8   3 -18    5.07    0.53 
   9   3 -18    0.48    0.15 
  -7   4 -18    3.96    0.41 
   3   4 -18   16.27    1.43 
   4   4 -18   50.82    4.18 
   5   4 -18   22.42    2.08 
   6   4 -18    0.72    0.29 
   7   4 -18    6.10    0.64 
   8   4 -18    0.95    0.19 
   2   5 -18   24.13    2.25 
   3   5 -18   33.99    3.33 
   4   5 -18    1.93    0.45 
   5   5 -18    8.97    0.89 
   6   5 -18    1.46    0.31 
   7   5 -18    6.59    0.64 
   8   5 -18    2.69    0.33 
   1   6 -18    7.32    0.90 
   2   6 -18    3.53    0.70 
   3   6 -18   27.17    2.24 
   4   6 -18   12.72    1.26 
   5   6 -18    1.06    0.27 
   6   6 -18    0.65    0.22 
   7   6 -18    0.59    0.15 
   1   7 -18    0.71    0.33 
   2   7 -18   14.33    1.48 
   3   7 -18    0.54    0.28 
   4   7 -18    1.11    0.27 
   5   7 -18    0.98    0.23 
   6   7 -18    0.06    0.13 
   1   8 -18    0.43    0.28 
   2   8 -18    7.01    0.73 
   3   8 -18    0.19    0.22 
   4   8 -18    0.70    0.21 
   5   8 -18    2.10    0.30 
   1   9 -18    0.55    0.25 
   2   9 -18    8.33    0.77 
   3   9 -18    1.46    0.31 
   2  10 -18    2.76    0.32 
   1 -12 -17    3.48    0.42 
   2 -12 -17    4.49    0.51 
  10 -12 -17   10.84    0.64 
  11 -12 -17    2.89    0.23 
  -1 -11 -17    1.89    0.34 
   0 -11 -17   19.61    1.65 
   1 -11 -17    4.13    0.47 
   2 -11 -17    4.83    0.60 
   8 -11 -17    1.66    0.24 
   9 -11 -17    2.07    0.25 
  10 -11 -17    5.08    0.41 
  11 -11 -17   19.29    1.17 
  12 -11 -17    3.95    0.21 
  -2 -10 -17   10.36    0.92 
  -1 -10 -17    7.05    0.62 
   0 -10 -17    0.35    0.25 
   1 -10 -17    1.39    0.30 
   2 -10 -17    0.75    0.28 
   3 -10 -17    0.35    0.26 
   6 -10 -17    7.44    0.59 
   7 -10 -17   13.00    0.63 
   8 -10 -17    0.16    0.12 
   9 -10 -17    3.31    0.20 
  10 -10 -17    0.99    0.10 
  11 -10 -17    3.68    0.20 
  12 -10 -17    5.15    0.22 
  -4  -9 -17    0.97    0.20 
  -3  -9 -17    1.24    0.25 
  -2  -9 -17    1.26    0.31 
  -1  -9 -17    3.21    0.53 
   0  -9 -17    0.35    0.28 
   1  -9 -17    1.07    0.33 
   2  -9 -17    0.09    0.27 
   3  -9 -17    3.98    0.58 
   5  -9 -17   33.62    1.56 
   6  -9 -17   10.34    0.52 
   7  -9 -17    0.86    0.12 
   8  -9 -17    2.28    0.20 
   9  -9 -17    0.48    0.12 
  10  -9 -17    0.87    0.11 
  11  -9 -17    5.30    0.22 
  12  -9 -17    1.75    0.14 
  13  -9 -17    0.42    0.06 
  -5  -8 -17    0.30    0.18 
  -4  -8 -17    0.40    0.23 
  -3  -8 -17    1.65    0.33 
  -2  -8 -17    0.26    0.29 
  -1  -8 -17    2.64    0.55 
   0  -8 -17   14.73    1.46 
   1  -8 -17    2.09    0.38 
   2  -8 -17    1.28    0.33 
   3  -8 -17    8.95    0.39 
   4  -8 -17    0.55    0.14 
   5  -8 -17   10.92    0.56 
   6  -8 -17   12.00    0.50 
   7  -8 -17   17.90    0.71 
   8  -8 -17   15.79    0.62 
   9  -8 -17    1.29    0.13 
  10  -8 -17    0.81    0.11 
  11  -8 -17    3.63    0.18 
  12  -8 -17    3.23    0.18 
  13  -8 -17    1.36    0.11 
  -6  -7 -17    0.46    0.19 
  -5  -7 -17    1.69    0.39 
  -4  -7 -17    0.94    0.31 
  -3  -7 -17   13.21    1.27 
  -2  -7 -17    1.37    0.35 
  -1  -7 -17   17.61    1.66 
   0  -7 -17    3.07    0.54 
   1  -7 -17    4.33    0.65 
   2  -7 -17    0.85    0.20 
   3  -7 -17   21.01    1.26 
   4  -7 -17   28.80    1.50 
   5  -7 -17    1.00    0.13 
   6  -7 -17    0.18    0.12 
   7  -7 -17    2.44    0.21 
   8  -7 -17    2.07    0.15 
   9  -7 -17    0.30    0.11 
  10  -7 -17    0.15    0.10 
  11  -7 -17    0.07    0.09 
  12  -7 -17    0.22    0.09 
  13  -7 -17    2.17    0.14 
  -6  -6 -17    5.99    0.59 
  -5  -6 -17    5.25    0.71 
  -4  -6 -17    9.38    0.91 
  -3  -6 -17    8.36    1.05 
  -2  -6 -17   13.03    1.20 
  -1  -6 -17    0.38    0.29 
   0  -6 -17    0.55    0.17 
   1  -6 -17    0.28    0.16 
   2  -6 -17    6.83    0.43 
   3  -6 -17    7.82    0.56 
   4  -6 -17   43.29    2.31 
   5  -6 -17    3.15    0.35 
   6  -6 -17    0.48    0.22 
   7  -6 -17    4.68    0.27 
   8  -6 -17    1.33    0.13 
   9  -6 -17    4.07    0.22 
  10  -6 -17    4.43    0.22 
  11  -6 -17    1.11    0.10 
  12  -6 -17    4.83    0.25 
  13  -6 -17    0.30    0.09 
  -5  -5 -17    0.84    0.33 
  -4  -5 -17   33.21    3.03 
  -3  -5 -17   12.65    1.12 
  -2  -5 -17    0.74    0.69 
  -1  -5 -17    1.94    0.27 
   0  -5 -17   38.56    2.25 
   1  -5 -17    1.75    0.24 
   2  -5 -17   31.14    1.75 
   3  -5 -17    1.70    0.25 
   4  -5 -17   60.34    3.83 
   5  -5 -17   41.88    2.65 
   6  -5 -17    0.20    0.21 
   7  -5 -17    1.29    0.14 
   8  -5 -17    8.89    0.34 
   9  -5 -17    7.64    0.32 
  10  -5 -17    1.71    0.13 
  11  -5 -17    6.48    0.30 
  12  -5 -17    2.31    0.21 
  13  -5 -17    0.13    0.11 
  -5  -4 -17   10.03    0.91 
  -4  -4 -17    2.10    0.26 
  -3  -4 -17   22.54    3.05 
  -2  -4 -17   41.43    4.52 
  -1  -4 -17   60.51    3.25 
   0  -4 -17    0.68    0.17 
   1  -4 -17   31.41    1.63 
   2  -4 -17   19.00    1.11 
   3  -4 -17   36.63    1.98 
   4  -4 -17    0.53    0.20 
   5  -4 -17    1.56    0.23 
   6  -4 -17    4.86    0.46 
   7  -4 -17   21.36    1.06 
   8  -4 -17    1.15    0.14 
   9  -4 -17   35.62    1.14 
  10  -4 -17    8.41    0.48 
  11  -4 -17    1.78    0.20 
  12  -4 -17    0.23    0.14 
  13  -4 -17    0.88    0.16 
  -6  -3 -17    3.44    0.40 
  -5  -3 -17    7.89    0.63 
  -4  -3 -17   25.50    2.74 
  -3  -3 -17   10.69    1.49 
  -2  -3 -17    1.25    0.20 
  -1  -3 -17   35.03    1.99 
   0  -3 -17   22.51    1.20 
   1  -3 -17   13.72    0.86 
   2  -3 -17    0.52    0.15 
   3  -3 -17   20.22    1.40 
   4  -3 -17   26.93    1.89 
   5  -3 -17   30.69    2.05 
   6  -3 -17    7.93    0.64 
   7  -3 -17   27.89    1.75 
   8  -3 -17   10.85    0.62 
   9  -3 -17   10.45    0.58 
  10  -3 -17   13.37    0.69 
  11  -3 -17    1.53    0.17 
  12  -3 -17    0.65    0.14 
  -7  -2 -17    0.55    0.21 
  -6  -2 -17    1.54    0.24 
  -5  -2 -17    1.76    0.24 
  -4  -2 -17    4.61    1.17 
  -3  -2 -17   32.12    3.45 
  -2  -2 -17   20.21    1.13 
  -1  -2 -17    0.38    0.15 
   0  -2 -17   35.73    1.97 
   1  -2 -17    0.40    0.15 
   2  -2 -17   33.90    1.97 
   3  -2 -17   13.83    0.99 
   4  -2 -17   17.89    1.29 
   5  -2 -17    1.81    0.24 
   7  -2 -17    1.85    0.28 
   8  -2 -17   11.80    0.91 
   9  -2 -17    0.69    0.17 
  10  -2 -17    0.17    0.18 
  -7  -1 -17    1.55    0.26 
  -6  -1 -17    5.37    0.46 
  -3  -1 -17   28.40    3.15 
  -2  -1 -17   15.61    0.86 
  -1  -1 -17    0.44    0.14 
   0  -1 -17    4.29    0.32 
   1  -1 -17    3.59    0.32 
   2  -1 -17    0.54    0.16 
   3  -1 -17    0.63    0.17 
   8  -1 -17   17.85    1.29 
  -7   0 -17    2.54    0.39 
  -2   0 -17   35.34    2.32 
  -1   0 -17    4.69    0.33 
   0   0 -17    0.11    0.11 
   1   0 -17    4.22    0.36 
   2   0 -17   34.99    2.32 
   7   0 -17    1.49    0.35 
  -7   1 -17    0.53    0.21 
  -1   1 -17    3.64    0.34 
   6   1 -17    4.52    0.65 
   7   1 -17    1.39    0.35 
   8   1 -17    1.14    0.29 
  -7   2 -17    1.43    0.24 
   6   2 -17    1.47    0.34 
   7   2 -17    0.27    0.27 
   8   2 -17    0.63    0.26 
 -10   3 -17   13.14    0.98 
  -9   3 -17   11.63    0.85 
   5   3 -17    7.48    0.93 
   6   3 -17    3.31    0.62 
   7   3 -17    0.34    0.26 
   8   3 -17    2.99    0.47 
   9   3 -17    1.71    0.29 
 -10   4 -17    7.84    0.69 
  -9   4 -17   36.63    2.39 
   4   4 -17    1.64    0.37 
   5   4 -17    9.10    0.90 
   6   4 -17    4.85    0.64 
   7   4 -17    0.20    0.24 
   8   4 -17    3.03    0.40 
   9   4 -17    0.27    0.12 
 -10   5 -17    1.11    0.27 
  -9   5 -17    6.96    0.67 
   3   5 -17   11.85    1.15 
   4   5 -17   34.20    3.05 
   5   5 -17    0.90    0.33 
   6   5 -17    1.65    0.32 
   7   5 -17    0.32    0.20 
   8   5 -17    1.70    0.24 
 -10   6 -17    3.99    0.47 
  -9   6 -17    4.02    0.46 
   1   6 -17    0.22    0.31 
   2   6 -17   12.86    1.22 
   3   6 -17    8.84    1.07 
   4   6 -17   10.24    0.92 
   5   6 -17    6.47    0.73 
   6   6 -17    6.53    0.60 
   7   6 -17    2.35    0.33 
 -10   7 -17    0.24    0.23 
  -9   7 -17    0.23    0.24 
   1   7 -17   18.30    1.68 
   2   7 -17    0.82    0.32 
   3   7 -17   13.18    1.28 
   4   7 -17    1.18    0.31 
   5   7 -17    2.09    0.40 
   6   7 -17    0.47    0.16 
  -9   8 -17    1.57    0.29 
   1   8 -17    2.45    0.53 
   2   8 -17    0.16    0.26 
   3   8 -17    1.47    0.31 
   4   8 -17    0.19    0.20 
   5   8 -17    0.09    0.15 
  -9   9 -17    0.13    0.23 
   1   9 -17    3.44    0.51 
   2   9 -17    1.78    0.39 
   3   9 -17    1.61    0.32 
   4   9 -17    0.99    0.18 
   2  10 -17    9.78    0.90 
   1 -12 -16    1.61    0.28 
   2 -12 -16   -0.01    0.19 
  10 -12 -16    1.80    0.20 
  11 -12 -16    2.67    0.22 
  -1 -11 -16    3.46    0.36 
   0 -11 -16    0.38    0.23 
   1 -11 -16    0.35    0.22 
   2 -11 -16    2.54    0.48 
   8 -11 -16    0.08    0.15 
   9 -11 -16    1.13    0.13 
  10 -11 -16    5.68    0.40 
  11 -11 -16    0.61    0.11 
  12 -11 -16    1.08    0.12 
  -3 -10 -16    0.11    0.17 
  -2 -10 -16    1.24    0.27 
  -1 -10 -16    5.41    0.61 
   0 -10 -16    2.45    0.44 
   1 -10 -16    1.50    0.33 
   2 -10 -16    0.24    0.27 
   3 -10 -16    1.91    0.36 
   7 -10 -16    0.11    0.12 
   8 -10 -16    0.41    0.12 
   9 -10 -16    0.54    0.11 
  10 -10 -16    1.68    0.13 
  11 -10 -16    0.35    0.08 
  12 -10 -16    0.07    0.08 
  13 -10 -16    0.07    0.06 
  -4  -9 -16    1.16    0.23 
  -3  -9 -16   -0.08    0.23 
  -2  -9 -16    1.41    0.30 
  -1  -9 -16    0.62    0.30 
   0  -9 -16    0.54    0.30 
   1  -9 -16    1.18    0.33 
   2  -9 -16    0.04    0.27 
   3  -9 -16    4.10    0.61 
   5  -9 -16    4.33    0.30 
   6  -9 -16    2.00    0.21 
   7  -9 -16    5.40    0.29 
   8  -9 -16    5.90    0.28 
   9  -9 -16    0.19    0.10 
  10  -9 -16    1.30    0.12 
  11  -9 -16    3.33    0.18 
  12  -9 -16    0.50    0.09 
  13  -9 -16   -0.01    0.06 
  -5  -8 -16    0.11    0.19 
  -4  -8 -16    0.94    0.28 
  -3  -8 -16    0.44    0.28 
  -2  -8 -16    0.60    0.32 
  -1  -8 -16    4.87    0.70 
   0  -8 -16   12.22    1.12 
   1  -8 -16    1.44    0.34 
   2  -8 -16    0.94    0.30 
   3  -8 -16    2.37    0.30 
   4  -8 -16   23.59    1.11 
   5  -8 -16    2.34    0.24 
   6  -8 -16    0.19    0.12 
   7  -8 -16    0.44    0.13 
   8  -8 -16   11.13    0.47 
   9  -8 -16    0.96    0.12 
  10  -8 -16    0.55    0.11 
  11  -8 -16    3.60    0.19 
  12  -8 -16    1.99    0.17 
  13  -8 -16    1.19    0.11 
  -6  -7 -16    3.10    0.40 
  -5  -7 -16    0.58    0.25 
  -4  -7 -16    0.54    0.29 
  -3  -7 -16    0.18    0.30 
  -2  -7 -16    6.43    0.76 
  -1  -7 -16    1.22    0.34 
   0  -7 -16    0.52    0.30 
   1  -7 -16    3.62    0.95 
   2  -7 -16    7.93    0.51 
   3  -7 -16   16.22    0.90 
   4  -7 -16    4.02    0.40 
   5  -7 -16   21.12    1.30 
   6  -7 -16    5.22    0.35 
   7  -7 -16    0.36    0.13 
   8  -7 -16    1.61    0.14 
   9  -7 -16    0.18    0.11 
  10  -7 -16    2.20    0.16 
  11  -7 -16    0.42    0.10 
  12  -7 -16    0.47    0.08 
  13  -7 -16    0.38    0.07 
  -6  -6 -16    1.76    0.40 
  -5  -6 -16    0.59    0.29 
  -4  -6 -16    0.34    0.31 
  -3  -6 -16    1.88    0.39 
  -2  -6 -16    0.12    0.29 
  -1  -6 -16    5.00    1.16 
   0  -6 -16    1.85    0.27 
   1  -6 -16    3.73    0.32 
   2  -6 -16    2.25    0.28 
   3  -6 -16   12.30    0.69 
   4  -6 -16    1.86    0.26 
   5  -6 -16   13.70    0.95 
   6  -6 -16    2.42    0.36 
   7  -6 -16    4.32    0.31 
   8  -6 -16    0.70    0.13 
   9  -6 -16    4.51    0.23 
  10  -6 -16    2.95    0.20 
  11  -6 -16    0.11    0.09 
  12  -6 -16    1.66    0.15 
  13  -6 -16    2.87    0.21 
  -5  -5 -16    5.46    0.76 
  -4  -5 -16    5.69    0.69 
  -3  -5 -16    1.33    0.38 
  -2  -5 -16   17.52    2.39 
  -1  -5 -16   13.02    0.83 
   0  -5 -16    1.69    0.25 
   1  -5 -16    1.98    0.24 
   2  -5 -16    3.22    0.28 
   3  -5 -16    5.91    0.43 
   4  -5 -16    1.65    0.22 
   5  -5 -16    2.37    0.31 
   6  -5 -16    3.92    0.37 
   7  -5 -16    7.03    0.58 
   8  -5 -16    3.32    0.23 
   9  -5 -16    0.44    0.11 
  10  -5 -16    6.47    0.27 
  11  -5 -16    0.70    0.12 
  12  -5 -16    0.36    0.13 
  13  -5 -16    0.31    0.09 
  -5  -4 -16    0.78    0.32 
  -3  -4 -16    8.15    1.30 
  -2  -4 -16    0.59    0.68 
  -1  -4 -16    1.19    0.19 
   0  -4 -16   17.28    0.98 
   1  -4 -16    8.58    0.52 
   2  -4 -16    0.28    0.15 
   3  -4 -16    8.24    0.51 
   4  -4 -16   16.49    1.13 
   5  -4 -16    1.56    0.28 
   6  -4 -16    3.11    0.33 
   7  -4 -16   15.82    1.04 
   8  -4 -16   24.65    0.93 
   9  -4 -16    4.76    0.24 
  10  -4 -16    0.06    0.16 
  11  -4 -16    0.89    0.16 
  12  -4 -16    0.98    0.14 
  13  -4 -16    1.17    0.18 
  -5  -3 -16    4.53    0.39 
  -4  -3 -16   11.63    2.00 
  -3  -3 -16    9.40    1.58 
  -2  -3 -16    6.65    0.44 
  -1  -3 -16    7.58    0.51 
   0  -3 -16    2.94    0.28 
   1  -3 -16   31.40    1.80 
   2  -3 -16   14.16    0.92 
   3  -3 -16    3.26    0.28 
   4  -3 -16    7.93    0.59 
   5  -3 -16    2.47    0.31 
   6  -3 -16   10.49    0.78 
   7  -3 -16    5.56    0.44 
   8  -3 -16    2.68    0.40 
   9  -3 -16    1.75    0.22 
  10  -3 -16    0.03    0.15 
  11  -3 -16    0.10    0.14 
  12  -3 -16    0.04    0.13 
  13  -3 -16    0.01    0.09 
  -7  -2 -16    0.27    0.21 
  -6  -2 -16    0.72    0.22 
  -5  -2 -16    7.93    1.43 
  -4  -2 -16    5.05    1.08 
  -3  -2 -16    2.99    0.81 
  -2  -2 -16    0.73    0.16 
  -1  -2 -16   16.93    0.93 
   0  -2 -16    3.25    0.26 
   1  -2 -16   35.86    2.02 
   2  -2 -16    2.41    0.25 
   3  -2 -16   29.97    2.12 
   4  -2 -16    0.81    0.17 
   5  -2 -16    5.70    0.48 
   6  -2 -16    2.38    0.28 
   8  -2 -16    0.21    0.22 
   9  -2 -16    5.42    0.40 
  10  -2 -16    0.39    0.15 
  11  -2 -16    1.20    0.20 
  -7  -1 -16    1.33    0.25 
  -4  -1 -16    1.84    0.70 
  -3  -1 -16    7.74    1.18 
  -2  -1 -16   34.03    1.81 
  -1  -1 -16   35.47    2.02 
   0  -1 -16   10.62    1.33 
   1  -1 -16    9.91    1.29 
   3  -1 -16   14.86    1.06 
   4  -1 -16    7.89    0.57 
   8  -1 -16    0.57    0.28 
   9  -1 -16    5.47    0.55 
  -9   0 -16    0.23    0.21 
  -7   0 -16    0.29    0.22 
  -2   0 -16    2.39    0.24 
  -1   0 -16   12.47    1.34 
   0   0 -16   86.51    8.62 
   7   0 -16    0.13    0.30 
  -9   1 -16    5.58    0.50 
  -8   1 -16    0.62    0.25 
   7   1 -16    0.69    0.31 
   8   1 -16    0.99    0.29 
 -10   2 -16    0.41    0.22 
  -9   2 -16    5.62    0.55 
  -8   2 -16    0.43    0.25 
   6   2 -16    0.58    0.31 
   7   2 -16    0.28    0.28 
   8   2 -16    0.55    0.26 
 -10   3 -16    0.32    0.23 
  -9   3 -16    1.77    0.32 
  -8   3 -16    3.10    0.40 
   5   3 -16    4.36    0.63 
   6   3 -16    3.31    0.63 
   7   3 -16    2.53    0.51 
   8   3 -16    3.06    0.48 
   9   3 -16    0.76    0.19 
 -10   4 -16    0.30    0.24 
  -9   4 -16    4.84    0.51 
  -8   4 -16   24.32    1.71 
   4   4 -16   23.88    2.19 
   5   4 -16    0.84    0.32 
   6   4 -16    3.84    0.58 
   7   4 -16    0.22    0.26 
   8   4 -16    2.18    0.36 
   9   4 -16    0.08    0.13 
 -10   5 -16    6.12    0.57 
  -9   5 -16    0.30    0.26 
  -8   5 -16    3.80    0.44 
  -7   5 -16    6.73    0.62 
   3   5 -16    1.80    0.44 
   4   5 -16    4.95    0.70 
   5   5 -16    6.52    0.77 
   6   5 -16    0.02    0.26 
   7   5 -16    0.12    0.21 
   8   5 -16    1.31    0.27 
 -10   6 -16    3.15    0.42 
  -9   6 -16    4.53    0.49 
  -8   6 -16    0.55    0.26 
  -7   6 -16    3.95    0.46 
   2   6 -16    0.06    0.33 
   3   6 -16    1.96    0.42 
   4   6 -16    0.02    0.31 
   5   6 -16    0.65    0.30 
   6   6 -16    1.89    0.41 
   7   6 -16    0.18    0.16 
 -10   7 -16    2.08    0.37 
  -9   7 -16    0.27    0.24 
  -8   7 -16    1.25    0.29 
  -7   7 -16    0.44    0.25 
   1   7 -16    0.80    0.36 
   2   7 -16    6.54    0.78 
   3   7 -16   -0.25    0.29 
   4   7 -16    0.91    0.30 
   5   7 -16    0.49    0.24 
   6   7 -16    3.21    0.39 
 -10   8 -16    0.57    0.24 
  -9   8 -16    1.12    0.28 
  -8   8 -16   10.01    0.85 
  -7   8 -16    0.43    0.25 
   1   8 -16    4.34    0.71 
   2   8 -16    0.16    0.28 
   3   8 -16    0.42    0.27 
   4   8 -16    1.00    0.26 
   5   8 -16    0.26    0.17 
  -9   9 -16    0.04    0.23 
  -8   9 -16    5.15    0.52 
  -7   9 -16    5.17    0.53 
   1   9 -16    0.65    0.29 
   2   9 -16    1.09    0.28 
   3   9 -16   -0.03    0.20 
   4   9 -16    1.34    0.27 
  -8  10 -16    0.14    0.23 
  -7  10 -16   -0.15    0.24 
   1  10 -16    5.42    0.59 
   2  10 -16    1.45    0.32 
   3  10 -16    0.07    0.14 
   0 -12 -15    5.18    0.56 
   1 -12 -15    0.29    0.18 
   2 -12 -15    1.52    0.33 
  11 -12 -15    6.07    0.40 
  12 -12 -15    5.64    0.29 
  -2 -11 -15    3.46    0.42 
  -1 -11 -15    6.07    0.60 
   0 -11 -15    0.05    0.22 
   1 -11 -15    0.00    0.22 
   2 -11 -15    9.29    0.86 
   9 -11 -15    0.11    0.10 
  10 -11 -15    1.11    0.13 
  11 -11 -15    0.38    0.11 
  12 -11 -15    0.13    0.09 
  13 -11 -15    0.04    0.07 
  -3 -10 -15    0.82    0.21 
  -2 -10 -15    0.13    0.23 
  -1 -10 -15    0.92    0.29 
   0 -10 -15    2.78    0.50 
   1 -10 -15    2.31    0.50 
   2 -10 -15    0.22    0.27 
   7 -10 -15    4.09    0.27 
   8 -10 -15    4.44    0.25 
   9 -10 -15   -0.02    0.10 
  10 -10 -15    2.64    0.17 
  11 -10 -15   -0.09    0.08 
  12 -10 -15    1.61    0.15 
  13 -10 -15    1.99    0.13 
  -4  -9 -15    2.82    0.39 
  -3  -9 -15    0.63    0.27 
  -2  -9 -15    0.31    0.27 
  -1  -9 -15    0.51    0.30 
   0  -9 -15    0.12    0.30 
   1  -9 -15   10.70    1.03 
   2  -9 -15    1.31    0.33 
   3  -9 -15    5.52    0.77 
   5  -9 -15    2.93    0.34 
   6  -9 -15    4.19    0.28 
   7  -9 -15    2.47    0.21 
   8  -9 -15    3.49    0.23 
   9  -9 -15    0.32    0.11 
  10  -9 -15    2.28    0.17 
  11  -9 -15    8.27    0.33 
  12  -9 -15   11.64    0.40 
  13  -9 -15    1.51    0.14 
  -6  -8 -15    5.11    0.47 
  -5  -8 -15    8.17    0.72 
  -3  -8 -15    1.24    0.34 
  -2  -8 -15    5.36    0.69 
  -1  -8 -15    4.43    0.63 
   0  -8 -15    0.49    0.31 
   1  -8 -15    2.90    0.57 
   2  -8 -15   30.83    3.66 
   3  -8 -15   43.40    4.32 
   4  -8 -15    3.92    0.33 
   5  -8 -15   16.15    1.14 
   6  -8 -15    0.14    0.11 
   7  -8 -15    0.71    0.13 
   8  -8 -15    0.36    0.12 
   9  -8 -15   10.91    0.39 
  10  -8 -15    0.00    0.11 
  11  -8 -15    0.52    0.10 
  12  -8 -15    8.34    0.29 
  13  -8 -15    6.22    0.26 
  14  -8 -15    2.05    0.11 
  -6  -7 -15    0.43    0.22 
  -5  -7 -15    0.76    0.29 
  -4  -7 -15   14.06    1.29 
  -3  -7 -15    4.60    0.67 
  -2  -7 -15    2.54    0.55 
  -1  -7 -15    1.08    0.33 
   0  -7 -15    0.44    0.61 
   1  -7 -15   22.95    2.41 
   2  -7 -15    7.31    0.48 
   3  -7 -15    5.78    0.48 
   4  -7 -15   10.66    0.62 
   5  -7 -15    5.51    0.45 
   6  -7 -15    1.51    0.25 
   7  -7 -15    0.42    0.16 
   8  -7 -15    2.47    0.22 
   9  -7 -15    1.03    0.13 
  10  -7 -15    3.13    0.20 
  11  -7 -15    2.45    0.18 
  12  -7 -15    3.35    0.21 
  13  -7 -15    0.27    0.08 
  14  -7 -15    0.24    0.08 
  -6  -6 -15    2.60    0.46 
  -5  -6 -15   10.07    0.93 
  -4  -6 -15    0.30    0.32 
  -3  -6 -15    4.31    0.66 
  -1  -6 -15    0.47    0.64 
   0  -6 -15    5.62    1.16 
   1  -6 -15   10.56    0.70 
   2  -6 -15   31.15    1.66 
   3  -6 -15    3.56    0.30 
   4  -6 -15    0.20    0.17 
   5  -6 -15    0.03    0.19 
   6  -6 -15    5.32    0.49 
   7  -6 -15   20.71    1.36 
   8  -6 -15   33.23    1.27 
   9  -6 -15    6.97    0.30 
  10  -6 -15    0.13    0.11 
  11  -6 -15    1.86    0.16 
  12  -6 -15    2.44    0.15 
  13  -6 -15    0.68    0.08 
  14  -6 -15    4.32    0.34 
  -6  -5 -15    2.27    0.51 
  -5  -5 -15    5.16    0.71 
  -4  -5 -15    4.02    0.60 
  -3  -5 -15   15.43    2.22 
  -2  -5 -15    6.74    1.25 
  -1  -5 -15    0.29    0.15 
   0  -5 -15    4.56    0.36 
   1  -5 -15    0.40    0.15 
   2  -5 -15   21.78    1.16 
   3  -5 -15    3.51    0.28 
   4  -5 -15   16.11    0.94 
   5  -5 -15    5.30    0.43 
   6  -5 -15   11.37    0.81 
   7  -5 -15    8.06    0.55 
   8  -5 -15   41.95    1.91 
   9  -5 -15    2.98    0.19 
  10  -5 -15    5.25    0.25 
  11  -5 -15    8.66    0.33 
  12  -5 -15    1.26    0.16 
  13  -5 -15    6.73    0.38 
  -5  -4 -15    2.75    0.59 
  -4  -4 -15    1.98    0.94 
  -3  -4 -15    7.90    1.53 
  -2  -4 -15    0.10    0.61 
  -1  -4 -15   16.10    0.95 
   0  -4 -15   11.50    0.68 
   1  -4 -15    0.65    0.15 
   2  -4 -15   12.11    0.72 
   3  -4 -15    0.51    0.15 
   4  -4 -15   11.25    0.78 
   5  -4 -15    0.35    0.16 
   6  -4 -15   28.03    1.95 
   7  -4 -15    6.91    0.55 
   8  -4 -15    4.33    0.37 
   9  -4 -15    2.58    0.19 
  10  -4 -15    0.29    0.17 
  11  -4 -15   13.53    0.69 
  12  -4 -15    2.82    0.24 
  13  -4 -15    2.72    0.27 
  -4  -3 -15    9.30    1.44 
  -3  -3 -15    2.29    0.83 
  -2  -3 -15    2.65    0.28 
  -1  -3 -15    0.26    0.14 
   0  -3 -15   20.83    1.21 
   1  -3 -15   10.25    0.60 
   2  -3 -15    0.31    0.14 
   3  -3 -15   21.46    1.21 
   4  -3 -15    0.84    0.18 
   5  -3 -15   20.85    1.35 
   6  -3 -15    3.76    0.34 
   7  -3 -15    9.53    0.69 
   8  -3 -15   17.57    0.83 
   9  -3 -15    3.81    0.35 
  10  -3 -15    3.68    0.34 
  11  -3 -15    1.44    0.17 
  12  -3 -15    0.75    0.17 
  13  -3 -15    0.75    0.12 
  -8  -2 -15    0.16    0.22 
  -7  -2 -15    0.90    0.23 
  -6  -2 -15   35.66    2.10 
  -4  -2 -15   28.76    3.35 
  -3  -2 -15   18.01    2.37 
  -2  -2 -15   12.04    0.72 
  -1  -2 -15    0.37    0.14 
   0  -2 -15   27.39    3.05 
   1  -2 -15    0.29    0.37 
   2  -2 -15   32.21    3.04 
   4  -2 -15   11.79    0.82 
   5  -2 -15    3.57    0.31 
   6  -2 -15    0.15    0.17 
   8  -2 -15   -0.12    0.22 
   9  -2 -15    2.72    0.28 
  10  -2 -15    5.24    0.35 
  11  -2 -15    0.19    0.18 
  12  -2 -15    0.33    0.14 
  -9  -1 -15    2.11    0.33 
  -8  -1 -15    9.29    0.78 
  -7  -1 -15    4.02    0.29 
  -5  -1 -15   12.26    1.67 
  -4  -1 -15    0.67    0.58 
  -3  -1 -15    0.23    0.46 
  -2  -1 -15    9.77    0.60 
  -1  -1 -15    0.09    0.34 
   0  -1 -15   67.44    7.03 
   1  -1 -15   69.32    7.02 
   9  -1 -15    3.01    0.50 
  -9   0 -15    0.17    0.21 
  -8   0 -15    0.45    0.24 
  -7   0 -15    0.32    0.23 
  -3   0 -15   21.72    2.37 
  -2   0 -15   28.67    3.04 
  -1   0 -15   70.35    7.02 
   0   0 -15    0.02    0.29 
 -10   1 -15    0.19    0.20 
  -9   1 -15    2.86    0.40 
  -8   1 -15    0.79    0.27 
  -7   1 -15    1.25    0.28 
   7   1 -15    3.23    0.55 
   8   1 -15    8.20    1.01 
 -10   2 -15    4.86    0.47 
  -9   2 -15    2.80    0.39 
  -8   2 -15    0.17    0.24 
  -7   2 -15    3.87    0.49 
   7   2 -15    0.84    0.31 
   8   2 -15   -0.02    0.24 
 -10   3 -15    4.40    0.45 
  -9   3 -15    4.00    0.47 
  -8   3 -15   15.76    1.21 
  -7   3 -15    9.34    0.74 
   6   3 -15    7.66    0.82 
   7   3 -15    3.20    0.55 
   8   3 -15    0.22    0.24 
   9   3 -15   11.63    1.04 
 -11   4 -15   13.70    0.99 
 -10   4 -15    0.35    0.25 
  -9   4 -15    3.33    0.43 
  -8   4 -15    3.64    0.43 
  -7   4 -15    6.63    0.59 
  -6   4 -15   27.03    2.01 
   5   4 -15    2.58    0.47 
   6   4 -15    0.11    0.29 
   7   4 -15    2.62    0.50 
   8   4 -15    6.16    0.77 
   9   4 -15    1.91    0.28 
 -11   5 -15    8.64    0.71 
 -10   5 -15    5.26    0.54 
  -9   5 -15    2.90    0.42 
  -8   5 -15   38.87    2.76 
  -7   5 -15    6.25    0.58 
  -6   5 -15   10.49    0.85 
   4   5 -15    3.42    0.65 
   5   5 -15    6.08    0.75 
   6   5 -15    2.38    0.52 
   7   5 -15    4.61    0.52 
   8   5 -15    5.89    0.59 
 -11   6 -15    1.94    0.32 
 -10   6 -15    0.28    0.25 
  -9   6 -15    6.69    0.62 
  -8   6 -15   32.81    2.31 
  -7   6 -15   18.97    1.41 
  -6   6 -15    5.71    0.54 
   3   6 -15    3.85    0.68 
   4   6 -15    0.35    0.33 
   5   6 -15   10.29    0.96 
   6   6 -15    2.65    0.47 
   7   6 -15    0.22    0.18 
   8   6 -15    1.82    0.26 
 -11   7 -15    2.25    0.38 
 -10   7 -15    3.17    0.41 
  -9   7 -15    0.96    0.28 
  -8   7 -15    2.56    0.41 
  -7   7 -15    0.38    0.24 
  -6   7 -15    0.89    0.28 
   1   7 -15    0.69    0.36 
   2   7 -15    2.55    0.46 
   3   7 -15    3.72    0.66 
   4   7 -15   14.88    1.30 
   5   7 -15    1.03    0.29 
   6   7 -15    0.42    0.21 
   7   7 -15    0.20    0.13 
 -10   8 -15    0.07    0.23 
  -9   8 -15    9.51    0.79 
  -8   8 -15    0.28    0.25 
  -7   8 -15    0.75    0.26 
  -6   8 -15   -0.10    0.23 
   1   8 -15    3.58    0.63 
   2   8 -15    4.80    0.69 
   3   8 -15    1.02    0.33 
   5   8 -15    8.32    0.72 
   6   8 -15    5.04    0.46 
 -10   9 -15    2.21    0.37 
  -9   9 -15    0.26    0.24 
  -8   9 -15    2.99    0.43 
  -7   9 -15    2.38    0.36 
  -6   9 -15    3.97    0.47 
   1   9 -15    0.10    0.29 
   2   9 -15    0.16    0.25 
   3   9 -15    0.55    0.24 
   4   9 -15    2.68    0.38 
  -9  10 -15   -0.07    0.23 
  -8  10 -15    4.13    0.48 
  -7  10 -15    3.69    0.45 
  -6  10 -15    0.12    0.25 
   1  10 -15    0.98    0.27 
   2  10 -15    0.13    0.19 
   3  10 -15    0.80    0.18 
  -7  11 -15   11.39    0.99 
  -6  11 -15    7.30    0.71 
   0 -12 -14    0.68    0.21 
   1 -12 -14    2.48    0.38 
   2 -12 -14    6.54    0.76 
  11 -12 -14    4.85    0.37 
  12 -12 -14    1.37    0.14 
  -2 -11 -14    0.37    0.19 
  -1 -11 -14    4.40    0.56 
   0 -11 -14    3.53    0.48 
   1 -11 -14    0.77    0.27 
   2 -11 -14    0.08    0.25 
   9 -11 -14    1.65    0.17 
  10 -11 -14    0.78    0.13 
  11 -11 -14    3.27    0.25 
  12 -11 -14    2.87    0.21 
  13 -11 -14    0.14    0.08 
  -3 -10 -14    0.07    0.20 
  -2 -10 -14    0.62    0.26 
  -1 -10 -14    1.45    0.30 
   0 -10 -14    2.26    0.50 
   1 -10 -14    0.91    0.31 
   2 -10 -14    0.40    0.28 
   7 -10 -14    2.74    0.24 
   8 -10 -14    1.91    0.22 
   9 -10 -14    5.84    0.28 
  10 -10 -14    2.39    0.17 
  11 -10 -14    1.04    0.10 
  12 -10 -14    8.08    0.33 
  13 -10 -14    2.47    0.15 
  -5  -9 -14    1.28    0.26 
  -4  -9 -14   -0.08    0.21 
  -3  -9 -14    0.01    0.26 
  -2  -9 -14    2.36    0.51 
  -1  -9 -14    6.42    0.74 
   0  -9 -14    1.04    0.35 
   1  -9 -14    7.76    0.91 
   2  -9 -14    8.06    0.93 
   6  -9 -14    0.39    0.11 
   7  -9 -14    9.77    0.41 
   8  -9 -14    3.11    0.22 
   9  -9 -14    1.26    0.13 
  10  -9 -14    0.72    0.11 
  11  -9 -14    0.13    0.10 
  12  -9 -14    4.50    0.19 
  13  -9 -14   12.07    0.46 
  14  -9 -14    0.06    0.06 
  -6  -8 -14    0.52    0.18 
  -5  -8 -14    6.38    0.71 
  -4  -8 -14    9.14    0.98 
  -3  -8 -14    6.05    0.74 
  -2  -8 -14    1.70    0.40 
  -1  -8 -14    3.35    0.61 
   0  -8 -14    6.32    0.72 
   1  -8 -14   25.65    2.85 
   2  -8 -14   22.93    2.44 
   3  -8 -14    1.41    0.59 
   4  -8 -14    7.32    0.49 
   5  -8 -14   16.78    1.04 
   6  -8 -14    2.63    0.34 
   7  -8 -14    6.98    0.33 
   8  -8 -14    5.96    0.30 
   9  -8 -14    8.90    0.34 
  10  -8 -14    0.38    0.11 
  11  -8 -14    7.50    0.30 
  12  -8 -14   18.59    0.61 
  13  -8 -14    1.63    0.13 
  14  -8 -14    1.31    0.10 
  -6  -7 -14    0.31    0.23 
  -5  -7 -14   19.11    1.71 
  -3  -7 -14    1.81    0.44 
  -2  -7 -14    9.24    1.01 
   0  -7 -14    0.45    0.60 
   1  -7 -14   27.59    3.29 
   2  -7 -14   60.30    6.29 
   3  -7 -14   11.00    0.66 
   4  -7 -14    0.66    0.18 
   5  -7 -14   20.81    1.40 
   6  -7 -14    2.01    0.32 
   7  -7 -14    0.74    0.23 
   8  -7 -14   24.44    0.94 
   9  -7 -14    9.41    0.35 
  10  -7 -14    0.01    0.11 
  11  -7 -14    5.30    0.24 
  12  -7 -14   20.36    0.67 
  13  -7 -14    1.03    0.10 
  14  -7 -14    0.04    0.06 
  -6  -6 -14    4.95    0.59 
  -4  -6 -14   22.33    1.96 
  -3  -6 -14    1.41    0.36 
  -2  -6 -14    1.86    0.83 
  -1  -6 -14    1.44    0.78 
   0  -6 -14    0.10    0.55 
   1  -6 -14   10.75    0.68 
   2  -6 -14    1.62    0.22 
   3  -6 -14    0.17    0.15 
   4  -6 -14    1.11    0.19 
   5  -6 -14    6.60    0.50 
   6  -6 -14    0.38    0.21 
   7  -6 -14   31.46    1.97 
   8  -6 -14   23.41    1.41 
   9  -6 -14    5.86    0.29 
  10  -6 -14    8.35    0.33 
  11  -6 -14    2.45    0.17 
  12  -6 -14    4.19    0.20 
  13  -6 -14    0.24    0.08 
  14  -6 -14    0.93    0.10 
  -6  -5 -14    1.90    0.40 
  -5  -5 -14   10.47    0.94 
  -4  -5 -14    2.13    0.43 
  -3  -5 -14   21.31    2.43 
  -2  -5 -14   22.81    2.61 
  -1  -5 -14    6.11    0.44 
   0  -5 -14    0.32    0.14 
   1  -5 -14   11.16    0.62 
   2  -5 -14   20.55    1.24 
   3  -5 -14   27.35    1.47 
   4  -5 -14   36.37    1.85 
   5  -5 -14    0.48    0.19 
   6  -5 -14   11.32    0.79 
   7  -5 -14   60.58    3.95 
   8  -5 -14    2.83    0.34 
   9  -5 -14    0.18    0.12 
  10  -5 -14    8.46    0.34 
  11  -5 -14    2.68    0.17 
  12  -5 -14   18.81    0.73 
  13  -5 -14    6.97    0.38 
  14  -5 -14    0.72    0.12 
  -5  -4 -14    0.20    0.31 
  -4  -4 -14    6.21    1.43 
  -3  -4 -14    1.06    0.77 
  -2  -4 -14    1.41    0.21 
  -1  -4 -14   32.72    1.86 
   0  -4 -14   14.21    0.75 
   1  -4 -14   16.72    0.95 
   2  -4 -14   50.58    2.64 
   3  -4 -14    5.39    0.38 
   4  -4 -14   11.69    0.85 
   5  -4 -14   11.21    0.72 
   6  -4 -14    1.52    0.23 
   7  -4 -14   11.93    0.77 
   8  -4 -14    7.50    0.56 
   9  -4 -14    2.64    0.21 
  10  -4 -14   21.91    0.85 
  11  -4 -14    5.07    0.36 
  12  -4 -14    9.96    0.52 
  13  -4 -14    0.23    0.14 
  -8  -3 -14    7.45    0.60 
  -7  -3 -14    0.15    0.22 
  -6  -3 -14    5.65    0.55 
  -5  -3 -14    4.63    1.17 
  -4  -3 -14    8.65    1.65 
  -3  -3 -14    0.37    0.61 
  -2  -3 -14   26.61    1.48 
  -1  -3 -14    7.23    1.04 
   0  -3 -14   62.28    6.01 
   1  -3 -14    5.35    0.89 
   2  -3 -14   14.49    1.53 
   3  -3 -14   62.11    5.94 
   4  -3 -14   15.34    1.09 
   5  -3 -14   21.21    1.46 
   6  -3 -14    0.51    0.18 
   7  -3 -14    0.99    0.21 
   8  -3 -14   18.98    1.21 
   9  -3 -14    0.57    0.23 
  10  -3 -14    3.51    0.32 
  11  -3 -14    6.30    0.39 
  12  -3 -14    0.17    0.12 
  13  -3 -14    0.10    0.11 
  -8  -2 -14    0.32    0.23 
  -7  -2 -14    8.61    0.71 
  -6  -2 -14   19.49    1.28 
  -5  -2 -14   65.28    6.50 
  -4  -2 -14    1.53    0.76 
  -3  -2 -14   26.40    2.63 
  -2  -2 -14   47.90    5.02 
  -1  -2 -14   13.74    1.58 
   0  -2 -14    0.09    0.34 
   1  -2 -14   12.63    1.34 
   2  -2 -14    0.13    0.30 
   5  -2 -14   25.35    1.71 
   6  -2 -14    1.18    0.20 
   9  -2 -14   10.52    0.56 
  10  -2 -14    1.98    0.21 
  11  -2 -14    2.02    0.22 
  12  -2 -14    0.49    0.15 
  -9  -1 -14    0.39    0.21 
  -8  -1 -14    8.19    0.69 
  -7  -1 -14   24.56    1.15 
  -6  -1 -14   29.86    2.05 
  -5  -1 -14   10.81    1.64 
  -4  -1 -14    8.20    1.40 
  -3  -1 -14   16.08    1.93 
  -2  -1 -14    6.89    0.96 
  -1  -1 -14   10.03    1.33 
   0  -1 -14   58.78    5.98 
   1  -1 -14   59.68    5.97 
   9  -1 -14    2.69    0.37 
  -9   0 -14    1.88    0.33 
  -8   0 -14    5.34    0.53 
  -7   0 -14    0.75    0.25 
  -6   0 -14    0.48    0.22 
  -4   0 -14   11.59    1.57 
  -3   0 -14   57.33    5.97 
  -2   0 -14   -0.22    0.32 
  -1   0 -14   56.49    5.97 
   0   0 -14  367.26   36.02 
 -10   1 -14    4.82    0.51 
  -9   1 -14    2.34    0.38 
  -8   1 -14    7.23    0.61 
  -7   1 -14    2.74    0.37 
  -6   1 -14    5.83    0.53 
  -1   1 -14   63.52    5.95 
 -10   2 -14    2.14    0.36 
  -9   2 -14   10.07    0.77 
  -8   2 -14    2.03    0.32 
  -7   2 -14   19.94    1.47 
  -6   2 -14    0.94    0.23 
   7   2 -14    8.24    0.94 
   8   2 -14    0.08    0.26 
 -11   3 -14    6.03    0.55 
 -10   3 -14    3.58    0.42 
  -9   3 -14    0.69    0.26 
  -8   3 -14   16.98    1.27 
  -7   3 -14    0.75    0.23 
  -6   3 -14    0.09    0.18 
   6   3 -14    5.57    0.75 
   7   3 -14   -0.03    0.27 
   8   3 -14    6.86    0.78 
   9   3 -14    2.85    0.48 
 -11   4 -14    4.90    0.49 
 -10   4 -14   21.66    1.53 
  -9   4 -14    2.59    0.42 
  -8   4 -14    6.31    0.61 
  -7   4 -14   10.70    0.81 
  -6   4 -14    1.42    0.25 
  -5   4 -14    9.64    0.74 
   5   4 -14    0.10    0.32 
   6   4 -14    8.96    0.93 
   7   4 -14    4.11    0.66 
   8   4 -14   20.26    1.62 
   9   4 -14   10.97    1.04 
 -11   5 -14    3.02    0.41 
 -10   5 -14    8.70    0.71 
  -9   5 -14   -0.01    0.25 
  -8   5 -14    2.45    0.39 
  -7   5 -14   58.98    4.07 
  -6   5 -14   10.44    0.82 
  -5   5 -14    0.19    0.20 
   4   5 -14    2.47    0.47 
   5   5 -14    9.72    0.97 
   6   5 -14    2.60    0.56 
   7   5 -14   21.22    1.80 
   8   5 -14    0.86    0.22 
   9   5 -14    0.11    0.11 
 -11   6 -14    2.61    0.40 
 -10   6 -14    8.94    0.71 
  -9   6 -14    5.78    0.55 
  -8   6 -14   21.33    1.47 
  -7   6 -14   29.41    2.04 
  -6   6 -14    0.19    0.22 
  -5   6 -14    5.66    0.54 
   3   6 -14    0.76    0.37 
   4   6 -14   22.22    1.99 
   5   6 -14    2.04    0.42 
   6   6 -14    4.67    0.61 
   7   6 -14    1.33    0.24 
   8   6 -14    1.19    0.24 
 -11   7 -14    5.29    0.52 
 -10   7 -14    0.11    0.24 
  -9   7 -14    9.77    0.74 
  -8   7 -14   24.01    1.71 
  -7   7 -14    0.69    0.26 
  -6   7 -14    2.10    0.36 
  -5   7 -14   19.79    1.47 
   2   7 -14    8.26    1.05 
   3   7 -14    2.43    0.46 
   4   7 -14    6.55    0.71 
   5   7 -14   20.47    1.72 
   6   7 -14    0.37    0.22 
   7   7 -14    0.09    0.14 
 -11   8 -14    7.59    0.62 
 -10   8 -14    0.47    0.25 
  -9   8 -14    8.71    0.71 
  -8   8 -14    5.21    0.55 
  -7   8 -14    6.68    0.62 
  -6   8 -14    1.90    0.32 
  -5   8 -14   16.56    1.28 
  -4   8 -14    6.94    0.63 
   1   8 -14    2.80    0.63 
   2   8 -14    1.21    0.39 
   3   8 -14    5.50    0.74 
   4   8 -14    9.50    0.98 
   5   8 -14    6.81    0.71 
   6   8 -14    0.56    0.16 
 -10   9 -14    0.54    0.25 
  -9   9 -14    1.56    0.31 
  -8   9 -14    2.90    0.41 
  -7   9 -14    9.75    0.78 
  -6   9 -14    0.37    0.26 
  -5   9 -14    2.34    0.43 
  -4   9 -14    0.20    0.25 
   1   9 -14    5.85    0.72 
   2   9 -14    2.48    0.51 
   3   9 -14   -0.02    0.23 
   4   9 -14    0.14    0.20 
   5   9 -14    1.28    0.24 
  -9  10 -14    5.54    0.54 
  -8  10 -14    2.07    0.33 
  -7  10 -14    2.43    0.41 
  -6  10 -14   20.63    1.54 
  -5  10 -14    7.41    0.72 
  -4  10 -14    7.92    0.71 
   1  10 -14    1.07    0.29 
   2  10 -14    0.53    0.23 
   3  10 -14    0.08    0.16 
  -8  11 -14    5.57    0.55 
  -7  11 -14    4.03    0.48 
  -6  11 -14    2.38    0.41 
  -5  11 -14    2.92    0.41 
   2  11 -14    0.50    0.16 
  -1 -12 -13    0.37    0.16 
   0 -12 -13    1.35    0.31 
   1 -12 -13   -0.05    0.19 
  11 -12 -13    0.37    0.10 
  12 -12 -13    1.47    0.16 
  13 -12 -13    0.14    0.07 
  -2 -11 -13    0.03    0.20 
  -1 -11 -13    0.30    0.22 
   0 -11 -13    0.71    0.27 
   1 -11 -13    0.22    0.24 
   2 -11 -13    6.30    0.78 
   9 -11 -13    1.79    0.18 
  10 -11 -13    7.02    0.33 
  11 -11 -13    0.88    0.11 
  12 -11 -13   -0.01    0.11 
  13 -11 -13    0.23    0.09 
  -4 -10 -13   -0.04    0.16 
  -3 -10 -13    0.30    0.22 
  -2 -10 -13    0.39    0.27 
  -1 -10 -13    7.46    0.81 
   0 -10 -13    0.07    0.29 
   1 -10 -13    8.90    0.98 
   2 -10 -13    1.52    0.38 
   7 -10 -13   19.19    1.32 
   8 -10 -13    0.74    0.15 
   9 -10 -13   10.64    0.46 
  10 -10 -13    0.29    0.10 
  11 -10 -13    0.05    0.09 
  12 -10 -13    0.51    0.09 
  13 -10 -13    4.84    0.23 
  14 -10 -13    0.09    0.07 
  -5  -9 -13    2.31    0.34 
  -4  -9 -13   -0.05    0.23 
  -3  -9 -13    0.35    0.28 
  -2  -9 -13    1.24    0.36 
  -1  -9 -13   11.74    1.11 
   0  -9 -13    6.62    0.73 
   1  -9 -13    0.44    0.31 
   2  -9 -13    1.23    0.35 
   6  -9 -13    6.83    0.37 
   7  -9 -13    6.33    0.32 
   8  -9 -13    6.42    0.31 
   9  -9 -13    5.52    0.26 
  10  -9 -13   10.13    0.37 
  11  -9 -13    7.72    0.30 
  12  -9 -13    8.67    0.32 
  13  -9 -13    1.25    0.11 
  14  -9 -13    2.19    0.13 
  -6  -8 -13    1.29    0.30 
  -5  -8 -13    0.24    0.24 
  -4  -8 -13    5.26    0.65 
  -3  -8 -13    8.85    0.84 
  -2  -8 -13    0.23    0.34 
  -1  -8 -13    4.98    0.75 
   0  -8 -13    8.66    0.97 
   1  -8 -13    2.30    0.79 
   2  -8 -13    8.97    1.42 
   3  -8 -13    0.75    0.49 
   4  -8 -13   13.73    0.87 
   5  -8 -13    0.47    0.18 
   6  -8 -13   11.72    0.79 
   7  -8 -13    2.66    0.35 
   8  -8 -13    9.40    0.40 
   9  -8 -13    0.28    0.11 
  10  -8 -13    2.44    0.20 
  11  -8 -13    0.99    0.12 
  12  -8 -13   17.90    0.59 
  13  -8 -13    7.20    0.31 
  14  -8 -13    0.27    0.07 
  -6  -7 -13   -0.05    0.23 
  -5  -7 -13    0.82    0.32 
  -4  -7 -13    5.09    0.81 
  -3  -7 -13   21.05    1.80 
  -2  -7 -13    8.17    0.84 
  -1  -7 -13    3.22    0.91 
   0  -7 -13   15.33    1.86 
   1  -7 -13    3.79    0.93 
   2  -7 -13    0.34    0.48 
   3  -7 -13    0.98    0.17 
   4  -7 -13    4.34    0.35 
   5  -7 -13    1.89    0.27 
   6  -7 -13   14.20    0.90 
   7  -7 -13   14.39    0.96 
   8  -7 -13    2.78    0.36 
   9  -7 -13    1.74    0.16 
  10  -7 -13   12.04    0.44 
  11  -7 -13   11.25    0.40 
  12  -7 -13    1.89    0.15 
  13  -7 -13    3.03    0.19 
  14  -7 -13    0.02    0.06 
  -6  -6 -13    2.91    0.55 
  -5  -6 -13   16.80    1.54 
  -4  -6 -13    0.50    0.34 
  -3  -6 -13    5.03    0.80 
  -2  -6 -13    9.25    1.67 
  -1  -6 -13   12.04    1.78 
   0  -6 -13    4.49    0.99 
   1  -6 -13    5.71    0.41 
   2  -6 -13    1.33    0.17 
   3  -6 -13    9.54    0.64 
   4  -6 -13   22.50    1.25 
   5  -6 -13   11.57    0.78 
   6  -6 -13    4.40    0.38 
   7  -6 -13    3.21    0.37 
   8  -6 -13   10.75    0.77 
   9  -6 -13    3.63    0.24 
  10  -6 -13    3.23    0.21 
  11  -6 -13   11.73    0.43 
  12  -6 -13    3.38    0.19 
  13  -6 -13    0.09    0.09 
  14  -6 -13    1.76    0.15 
  -6  -5 -13   12.35    0.71 
  -5  -5 -13    4.71    0.74 
  -4  -5 -13    8.88    1.66 
  -3  -5 -13    1.32    0.84 
  -2  -5 -13    2.33    0.85 
  -1  -5 -13    9.66    1.56 
   0  -5 -13    1.22    0.17 
   1  -5 -13   16.77    1.09 
   2  -5 -13   44.81    2.35 
   3  -5 -13    8.60    0.52 
   4  -5 -13    0.47    0.16 
   5  -5 -13    1.49    0.21 
   6  -5 -13    5.92    0.48 
   7  -5 -13    0.46    0.19 
   8  -5 -13    0.93    0.23 
   9  -5 -13    0.43    0.13 
  10  -5 -13    5.96    0.27 
  11  -5 -13   16.51    0.57 
  12  -5 -13    1.44    0.14 
  13  -5 -13    0.25    0.12 
  14  -5 -13    2.93    0.24 
  -7  -4 -13   12.01    0.83 
  -6  -4 -13    3.54    0.44 
  -5  -4 -13    0.52    0.24 
  -4  -4 -13   17.20    2.20 
  -3  -4 -13    4.61    1.21 
  -2  -4 -13   21.87    1.27 
  -1  -4 -13    0.31    0.13 
   0  -4 -13  111.93   10.55 
   1  -4 -13   22.56    2.16 
   2  -4 -13   16.36    1.84 
   3  -4 -13   75.48    7.11 
   4  -4 -13  115.83   10.45 
   5  -4 -13   19.70    1.28 
   6  -4 -13    1.16    0.21 
   7  -4 -13    0.92    0.22 
   8  -4 -13   15.79    1.03 
   9  -4 -13    6.55    0.32 
  10  -4 -13    1.10    0.12 
  11  -4 -13    7.59    0.44 
  12  -4 -13    4.36    0.33 
  13  -4 -13    0.01    0.10 
  14  -4 -13    0.04    0.09 
  -8  -3 -13    1.18    0.25 
  -7  -3 -13   12.21    0.91 
  -6  -3 -13    2.67    0.42 
  -5  -3 -13    0.30    0.23 
  -4  -3 -13    1.27    0.80 
  -3  -3 -13   12.06    1.63 
  -2  -3 -13    6.70    1.26 
  -1  -3 -13   80.19    7.23 
   0  -3 -13    2.73    0.71 
   1  -3 -13   65.00    6.12 
   2  -3 -13   56.43    5.35 
   3  -3 -13    3.37    0.60 
   5  -3 -13   41.92    2.77 
   6  -3 -13   11.02    0.75 
   7  -3 -13    4.50    0.40 
   8  -3 -13    1.02    0.21 
   9  -3 -13    6.96    0.59 
  10  -3 -13   19.20    0.97 
  11  -3 -13    6.79    0.43 
  12  -3 -13    0.10    0.13 
  13  -3 -13    0.13    0.13 
  -9  -2 -13    6.83    0.59 
  -8  -2 -13    2.74    0.36 
  -7  -2 -13    2.12    0.37 
  -6  -2 -13   10.23    0.74 
  -5  -2 -13   -0.08    0.19 
  -4  -2 -13    0.53    0.69 
  -3  -2 -13   43.74    4.57 
  -2  -2 -13   17.96    1.96 
  -1  -2 -13   53.21    5.39 
   0  -2 -13    3.20    0.65 
   1  -2 -13    9.18    1.04 
   2  -2 -13    2.28    0.56 
   6  -2 -13   23.14    1.46 
   9  -2 -13    7.50    0.61 
  10  -2 -13    1.28    0.19 
  11  -2 -13    1.97    0.22 
  12  -2 -13    0.70    0.17 
  13  -2 -13    0.04    0.10 
  -9  -1 -13    9.52    0.75 
  -8  -1 -13    0.40    0.22 
  -7  -1 -13    2.46    0.38 
  -6  -1 -13    3.48    0.38 
  -5  -1 -13    5.89    0.47 
  -4  -1 -13   23.27    2.35 
  -3  -1 -13   15.60    2.13 
  -2  -1 -13   58.53    6.12 
  -1  -1 -13    7.14    1.03 
   0  -1 -13   27.62    3.11 
   1  -1 -13   29.92    3.11 
   9  -1 -13    6.88    0.42 
  10  -1 -13   11.52    0.59 
  11  -1 -13    8.15    0.59 
 -10   0 -13    0.39    0.22 
  -9   0 -13    4.45    0.50 
  -8   0 -13    8.48    0.72 
  -7   0 -13   13.16    1.00 
  -6   0 -13    3.13    0.39 
  -5   0 -13    1.27    0.23 
  -4   0 -13  103.39   10.52 
  -3   0 -13    3.26    0.72 
  -2   0 -13    2.75    0.59 
  -1   0 -13   29.56    3.11 
   0   0 -13   -0.04    0.27 
   1   0 -13   33.83    3.11 
 -10   1 -13   10.92    0.83 
  -9   1 -13    7.13    0.59 
  -8   1 -13    2.62    0.39 
  -7   1 -13   12.23    0.94 
  -6   1 -13   10.59    0.81 
  -5   1 -13    0.34    0.18 
  -2   1 -13    8.38    1.00 
  -1   1 -13   30.10    3.08 
 -11   2 -13    1.61    0.27 
 -10   2 -13    1.01    0.28 
  -9   2 -13    6.51    0.61 
  -8   2 -13   11.21    0.85 
  -7   2 -13    1.84    0.29 
  -6   2 -13   20.77    1.51 
  -5   2 -13    7.16    0.61 
   7   2 -13    1.89    0.37 
   8   2 -13    2.35    0.49 
 -11   3 -13    7.23    0.62 
 -10   3 -13   19.77    1.40 
  -9   3 -13    7.53    0.62 
  -8   3 -13    0.91    0.26 
  -7   3 -13    4.55    0.45 
  -6   3 -13   10.53    0.78 
  -5   3 -13   38.64    2.85 
   6   3 -13    2.77    0.50 
   7   3 -13   11.06    1.19 
   8   3 -13    0.84    0.29 
 -11   4 -13    7.30    0.63 
 -10   4 -13    1.01    0.29 
  -9   4 -13    6.86    0.61 
  -8   4 -13   14.39    1.08 
  -7   4 -13    0.86    0.23 
  -6   4 -13    0.88    0.22 
  -5   4 -13   18.68    1.32 
   6   4 -13    3.64    0.64 
   7   4 -13   12.23    1.10 
   8   4 -13   17.06    1.57 
   9   4 -13    0.77    0.20 
 -11   5 -13   17.16    1.21 
 -10   5 -13    5.86    0.57 
  -9   5 -13    0.20    0.26 
  -8   5 -13    0.71    0.25 
  -7   5 -13    0.06    0.21 
  -6   5 -13    5.67    0.50 
  -5   5 -13    1.34    0.23 
  -4   5 -13    0.58    0.20 
   5   5 -13    5.35    0.80 
   6   5 -13   12.97    1.20 
   7   5 -13    1.33    0.34 
   8   5 -13    7.53    0.71 
   9   5 -13    1.96    0.28 
 -11   6 -13   11.67    0.91 
 -10   6 -13    3.34    0.47 
  -9   6 -13    3.86    0.45 
  -8   6 -13   10.54    0.82 
  -7   6 -13    3.47    0.42 
  -6   6 -13    3.49    0.40 
  -5   6 -13   11.46    0.82 
  -4   6 -13   21.23    1.52 
   3   6 -13    5.41    0.84 
   4   6 -13    0.61    0.37 
   5   6 -13   17.98    1.57 
   6   6 -13    3.60    0.57 
   7   6 -13    3.10    0.45 
   8   6 -13    0.19    0.14 
 -11   7 -13   11.16    0.84 
 -10   7 -13   12.54    0.92 
  -9   7 -13    1.85    0.32 
  -8   7 -13    2.64    0.42 
  -7   7 -13   13.49    1.01 
  -6   7 -13   12.59    0.94 
  -5   7 -13    1.80    0.31 
  -4   7 -13    4.58    0.47 
   2   7 -13    6.85    0.89 
   3   7 -13   20.79    1.84 
   4   7 -13    6.59    0.87 
   5   7 -13    0.90    0.32 
   6   7 -13    0.24    0.23 
   7   7 -13    0.04    0.15 
 -11   8 -13    0.84    0.28 
 -10   8 -13    2.89    0.42 
  -9   8 -13    0.47    0.26 
  -8   8 -13    9.38    0.75 
  -7   8 -13    2.33    0.40 
  -6   8 -13   11.33    0.86 
  -5   8 -13    0.93    0.28 
  -4   8 -13   13.42    1.10 
   1   8 -13    4.42    0.84 
   2   8 -13    0.42    0.35 
   3   8 -13    9.06    0.88 
   4   8 -13    5.19    0.65 
   5   8 -13    0.32    0.23 
   6   8 -13    1.75    0.30 
 -11   9 -13    7.82    0.62 
 -10   9 -13    9.69    0.77 
  -9   9 -13    4.93    0.53 
  -8   9 -13    6.95    0.60 
  -7   9 -13    6.64    0.61 
  -6   9 -13    6.62    0.62 
  -5   9 -13    5.61    0.60 
   1   9 -13   11.04    1.13 
   2   9 -13    1.17    0.35 
   3   9 -13   -0.03    0.25 
   4   9 -13    0.04    0.21 
   5   9 -13    2.50    0.35 
 -10  10 -13    0.35    0.24 
  -9  10 -13   10.76    0.85 
  -8  10 -13    0.88    0.28 
  -7  10 -13   19.29    1.40 
  -6  10 -13    0.92    0.29 
  -5  10 -13    5.94    0.59 
   1  10 -13    7.66    0.82 
   2  10 -13    0.44    0.25 
   3  10 -13    0.16    0.19 
   4  10 -13    0.05    0.14 
  -9  11 -13    1.47    0.28 
  -8  11 -13    6.62    0.62 
  -7  11 -13    7.21    0.64 
  -6  11 -13   15.17    1.21 
  -5  11 -13   10.21    0.90 
  -4  11 -13    9.30    0.84 
   2  11 -13    0.02    0.15 
  12 -13 -12    0.16    0.13 
  -1 -12 -12    0.03    0.15 
   0 -12 -12    4.22    0.52 
   1 -12 -12    0.04    0.21 
  11 -12 -12    0.43    0.12 
  12 -12 -12    4.93    0.27 
  13 -12 -12    0.01    0.08 
  -2 -11 -12    0.79    0.23 
  -1 -11 -12    0.51    0.24 
   0 -11 -12   -0.10    0.25 
   1 -11 -12    0.72    0.28 
   2 -11 -12    0.21    0.26 
   9 -11 -12    0.79    0.14 
  10 -11 -12    5.01    0.27 
  11 -11 -12    0.04    0.10 
  12 -11 -12    0.17    0.12 
  13 -11 -12    0.52    0.10 
  -4 -10 -12    2.21    0.33 
  -3 -10 -12    0.75    0.25 
  -2 -10 -12    0.33    0.27 
  -1 -10 -12    5.23    0.67 
   0 -10 -12    1.01    0.33 
   1 -10 -12    7.23    0.88 
   2 -10 -12    8.70    0.88 
   8 -10 -12   16.81    0.83 
   9 -10 -12    3.75    0.25 
  10 -10 -12    0.59    0.13 
  11 -10 -12    0.79    0.13 
  12 -10 -12    0.11    0.09 
  13 -10 -12    2.99    0.18 
  14 -10 -12    1.82    0.12 
  -5  -9 -12    2.19    0.32 
  -3  -9 -12    6.30    0.70 
  -2  -9 -12    1.41    0.35 
  -1  -9 -12    3.40    0.64 
   0  -9 -12    7.98    0.89 
   1  -9 -12    0.87    0.33 
   6  -9 -12   17.46    1.29 
   7  -9 -12    1.98    0.21 
   8  -9 -12   15.89    0.63 
   9  -9 -12    7.70    0.32 
  10  -9 -12    8.45    0.33 
  11  -9 -12    0.43    0.11 
  12  -9 -12   15.85    0.54 
  13  -9 -12    2.17    0.17 
  14  -9 -12    0.13    0.07 
  -6  -8 -12    0.45    0.21 
  -5  -8 -12   12.64    1.09 
  -4  -8 -12    1.29    0.33 
  -3  -8 -12    4.67    0.70 
  -2  -8 -12   20.27    1.66 
  -1  -8 -12   17.48    1.51 
   0  -8 -12    0.88    0.65 
   1  -8 -12   48.25    5.42 
   2  -8 -12   19.10    2.16 
   3  -8 -12    0.41    0.45 
   4  -8 -12    0.65    0.45 
   5  -8 -12    1.71    0.24 
   6  -8 -12   23.90    1.58 
   7  -8 -12   10.27    0.72 
   8  -8 -12    0.72    0.13 
   9  -8 -12    0.74    0.13 
  10  -8 -12    7.86    0.33 
  11  -8 -12   20.98    0.68 
  12  -8 -12    4.68    0.22 
  13  -8 -12    5.86    0.23 
  14  -8 -12    0.18    0.07 
  -7  -7 -12    0.24    0.19 
  -6  -7 -12    0.85    0.28 
  -5  -7 -12    0.84    0.32 
  -4  -7 -12   13.65    1.27 
  -3  -7 -12    3.99    0.62 
  -2  -7 -12    3.24    0.55 
  -1  -7 -12    7.61    1.52 
   0  -7 -12   31.79    3.33 
   1  -7 -12    4.76    1.16 
   2  -7 -12   29.29    3.15 
   3  -7 -12    1.51    0.21 
   4  -7 -12    2.28    0.25 
   5  -7 -12    4.40    0.36 
   6  -7 -12   10.27    0.71 
   7  -7 -12   33.08    1.94 
   8  -7 -12   52.71    3.36 
   9  -7 -12   10.89    0.46 
  10  -7 -12    2.19    0.17 
  11  -7 -12   14.07    0.49 
  12  -7 -12    0.82    0.11 
  13  -7 -12    0.56    0.08 
  14  -7 -12    0.20    0.07 
  -6  -6 -12    2.18    0.38 
  -5  -6 -12    0.59    0.21 
  -4  -6 -12   10.36    0.70 
  -2  -6 -12   26.96    2.93 
  -1  -6 -12   12.83    1.60 
   0  -6 -12   38.24    3.86 
   1  -6 -12    9.76    1.17 
   2  -6 -12   10.19    0.71 
   3  -6 -12   23.62    1.33 
   4  -6 -12    8.54    0.54 
   5  -6 -12    0.76    0.19 
   6  -6 -12   37.99    2.31 
   7  -6 -12    7.26    0.59 
   8  -6 -12   19.45    1.24 
   9  -6 -12    1.47    0.19 
  10  -6 -12    2.67    0.19 
  11  -6 -12    1.21    0.13 
  12  -6 -12    1.95    0.15 
  13  -6 -12    0.62    0.10 
  14  -6 -12    0.99    0.09 
  -6  -5 -12    0.77    0.21 
  -5  -5 -12    1.64    0.25 
  -4  -5 -12    0.25    0.24 
  -3  -5 -12    4.31    1.09 
  -2  -5 -12    6.37    1.23 
  -1  -5 -12    1.08    0.67 
   0  -5 -12   24.26    2.87 
   1  -5 -12   35.74    3.15 
   2  -5 -12   22.26    2.17 
   3  -5 -12    0.48    0.40 
   4  -5 -12   41.91    4.02 
   5  -5 -12   27.08    1.70 
   6  -5 -12    6.72    0.51 
   7  -5 -12   30.24    1.90 
   8  -5 -12    0.46    0.20 
   9  -5 -12    5.46    0.49 
  10  -5 -12    1.65    0.14 
  11  -5 -12    0.37    0.11 
  12  -5 -12    1.13    0.13 
  13  -5 -12   10.81    0.58 
  14  -5 -12    1.26    0.21 
  -7  -4 -12   12.99    1.01 
  -6  -4 -12    2.89    0.41 
  -5  -4 -12    5.33    0.50 
  -4  -4 -12    0.78    0.24 
  -3  -4 -12    2.14    0.92 
  -2  -4 -12    7.67    1.39 
  -1  -4 -12   46.03    4.21 
   0  -4 -12    8.73    1.47 
   1  -4 -12   76.76    7.25 
   2  -4 -12  104.87    9.51 
   3  -4 -12  150.02   13.98 
   4  -4 -12   13.80    1.42 
   6  -4 -12   12.55    0.84 
   7  -4 -12    1.61    0.27 
   8  -4 -12    0.21    0.19 
   9  -4 -12    0.10    0.19 
  10  -4 -12   11.28    0.41 
  11  -4 -12   12.78    0.68 
  12  -4 -12    0.87    0.16 
  13  -4 -12    2.15    0.21 
  14  -4 -12    2.41    0.23 
  -8  -3 -12   20.18    1.39 
  -7  -3 -12    2.66    0.37 
  -6  -3 -12    1.51    0.27 
  -5  -3 -12    0.44    0.22 
  -4  -3 -12    1.36    0.24 
  -3  -3 -12   24.10    2.79 
  -2  -3 -12    0.02    0.56 
  -1  -3 -12  143.54   14.07 
   0  -3 -12   13.53    1.39 
   1  -3 -12    0.50    0.39 
   2  -3 -12   21.89    2.23 
   3  -3 -12   10.91    1.25 
   6  -3 -12   24.63    1.56 
   7  -3 -12    2.60    0.30 
   8  -3 -12    1.86    0.29 
   9  -3 -12   19.10    1.36 
  10  -3 -12    2.60    0.27 
  11  -3 -12    4.94    0.36 
  12  -3 -12    5.58    0.35 
  13  -3 -12    0.42    0.15 
  -9  -2 -12    0.81    0.23 
  -8  -2 -12    7.79    0.66 
  -7  -2 -12   11.27    0.83 
  -6  -2 -12   16.99    1.13 
  -5  -2 -12   28.55    1.70 
  -4  -2 -12   12.52    0.79 
  -3  -2 -12   17.02    2.26 
  -2  -2 -12   99.25    9.58 
  -1  -2 -12   19.07    2.28 
   0  -2 -12   47.72    4.63 
   1  -2 -12    8.80    1.15 
   2  -2 -12   48.60    4.59 
   6  -2 -12    9.42    0.61 
   9  -2 -12    2.23    0.32 
  10  -2 -12   17.74    0.89 
  11  -2 -12    0.85    0.17 
  12  -2 -12    0.45    0.17 
  13  -2 -12    0.42    0.12 
  -9  -1 -12    9.03    0.68 
  -8  -1 -12    0.99    0.26 
  -7  -1 -12   52.28    3.47 
  -6  -1 -12    8.81    0.59 
  -5  -1 -12    5.83    0.49 
  -4  -1 -12   26.61    1.65 
  -3  -1 -12   74.52    7.29 
  -2  -1 -12    1.12    0.48 
  -1  -1 -12    9.53    1.19 
   0  -1 -12   11.95    1.44 
   1  -1 -12   13.37    1.44 
   2  -1 -12   10.54    1.14 
   9  -1 -12   15.21    1.14 
  10  -1 -12    4.01    0.34 
  11  -1 -12    5.24    0.48 
  12  -1 -12    0.40    0.15 
 -10   0 -12    0.39    0.22 
  -9   0 -12    7.97    0.65 
  -8   0 -12    1.07    0.26 
  -7   0 -12   26.72    2.00 
  -6   0 -12   34.11    2.38 
  -5   0 -12   26.27    1.51 
  -4   0 -12   13.37    0.76 
  -3   0 -12    9.00    1.30 
  -2   0 -12   42.47    4.60 
  -1   0 -12   12.47    1.44 
   0   0 -12  102.67   10.32 
   1   0 -12   14.59    1.43 
   9   0 -12    7.84    0.67 
 -10   1 -12    3.43    0.43 
  -9   1 -12   15.46    1.15 
  -8   1 -12   10.03    0.77 
  -7   1 -12    8.78    0.75 
  -6   1 -12    0.68    0.22 
  -5   1 -12   34.61    2.60 
  -4   1 -12  127.89    9.27 
  -2   1 -12    9.92    1.14 
  -1   1 -12   12.67    1.40 
   0   1 -12   13.01    1.40 
 -11   2 -12    0.96    0.24 
 -10   2 -12   17.79    1.27 
  -9   2 -12    2.16    0.34 
  -8   2 -12   23.11    1.65 
  -7   2 -12    4.00    0.44 
  -6   2 -12    8.23    0.65 
  -5   2 -12    0.59    0.17 
  -4   2 -12   84.70    6.25 
   8   2 -12    6.78    0.88 
 -11   3 -12    5.13    0.51 
 -10   3 -12    2.41    0.42 
  -9   3 -12   19.28    1.37 
  -8   3 -12    2.31    0.37 
  -7   3 -12    2.28    0.34 
  -6   3 -12   22.94    1.61 
  -5   3 -12   17.39    1.30 
  -4   3 -12   65.56    4.72 
   7   3 -12    2.82    0.43 
   8   3 -12   19.33    1.78 
 -11   4 -12   12.75    0.97 
 -10   4 -12   11.85    0.88 
  -9   4 -12    0.15    0.24 
  -8   4 -12    0.80    0.24 
  -7   4 -12    1.74    0.26 
  -6   4 -12   11.86    0.87 
  -5   4 -12   26.90    1.93 
  -4   4 -12   11.95    0.85 
   6   4 -12    2.91    0.65 
   7   4 -12   12.86    1.33 
   8   4 -12    3.71    0.59 
   9   4 -12    2.07    0.35 
 -12   5 -12    1.35    0.27 
 -11   5 -12    0.53    0.26 
 -10   5 -12    1.94    0.33 
  -9   5 -12    5.63    0.55 
  -8   5 -12    0.77    0.24 
  -7   5 -12   28.56    1.97 
  -6   5 -12    6.21    0.54 
  -5   5 -12   25.25    1.75 
  -4   5 -12   35.57    2.61 
  -3   5 -12    0.98    0.20 
   5   5 -12    1.96    0.43 
   6   5 -12    0.90    0.37 
   7   5 -12    1.22    0.31 
   8   5 -12    5.19    0.61 
   9   5 -12    0.13    0.14 
 -12   6 -12    1.90    0.31 
 -11   6 -12    1.15    0.30 
 -10   6 -12    3.16    0.44 
  -9   6 -12    1.11    0.29 
  -8   6 -12   19.25    1.29 
  -7   6 -12    8.12    0.64 
  -6   6 -12   36.16    2.38 
  -5   6 -12    0.79    0.23 
  -4   6 -12    8.81    0.67 
   4   6 -12   10.31    1.17 
   5   6 -12    0.76    0.36 
   6   6 -12    2.65    0.53 
   7   6 -12    0.29    0.24 
   8   6 -12    0.29    0.16 
 -12   7 -12    0.88    0.26 
 -11   7 -12   14.37    1.04 
 -10   7 -12    2.22    0.39 
  -9   7 -12   11.42    0.85 
  -8   7 -12   53.38    3.48 
  -7   7 -12   29.31    2.01 
  -6   7 -12    9.42    0.76 
  -5   7 -12    4.31    0.46 
   2   7 -12    2.95    0.51 
   3   7 -12    3.95    0.64 
   4   7 -12   14.43    1.31 
   5   7 -12    0.97    0.34 
   6   7 -12    1.01    0.27 
   7   7 -12    0.17    0.17 
 -11   8 -12   20.49    1.41 
 -10   8 -12    8.31    0.69 
  -9   8 -12    1.21    0.29 
  -8   8 -12    0.76    0.27 
  -7   8 -12   10.19    0.79 
  -6   8 -12   24.46    1.67 
  -5   8 -12    1.89    0.33 
   1   8 -12   16.13    1.56 
   2   8 -12   18.05    1.68 
   3   8 -12    3.72    0.71 
   4   8 -12    1.27    0.35 
   5   8 -12   12.57    1.09 
   6   8 -12    0.57    0.20 
 -11   9 -12    0.51    0.25 
 -10   9 -12    8.78    0.70 
  -9   9 -12    8.15    0.68 
  -8   9 -12   16.45    1.16 
  -7   9 -12    1.93    0.34 
  -6   9 -12   19.63    1.38 
  -5   9 -12    0.11    0.26 
   1   9 -12    2.80    0.53 
   2   9 -12    1.17    0.35 
   3   9 -12    5.43    0.69 
   4   9 -12    1.36    0.32 
   5   9 -12    1.98    0.32 
 -10  10 -12    0.77    0.26 
  -9  10 -12    4.29    0.45 
  -8  10 -12   18.17    1.28 
  -7  10 -12    1.93    0.35 
  -6  10 -12   11.75    0.89 
  -5  10 -12    1.16    0.33 
   1  10 -12    5.28    0.68 
   2  10 -12   -0.11    0.24 
   3  10 -12    0.42    0.22 
   4  10 -12    2.22    0.33 
  -9  11 -12    0.85    0.26 
  -8  11 -12    4.68    0.51 
  -7  11 -12   11.43    0.97 
  -6  11 -12    0.60    0.28 
  -5  11 -12    0.95    0.30 
   1  11 -12    0.49    0.23 
   2  11 -12    0.65    0.19 
  -6  12 -12    1.80    0.33 
  11 -13 -11    0.64    0.18 
  12 -13 -11    1.90    0.26 
  -1 -12 -11    1.90    0.32 
   0 -12 -11    8.84    0.83 
   1 -12 -11    0.52    0.24 
  10 -12 -11    2.31    0.38 
  11 -12 -11    0.90    0.24 
  12 -12 -11    8.55    0.43 
  13 -12 -11    0.28    0.09 
  -3 -11 -11    1.58    0.29 
  -2 -11 -11    0.62    0.24 
  -1 -11 -11    2.04    0.42 
   0 -11 -11    3.56    0.55 
   1 -11 -11    0.32    0.27 
   2 -11 -11    1.63    0.35 
  10 -11 -11   16.34    0.64 
  11 -11 -11    3.76    0.23 
  12 -11 -11    0.55    0.10 
  13 -11 -11    0.13    0.10 
  14 -11 -11    8.43    0.39 
  -4 -10 -11    0.82    0.21 
  -3 -10 -11    2.24    0.42 
  -2 -10 -11    1.54    0.36 
  -1 -10 -11   17.78    1.53 
   0 -10 -11    3.78    0.60 
   1 -10 -11    2.78    0.54 
   2 -10 -11    2.51    0.60 
   8 -10 -11    0.65    0.14 
   9 -10 -11    0.73    0.13 
  10 -10 -11    3.66    0.24 
  11 -10 -11    0.38    0.12 
  12 -10 -11    0.34    0.11 
  13 -10 -11    0.42    0.09 
  14 -10 -11    0.75    0.10 
  -5  -9 -11   27.77    2.59 
  -3  -9 -11    1.87    0.42 
  -2  -9 -11    6.66    0.73 
  -1  -9 -11    0.90    0.35 
   0  -9 -11    0.59    0.35 
   1  -9 -11   25.97    2.61 
   6  -9 -11   19.15    1.42 
   7  -9 -11   28.18    1.90 
   8  -9 -11    3.37    0.27 
   9  -9 -11    0.53    0.12 
  10  -9 -11    1.92    0.16 
  11  -9 -11    2.23    0.18 
  12  -9 -11    2.86    0.18 
  13  -9 -11    5.19    0.21 
  14  -9 -11   -0.02    0.07 
  -6  -8 -11   21.37    1.66 
  -5  -8 -11    1.60    0.34 
  -4  -8 -11    8.14    0.93 
  -3  -8 -11    0.56    0.34 
  -2  -8 -11    0.21    0.34 
  -1  -8 -11    2.68    0.63 
   0  -8 -11   92.97    9.36 
   1  -8 -11    4.93    1.01 
   2  -8 -11   59.33    7.15 
   3  -8 -11    8.62    1.16 
   4  -8 -11   17.62    2.06 
   5  -8 -11   11.28    0.80 
   6  -8 -11    3.28    0.36 
   7  -8 -11   22.50    1.49 
   8  -8 -11   95.36    5.88 
   9  -8 -11   30.13    1.13 
  10  -8 -11    3.82    0.22 
  11  -8 -11    7.27    0.31 
  12  -8 -11    1.51    0.12 
  13  -8 -11   11.93    0.41 
  14  -8 -11    0.08    0.07 
  -7  -7 -11    0.54    0.23 
  -6  -7 -11   18.80    1.67 
  -5  -7 -11   16.06    0.83 
  -4  -7 -11    2.89    0.33 
  -3  -7 -11    1.84    0.27 
  -2  -7 -11   30.33    3.43 
  -1  -7 -11   27.31    2.77 
   0  -7 -11  102.57   11.56 
   1  -7 -11  194.26   18.64 
   2  -7 -11    4.17    0.84 
   3  -7 -11    0.44    0.45 
   4  -7 -11    1.41    0.21 
   5  -7 -11    2.30    0.25 
   6  -7 -11   65.23    4.02 
   7  -7 -11  115.36    7.35 
   8  -7 -11    4.62    0.44 
   9  -7 -11   69.90    3.01 
  10  -7 -11   17.36    0.59 
  11  -7 -11    1.95    0.15 
  12  -7 -11   12.44    0.45 
  13  -7 -11    0.53    0.09 
  14  -7 -11    0.93    0.09 
  -7  -6 -11    0.67    0.29 
  -6  -6 -11    1.18    0.22 
  -5  -6 -11    1.31    0.23 
  -4  -6 -11   10.94    0.71 
  -3  -6 -11   23.21    1.34 
  -2  -6 -11    6.48    1.27 
  -1  -6 -11   65.34    6.53 
   1  -6 -11   72.34    7.19 
   2  -6 -11   14.17    1.63 
   3  -6 -11   51.87    4.99 
   4  -6 -11    0.96    0.17 
   5  -6 -11   53.91    2.87 
   6  -6 -11    4.82    0.42 
   7  -6 -11  193.65   11.96 
   8  -6 -11   72.97    4.54 
   9  -6 -11    0.44    0.23 
  10  -6 -11    2.40    0.19 
  11  -6 -11    0.83    0.12 
  12  -6 -11    2.22    0.16 
  13  -6 -11   17.89    0.62 
  14  -6 -11   18.00    0.71 
  -7  -5 -11   12.34    0.93 
  -6  -5 -11    1.54    0.22 
  -5  -5 -11    5.47    0.43 
  -4  -5 -11    2.52    0.37 
  -3  -5 -11    9.54    0.78 
  -2  -5 -11    2.45    0.86 
  -1  -5 -11   55.38    5.55 
   0  -5 -11   23.01    2.12 
   1  -5 -11    5.28    1.06 
   2  -5 -11    2.59    0.68 
   3  -5 -11  154.63   15.07 
   4  -5 -11  129.93   12.21 
   5  -5 -11   18.34    1.14 
   6  -5 -11   73.81    4.53 
   7  -5 -11    4.32    0.35 
   8  -5 -11    8.31    0.62 
   9  -5 -11    4.72    0.44 
  10  -5 -11    4.98    0.28 
  11  -5 -11    1.57    0.13 
  12  -5 -11   13.31    0.49 
  13  -5 -11    2.18    0.23 
  14  -5 -11   31.58    2.01 
  -8  -4 -11    1.96    0.33 
  -7  -4 -11    1.32    0.29 
  -6  -4 -11    2.69    0.40 
  -5  -4 -11    4.04    0.44 
  -4  -4 -11   17.75    1.14 
  -3  -4 -11    1.83    0.26 
  -2  -4 -11    1.37    0.74 
  -1  -4 -11  121.96   12.35 
   0  -4 -11  150.04   13.12 
   1  -4 -11   17.54    1.76 
   2  -4 -11   75.02    7.16 
   3  -4 -11    2.37    0.52 
   4  -4 -11  145.22   13.00 
   6  -4 -11   13.07    0.91 
   7  -4 -11    0.77    0.21 
   8  -4 -11   18.40    1.24 
   9  -4 -11    2.01    0.33 
  10  -4 -11   11.66    0.48 
  11  -4 -11    1.64    0.21 
  12  -4 -11    8.49    0.49 
  13  -4 -11   13.07    0.65 
  14  -4 -11    0.57    0.13 
  -8  -3 -11    7.59    0.62 
  -7  -3 -11   16.04    1.21 
  -6  -3 -11    0.88    0.26 
  -5  -3 -11    7.17    0.59 
  -4  -3 -11    0.42    0.21 
  -3  -3 -11   46.27    2.74 
  -2  -3 -11  168.77   15.24 
  -1  -3 -11    1.14    0.56 
   0  -3 -11   21.51    2.40 
   1  -3 -11   17.93    1.98 
   2  -3 -11   96.02    9.12 
   3  -3 -11   24.00    2.32 
   7  -3 -11    1.39    0.23 
   8  -3 -11   12.71    0.83 
  10  -3 -11    2.49    0.24 
  11  -3 -11    0.75    0.18 
  12  -3 -11    2.92    0.27 
  13  -3 -11    2.31    0.29 
  14  -3 -11    1.63    0.18 
  -9  -2 -11    2.10    0.34 
  -8  -2 -11    4.55    0.44 
  -7  -2 -11   62.30    3.67 
  -6  -2 -11   74.94    3.97 
  -5  -2 -11    2.60    0.35 
  -4  -2 -11   12.77    0.84 
  -3  -2 -11    3.12    0.30 
  -2  -2 -11   72.22    7.24 
  -1  -2 -11  103.22    9.20 
   0  -2 -11  120.24   11.45 
   1  -2 -11   29.24    2.75 
   2  -2 -11  121.23   11.40 
   9  -2 -11   28.78    1.99 
  10  -2 -11    0.57    0.18 
  11  -2 -11    4.91    0.37 
  12  -2 -11    2.38    0.31 
  13  -2 -11    0.47    0.14 
 -10  -1 -11    0.34    0.21 
  -9  -1 -11    2.24    0.37 
  -8  -1 -11   32.70    2.05 
  -7  -1 -11    4.13    0.43 
  -6  -1 -11  182.91   10.30 
  -5  -1 -11   70.61    3.94 
  -4  -1 -11    8.14    0.53 
  -3  -1 -11   12.33    1.78 
  -2  -1 -11   18.35    2.03 
  -1  -1 -11   22.73    2.75 
   0  -1 -11  173.55   17.28 
   1  -1 -11  182.21   17.27 
   2  -1 -11   30.21    2.72 
   9  -1 -11    3.76    0.46 
  10  -1 -11    0.72    0.24 
  11  -1 -11   17.08    1.17 
  12  -1 -11    1.02    0.18 
 -10   0 -11    3.13    0.40 
  -9   0 -11    0.74    0.24 
  -8   0 -11   89.18    6.06 
  -7   0 -11  117.08    7.58 
  -6   0 -11    5.70    0.43 
  -5   0 -11   13.19    1.01 
  -4   0 -11  118.21    7.20 
  -3   0 -11   22.98    2.40 
  -2   0 -11  110.11   11.42 
  -1   0 -11  171.29   17.27 
   0   0 -11   -0.03    0.23 
   1   0 -11  186.27   17.26 
 -11   1 -11   15.67    1.17 
 -10   1 -11    0.94    0.26 
  -9   1 -11    3.60    0.44 
  -8   1 -11   21.45    1.55 
  -7   1 -11   59.27    4.14 
  -6   1 -11   50.12    3.51 
  -5   1 -11  115.07    8.10 
  -3   1 -11   89.38    9.11 
  -2   1 -11   28.02    2.72 
  -1   1 -11  171.65   17.24 
   0   1 -11  176.27   17.24 
 -11   2 -11    5.40    0.49 
 -10   2 -11    0.28    0.25 
  -9   2 -11   29.31    1.99 
  -8   2 -11    3.40    0.43 
  -7   2 -11    1.76    0.32 
  -6   2 -11    1.30    0.22 
  -5   2 -11  141.08   10.00 
 -11   3 -11    0.60    0.26 
 -10   3 -11    2.35    0.42 
  -9   3 -11   21.47    1.50 
  -8   3 -11   12.26    0.87 
  -7   3 -11    1.30    0.24 
  -6   3 -11   47.28    3.23 
  -5   3 -11    2.58    0.30 
   7   3 -11   15.73    1.57 
   8   3 -11    5.71    0.81 
 -12   4 -11    9.27    0.70 
 -11   4 -11    1.62    0.30 
 -10   4 -11   11.92    0.90 
  -9   4 -11    2.17    0.38 
  -8   4 -11   18.76    1.29 
  -7   4 -11    0.58    0.21 
  -6   4 -11   12.98    0.95 
  -5   4 -11    7.55    0.58 
  -4   4 -11  124.51    8.62 
   6   4 -11    3.63    0.64 
   7   4 -11    1.14    0.38 
   8   4 -11    1.57    0.32 
   9   4 -11    5.05    0.55 
 -12   5 -11   13.44    1.04 
 -11   5 -11    1.49    0.32 
 -10   5 -11    5.37    0.54 
  -9   5 -11    4.13    0.46 
  -8   5 -11    8.25    0.66 
  -7   5 -11    3.94    0.40 
  -6   5 -11   71.41    4.67 
  -5   5 -11   15.80    1.18 
  -4   5 -11  125.36    8.11 
   5   5 -11    6.17    0.81 
   6   5 -11    1.37    0.39 
   7   5 -11   13.24    1.22 
   8   5 -11   10.75    1.09 
   9   5 -11    0.12    0.14 
 -12   6 -11    2.15    0.37 
 -11   6 -11    1.01    0.29 
 -10   6 -11    2.55    0.42 
  -9   6 -11    1.18    0.28 
  -8   6 -11   74.95    4.69 
  -7   6 -11  191.37   12.32 
  -6   6 -11    5.16    0.47 
  -5   6 -11   54.53    3.52 
  -4   6 -11    0.96    0.23 
   4   6 -11   11.42    1.25 
   5   6 -11    1.46    0.41 
   6   6 -11    1.00    0.37 
   7   6 -11    0.70    0.26 
   8   6 -11    0.12    0.17 
 -12   7 -11   12.86    0.95 
 -11   7 -11    1.78    0.33 
 -10   7 -11   17.24    1.22 
  -9   7 -11   69.16    4.34 
  -8   7 -11    4.54    0.48 
  -7   7 -11  121.08    7.58 
  -6   7 -11   64.55    4.16 
  -5   7 -11    1.96    0.31 
   3   7 -11    1.67    0.48 
   4   7 -11    2.75    0.47 
   5   7 -11   17.16    1.39 
   6   7 -11   19.71    1.67 
   7   7 -11    0.63    0.21 
 -12   8 -11    1.20    0.28 
 -11   8 -11    7.63    0.64 
 -10   8 -11    4.27    0.47 
  -9   8 -11   32.88    2.07 
  -8   8 -11   95.77    6.07 
  -7   8 -11   22.13    1.56 
  -6   8 -11    3.28    0.45 
  -5   8 -11   12.91    0.90 
   1   8 -11    2.71    0.56 
   2   8 -11    0.20    0.38 
   3   8 -11    0.10    0.35 
   4   8 -11    8.34    0.96 
   5   8 -11    2.16    0.47 
   6   8 -11   21.23    1.66 
 -11   9 -11    2.32    0.37 
 -10   9 -11    1.97    0.34 
  -9   9 -11    0.55    0.27 
  -8   9 -11    3.51    0.45 
  -7   9 -11   31.35    2.01 
  -6   9 -11   21.24    1.52 
   1   9 -11    1.11    0.40 
   2   9 -11    6.50    0.76 
   3   9 -11    2.57    0.56 
   4   9 -11   16.10    1.23 
   5   9 -11   28.62    2.59 
 -11  10 -11    0.31    0.24 
 -10  10 -11    3.40    0.45 
  -9  10 -11    0.56    0.26 
  -8  10 -11    0.67    0.28 
  -7  10 -11    2.47    0.43 
  -6  10 -11   11.45    0.91 
   1  10 -11   16.90    1.55 
   2  10 -11    1.35    0.34 
   3  10 -11    2.11    0.40 
   4  10 -11    0.83    0.20 
 -10  11 -11   15.92    1.18 
  -9  11 -11    5.00    0.52 
  -8  11 -11    0.86    0.27 
  -7  11 -11    0.95    0.31 
  -6  11 -11    1.60    0.34 
  -5  11 -11    0.85    0.30 
   1  11 -11    1.49    0.29 
   2  11 -11    0.63    0.21 
   3  11 -11    1.79    0.28 
  -8  12 -11    7.76    0.70 
  -7  12 -11   13.45    1.06 
  -6  12 -11    1.78    0.33 
  -5  12 -11   11.47    0.96 
  11 -13 -10    0.32    0.19 
  12 -13 -10    1.26    0.21 
  13 -13 -10    0.17    0.13 
  -1 -12 -10    1.77    0.33 
   0 -12 -10    3.16    0.41 
   1 -12 -10    8.38    0.94 
  10 -12 -10    4.43    0.53 
  11 -12 -10   12.57    0.92 
  12 -12 -10    1.96    0.20 
  13 -12 -10    5.55    0.31 
  -3 -11 -10    0.65    0.19 
  -2 -11 -10    0.12    0.23 
  -1 -11 -10   12.59    1.19 
   0 -11 -10   11.01    0.96 
   1 -11 -10    0.23    0.28 
   9 -11 -10   11.62    0.91 
  10 -11 -10    8.44    0.39 
  11 -11 -10    9.25    0.41 
  12 -11 -10    9.78    0.41 
  13 -11 -10    2.06    0.20 
  14 -11 -10    0.36    0.09 
  -4 -10 -10   16.83    1.43 
  -3 -10 -10    1.63    0.36 
  -2 -10 -10    6.60    0.69 
  -1 -10 -10    7.31    0.95 
   0 -10 -10    1.23    0.36 
   1 -10 -10    0.41    0.32 
   2 -10 -10   30.75    2.89 
   8 -10 -10    0.66    0.21 
   9 -10 -10    1.05    0.14 
  10 -10 -10    1.34    0.15 
  11 -10 -10    0.74    0.13 
  12 -10 -10    1.04    0.13 
  13 -10 -10    1.47    0.14 
  14 -10 -10    1.25    0.14 
  -5  -9 -10   11.60    0.95 
  -4  -9 -10    5.40    0.71 
  -3  -9 -10    1.35    0.35 
  -2  -9 -10   11.62    1.19 
  -1  -9 -10    0.68    0.36 
   0  -9 -10   30.76    2.76 
   7  -9 -10    1.01    0.22 
   8  -9 -10    2.92    0.27 
   9  -9 -10   31.40    1.42 
  10  -9 -10    0.35    0.12 
  11  -9 -10    2.69    0.19 
  12  -9 -10    0.83    0.11 
  13  -9 -10    6.42    0.25 
  14  -9 -10    0.40    0.08 
  -7  -8 -10    1.07    0.24 
  -6  -8 -10    7.19    0.86 
  -5  -8 -10   36.06    2.90 
  -4  -8 -10    5.26    0.47 
  -3  -8 -10    1.27    0.25 
  -2  -8 -10    0.44    0.23 
  -1  -8 -10    4.79    1.17 
   1  -8 -10  118.62   12.90 
   2  -8 -10   29.98    3.25 
   3  -8 -10    1.66    0.58 
   5  -8 -10   18.39    1.32 
   6  -8 -10   64.97    4.48 
   7  -8 -10   65.54    4.20 
   8  -8 -10    5.11    0.44 
   9  -8 -10   67.07    2.45 
  10  -8 -10   34.11    1.09 
  11  -8 -10    2.18    0.16 
  12  -8 -10    3.27    0.20 
  13  -8 -10    0.37    0.09 
  14  -8 -10    0.03    0.08 
  15  -8 -10    1.17    0.09 
  -7  -7 -10    9.81    0.92 
  -6  -7 -10    2.94    0.48 
  -5  -7 -10   10.50    0.73 
  -4  -7 -10   12.84    0.75 
  -3  -7 -10    3.43    0.37 
  -2  -7 -10    0.60    0.27 
  -1  -7 -10   60.59    6.80 
   0  -7 -10   73.31    6.78 
   1  -7 -10    6.17    1.36 
   2  -7 -10   31.71    3.53 
   3  -7 -10   26.05    2.94 
   4  -7 -10    0.36    0.14 
   5  -7 -10   52.37    2.92 
   6  -7 -10   12.03    0.82 
   7  -7 -10   63.61    4.18 
   8  -7 -10  136.31    8.24 
   9  -7 -10   21.58    1.47 
  10  -7 -10    3.29    0.23 
  11  -7 -10    5.47    0.26 
  12  -7 -10    8.33    0.33 
  13  -7 -10   15.45    0.54 
  14  -7 -10    9.70    0.39 
  15  -7 -10    0.87    0.15 
  -7  -6 -10   15.57    1.45 
  -6  -6 -10   14.98    0.82 
  -5  -6 -10    4.70    0.38 
  -4  -6 -10   28.24    1.52 
  -3  -6 -10    2.24    0.32 
  -2  -6 -10   70.60    3.92 
   0  -6 -10  149.98   14.87 
   1  -6 -10    6.27    0.98 
   2  -6 -10    5.92    0.88 
   3  -6 -10   27.60    2.71 
   4  -6 -10   41.65    4.36 
   5  -6 -10    1.43    0.22 
   6  -6 -10  155.60    9.49 
   7  -6 -10   10.47    0.76 
   8  -6 -10   33.56    1.98 
   9  -6 -10   39.40    2.50 
  10  -6 -10   30.91    1.20 
  11  -6 -10    1.80    0.15 
  12  -6 -10   13.33    0.49 
  13  -6 -10    1.66    0.13 
  14  -6 -10    9.23    0.37 
  -7  -5 -10    7.81    0.68 
  -6  -5 -10    1.59    0.24 
  -5  -5 -10    1.29    0.23 
  -4  -5 -10   34.37    2.14 
  -3  -5 -10   21.01    1.24 
  -2  -5 -10   51.67    3.03 
  -1  -5 -10    1.87    0.76 
   0  -5 -10  283.47   26.98 
   1  -5 -10   23.75    2.30 
   2  -5 -10    5.93    0.90 
   3  -5 -10  129.62   11.79 
   4  -5 -10   33.39    3.23 
   6  -5 -10    4.99    0.42 
   7  -5 -10   34.10    2.17 
   8  -5 -10    1.62    0.26 
   9  -5 -10   18.83    1.36 
  10  -5 -10    1.12    0.14 
  11  -5 -10    3.21    0.21 
  12  -5 -10   12.40    0.44 
  13  -5 -10   32.35    1.25 
  -8  -4 -10    3.61    0.40 
  -7  -4 -10    5.27    0.53 
  -6  -4 -10   32.98    2.18 
  -5  -4 -10   20.78    1.26 
  -4  -4 -10    7.94    0.59 
  -3  -4 -10    0.54    0.20 
  -2  -4 -10   40.00    2.42 
  -1  -4 -10   37.68    3.46 
   0  -4 -10    5.71    1.08 
   1  -4 -10    2.60    0.65 
   2  -4 -10    5.32    0.91 
   3  -4 -10  107.18   10.24 
   4  -4 -10    7.19    0.94 
   7  -4 -10   28.09    1.82 
   8  -4 -10    7.75    0.60 
   9  -4 -10   38.35    2.39 
  10  -4 -10   27.25    1.05 
  11  -4 -10   11.81    0.52 
  12  -4 -10    3.92    0.32 
  13  -4 -10    6.84    0.52 
  14  -4 -10   16.41    1.10 
  -9  -3 -10    1.30    0.27 
  -8  -3 -10    2.11    0.36 
  -7  -3 -10    2.61    0.40 
  -6  -3 -10   37.28    2.23 
  -5  -3 -10    2.18    0.28 
  -4  -3 -10   28.06    1.63 
  -3  -3 -10   23.39    1.47 
  -2  -3 -10  113.63   11.91 
  -1  -3 -10  108.26   10.36 
   0  -3 -10  126.93   12.12 
   1  -3 -10  228.68   20.81 
   2  -3 -10   39.98    3.92 
   3  -3 -10  131.54   12.05 
   7  -3 -10    0.48    0.18 
   8  -3 -10   19.43    1.33 
   9  -3 -10    1.26    0.24 
  10  -3 -10    2.33    0.34 
  11  -3 -10    2.03    0.24 
  12  -3 -10    1.03    0.23 
  13  -3 -10    2.74    0.29 
  14  -3 -10    0.44    0.12 
  -9  -2 -10    1.98    0.37 
  -8  -2 -10   32.57    2.26 
  -6  -2 -10   26.92    1.76 
  -5  -2 -10   34.10    1.94 
  -4  -2 -10    4.11    0.38 
  -3  -2 -10    5.04    0.44 
  -2  -2 -10    9.15    1.16 
  -1  -2 -10   43.15    4.01 
   0  -2 -10    1.00    0.40 
   1  -2 -10   87.11    8.37 
   2  -2 -10    1.48    0.37 
  10  -2 -10    1.08    0.19 
  11  -2 -10   12.70    0.90 
  12  -2 -10    4.99    0.48 
  13  -2 -10    0.11    0.13 
 -10  -1 -10    1.26    0.25 
  -9  -1 -10    0.57    0.24 
  -8  -1 -10   63.29    3.75 
  -7  -1 -10  133.19    7.14 
  -6  -1 -10   13.11    0.73 
  -5  -1 -10    3.99    0.39 
  -4  -1 -10   16.97    1.18 
  -3  -1 -10    1.94    0.66 
  -2  -1 -10  198.12   20.82 
  -1  -1 -10   82.72    8.38 
   0  -1 -10   64.13    6.10 
   1  -1 -10   61.74    6.08 
   2  -1 -10   91.07    8.34 
   9  -1 -10    2.54    0.44 
  10  -1 -10    1.33    0.27 
  11  -1 -10    9.93    0.70 
  12  -1 -10   13.17    0.90 
  13  -1 -10    1.55    0.21 
 -10   0 -10    1.68    0.28 
  -9   0 -10   32.10    2.15 
  -7   0 -10   60.31    3.65 
  -6   0 -10  145.29    8.18 
  -5   0 -10  272.54   14.92 
  -4   0 -10    8.74    0.52 
  -3   0 -10  114.83   12.10 
  -2   0 -10    1.75    0.44 
  -1   0 -10   56.75    6.08 
   0   0 -10   12.04    1.26 
   1   0 -10   60.58    6.05 
 -11   1 -10    9.09    0.69 
 -10   1 -10    1.16    0.27 
  -9   1 -10    3.20    0.42 
  -8   1 -10   66.06    4.34 
  -7   1 -10   13.00    0.86 
  -6   1 -10    1.75    0.29 
  -5   1 -10   26.51    2.08 
  -4   1 -10   99.22   10.28 
  -3   1 -10   30.79    3.89 
  -2   1 -10   82.48    8.34 
  -1   1 -10   63.28    6.06 
   0   1 -10   64.11    6.05 
 -11   2 -10   12.39    0.90 
 -10   2 -10    0.81    0.26 
  -9   2 -10    1.85    0.30 
  -8   2 -10   70.35    4.63 
  -7   2 -10   55.19    3.58 
  -6   2 -10   41.46    2.85 
  -5   2 -10  112.42    7.80 
 -12   3 -10    0.79    0.24 
 -11   3 -10    1.54    0.30 
 -10   3 -10    2.48    0.43 
  -9   3 -10    1.37    0.29 
  -8   3 -10   19.89    1.39 
  -7   3 -10    0.35    0.18 
  -6   3 -10   25.06    1.70 
  -5   3 -10    5.63    0.46 
   8   3 -10    1.67    0.38 
 -12   4 -10    3.45    0.43 
 -11   4 -10   12.28    0.94 
 -10   4 -10   28.24    1.92 
  -9   4 -10   37.52    2.48 
  -8   4 -10    7.64    0.62 
  -7   4 -10   28.54    1.88 
  -6   4 -10    4.83    0.42 
  -5   4 -10   19.48    1.37 
  -4   4 -10    7.64    0.57 
   6   4 -10   33.18    2.83 
   7   4 -10    5.29    0.75 
   8   4 -10    3.47    0.57 
 -12   5 -10   13.53    0.94 
 -11   5 -10    3.24    0.45 
 -10   5 -10    1.10    0.29 
  -9   5 -10   21.02    1.42 
  -8   5 -10    1.67    0.28 
  -7   5 -10   33.35    2.24 
  -6   5 -10    4.43    0.44 
  -5   5 -10  285.89   17.91 
  -4   5 -10   29.14    2.10 
   5   5 -10    1.36    0.43 
   6   5 -10    1.49    0.41 
   7   5 -10    7.57    0.91 
   8   5 -10    0.51    0.24 
   9   5 -10    0.22    0.16 
 -12   6 -10   14.23    1.04 
 -11   6 -10    1.67    0.32 
 -10   6 -10   32.85    2.18 
  -9   6 -10   39.64    2.59 
  -8   6 -10   31.05    2.04 
  -7   6 -10   11.42    0.79 
  -6   6 -10  156.81    9.79 
  -5   6 -10    1.73    0.31 
   4   6 -10   29.86    2.54 
   5   6 -10    4.88    0.75 
   6   6 -10   15.72    1.38 
   7   6 -10   16.67    1.47 
   8   6 -10    0.17    0.18 
 -12   7 -10    9.02    0.70 
 -11   7 -10    5.47    0.55 
 -10   7 -10    3.00    0.44 
  -9   7 -10   24.47    1.53 
  -8   7 -10  138.57    8.50 
  -7   7 -10   63.79    4.32 
  -6   7 -10   13.86    0.89 
  -5   7 -10   58.70    3.60 
   3   7 -10    3.92    0.76 
   4   7 -10   13.24    1.31 
   5   7 -10   10.99    1.25 
   6   7 -10    3.06    0.50 
   7   7 -10    9.81    0.92 
   8   7 -10    0.96    0.21 
 -12   8 -10    3.92    0.44 
 -11   8 -10    2.31    0.39 
 -10   8 -10   35.00    2.28 
  -9   8 -10   70.92    4.44 
  -7   8 -10   71.35    4.35 
  -6   8 -10   72.54    4.65 
   0   8 -10    3.42    0.49 
   2   8 -10    0.60    0.42 
   3   8 -10    1.04    0.43 
   4   8 -10    5.60    0.69 
   5   8 -10   35.72    2.91 
   6   8 -10    8.32    0.87 
 -12   9 -10    0.62    0.26 
 -11   9 -10    2.51    0.41 
 -10   9 -10    0.25    0.26 
  -9   9 -10   31.74    2.16 
  -8   9 -10    3.00    0.44 
  -7   9 -10    1.52    0.32 
  -6   9 -10    1.08    0.31 
   1   9 -10    0.55    0.41 
   2   9 -10   11.87    1.24 
   3   9 -10    1.32    0.37 
   4   9 -10    5.44    0.72 
   5   9 -10   11.02    0.95 
 -11  10 -10    0.53    0.25 
 -10  10 -10    1.61    0.31 
  -9  10 -10    1.03    0.30 
  -8  10 -10    0.40    0.27 
  -7  10 -10    2.84    0.46 
  -6  10 -10   26.17    1.94 
   1  10 -10    8.12    0.97 
   2  10 -10    5.81    0.70 
   3  10 -10    1.98    0.46 
   4  10 -10   16.94    1.43 
 -10  11 -10    9.05    0.71 
  -9  11 -10   12.15    0.92 
  -8  11 -10    1.92    0.33 
  -7  11 -10   12.32    0.96 
  -6  11 -10    3.16    0.49 
   1  11 -10   12.43    1.20 
   2  11 -10    0.04    0.20 
   3  11 -10    0.55    0.18 
  -8  12 -10    3.65    0.45 
  -7  12 -10   12.48    0.96 
  -6  12 -10   12.77    1.05 
  -5  12 -10    7.68    0.72 
  12 -14  -9    0.06    0.13 
   0 -13  -9    0.54    0.16 
  11 -13  -9    0.39    0.20 
  12 -13  -9    0.05    0.18 
  13 -13  -9    0.64    0.15 
  -2 -12  -9    0.01    0.15 
  -1 -12  -9    0.54    0.20 
   0 -12  -9    0.10    0.23 
   1 -12  -9    0.67    0.26 
  10 -12  -9    1.01    0.27 
  11 -12  -9    0.66    0.24 
  12 -12  -9    0.24    0.12 
  13 -12  -9    2.04    0.18 
  14 -12  -9    0.38    0.08 
  -3 -11  -9    2.91    0.37 
  -2 -11  -9    0.33    0.24 
  -1 -11  -9    0.41    0.29 
   0 -11  -9    1.63    0.35 
   1 -11  -9    3.19    0.61 
   9 -11  -9    0.97    0.29 
  10 -11  -9    0.10    0.11 
  11 -11  -9    1.62    0.14 
  12 -11  -9    0.73    0.11 
  13 -11  -9    0.11    0.11 
  14 -11  -9    3.56    0.21 
  -4 -10  -9    0.49    0.23 
  -3 -10  -9    0.61    0.30 
  -2 -10  -9    1.39    0.34 
  -1 -10  -9    0.26    0.32 
   0 -10  -9    0.38    0.31 
   1 -10  -9   11.94    1.21 
   8 -10  -9    0.43    0.20 
   9 -10  -9    2.94    0.22 
  10 -10  -9    0.43    0.13 
  11 -10  -9    3.99    0.26 
  12 -10  -9    0.66    0.12 
  13 -10  -9    5.69    0.26 
  14 -10  -9    0.56    0.11 
  -6  -9  -9    0.42    0.18 
  -5  -9  -9    3.01    0.49 
  -4  -9  -9    1.43    0.34 
  -3  -9  -9    0.98    0.22 
  -2  -9  -9    1.04    0.23 
  -1  -9  -9    2.48    0.35 
   0  -9  -9    0.93    0.37 
   7  -9  -9   15.52    1.16 
   8  -9  -9   11.76    0.81 
   9  -9  -9    1.15    0.24 
  10  -9  -9   12.81    0.52 
  11  -9  -9   12.52    0.45 
  12  -9  -9    2.95    0.19 
  13  -9  -9    2.72    0.17 
  14  -9  -9    0.15    0.08 
  15  -9  -9    0.12    0.07 
  -7  -8  -9    0.03    0.15 
  -6  -8  -9    2.01    0.40 
  -5  -8  -9    0.88    0.33 
  -4  -8  -9   22.02    1.23 
  -3  -8  -9   14.49    0.78 
  -2  -8  -9    1.18    0.25 
  -1  -8  -9    8.74    0.77 
   0  -8  -9   29.33    3.44 
   1  -8  -9    3.55    0.88 
   2  -8  -9    1.80    0.64 
   5  -8  -9    5.84    0.51 
   6  -8  -9    7.39    0.56 
   7  -8  -9    4.72    0.45 
   8  -8  -9   31.95    2.03 
   9  -8  -9   19.30    1.28 
  10  -8  -9    1.31    0.14 
  11  -8  -9   11.77    0.41 
  12  -8  -9    1.69    0.14 
  13  -8  -9    0.18    0.09 
  14  -8  -9    0.28    0.09 
  15  -8  -9    0.08    0.05 
  -7  -7  -9    0.39    0.24 
  -6  -7  -9    6.07    0.77 
  -5  -7  -9    7.05    0.45 
  -4  -7  -9    1.67    0.27 
  -3  -7  -9   12.42    0.78 
  -2  -7  -9   17.72    1.12 
  -1  -7  -9    6.15    0.48 
   0  -7  -9    6.91    1.46 
   1  -7  -9   22.57    1.64 
   2  -7  -9    2.10    0.61 
   3  -7  -9    1.04    0.45 
   4  -7  -9    3.27    0.63 
   5  -7  -9    3.82    0.31 
   6  -7  -9   59.29    3.77 
   7  -7  -9   11.67    0.77 
   8  -7  -9    2.95    0.35 
   9  -7  -9   29.20    1.81 
  10  -7  -9   17.20    0.68 
  11  -7  -9    0.99    0.13 
  12  -7  -9    0.90    0.12 
  13  -7  -9    1.64    0.12 
  14  -7  -9    0.49    0.09 
  15  -7  -9    0.18    0.06 
  -7  -6  -9    2.00    0.36 
  -6  -6  -9    0.85    0.21 
  -5  -6  -9   18.20    1.05 
  -4  -6  -9    3.46    0.42 
  -3  -6  -9    7.72    0.59 
  -2  -6  -9    5.69    0.55 
  -1  -6  -9   58.96    3.29 
   0  -6  -9    3.37    0.81 
   1  -6  -9   96.02    5.28 
   2  -6  -9   18.30    2.09 
   3  -6  -9    0.16    0.34 
   4  -6  -9    3.44    0.73 
   5  -6  -9   71.85    7.20 
   6  -6  -9    2.34    0.30 
   7  -6  -9   24.41    1.51 
   8  -6  -9    2.83    0.34 
   9  -6  -9    0.42    0.22 
  10  -6  -9    5.23    0.30 
  11  -6  -9    6.10    0.28 
  12  -6  -9    1.50    0.13 
  13  -6  -9    6.44    0.26 
  14  -6  -9    1.71    0.14 
  15  -6  -9    0.83    0.12 
  -7  -5  -9    0.58    0.24 
  -6  -5  -9    6.32    0.47 
  -5  -5  -9    1.32    0.28 
  -4  -5  -9    1.39    0.29 
  -3  -5  -9    7.02    0.56 
  -2  -5  -9    4.99    0.40 
  -1  -5  -9   67.75    4.00 
   0  -5  -9   20.27    1.89 
   1  -5  -9   13.55    1.06 
   2  -5  -9   17.94    2.00 
   3  -5  -9    6.56    0.86 
   4  -5  -9   35.07    3.64 
   7  -5  -9    3.38    0.32 
   8  -5  -9    3.58    0.39 
   9  -5  -9    2.35    0.34 
  10  -5  -9    1.01    0.15 
  11  -5  -9   17.90    0.64 
  12  -5  -9    5.38    0.26 
  13  -5  -9    1.62    0.14 
  14  -5  -9    3.46    0.34 
  -8  -4  -9    1.59    0.28 
  -7  -4  -9    1.45    0.28 
  -6  -4  -9    4.88    0.49 
  -5  -4  -9    2.04    0.35 
  -4  -4  -9   -0.18    0.19 
  -3  -4  -9    2.25    0.30 
  -2  -4  -9    5.80    0.41 
  -1  -4  -9   32.66    3.81 
   0  -4  -9  289.89   27.93 
   1  -4  -9   40.30    3.75 
   2  -4  -9    9.38    1.13 
   3  -4  -9    9.00    1.13 
   4  -4  -9  301.08   27.82 
   7  -4  -9    1.19    0.22 
   8  -4  -9   -0.05    0.18 
   9  -4  -9    1.61    0.25 
  10  -4  -9    2.91    0.29 
  11  -4  -9    3.24    0.20 
  12  -4  -9   21.95    1.07 
  13  -4  -9    1.09    0.21 
  14  -4  -9    0.33    0.14 
  -9  -3  -9    3.23    0.38 
  -8  -3  -9    8.72    0.82 
  -7  -3  -9   16.42    1.23 
  -6  -3  -9    0.25    0.21 
  -5  -3  -9    4.39    0.39 
  -4  -3  -9    1.33    0.23 
  -3  -3  -9    0.22    0.16 
  -2  -3  -9    5.31    1.08 
  -1  -3  -9   12.11    1.38 
   0  -3  -9    1.17    0.49 
   1  -3  -9   77.59    7.72 
   2  -3  -9  159.62   13.97 
   3  -3  -9    2.20    0.44 
   7  -3  -9    2.15    0.29 
   8  -3  -9    6.88    0.54 
   9  -3  -9    6.75    0.55 
  10  -3  -9   12.71    0.97 
  11  -3  -9   12.68    0.68 
  12  -3  -9    1.85    0.27 
  13  -3  -9    0.69    0.19 
  14  -3  -9    2.54    0.26 
  -9  -2  -9   12.26    0.92 
  -8  -2  -9    2.66    0.37 
  -7  -2  -9   25.89    1.62 
  -6  -2  -9    2.76    0.34 
  -5  -2  -9    1.91    0.30 
  -4  -2  -9   18.10    1.12 
  -3  -2  -9   19.17    2.19 
  -2  -2  -9    6.91    1.26 
  -1  -2  -9  141.31   14.02 
   0  -2  -9   98.80    9.40 
   1  -2  -9    0.20    0.26 
   2  -2  -9   99.49    9.35 
   7  -2  -9    3.79    0.36 
  10  -2  -9    1.14    0.27 
  11  -2  -9    1.23    0.26 
  12  -2  -9    1.39    0.23 
  13  -2  -9    0.28    0.15 
  14  -2  -9    0.06    0.10 
 -10  -1  -9    4.74    0.44 
  -9  -1  -9   11.48    0.93 
  -8  -1  -9   19.55    1.18 
  -7  -1  -9    2.07    0.34 
  -6  -1  -9   22.49    1.37 
  -5  -1  -9   89.51    5.13 
  -4  -1  -9   15.71    0.86 
  -3  -1  -9   29.96    3.77 
  -2  -1  -9   75.91    7.76 
  -1  -1  -9    0.19    0.30 
   0  -1  -9    3.37    0.54 
   1  -1  -9    3.00    0.49 
   2  -1  -9    0.75    0.25 
  10  -1  -9    2.42    0.43 
  11  -1  -9    0.31    0.22 
  12  -1  -9    0.83    0.19 
  13  -1  -9    0.30    0.12 
 -10   0  -9    0.72    0.24 
  -9   0  -9    1.62    0.29 
  -8   0  -9   30.93    2.10 
  -7   0  -9   11.45    0.73 
  -6   0  -9    2.06    0.29 
  -5   0  -9   12.14    0.88 
  -4   0  -9  264.98   27.93 
  -2   0  -9   85.27    9.37 
  -1   0  -9    2.98    0.53 
   0   0  -9   -0.03    0.20 
   1   0  -9    3.70    0.47 
   9   0  -9    2.06    0.30 
  10   0  -9    0.38    0.23 
  11   0  -9    1.35    0.24 
 -11   1  -9    0.21    0.21 
 -10   1  -9    3.39    0.40 
  -9   1  -9   12.97    0.87 
  -8   1  -9    4.85    0.50 
  -7   1  -9   57.76    3.89 
  -6   1  -9   69.67    4.76 
  -5   1  -9   36.74    2.02 
  -4   1  -9    7.37    1.22 
  -3   1  -9  124.58   13.95 
  -2   1  -9    0.85    0.28 
  -1   1  -9    2.99    0.47 
   0   1  -9    3.32    0.45 
 -11   2  -9    1.03    0.26 
 -10   2  -9    1.21    0.28 
  -9   2  -9   17.33    1.24 
  -8   2  -9    7.55    0.60 
  -7   2  -9    3.34    0.39 
  -6   2  -9    4.67    0.41 
  -5   2  -9    5.92    0.48 
 -12   3  -9    1.52    0.28 
 -11   3  -9   12.10    0.94 
 -10   3  -9   13.40    0.97 
  -9   3  -9    6.48    0.61 
  -8   3  -9    7.10    0.58 
  -7   3  -9    1.95    0.31 
  -6   3  -9    0.48    0.17 
  -5   3  -9   17.04    1.23 
   7   3  -9   16.95    1.62 
   8   3  -9    8.34    1.09 
 -12   4  -9   22.24    1.54 
 -11   4  -9    3.12    0.43 
 -10   4  -9    3.20    0.44 
  -9   4  -9    1.16    0.28 
  -8   4  -9    0.24    0.20 
  -7   4  -9    1.31    0.22 
  -6   4  -9   18.46    1.28 
  -5   4  -9   13.96    0.97 
   7   4  -9    1.69    0.39 
   8   4  -9    1.09    0.34 
 -12   5  -9    5.56    0.56 
 -11   5  -9   19.55    1.34 
 -10   5  -9    1.04    0.29 
  -9   5  -9    2.31    0.37 
  -8   5  -9    3.81    0.40 
  -7   5  -9    2.74    0.34 
  -6   5  -9   94.71    6.11 
  -5   5  -9   13.10    1.02 
  -4   5  -9   38.85    2.40 
   6   5  -9    6.32    0.87 
   7   5  -9    0.66    0.33 
   8   5  -9    0.09    0.24 
   9   5  -9    0.20    0.17 
 -12   6  -9    1.98    0.33 
 -11   6  -9    6.52    0.60 
 -10   6  -9    5.55    0.53 
  -9   6  -9    0.48    0.25 
  -8   6  -9    2.54    0.37 
  -7   6  -9   23.42    1.57 
  -6   6  -9    2.32    0.33 
  -5   6  -9   76.80    4.78 
   5   6  -9   18.81    1.78 
   6   6  -9    1.33    0.40 
   7   6  -9    1.46    0.34 
   8   6  -9    0.20    0.19 
   9   6  -9    0.06    0.12 
 -12   7  -9    0.83    0.28 
 -11   7  -9    0.99    0.29 
 -10   7  -9   18.07    1.25 
  -9   7  -9   28.54    1.88 
  -8   7  -9    2.70    0.40 
  -7   7  -9   12.46    0.82 
  -6   7  -9   60.55    3.90 
  -5   7  -9    3.27    0.41 
   1   7  -9    5.42    0.53 
   3   7  -9   12.60    1.35 
   4   7  -9    1.78    0.50 
   5   7  -9    7.19    0.84 
   6   7  -9    6.68    0.78 
   7   7  -9    0.70    0.23 
   8   7  -9    0.18    0.14 
 -12   8  -9    1.60    0.30 
 -10   8  -9    1.30    0.30 
  -9   8  -9   19.67    1.34 
  -8   8  -9   31.59    2.11 
  -7   8  -9    4.84    0.51 
  -6   8  -9    7.71    0.62 
   0   8  -9   29.71    2.13 
   2   8  -9    1.26    0.44 
   3   8  -9   12.95    1.34 
   4   8  -9   23.20    2.04 
   5   8  -9    1.20    0.35 
   6   8  -9    1.75    0.40 
   7   8  -9    0.27    0.15 
 -12   9  -9    3.19    0.40 
 -11   9  -9   13.22    0.94 
 -10   9  -9   13.50    0.96 
  -9   9  -9    1.22    0.31 
  -8   9  -9   13.40    0.89 
  -7   9  -9   17.64    1.26 
  -6   9  -9    6.53    0.64 
   1   9  -9    2.75    0.55 
   2   9  -9    0.80    0.41 
   3   9  -9    1.49    0.41 
   4   9  -9    1.42    0.33 
   5   9  -9    3.57    0.48 
   6   9  -9    0.72    0.17 
 -11  10  -9    4.61    0.47 
 -10  10  -9    0.03    0.25 
  -9  10  -9    2.95    0.43 
  -8  10  -9    1.26    0.30 
  -7  10  -9   14.14    1.00 
  -6  10  -9    2.53    0.46 
   1  10  -9    0.04    0.35 
   2  10  -9    1.13    0.37 
   3  10  -9    0.68    0.28 
   4  10  -9    0.31    0.21 
 -10  11  -9    0.14    0.24 
  -9  11  -9    1.07    0.29 
  -8  11  -9   11.89    0.97 
  -7  11  -9    3.32    0.47 
  -6  11  -9   18.70    1.36 
   1  11  -9    0.58    0.29 
   2  11  -9    0.19    0.23 
   3  11  -9    2.88    0.37 
  -9  12  -9    1.65    0.29 
  -8  12  -9   21.59    1.56 
  -7  12  -9    5.06    0.57 
  -6  12  -9    1.73    0.33 
  11 -14  -8    0.21    0.16 
  12 -14  -8    0.59    0.16 
   0 -13  -8    0.04    0.15 
  10 -13  -8    3.34    0.41 
  11 -13  -8    0.17    0.20 
  12 -13  -8    0.23    0.19 
  13 -13  -8   -0.05    0.15 
  -2 -12  -8    0.22    0.17 
  -1 -12  -8    0.26    0.20 
   0 -12  -8    2.53    0.41 
   1 -12  -8    6.94    0.77 
   9 -12  -8    2.11    0.31 
  10 -12  -8    1.61    0.30 
  11 -12  -8    4.72    0.48 
  12 -12  -8    2.09    0.21 
  13 -12  -8    3.14    0.22 
  14 -12  -8    0.29    0.08 
  -3 -11  -8   -0.02    0.20 
  -2 -11  -8    0.21    0.24 
  -1 -11  -8    3.27    0.57 
   0 -11  -8    8.74    0.84 
   1 -11  -8    5.16    0.73 
   9 -11  -8   16.23    1.19 
  10 -11  -8    6.55    0.40 
  11 -11  -8    7.50    0.35 
  12 -11  -8    7.28    0.34 
  13 -11  -8    0.69    0.13 
  14 -11  -8    0.23    0.09 
  -5 -10  -8    0.16    0.16 
  -4 -10  -8    0.49    0.25 
  -3 -10  -8    4.64    0.59 
  -2 -10  -8    2.94    0.55 
  -1 -10  -8    5.49    0.48 
   0 -10  -8   10.81    0.64 
   1 -10  -8    9.22    1.13 
   8 -10  -8   40.07    2.69 
   9 -10  -8    1.21    0.15 
  10 -10  -8    9.82    0.43 
  11 -10  -8    5.97    0.31 
  12 -10  -8    2.93    0.22 
  13 -10  -8    0.50    0.11 
  14 -10  -8    2.80    0.21 
  15 -10  -8    0.08    0.07 
  -6  -9  -8    3.08    0.37 
  -5  -9  -8    1.05    0.28 
  -4  -9  -8   -0.11    0.30 
  -3  -9  -8    1.93    0.25 
  -2  -9  -8   17.94    0.97 
  -1  -9  -8    1.87    0.26 
   0  -9  -8    3.44    0.40 
   1  -9  -8    3.16    1.17 
   7  -9  -8    2.44    0.32 
   8  -9  -8   44.95    2.99 
   9  -9  -8    3.96    0.30 
  10  -9  -8   12.13    0.50 
  11  -9  -8    4.55    0.28 
  12  -9  -8   19.79    0.65 
  13  -9  -8   17.64    0.59 
  14  -9  -8    0.34    0.09 
  15  -9  -8    0.35    0.06 
  -7  -8  -8    0.60    0.18 
  -6  -8  -8    0.65    0.27 
  -5  -8  -8    1.02    0.34 
  -4  -8  -8    3.42    0.39 
  -3  -8  -8   16.11    1.00 
  -2  -8  -8   41.64    2.21 
  -1  -8  -8   46.94    2.65 
   0  -8  -8   10.73    0.68 
   1  -8  -8    9.98    0.99 
   2  -8  -8    0.41    0.49 
   6  -8  -8    1.73    0.27 
   7  -8  -8    5.26    0.44 
   8  -8  -8    9.48    0.71 
   9  -8  -8    3.69    0.42 
  10  -8  -8   10.05    0.44 
  11  -8  -8   62.33    2.00 
  12  -8  -8    3.97    0.36 
  13  -8  -8    8.77    0.33 
  14  -8  -8    0.11    0.09 
  15  -8  -8    0.00    0.06 
  -7  -7  -8    8.51    0.86 
  -6  -7  -8    0.83    0.32 
  -5  -7  -8    8.46    0.59 
  -4  -7  -8   14.76    0.80 
  -3  -7  -8    2.58    0.43 
  -2  -7  -8    1.68    0.33 
  -1  -7  -8    4.54    0.46 
   0  -7  -8    0.86    0.21 
   1  -7  -8   16.26    1.29 
   2  -7  -8    7.41    0.83 
   3  -7  -8    5.03    0.84 
   4  -7  -8    6.90    1.01 
   6  -7  -8    2.20    0.30 
   7  -7  -8    0.97    0.22 
   8  -7  -8    8.48    0.66 
   9  -7  -8    0.57    0.24 
  10  -7  -8    0.90    0.14 
  11  -7  -8   22.78    0.75 
  12  -7  -8   26.03    0.89 
  13  -7  -8    2.32    0.16 
  14  -7  -8    8.38    0.36 
  15  -7  -8    0.33    0.07 
  -7  -6  -8    3.67    0.54 
  -6  -6  -8    2.94    0.34 
  -5  -6  -8    0.72    0.22 
  -4  -6  -8   92.30    5.11 
  -3  -6  -8   22.01    1.30 
  -2  -6  -8    2.56    0.35 
  -1  -6  -8    2.80    0.32 
   0  -6  -8    2.92    0.28 
   1  -6  -8    1.81    0.43 
   2  -6  -8   33.91    3.70 
   3  -6  -8   55.62    5.92 
   4  -6  -8    1.28    0.39 
   5  -6  -8   13.48    1.71 
   6  -6  -8    3.13    0.32 
   7  -6  -8   18.07    1.13 
   8  -6  -8    0.68    0.21 
   9  -6  -8    3.77    0.39 
  10  -6  -8    2.11    0.24 
  11  -6  -8    4.36    0.23 
  12  -6  -8    3.16    0.21 
  13  -6  -8    0.65    0.10 
  14  -6  -8    1.28    0.14 
  15  -6  -8    2.49    0.25 
  -7  -5  -8   29.13    1.86 
  -6  -5  -8    2.80    0.33 
  -5  -5  -8    5.00    0.47 
  -4  -5  -8    9.46    0.77 
  -3  -5  -8   32.32    1.92 
  -2  -5  -8    1.27    0.23 
  -1  -5  -8   17.28    0.98 
   0  -5  -8    1.06    0.44 
   1  -5  -8   96.16    5.29 
   2  -5  -8    4.63    0.86 
   3  -5  -8   40.01    4.02 
   4  -5  -8   85.64    8.42 
   7  -5  -8    7.95    0.60 
   8  -5  -8   -0.02    0.18 
   9  -5  -8   24.07    1.63 
  10  -5  -8    3.50    0.42 
  11  -5  -8    1.22    0.13 
  12  -5  -8    9.01    0.35 
  13  -5  -8    1.20    0.15 
  14  -5  -8    1.00    0.18 
  15  -5  -8    0.10    0.10 
  -8  -4  -8    5.33    0.47 
  -7  -4  -8   19.66    1.55 
  -6  -4  -8    1.07    0.27 
  -5  -4  -8   25.16    1.49 
  -4  -4  -8    0.51    0.21 
  -3  -4  -8    8.29    0.57 
  -2  -4  -8    1.16    0.20 
  -1  -4  -8   89.45    8.60 
   0  -4  -8   12.00    0.85 
   1  -4  -8  256.34   14.13 
   2  -4  -8  171.41   16.61 
   3  -4  -8   28.93    2.88 
   4  -4  -8    7.29    0.97 
   7  -4  -8    5.75    0.46 
   8  -4  -8    0.71    0.20 
   9  -4  -8   11.61    0.80 
  10  -4  -8   91.64    4.19 
  11  -4  -8   12.63    0.47 
  12  -4  -8    5.52    0.50 
  13  -4  -8    0.29    0.19 
  14  -4  -8    0.25    0.14 
  -9  -3  -8   18.02    1.35 
  -8  -3  -8   64.91    4.15 
  -7  -3  -8    0.51    0.23 
  -6  -3  -8    3.37    0.38 
  -5  -3  -8    0.15    0.19 
  -4  -3  -8    5.30    0.45 
  -3  -3  -8   56.20    6.13 
  -2  -3  -8   44.99    4.24 
  -1  -3  -8   23.85    2.99 
   0  -3  -8  105.04   10.27 
   1  -3  -8   36.66    4.17 
   2  -3  -8    2.20    0.47 
   3  -3  -8  107.66   10.19 
   8  -3  -8   33.09    2.14 
   9  -3  -8   19.97    1.39 
  10  -3  -8    1.37    0.29 
  11  -3  -8   19.25    1.26 
  12  -3  -8    2.14    0.38 
  13  -3  -8    3.76    0.38 
  14  -3  -8    0.06    0.12 
  -9  -2  -8    5.82    0.48 
  -8  -2  -8    8.95    0.77 
  -7  -2  -8    0.39    0.22 
  -6  -2  -8    0.49    0.21 
  -5  -2  -8    8.49    0.58 
  -4  -2  -8   35.13    2.03 
  -3  -2  -8    8.79    1.19 
  -2  -2  -8  166.78   16.70 
  -1  -2  -8    2.32    0.58 
   0  -2  -8  105.19   10.18 
   1  -2  -8    1.46    0.36 
   2  -2  -8  104.67   10.13 
  10  -2  -8   41.02    2.78 
  11  -2  -8   15.64    1.20 
  12  -2  -8    1.67    0.27 
  13  -2  -8    0.09    0.15 
  14  -2  -8    0.69    0.12 
 -10  -1  -8    6.18    0.53 
  -9  -1  -8   14.05    0.90 
  -8  -1  -8    4.15    0.43 
  -7  -1  -8    8.05    0.62 
  -6  -1  -8   16.70    1.04 
  -5  -1  -8    0.83    0.19 
  -4  -1  -8   85.09    5.18 
  -3  -1  -8  258.44   25.62 
  -2  -1  -8   51.78    4.29 
  -1  -1  -8    1.66    0.43 
   0  -1  -8    6.58    0.83 
   1  -1  -8    7.09    0.79 
   2  -1  -8    1.32    0.33 
  10  -1  -8    1.31    0.28 
  11  -1  -8    7.91    0.59 
  12  -1  -8    4.32    0.40 
  13  -1  -8    0.37    0.13 
 -11   0  -8    7.27    0.61 
 -10   0  -8    9.33    0.75 
  -9   0  -8    4.42    0.46 
  -8   0  -8    7.78    0.67 
  -7   0  -8    0.92    0.22 
  -6   0  -8    2.65    0.30 
  -5   0  -8    1.13    0.19 
  -3   0  -8   97.08   10.26 
  -2   0  -8   96.66   10.17 
  -1   0  -8    6.44    0.82 
   0   0  -8  614.11   60.01 
   1   0  -8    6.42    0.76 
   9   0  -8    4.19    0.49 
  10   0  -8    8.88    0.77 
  11   0  -8    7.40    0.63 
  12   0  -8    1.77    0.28 
 -11   1  -8    7.45    0.58 
 -10   1  -8    1.45    0.28 
  -9   1  -8   45.97    3.10 
  -8   1  -8    5.44    0.49 
  -7   1  -8    2.12    0.33 
  -6   1  -8   14.42    0.96 
  -5   1  -8   80.82    4.67 
  -4   1  -8   27.09    2.96 
  -3   1  -8    3.19    0.55 
  -2   1  -8    1.52    0.34 
  -1   1  -8    7.45    0.77 
   0   1  -8    6.85    0.75 
 -11   2  -8   16.67    1.20 
 -10   2  -8   43.34    2.79 
  -9   2  -8    4.04    0.39 
  -8   2  -8    2.36    0.35 
  -7   2  -8    1.43    0.23 
  -6   2  -8    1.07    0.19 
  -5   2  -8   36.59    2.62 
 -12   3  -8    2.05    0.34 
 -11   3  -8   18.59    1.25 
 -10   3  -8    2.23    0.39 
  -9   3  -8   19.58    1.45 
  -8   3  -8   32.73    2.22 
  -7   3  -8    8.18    0.61 
  -6   3  -8   57.13    3.89 
  -5   3  -8    5.89    0.47 
 -12   4  -8    5.27    0.48 
 -11   4  -8   13.38    0.99 
 -10   4  -8   94.87    6.04 
  -9   4  -8   11.65    0.85 
  -8   4  -8    0.71    0.21 
  -7   4  -8    5.46    0.47 
  -6   4  -8   33.70    2.37 
  -5   4  -8   95.08    6.18 
   2   4  -8    0.72    0.19 
   7   4  -8   18.87    2.02 
   8   4  -8    5.10    0.66 
 -12   5  -8    9.76    0.75 
 -11   5  -8    1.20    0.30 
 -10   5  -8    4.37    0.49 
  -9   5  -8   24.38    1.68 
  -8   5  -8    0.42    0.21 
  -7   5  -8    7.71    0.61 
  -6   5  -8    0.93    0.20 
  -5   5  -8    1.29    0.22 
   2   5  -8    1.24    0.25 
   6   5  -8    3.71    0.74 
   7   5  -8   29.42    2.42 
   8   5  -8    7.25    0.88 
   9   5  -8    0.34    0.19 
 -12   6  -8    3.43    0.45 
 -11   6  -8    4.17    0.49 
 -10   6  -8    1.86    0.32 
  -9   6  -8    3.15    0.41 
  -8   6  -8    0.64    0.23 
  -7   6  -8   17.88    1.17 
  -6   6  -8    3.19    0.36 
  -5   6  -8   14.95    1.12 
   2   6  -8    2.62    0.38 
   5   6  -8    1.02    0.42 
   6   6  -8    3.64    0.68 
   7   6  -8    3.42    0.54 
   8   6  -8    0.10    0.20 
   9   6  -8    0.54    0.13 
 -12   7  -8   27.53    1.87 
 -11   7  -8   23.55    1.57 
 -10   7  -8    0.88    0.28 
  -9   7  -8    0.46    0.26 
  -8   7  -8    8.85    0.70 
  -7   7  -8    0.89    0.24 
  -6   7  -8    2.13    0.36 
   1   7  -8    4.38    0.51 
   5   7  -8    9.03    1.06 
   6   7  -8    1.18    0.35 
   7   7  -8    8.48    0.86 
   8   7  -8    0.03    0.14 
 -12   8  -8    3.95    0.49 
 -11   8  -8   66.16    4.16 
 -10   8  -8    9.99    0.81 
  -9   8  -8    4.26    0.48 
  -8   8  -8    9.27    0.75 
  -7   8  -8    5.65    0.50 
  -6   8  -8    2.04    0.33 
   0   8  -8    9.98    0.80 
   1   8  -8   45.33    3.12 
   3   8  -8   15.40    1.68 
   4   8  -8    3.19    0.61 
   5   8  -8    0.61    0.34 
   6   8  -8    0.75    0.27 
   7   8  -8    0.63    0.17 
 -12   9  -8   20.01    1.37 
 -10   9  -8   12.41    0.91 
  -9   9  -8    4.52    0.49 
  -8   9  -8   48.55    3.11 
  -6   9  -8   20.70    1.48 
   1   9  -8    2.00    0.48 
   2   9  -8   18.01    1.64 
   3   9  -8    2.84    0.49 
   4   9  -8   -0.15    0.29 
   5   9  -8    1.37    0.28 
   6   9  -8    3.10    0.36 
 -11  10  -8    6.50    0.57 
 -10  10  -8    9.71    0.78 
  -9  10  -8    1.45    0.31 
  -8  10  -8   43.33    2.81 
  -7  10  -8    1.47    0.34 
   1  10  -8    6.27    0.89 
   2  10  -8    2.37    0.44 
   3  10  -8    3.62    0.58 
   4  10  -8    0.60    0.23 
   5  10  -8    0.14    0.15 
 -11  11  -8    7.70    0.64 
 -10  11  -8    7.03    0.59 
  -9  11  -8   15.42    1.21 
  -8  11  -8   18.76    1.28 
  -7  11  -8   12.75    1.02 
  -6  11  -8    0.90    0.33 
   1  11  -8    3.46    0.59 
   2  11  -8    0.18    0.25 
   3  11  -8    0.09    0.19 
  -9  12  -8    1.65    0.31 
  -8  12  -8    4.48    0.51 
  -7  12  -8    8.97    0.77 
  -6  12  -8    2.69    0.47 
   2  12  -8    0.29    0.16 
  11 -14  -7    0.57    0.18 
  12 -14  -7    4.50    0.38 
   0 -13  -7    0.20    0.16 
  10 -13  -7    0.52    0.22 
  11 -13  -7    3.72    0.42 
  12 -13  -7    0.58    0.20 
  13 -13  -7    0.19    0.16 
  -2 -12  -7    4.62    0.47 
  -1 -12  -7    0.32    0.22 
   0 -12  -7    4.13    0.54 
   1 -12  -7    0.62    0.28 
   9 -12  -7    0.37    0.25 
  10 -12  -7    2.97    0.44 
  11 -12  -7    2.51    0.42 
  12 -12  -7    4.50    0.46 
  13 -12  -7    0.18    0.11 
  14 -12  -7    1.97    0.16 
  -3 -11  -7    0.44    0.22 
  -2 -11  -7    4.39    0.54 
  -1 -11  -7    3.96    0.55 
   0 -11  -7   14.48    0.96 
   1 -11  -7    4.36    0.61 
   8 -11  -7    0.50    0.26 
   9 -11  -7    4.45    0.51 
  10 -11  -7    9.95    0.56 
  11 -11  -7   16.85    0.66 
  12 -11  -7    0.37    0.11 
  13 -11  -7    2.68    0.24 
  14 -11  -7    0.21    0.10 
  -5 -10  -7    0.75    0.19 
  -4 -10  -7    2.07    0.40 
  -3 -10  -7    1.21    0.33 
  -2 -10  -7    2.10    0.30 
  -1 -10  -7   10.58    0.67 
   0 -10  -7    3.27    0.40 
   1 -10  -7    8.35    0.56 
   9 -10  -7   46.19    2.13 
  10 -10  -7    4.12    0.27 
  11 -10  -7    3.77    0.26 
  12 -10  -7    1.48    0.15 
  13 -10  -7    0.82    0.11 
  14 -10  -7    4.63    0.28 
  15 -10  -7    0.16    0.07 
  -6  -9  -7    3.43    0.47 
  -5  -9  -7   10.19    0.94 
  -4  -9  -7    0.14    0.30 
  -3  -9  -7    0.19    0.19 
  -2  -9  -7    3.48    0.40 
  -1  -9  -7   44.10    2.46 
   0  -9  -7   21.99    1.55 
   1  -9  -7    8.55    0.66 
   2  -9  -7   13.17    1.71 
   7  -9  -7   29.51    2.15 
   8  -9  -7    3.96    0.37 
   9  -9  -7   22.26    1.47 
  10  -9  -7    8.04    0.39 
  11  -9  -7   12.45    0.51 
  12  -9  -7   25.07    0.93 
  13  -9  -7    1.04    0.11 
  14  -9  -7   13.39    0.52 
  15  -9  -7    0.55    0.07 
  -7  -8  -7    7.94    0.82 
  -6  -8  -7   17.54    1.50 
  -5  -8  -7    0.50    0.32 
  -4  -8  -7    5.01    0.40 
  -3  -8  -7    1.25    0.25 
  -2  -8  -7    0.55    0.23 
  -1  -8  -7    2.52    0.42 
   0  -8  -7    4.31    0.40 
   1  -8  -7    4.98    0.41 
   2  -8  -7   24.39    1.83 
   6  -8  -7   40.55    2.69 
   7  -8  -7   12.54    0.92 
   8  -8  -7    5.45    0.44 
   9  -8  -7    9.64    0.69 
  10  -8  -7   24.91    0.99 
  11  -8  -7    1.78    0.18 
  12  -8  -7   68.64    2.18 
  13  -8  -7   16.18    0.55 
  14  -8  -7    1.11    0.11 
  15  -8  -7    1.75    0.12 
  -7  -7  -7    1.84    0.41 
  -6  -7  -7    0.97    0.33 
  -5  -7  -7    0.91    0.23 
  -4  -7  -7   24.35    1.50 
  -3  -7  -7   59.24    3.36 
  -2  -7  -7   34.07    1.95 
  -1  -7  -7   14.11    0.88 
   0  -7  -7   39.41    1.72 
   1  -7  -7   41.26    1.88 
   2  -7  -7    3.25    0.49 
   3  -7  -7    4.18    0.71 
   4  -7  -7   13.26    1.53 
   6  -7  -7    1.88    0.24 
   7  -7  -7   39.25    2.38 
   8  -7  -7    5.20    0.47 
   9  -7  -7   12.92    0.94 
  10  -7  -7   19.38    1.27 
  11  -7  -7   22.86    0.80 
  12  -7  -7   18.48    0.60 
  13  -7  -7    9.52    0.35 
  14  -7  -7    1.46    0.13 
  15  -7  -7    8.85    0.42 
  -7  -6  -7    8.65    0.96 
  -6  -6  -7    0.80    0.21 
  -5  -6  -7   22.29    1.27 
  -4  -6  -7    2.85    0.44 
  -3  -6  -7   55.59    3.41 
  -2  -6  -7   41.84    2.39 
  -1  -6  -7    1.37    0.24 
   0  -6  -7   16.04    0.81 
   1  -6  -7    1.89    0.22 
   2  -6  -7    3.02    0.46 
   3  -6  -7   43.89    3.12 
   4  -6  -7   73.26    7.59 
   7  -6  -7   42.51    2.67 
   8  -6  -7   27.17    1.75 
   9  -6  -7    0.14    0.20 
  10  -6  -7    5.00    0.45 
  11  -6  -7   25.98    0.90 
  12  -6  -7    0.77    0.12 
  13  -6  -7    1.04    0.11 
  14  -6  -7   15.38    0.77 
  15  -6  -7    4.22    0.23 
  -7  -5  -7   14.47    0.98 
  -6  -5  -7   28.33    1.49 
  -5  -5  -7   36.21    2.23 
  -4  -5  -7   41.28    2.31 
  -3  -5  -7    2.23    0.32 
  -2  -5  -7    4.05    0.42 
  -1  -5  -7   15.03    0.80 
   0  -5  -7   16.16    1.18 
   1  -5  -7    2.92    0.48 
   2  -5  -7  126.86    6.03 
   3  -5  -7   35.10    3.61 
   4  -5  -7   44.04    4.58 
   7  -5  -7    3.98    0.35 
   8  -5  -7    6.18    0.48 
   9  -5  -7    6.74    0.53 
  10  -5  -7   38.48    2.50 
  11  -5  -7   22.40    0.77 
  12  -5  -7    1.88    0.14 
  13  -5  -7    0.43    0.13 
  14  -5  -7    9.83    0.71 
  15  -5  -7    0.36    0.11 
  -8  -4  -7   65.68    4.54 
  -7  -4  -7   26.80    1.66 
  -6  -4  -7    3.97    0.44 
  -5  -4  -7    6.04    0.52 
  -4  -4  -7    5.21    0.44 
  -3  -4  -7   12.04    0.84 
  -2  -4  -7   76.33    4.24 
  -1  -4  -7   51.92    4.80 
   0  -4  -7  193.80   10.40 
   1  -4  -7   13.93    0.96 
   2  -4  -7   98.29    5.97 
   3  -4  -7   98.97    9.70 
   4  -4  -7  191.32   18.60 
   8  -4  -7    4.77    0.43 
   9  -4  -7   37.50    2.57 
  10  -4  -7    5.11    0.43 
  11  -4  -7   28.96    0.91 
  12  -4  -7    3.91    0.32 
  13  -4  -7    0.21    0.19 
  14  -4  -7    1.69    0.27 
  -9  -3  -7   26.00    1.70 
  -8  -3  -7    2.67    0.36 
  -7  -3  -7   17.91    1.16 
  -6  -3  -7   -0.15    0.19 
  -5  -3  -7    5.00    0.46 
  -4  -3  -7    3.80    0.36 
  -3  -3  -7   46.28    2.61 
  -2  -3  -7   30.85    3.77 
  -1  -3  -7  107.16    9.85 
   0  -3  -7   51.03    2.89 
   1  -3  -7  224.90   12.36 
   2  -3  -7   33.36    3.38 
   3  -3  -7   51.24    5.02 
   8  -3  -7    1.81    0.25 
   9  -3  -7   63.82    3.88 
  10  -3  -7   56.57    3.92 
  11  -3  -7    1.40    0.28 
  12  -3  -7    0.38    0.23 
  13  -3  -7    0.84    0.20 
  14  -3  -7    0.38    0.14 
 -10  -2  -7    1.24    0.25 
  -9  -2  -7   11.63    0.91 
  -8  -2  -7   27.78    1.78 
  -7  -2  -7   13.08    0.88 
  -6  -2  -7   26.45    1.57 
  -5  -2  -7    3.16    0.33 
  -4  -2  -7    4.04    0.33 
  -3  -2  -7  131.23   13.21 
  -2  -2  -7  120.88   10.89 
  -1  -2  -7   33.84    3.47 
   0  -2  -7   20.42    2.36 
   1  -2  -7   15.96    1.61 
   2  -2  -7   23.23    2.32 
  10  -2  -7    1.34    0.27 
  11  -2  -7    4.37    0.49 
  12  -2  -7    3.16    0.40 
  13  -2  -7    3.93    0.38 
  14  -2  -7    3.93    0.34 
 -10  -1  -7    3.63    0.42 
  -9  -1  -7    7.82    0.67 
  -8  -1  -7    8.34    0.65 
  -7  -1  -7    5.82    0.46 
  -6  -1  -7   40.05    2.35 
  -5  -1  -7    1.72    0.24 
  -4  -1  -7    1.12    0.64 
  -3  -1  -7    9.58    1.57 
  -2  -1  -7  219.11   22.42 
  -1  -1  -7   14.62    1.64 
   0  -1  -7  176.91   18.09 
   1  -1  -7  184.43   18.07 
   2  -1  -7   14.40    1.55 
  10  -1  -7   48.15    3.10 
  11  -1  -7   10.96    0.82 
  12  -1  -7    2.78    0.37 
  13  -1  -7    0.70    0.15 
 -11   0  -7   18.38    1.20 
 -10   0  -7    4.56    0.47 
  -9   0  -7   21.66    1.51 
  -8   0  -7    4.55    0.42 
  -7   0  -7   34.55    2.09 
  -6   0  -7   13.47    0.93 
  -5   0  -7   13.59    0.92 
  -4   0  -7  176.46   18.74 
  -3   0  -7   50.07    5.13 
  -2   0  -7   22.40    2.37 
  -1   0  -7  175.78   18.08 
   0   0  -7   -0.01    0.19 
   1   0  -7  195.13   18.06 
   9   0  -7   20.15    1.51 
  10   0  -7    5.29    0.50 
  11   0  -7   18.96    1.19 
  12   0  -7    4.62    0.41 
 -11   1  -7   10.30    0.80 
 -10   1  -7   49.51    3.11 
  -9   1  -7    4.50    0.43 
  -8   1  -7   11.84    0.96 
  -7   1  -7    1.07    0.22 
  -6   1  -7   15.45    0.92 
  -5   1  -7   40.86    2.54 
  -4   1  -7   79.24    9.75 
  -3   1  -7   30.30    3.40 
   0   1  -7  199.72   18.06 
 -12   2  -7    2.83    0.35 
 -11   2  -7    4.66    0.46 
 -10   2  -7    1.12    0.27 
  -9   2  -7   32.89    2.24 
  -8   2  -7   43.97    2.79 
  -7   2  -7    5.69    0.44 
  -6   2  -7   72.85    5.03 
   2   2  -7  110.10    7.04 
 -12   3  -7    0.34    0.23 
 -11   3  -7    1.29    0.29 
 -10   3  -7   59.66    3.94 
  -9   3  -7   62.06    4.01 
  -8   3  -7    1.31    0.25 
  -7   3  -7   13.87    0.94 
  -6   3  -7   44.56    3.06 
   2   3  -7   31.52    2.33 
 -12   4  -7    4.21    0.46 
 -11   4  -7   29.54    1.91 
 -10   4  -7    4.97    0.49 
  -9   4  -7   38.48    2.66 
  -8   4  -7    4.84    0.46 
  -7   4  -7    3.92    0.38 
  -6   4  -7    3.71    0.34 
  -5   4  -7    1.79    0.25 
   2   4  -7   75.90    4.99 
   7   4  -7   25.84    2.18 
   8   4  -7   60.81    5.80 
 -12   5  -7    1.94    0.31 
 -11   5  -7   24.01    1.61 
 -10   5  -7   40.93    2.60 
  -9   5  -7    6.49    0.57 
  -8   5  -7    5.72    0.50 
  -7   5  -7    3.38    0.35 
  -6   5  -7    2.01    0.28 
  -5   5  -7   15.98    1.08 
   2   5  -7    4.19    0.34 
   6   5  -7   28.18    2.48 
   7   5  -7   14.74    1.63 
   8   5  -7   17.12    1.49 
 -12   6  -7    0.43    0.26 
 -11   6  -7   28.45    1.89 
 -10   6  -7    4.90    0.49 
  -9   6  -7    0.34    0.24 
  -8   6  -7   27.59    1.81 
  -7   6  -7   41.96    2.75 
  -6   6  -7   15.04    1.08 
  -5   6  -7   17.23    1.07 
   1   6  -7    1.21    0.27 
   2   6  -7   37.44    2.15 
   6   6  -7    0.53    0.38 
   7   6  -7    9.34    0.99 
   8   6  -7    0.73    0.25 
   9   6  -7    0.55    0.16 
 -12   7  -7   18.75    1.26 
 -11   7  -7   25.18    1.67 
 -10   7  -7   19.50    1.32 
  -9   7  -7   13.55    0.98 
  -8   7  -7    5.65    0.51 
  -7   7  -7   38.15    2.46 
  -6   7  -7    1.65    0.26 
   1   7  -7   13.58    1.00 
   2   7  -7   31.82    2.26 
   5   7  -7    0.95    0.42 
   6   7  -7    1.03    0.36 
   7   7  -7    1.57    0.30 
   8   7  -7    1.42    0.29 
 -12   8  -7   72.53    4.56 
 -11   8  -7    1.59    0.31 
 -10   8  -7   29.27    1.80 
  -9   8  -7    9.08    0.72 
  -8   8  -7    4.85    0.48 
  -7   8  -7   12.87    0.98 
  -6   8  -7   46.83    2.82 
   0   8  -7    3.60    0.50 
   1   8  -7    2.10    0.41 
   4   8  -7    4.61    0.79 
   5   8  -7    0.46    0.35 
   6   8  -7   17.69    1.51 
   7   8  -7    8.66    0.83 
 -12   9  -7   25.25    1.70 
 -11   9  -7   13.00    0.93 
 -10   9  -7    8.36    0.70 
  -9   9  -7   21.43    1.53 
  -8   9  -7    4.73    0.47 
  -7   9  -7   32.62    2.25 
   0   9  -7   22.97    1.58 
   3   9  -7    0.12    0.38 
   4   9  -7    0.19    0.34 
   5   9  -7    9.41    0.96 
   6   9  -7    4.22    0.48 
 -12  10  -7    1.36    0.28 
 -11  10  -7    3.74    0.46 
 -10  10  -7    4.97    0.50 
  -9  10  -7   48.50    3.12 
  -8  10  -7    1.01    0.31 
  -7  10  -7   61.19    3.96 
   1  10  -7   11.88    1.18 
   2  10  -7    2.37    0.48 
   3  10  -7    0.76    0.33 
   4  10  -7    1.56    0.31 
   5  10  -7    0.49    0.18 
 -11  11  -7   17.50    1.21 
 -10  11  -7    9.93    0.82 
  -9  11  -7    4.61    0.49 
  -8  11  -7    0.89    0.31 
  -7  11  -7   28.78    1.93 
   1  11  -7    3.18    0.59 
   2  11  -7    3.80    0.57 
   3  11  -7    0.23    0.21 
 -10  12  -7    2.76    0.38 
  -9  12  -7    0.29    0.25 
  -8  12  -7    4.31    0.51 
  -7  12  -7    1.53    0.33 
  -6  12  -7    0.14    0.28 
   1  12  -7    0.16    0.21 
   2  12  -7    3.92    0.46 
  11 -14  -6    1.04    0.20 
  12 -14  -6    0.25    0.16 
   0 -13  -6    0.26    0.17 
  10 -13  -6    0.04    0.21 
  11 -13  -6   -0.07    0.20 
  12 -13  -6    0.39    0.20 
  13 -13  -6    0.55    0.18 
  -2 -12  -6    0.49    0.19 
  -1 -12  -6    0.31    0.23 
   0 -12  -6    0.39    0.25 
   1 -12  -6    1.68    0.36 
   9 -12  -6    1.66    0.29 
  10 -12  -6    1.87    0.30 
  11 -12  -6    5.87    0.55 
  12 -12  -6    1.06    0.25 
  13 -12  -6    1.50    0.16 
  14 -12  -6    0.25    0.09 
  -4 -11  -6    0.85    0.19 
  -3 -11  -6    1.14    0.26 
  -2 -11  -6    0.09    0.26 
  -1 -11  -6    5.55    0.71 
   0 -11  -6    1.67    0.25 
   1 -11  -6    2.82    0.35 
   2 -11  -6    0.78    0.30 
   8 -11  -6   11.51    0.90 
   9 -11  -6    0.04    0.25 
  10 -11  -6    0.72    0.28 
  11 -11  -6    1.63    0.15 
  12 -11  -6    1.90    0.17 
  13 -11  -6    0.99    0.11 
  14 -11  -6    0.14    0.10 
  15 -11  -6    0.01    0.08 
  -5 -10  -6    5.66    0.55 
  -4 -10  -6    0.41    0.25 
  -3 -10  -6    0.27    0.28 
  -2 -10  -6    1.89    0.25 
  -1 -10  -6    0.83    0.23 
   0 -10  -6    2.51    0.30 
   1 -10  -6   -0.03    0.20 
   2 -10  -6    0.24    0.25 
   3 -10  -6    1.00    0.28 
   9 -10  -6    1.38    0.27 
  10 -10  -6    2.68    0.22 
  11 -10  -6    2.90    0.23 
  12 -10  -6    3.88    0.25 
  13 -10  -6    0.48    0.11 
  14 -10  -6    0.24    0.11 
  15 -10  -6    0.38    0.08 
  -6  -9  -6    6.07    0.58 
  -5  -9  -6    0.13    0.25 
  -4  -9  -6   -0.11    0.30 
  -3  -9  -6    1.84    0.25 
  -2  -9  -6    0.13    0.21 
  -1  -9  -6    2.16    0.28 
   0  -9  -6    6.89    0.61 
   1  -9  -6    6.22    0.55 
   2  -9  -6    2.03    0.34 
   3  -9  -6    8.04    0.62 
   8  -9  -6    4.72    0.44 
   9  -9  -6    6.52    0.59 
  10  -9  -6    0.09    0.16 
  11  -9  -6    0.66    0.15 
  12  -9  -6    6.40    0.32 
  13  -9  -6   14.78    0.58 
  14  -9  -6    1.18    0.14 
  15  -9  -6    0.02    0.08 
  -7  -8  -6    1.69    0.31 
  -6  -8  -6    0.45    0.27 
  -5  -8  -6    0.56    0.33 
  -4  -8  -6    4.03    0.43 
  -3  -8  -6   11.69    0.75 
  -2  -8  -6    3.22    0.47 
  -1  -8  -6    4.05    0.47 
   0  -8  -6   14.85    0.82 
   1  -8  -6    2.90    0.34 
   2  -8  -6   17.95    0.99 
   3  -8  -6    2.10    0.66 
   6  -8  -6    2.90    0.32 
   7  -8  -6   19.57    1.32 
   8  -8  -6   14.34    0.98 
   9  -8  -6    7.66    0.57 
  10  -8  -6    0.18    0.16 
  11  -8  -6    5.99    0.28 
  12  -8  -6   14.86    0.55 
  13  -8  -6    4.24    0.21 
  14  -8  -6    1.63    0.13 
  15  -8  -6    0.08    0.08 
  -7  -7  -6   -0.11    0.25 
  -6  -7  -6    1.23    0.22 
  -5  -7  -6   16.19    0.95 
  -4  -7  -6   12.81    0.69 
  -3  -7  -6    0.94    0.31 
  -2  -7  -6   10.26    0.82 
  -1  -7  -6   18.44    1.04 
   0  -7  -6   10.17    0.60 
   1  -7  -6    7.81    0.49 
   2  -7  -6    7.78    0.48 
   3  -7  -6   12.90    0.94 
   6  -7  -6    1.03    0.21 
   7  -7  -6   10.61    0.70 
   8  -7  -6    2.93    0.34 
   9  -7  -6    2.60    0.35 
  10  -7  -6    1.23    0.26 
  11  -7  -6   18.88    0.64 
  12  -7  -6   23.73    0.80 
  13  -7  -6    0.14    0.10 
  14  -7  -6   -0.02    0.08 
  15  -7  -6    1.00    0.12 
  -7  -6  -6    0.35    0.18 
  -6  -6  -6    8.07    0.54 
  -5  -6  -6    1.44    0.25 
  -4  -6  -6   10.61    0.77 
  -3  -6  -6    6.55    0.56 
  -2  -6  -6    3.44    0.38 
  -1  -6  -6    0.50    0.20 
   0  -6  -6    8.00    0.53 
   1  -6  -6    0.18    0.13 
   2  -6  -6    7.98    0.67 
   3  -6  -6    0.58    0.28 
   4  -6  -6    0.68    0.32 
   7  -6  -6    8.84    0.61 
   8  -6  -6   19.89    1.27 
   9  -6  -6    9.68    0.68 
  10  -6  -6    4.04    0.45 
  11  -6  -6    6.87    0.33 
  12  -6  -6    7.89    0.33 
  13  -6  -6    1.86    0.15 
  14  -6  -6    0.73    0.12 
  15  -6  -6    5.14    0.28 
  -7  -5  -6   24.11    1.31 
  -6  -5  -6    5.67    0.47 
  -5  -5  -6    8.04    0.61 
  -4  -5  -6    2.46    0.37 
  -3  -5  -6    9.19    0.65 
  -2  -5  -6   14.78    0.96 
  -1  -5  -6    3.19    0.28 
   0  -5  -6    6.16    0.65 
   1  -5  -6   24.05    1.32 
   2  -5  -6    0.69    0.27 
   3  -5  -6   20.11    1.18 
   4  -5  -6   57.01    6.19 
   8  -5  -6    2.57    0.34 
   9  -5  -6    1.84    0.31 
  10  -5  -6    6.87    0.61 
  11  -5  -6    2.87    0.20 
  12  -5  -6   16.78    0.66 
  13  -5  -6    1.21    0.12 
  14  -5  -6    0.05    0.10 
  15  -5  -6    5.25    0.40 
  -8  -4  -6   18.10    1.15 
  -7  -4  -6   17.59    1.32 
  -6  -4  -6    4.42    0.43 
  -5  -4  -6    1.63    0.27 
  -4  -4  -6   22.08    1.36 
  -3  -4  -6    0.37    0.18 
  -2  -4  -6    1.18    0.20 
  -1  -4  -6   73.42    3.66 
   0  -4  -6   11.11    0.88 
   1  -4  -6   15.91    0.91 
   2  -4  -6  113.41    5.34 
   3  -4  -6   57.11    3.67 
   4  -4  -6    9.96    1.12 
   8  -4  -6   23.72    1.51 
   9  -4  -6    3.08    0.35 
  10  -4  -6   10.46    0.78 
  11  -4  -6    9.86    0.46 
  12  -4  -6    6.32    0.36 
  13  -4  -6   -0.21    0.19 
  14  -4  -6    0.17    0.16 
  15  -4  -6    0.68    0.12 
  -9  -3  -6    5.72    0.55 
  -8  -3  -6    5.98    0.56 
  -7  -3  -6    1.48    0.27 
  -6  -3  -6    8.11    0.64 
  -5  -3  -6    3.41    0.32 
  -4  -3  -6   14.68    0.91 
  -3  -3  -6    0.68    0.18 
  -2  -3  -6   24.94    2.60 
  -1  -3  -6   64.93    3.40 
   0  -3  -6   70.57    3.81 
   1  -3  -6   15.02    1.13 
   2  -3  -6    0.95    0.28 
   3  -3  -6   63.80    6.68 
   8  -3  -6    9.43    0.66 
   9  -3  -6    6.67    0.55 
  10  -3  -6    2.40    0.32 
  11  -3  -6   12.19    0.93 
  12  -3  -6    1.79    0.29 
  13  -3  -6   -0.06    0.18 
  14  -3  -6    0.81    0.17 
 -10  -2  -6    3.67    0.41 
  -9  -2  -6    0.94    0.26 
  -8  -2  -6    0.20    0.21 
  -7  -2  -6    2.53    0.34 
  -6  -2  -6   17.68    1.15 
  -5  -2  -6    8.73    0.60 
  -4  -2  -6    7.31    0.55 
  -3  -2  -6    1.55    0.62 
  -2  -2  -6  122.06   11.74 
  -1  -2  -6    1.18    0.44 
   0  -2  -6  117.31   10.86 
   1  -2  -6   24.43    2.46 
   2  -2  -6  110.07   10.80 
  10  -2  -6    4.38    0.49 
  11  -2  -6    0.19    0.23 
  12  -2  -6    1.83    0.28 
  13  -2  -6    0.28    0.17 
  14  -2  -6    0.28    0.12 
 -10  -1  -6    3.07    0.39 
  -9  -1  -6    0.25    0.23 
  -8  -1  -6    5.54    0.53 
  -7  -1  -6    1.95    0.32 
  -6  -1  -6    8.25    0.58 
  -5  -1  -6    0.17    0.14 
  -4  -1  -6   20.32    2.67 
  -3  -1  -6   12.80    1.80 
  -2  -1  -6   21.90    2.07 
  -1  -1  -6   21.70    2.50 
   0  -1  -6    5.34    0.83 
   1  -1  -6    6.20    0.79 
   2  -1  -6   26.26    2.43 
  10  -1  -6    1.52    0.30 
  11  -1  -6    0.64    0.24 
  12  -1  -6    6.78    0.53 
  13  -1  -6    0.32    0.15 
 -11   0  -6    2.16    0.33 
 -10   0  -6    3.08    0.39 
  -9   0  -6    8.25    0.59 
  -8   0  -6   12.49    0.90 
  -7   0  -6    8.43    0.65 
  -6   0  -6    9.17    0.60 
  -5   0  -6    6.80    0.47 
  -4   0  -6    6.31    1.29 
  -3   0  -6   59.30    6.77 
  -2   0  -6   95.23   10.84 
   1   0  -6    8.70    0.77 
  10   0  -6    2.90    0.44 
  11   0  -6    1.77    0.27 
  12   0  -6    1.16    0.20 
  13   0  -6    0.55    0.12 
 -11   1  -6    0.66    0.24 
 -10   1  -6    1.62    0.30 
  -9   1  -6    4.24    0.46 
  -8   1  -6   21.30    1.22 
  -7   1  -6    1.42    0.22 
  -6   1  -6    1.77    0.30 
  -4   1  -6   53.25    5.86 
  -3   1  -6    0.53    0.34 
   3   1  -6   14.93    1.26 
  10   1  -6    3.25    0.43 
 -12   2  -6    1.99    0.32 
 -11   2  -6    0.20    0.23 
 -10   2  -6    4.52    0.47 
  -9   2  -6   12.31    0.90 
  -8   2  -6    2.95    0.38 
  -7   2  -6   14.78    1.07 
  -6   2  -6    0.86    0.17 
  -5   2  -6   19.20    2.49 
  -4   2  -6  103.49   11.61 
   2   2  -6  118.54    7.62 
   3   2  -6    1.16    0.14 
 -12   3  -6    1.41    0.28 
 -11   3  -6   12.35    0.92 
 -10   3  -6    2.22    0.33 
  -9   3  -6    6.47    0.58 
  -8   3  -6    9.14    0.69 
  -7   3  -6    0.76    0.18 
  -6   3  -6    1.03    0.18 
   2   3  -6   22.91    1.53 
   3   3  -6    0.81    0.14 
 -12   4  -6    5.87    0.53 
 -11   4  -6    9.78    0.84 
 -10   4  -6   11.26    0.84 
  -9   4  -6    3.36    0.39 
  -8   4  -6   22.35    1.55 
  -7   4  -6   14.60    1.01 
  -6   4  -6    7.77    0.61 
   2   4  -6    0.93    0.15 
   3   4  -6    0.24    0.19 
   7   4  -6   17.36    1.75 
   8   4  -6   15.84    1.51 
 -12   5  -6   17.18    1.20 
 -11   5  -6    2.71    0.42 
 -10   5  -6    7.98    0.65 
  -9   5  -6    1.54    0.28 
  -8   5  -6    3.09    0.34 
  -7   5  -6    8.61    0.65 
  -6   5  -6    0.20    0.16 
  -5   5  -6    7.52    0.52 
   2   5  -6   15.27    0.85 
   3   5  -6    8.50    0.71 
   7   5  -6   23.79    2.19 
   8   5  -6    2.90    0.58 
 -13   6  -6    2.32    0.36 
 -12   6  -6    8.12    0.69 
 -11   6  -6    7.44    0.62 
 -10   6  -6    4.00    0.47 
  -9   6  -6    8.94    0.71 
  -8   6  -6   19.08    1.31 
  -7   6  -6    8.41    0.64 
  -6   6  -6    9.64    0.67 
   1   6  -6    0.51    0.16 
   2   6  -6    3.21    0.31 
   3   6  -6    7.01    0.62 
   6   6  -6    8.44    1.00 
   7   6  -6    0.25    0.32 
   8   6  -6    1.36    0.29 
 -13   7  -6    0.05    0.23 
 -12   7  -6   24.39    1.67 
 -11   7  -6   19.03    1.34 
 -10   7  -6    1.33    0.29 
  -9   7  -6    2.99    0.40 
  -8   7  -6    2.45    0.35 
  -7   7  -6    9.69    0.73 
  -6   7  -6    1.09    0.24 
   1   7  -6   17.96    1.40 
   2   7  -6   10.21    0.91 
   6   7  -6    1.21    0.41 
   7   7  -6    0.25    0.25 
   8   7  -6    0.28    0.16 
 -12   8  -6   15.49    1.15 
 -11   8  -6    6.53    0.59 
 -10   8  -6    0.41    0.26 
  -9   8  -6    6.79    0.59 
  -8   8  -6   13.01    1.02 
  -7   8  -6   21.89    1.39 
  -6   8  -6    3.17    0.40 
   0   8  -6   16.43    1.09 
   1   8  -6    4.72    0.53 
   2   8  -6    3.22    0.50 
   5   8  -6    0.62    0.38 
   6   8  -6    0.55    0.29 
   7   8  -6    1.56    0.32 
 -12   9  -6    5.76    0.56 
 -11   9  -6    0.65    0.27 
 -10   9  -6    0.11    0.26 
  -9   9  -6    8.29    0.65 
  -8   9  -6    3.97    0.49 
  -7   9  -6   14.26    0.93 
   0   9  -6    7.39    0.70 
   4   9  -6   -0.42    0.33 
   5   9  -6   -0.14    0.26 
   6   9  -6    6.37    0.59 
 -12  10  -6    3.70    0.43 
 -11  10  -6    3.15    0.43 
 -10  10  -6    3.37    0.43 
  -9  10  -6    1.64    0.32 
  -8  10  -6    4.91    0.52 
  -7  10  -6    2.18    0.35 
   2  10  -6    1.94    0.45 
   3  10  -6   -0.03    0.33 
   4  10  -6    0.36    0.27 
   5  10  -6    5.85    0.56 
 -11  11  -6    1.41    0.30 
 -10  11  -6    0.67    0.26 
  -9  11  -6    0.06    0.24 
  -8  11  -6   13.01    0.96 
  -7  11  -6   10.19    0.88 
   1  11  -6    5.13    0.79 
   2  11  -6    0.18    0.29 
   3  11  -6    0.93    0.26 
   4  11  -6    0.82    0.19 
 -10  12  -6    1.35    0.30 
  -9  12  -6    1.71    0.31 
  -8  12  -6    5.63    0.56 
  -7  12  -6   16.60    1.23 
   1  12  -6    0.41    0.23 
   2  12  -6    0.38    0.18 
  -7  13  -6    1.44    0.30 
  -6  13  -6    0.01    0.26 
  10 -14  -5    0.57    0.20 
  11 -14  -5    0.58    0.19 
  12 -14  -5    0.91    0.19 
   0 -13  -5    0.57    0.18 
   9 -13  -5    0.39    0.22 
  10 -13  -5    1.41    0.26 
  11 -13  -5    0.19    0.22 
  12 -13  -5    0.88    0.22 
  13 -13  -5    0.78    0.19 
  -2 -12  -5    0.93    0.21 
  -1 -12  -5    0.91    0.25 
   0 -12  -5    1.14    0.30 
   2 -12  -5    2.66    0.41 
   3 -12  -5    1.66    0.34 
   8 -12  -5   11.39    0.93 
   9 -12  -5    1.90    0.29 
  10 -12  -5    0.00    0.23 
  11 -12  -5    1.04    0.27 
  12 -12  -5    1.84    0.28 
  13 -12  -5    0.14    0.11 
  14 -12  -5    0.14    0.09 
  -4 -11  -5    0.23    0.17 
  -3 -11  -5    0.51    0.24 
  -2 -11  -5    0.04    0.26 
  -1 -11  -5    0.75    0.32 
   0 -11  -5   13.22    0.84 
   1 -11  -5    4.62    0.44 
   2 -11  -5    8.59    0.72 
   3 -11  -5    4.49    0.50 
   4 -11  -5    0.29    0.27 
   8 -11  -5    1.12    0.27 
   9 -11  -5   -0.16    0.24 
  10 -11  -5    1.73    0.31 
  11 -11  -5   13.79    0.57 
  12 -11  -5    0.26    0.11 
  13 -11  -5    0.34    0.10 
  14 -11  -5    0.74    0.12 
  15 -11  -5    1.02    0.11 
  -5 -10  -5    0.62    0.20 
  -4 -10  -5    1.02    0.28 
  -3 -10  -5    1.62    0.35 
  -2 -10  -5    0.09    0.20 
  -1 -10  -5    2.26    0.27 
   0 -10  -5    2.42    0.34 
   1 -10  -5    0.38    0.21 
   2 -10  -5   10.17    0.72 
   3 -10  -5    0.25    0.24 
   4 -10  -5    0.57    0.24 
   9 -10  -5    7.14    0.65 
  10 -10  -5    3.35    0.25 
  11 -10  -5    5.09    0.29 
  12 -10  -5    2.10    0.19 
  13 -10  -5   13.72    0.54 
  14 -10  -5    3.26    0.24 
  15 -10  -5    0.27    0.08 
  -6  -9  -5    0.16    0.20 
  -5  -9  -5    2.10    0.48 
  -4  -9  -5    0.22    0.30 
  -3  -9  -5    1.43    0.24 
  -2  -9  -5    0.01    0.20 
  -1  -9  -5    8.37    0.58 
   0  -9  -5    2.32    0.35 
   1  -9  -5    3.99    0.46 
   2  -9  -5   11.19    0.78 
   3  -9  -5    2.25    0.32 
   4  -9  -5    1.61    0.25 
   8  -9  -5    0.49    0.22 
   9  -9  -5    2.22    0.35 
  10  -9  -5    0.58    0.17 
  11  -9  -5    8.06    0.38 
  12  -9  -5    2.08    0.18 
  13  -9  -5    0.64    0.12 
  14  -9  -5    4.41    0.23 
  15  -9  -5    0.21    0.09 
  -7  -8  -5    1.73    0.34 
  -6  -8  -5    3.57    0.51 
  -5  -8  -5    7.29    0.53 
  -4  -8  -5   13.79    0.76 
  -3  -8  -5    1.10    0.23 
  -2  -8  -5    3.17    0.46 
  -1  -8  -5    0.09    0.27 
   0  -8  -5   51.73    2.64 
   1  -8  -5    5.03    0.42 
   2  -8  -5    0.51    0.19 
   3  -8  -5   28.21    1.40 
   4  -8  -5    1.60    0.25 
   6  -8  -5    6.30    0.50 
   7  -8  -5    3.62    0.37 
   8  -8  -5   54.22    3.37 
   9  -8  -5    4.66    0.45 
  10  -8  -5    9.57    0.74 
  11  -8  -5    4.18    0.27 
  12  -8  -5    0.87    0.13 
  13  -8  -5    1.08    0.12 
  14  -8  -5    3.08    0.17 
  15  -8  -5    0.05    0.08 
  -8  -7  -5   -0.03    0.18 
  -7  -7  -5    0.69    0.27 
  -6  -7  -5    4.18    0.36 
  -5  -7  -5    0.60    0.21 
  -4  -7  -5    1.21    0.24 
  -3  -7  -5    0.44    0.26 
  -2  -7  -5    2.23    0.34 
  -1  -7  -5    4.34    0.38 
   0  -7  -5   59.79    2.91 
   1  -7  -5   26.41    1.17 
   2  -7  -5    6.56    0.39 
   3  -7  -5   46.85    2.20 
   4  -7  -5   36.48    2.83 
   7  -7  -5   59.71    3.69 
   8  -7  -5    4.25    0.42 
   9  -7  -5   12.61    0.86 
  10  -7  -5    0.40    0.23 
  11  -7  -5    0.02    0.13 
  12  -7  -5   10.89    0.43 
  13  -7  -5    0.31    0.11 
  14  -7  -5    0.59    0.10 
  15  -7  -5    1.69    0.15 
  -7  -6  -5    0.32    0.18 
  -6  -6  -5    1.74    0.25 
  -5  -6  -5   13.84    0.80 
  -4  -6  -5   14.44    0.96 
  -3  -6  -5   11.21    0.80 
  -2  -6  -5    6.87    0.52 
  -1  -6  -5   33.36    1.52 
   0  -6  -5    6.21    0.38 
   1  -6  -5   12.01    0.61 
   2  -6  -5    5.84    0.57 
   3  -6  -5    7.45    0.62 
   4  -6  -5    7.53    0.65 
   7  -6  -5   28.85    1.76 
   8  -6  -5    0.34    0.19 
   9  -6  -5    1.90    0.29 
  10  -6  -5    0.73    0.24 
  11  -6  -5    3.41    0.25 
  12  -6  -5    2.03    0.15 
  13  -6  -5    3.97    0.24 
  14  -6  -5    2.89    0.23 
  15  -6  -5    0.13    0.08 
  -8  -5  -5    0.75    0.24 
  -7  -5  -5   12.50    0.70 
  -6  -5  -5    3.73    0.37 
  -5  -5  -5    2.01    0.30 
  -4  -5  -5    1.49    0.27 
  -3  -5  -5    9.35    0.67 
  -2  -5  -5    2.06    0.29 
  -1  -5  -5    5.15    0.37 
   0  -5  -5    0.25    0.32 
   1  -5  -5    0.71    0.31 
   2  -5  -5   36.87    2.00 
   3  -5  -5   70.44    3.57 
   4  -5  -5   13.69    1.39 
   8  -5  -5   31.14    1.97 
   9  -5  -5    1.28    0.24 
  10  -5  -5    1.28    0.27 
  11  -5  -5   12.91    0.55 
  12  -5  -5    1.24    0.14 
  13  -5  -5    8.31    0.35 
  14  -5  -5    2.52    0.20 
  15  -5  -5    0.71    0.13 
  -8  -4  -5    0.67    0.25 
  -7  -4  -5   -0.10    0.22 
  -6  -4  -5    0.39    0.22 
  -5  -4  -5    1.27    0.24 
  -4  -4  -5    1.11    0.23 
  -3  -4  -5   35.43    2.14 
  -2  -4  -5    7.00    0.52 
  -1  -4  -5   12.96    1.05 
   0  -4  -5   35.71    1.70 
   1  -4  -5    7.61    0.55 
   2  -4  -5   40.98    2.01 
   3  -4  -5    1.04    0.19 
   4  -4  -5   30.20    3.30 
   8  -4  -5    1.91    0.28 
   9  -4  -5    1.12    0.23 
  10  -4  -5   14.11    0.99 
  11  -4  -5    1.49    0.15 
  12  -4  -5   12.65    0.63 
  13  -4  -5    0.27    0.21 
  14  -4  -5    0.54    0.17 
  15  -4  -5    0.18    0.10 
  -9  -3  -5    2.48    0.37 
  -8  -3  -5    3.70    0.45 
  -7  -3  -5    0.49    0.23 
  -6  -3  -5    2.27    0.32 
  -5  -3  -5   29.00    1.75 
  -4  -3  -5   52.67    2.90 
  -3  -3  -5    8.30    0.56 
  -2  -3  -5   76.72    7.86 
  -1  -3  -5    0.50    0.33 
   0  -3  -5   61.39    2.76 
   1  -3  -5    4.77    0.41 
   2  -3  -5   43.93    3.06 
   3  -3  -5   55.45    3.65 
   8  -3  -5    9.71    0.69 
   9  -3  -5   11.84    0.82 
  10  -3  -5    0.28    0.21 
  11  -3  -5    0.73    0.26 
  12  -3  -5    2.09    0.30 
  13  -3  -5    1.57    0.25 
  14  -3  -5    0.62    0.15 
 -10  -2  -5    2.32    0.34 
  -9  -2  -5    8.61    0.66 
  -8  -2  -5    9.17    0.69 
  -7  -2  -5   11.43    0.79 
  -6  -2  -5    0.25    0.18 
  -5  -2  -5    5.35    0.46 
  -4  -2  -5    5.59    0.43 
  -3  -2  -5   40.95    4.34 
  -2  -2  -5   38.09    4.36 
  -1  -2  -5   49.24    4.91 
   0  -2  -5  187.63   19.34 
   1  -2  -5   12.45    1.35 
   2  -2  -5  195.86   19.29 
   8  -2  -5    5.96    0.49 
  10  -2  -5    3.69    0.49 
  11  -2  -5   -0.07    0.23 
  12  -2  -5    0.16    0.21 
  13  -2  -5    0.17    0.18 
  14  -2  -5    0.86    0.14 
 -10  -1  -5    5.54    0.50 
  -9  -1  -5    0.46    0.24 
  -8  -1  -5    6.07    0.46 
  -7  -1  -5    4.19    0.40 
  -6  -1  -5   25.26    1.80 
  -5  -1  -5   10.58    0.83 
  -3  -1  -5    4.28    0.96 
  -2  -1  -5    3.96    0.77 
  -1  -1  -5   13.16    1.43 
  10  -1  -5    8.51    0.72 
  11  -1  -5    0.96    0.27 
  12  -1  -5    1.20    0.23 
  13  -1  -5    0.36    0.16 
 -11   0  -5   15.25    1.03 
 -10   0  -5    3.91    0.43 
  -9   0  -5    2.67    0.36 
  -8   0  -5   51.25    2.96 
  -7   0  -5   62.20    3.80 
  -6   0  -5    4.76    0.44 
  -5   0  -5    0.69    0.17 
  -3   0  -5   51.11    5.89 
  -2   0  -5  179.23   19.34 
   3   0  -5   55.30    4.61 
  10   0  -5    3.67    0.47 
  11   0  -5   14.57    1.04 
  12   0  -5    2.26    0.30 
  13   0  -5    0.54    0.13 
 -11   1  -5    1.27    0.27 
 -10   1  -5    9.91    0.70 
  -9   1  -5    0.57    0.24 
  -8   1  -5    3.38    0.41 
  -7   1  -5   30.99    2.15 
  -6   1  -5    4.96    0.43 
  -3   1  -5   41.72    4.85 
   3   1  -5    5.91    0.37 
   4   1  -5    0.78    0.19 
   9   1  -5    0.76    0.26 
  10   1  -5    5.12    0.52 
  11   1  -5    0.40    0.19 
 -12   2  -5    0.04    0.21 
 -11   2  -5    0.12    0.23 
 -10   2  -5    4.00    0.45 
  -9   2  -5    2.35    0.37 
  -8   2  -5    5.69    0.53 
  -7   2  -5    1.76    0.28 
  -6   2  -5    8.01    0.56 
   2   2  -5   39.24    2.77 
   3   2  -5   40.82    2.09 
   4   2  -5    5.37    0.47 
 -12   3  -5    1.51    0.28 
 -11   3  -5    0.99    0.26 
 -10   3  -5    0.11    0.24 
  -9   3  -5   11.89    0.87 
  -8   3  -5    9.13    0.72 
  -7   3  -5   38.50    2.50 
  -6   3  -5    7.87    0.60 
   2   3  -5   76.99    5.05 
   3   3  -5    8.76    0.48 
   4   3  -5   50.18    3.38 
 -12   4  -5   12.56    0.93 
 -11   4  -5    1.44    0.30 
 -10   4  -5   13.97    1.05 
  -9   4  -5    1.02    0.26 
  -8   4  -5    1.72    0.29 
  -7   4  -5   49.85    3.40 
  -6   4  -5    5.75    0.46 
   2   4  -5    6.91    0.45 
   3   4  -5   34.40    1.92 
   4   4  -5    1.19    0.26 
   8   4  -5    0.55    0.34 
 -13   5  -5    8.94    0.68 
 -12   5  -5    1.54    0.29 
 -11   5  -5   13.92    1.02 
 -10   5  -5    2.03    0.31 
  -9   5  -5    1.27    0.26 
  -8   5  -5   29.00    2.02 
  -7   5  -5    6.54    0.51 
  -6   5  -5   11.48    0.84 
  -5   5  -5    0.79    0.18 
   2   5  -5    1.95    0.23 
   3   5  -5    9.35    0.57 
   4   5  -5    1.29    0.28 
   7   5  -5   11.60    1.23 
   8   5  -5    0.79    0.33 
 -13   6  -5    4.13    0.45 
 -12   6  -5    1.69    0.33 
 -11   6  -5    3.73    0.46 
 -10   6  -5    0.39    0.24 
  -9   6  -5    2.46    0.36 
  -8   6  -5    0.36    0.20 
  -7   6  -5   28.25    1.81 
  -6   6  -5    4.74    0.47 
   1   6  -5   31.73    1.68 
   2   6  -5    6.38    0.44 
   3   6  -5   10.60    0.89 
   7   6  -5    0.16    0.33 
   8   6  -5    3.08    0.48 
 -13   7  -5    0.16    0.23 
 -12   7  -5   11.90    0.88 
 -11   7  -5    0.14    0.24 
 -10   7  -5    0.21    0.24 
  -9   7  -5   11.90    0.89 
  -8   7  -5    4.41    0.46 
  -7   7  -5   62.70    3.81 
  -6   7  -5   33.80    2.17 
   1   7  -5    4.24    0.35 
   2   7  -5    1.78    0.35 
   3   7  -5    0.38    0.25 
   6   7  -5    4.30    0.72 
   7   7  -5    0.58    0.29 
   8   7  -5    0.09    0.17 
 -12   8  -5    0.78    0.27 
 -11   8  -5    3.77    0.48 
 -10   8  -5   10.08    0.78 
  -9   8  -5    5.77    0.51 
  -8   8  -5   55.95    3.49 
  -7   8  -5    3.45    0.42 
   0   8  -5   52.13    3.49 
   1   8  -5    0.32    0.27 
   2   8  -5    3.63    0.49 
   5   8  -5    6.75    0.97 
   6   8  -5    3.22    0.54 
   7   8  -5    1.79    0.34 
 -12   9  -5    2.08    0.37 
 -11   9  -5    8.08    0.68 
 -10   9  -5    0.26    0.26 
  -9   9  -5    2.47    0.42 
  -8   9  -5    0.38    0.27 
  -7   9  -5    2.48    0.41 
  -1   9  -5    3.90    0.55 
   0   9  -5    1.50    0.36 
   4   9  -5   -0.30    0.35 
   5   9  -5    1.70    0.38 
   6   9  -5    0.22    0.19 
 -12  10  -5    1.57    0.30 
 -11  10  -5    5.65    0.54 
 -10  10  -5    3.88    0.45 
  -9  10  -5    8.24    0.71 
  -8  10  -5    3.76    0.48 
  -7  10  -5    0.05    0.27 
   3  10  -5    1.29    0.41 
   4  10  -5    0.80    0.30 
   5  10  -5    0.74    0.21 
 -11  11  -5   14.70    1.05 
 -10  11  -5    1.35    0.31 
  -9  11  -5    0.30    0.26 
  -8  11  -5    0.93    0.31 
  -7  11  -5    1.50    0.35 
   1  11  -5    0.80    0.38 
   2  11  -5    0.13    0.30 
   3  11  -5    0.37    0.25 
   4  11  -5    0.18    0.17 
 -10  12  -5    0.05    0.24 
  -9  12  -5    1.65    0.31 
  -8  12  -5   11.64    0.96 
  -7  12  -5    1.09    0.32 
   1  12  -5    0.49    0.27 
   2  12  -5    0.94    0.22 
  -8  13  -5    7.77    0.68 
  -7  13  -5    3.44    0.47 
  -6  13  -5    0.16    0.26 
  11 -15  -4    2.76    0.29 
  10 -14  -4    8.67    0.70 
  11 -14  -4    0.26    0.18 
  12 -14  -4    0.40    0.17 
  13 -14  -4    3.51    0.32 
  -1 -13  -4    3.44    0.37 
   9 -13  -4    5.87    0.53 
  10 -13  -4    0.10    0.21 
  11 -13  -4    1.24    0.25 
  12 -13  -4    2.92    0.36 
  13 -13  -4    0.17    0.18 
  14 -13  -4    2.86    0.30 
  -2 -12  -4    0.63    0.20 
  -1 -12  -4    1.96    0.43 
   0 -12  -4   14.46    1.51 
   2 -12  -4    2.60    0.39 
   3 -12  -4   -0.03    0.26 
   4 -12  -4    0.43    0.27 
   8 -12  -4    0.33    0.24 
   9 -12  -4    0.45    0.24 
  10 -12  -4    8.90    0.76 
  11 -12  -4   26.69    1.83 
  12 -12  -4   18.10    1.18 
  13 -12  -4    0.93    0.23 
  14 -12  -4    1.25    0.14 
  -4 -11  -4    2.48    0.35 
  -3 -11  -4   -0.04    0.23 
  -2 -11  -4    1.15    0.31 
  -1 -11  -4   29.99    2.41 
   0 -11  -4    6.32    0.44 
   1 -11  -4    6.64    0.72 
   2 -11  -4    1.02    0.32 
   3 -11  -4    0.67    0.29 
   4 -11  -4    5.06    0.55 
   5 -11  -4    1.72    0.31 
   8 -11  -4   11.82    0.93 
   9 -11  -4    5.69    0.60 
  10 -11  -4   16.26    1.02 
  11 -11  -4    4.44    0.35 
  12 -11  -4   12.26    0.49 
  13 -11  -4    0.14    0.10 
  14 -11  -4    3.04    0.21 
  15 -11  -4   10.52    0.48 
  -5 -10  -4    0.31    0.21 
  -4 -10  -4   10.63    0.94 
  -3 -10  -4    0.02    0.29 
  -2 -10  -4   11.14    0.63 
  -1 -10  -4   11.90    0.83 
   0 -10  -4   26.04    1.42 
   1 -10  -4    0.05    0.21 
   2 -10  -4    9.54    0.74 
   3 -10  -4    0.46    0.25 
   4 -10  -4    8.71    0.64 
   5 -10  -4    0.49    0.24 
   9 -10  -4    0.67    0.23 
  10 -10  -4   25.31    0.97 
  11 -10  -4    7.95    0.38 
  12 -10  -4    2.65    0.21 
  13 -10  -4    1.46    0.14 
  14 -10  -4    0.30    0.12 
  15 -10  -4    1.72    0.15 
  -6  -9  -4   15.95    1.41 
  -4  -9  -4    5.12    0.73 
  -3  -9  -4    0.84    0.21 
  -2  -9  -4    6.27    0.48 
  -1  -9  -4    0.94    0.24 
   0  -9  -4    0.75    0.29 
   1  -9  -4   35.54    1.81 
   2  -9  -4    1.59    0.28 
   3  -9  -4    5.46    0.46 
   4  -9  -4   16.43    0.97 
   5  -9  -4    7.04    0.54 
   8  -9  -4   10.88    0.81 
   9  -9  -4    0.15    0.23 
  10  -9  -4    0.13    0.16 
  11  -9  -4    0.77    0.15 
  12  -9  -4    0.02    0.13 
  13  -9  -4    9.29    0.41 
  14  -9  -4    0.69    0.10 
  15  -9  -4    3.35    0.21 
  -7  -8  -4    4.35    0.47 
  -6  -8  -4    6.54    0.80 
  -5  -8  -4   13.50    0.71 
  -4  -8  -4    0.02    0.21 
  -3  -8  -4   11.89    0.78 
  -2  -8  -4    3.29    0.47 
  -1  -8  -4   11.70    0.78 
   0  -8  -4    5.85    0.57 
   1  -8  -4  112.69    4.79 
   2  -8  -4   17.40    0.91 
   3  -8  -4    1.69    0.25 
   4  -8  -4   38.91    1.84 
   5  -8  -4   26.47    1.38 
   7  -8  -4   35.49    2.31 
   8  -8  -4    8.44    0.60 
   9  -8  -4   33.29    2.21 
  10  -8  -4   10.02    0.77 
  11  -8  -4    0.55    0.14 
  12  -8  -4    0.37    0.14 
  13  -8  -4    4.99    0.24 
  14  -8  -4    3.33    0.18 
  15  -8  -4    2.72    0.19 
  -8  -7  -4    2.77    0.40 
  -7  -7  -4    0.41    0.27 
  -6  -7  -4    1.51    0.23 
  -5  -7  -4    1.44    0.24 
  -4  -7  -4    0.73    0.21 
  -3  -7  -4    9.54    0.78 
  -2  -7  -4   40.94    2.35 
  -1  -7  -4   33.44    1.68 
   0  -7  -4   39.54    1.57 
   1  -7  -4    0.47    0.17 
   2  -7  -4   43.45    1.98 
   3  -7  -4    5.42    0.80 
   4  -7  -4   70.16    3.27 
   5  -7  -4   70.15    3.44 
   7  -7  -4   37.94    2.40 
   8  -7  -4  119.76    7.34 
   9  -7  -4    1.39    0.27 
  10  -7  -4    0.35    0.24 
  11  -7  -4    5.44    0.30 
  12  -7  -4   22.36    0.76 
  13  -7  -4    1.45    0.13 
  14  -7  -4    0.17    0.09 
  15  -7  -4    3.43    0.22 
  -8  -6  -4    5.00    0.52 
  -7  -6  -4    1.85    0.23 
  -6  -6  -4    0.87    0.22 
  -5  -6  -4    0.09    0.20 
  -4  -6  -4    6.31    0.55 
  -3  -6  -4   28.69    1.63 
  -2  -6  -4    8.86    0.60 
  -1  -6  -4    2.66    0.29 
   0  -6  -4   19.64    0.92 
   1  -6  -4   34.49    1.92 
   2  -6  -4   15.45    1.01 
   3  -6  -4    3.72    0.39 
   4  -6  -4   36.61    2.32 
   8  -6  -4   17.33    1.15 
   9  -6  -4    5.36    0.47 
  10  -6  -4    9.75    0.69 
  11  -6  -4    2.17    0.18 
  12  -6  -4    1.68    0.14 
  13  -6  -4    2.36    0.18 
  14  -6  -4    7.86    0.33 
  15  -6  -4   15.43    0.73 
  -8  -5  -4    4.87    0.48 
  -7  -5  -4   24.25    1.26 
  -6  -5  -4    1.64    0.25 
  -5  -5  -4    0.36    0.23 
  -4  -5  -4    5.30    0.51 
  -3  -5  -4   24.29    1.53 
  -2  -5  -4   79.64    3.63 
  -1  -5  -4    0.33    0.15 
   0  -5  -4   31.41    1.63 
   1  -5  -4    1.91    0.38 
   2  -5  -4    0.97    0.26 
   3  -5  -4  100.09    4.64 
   4  -5  -4    1.91    0.25 
   8  -5  -4    1.64    0.27 
   9  -5  -4   16.76    1.14 
  10  -5  -4    0.23    0.21 
  11  -5  -4    0.07    0.12 
  12  -5  -4    1.40    0.15 
  13  -5  -4   10.71    0.48 
  14  -5  -4    2.00    0.19 
  -8  -4  -4    0.28    0.24 
  -7  -4  -4    5.78    0.53 
  -6  -4  -4    8.28    0.64 
  -5  -4  -4   15.99    1.04 
  -4  -4  -4   42.88    2.40 
  -3  -4  -4   82.84    4.41 
  -2  -4  -4   47.13    2.28 
  -1  -4  -4    0.53    0.34 
   0  -4  -4  150.66    6.84 
   1  -4  -4  129.38    6.28 
   2  -4  -4   37.97    1.91 
   3  -4  -4   36.38    1.96 
   4  -4  -4  139.91    7.55 
   8  -4  -4   42.83    2.72 
   9  -4  -4    7.88    0.53 
  10  -4  -4    6.17    0.52 
  11  -4  -4    0.56    0.13 
  12  -4  -4    0.40    0.12 
  13  -4  -4    6.09    0.35 
  14  -4  -4    9.60    0.70 
  15  -4  -4    2.54    0.25 
  -9  -3  -4    0.09    0.24 
  -8  -3  -4    0.58    0.25 
  -7  -3  -4    0.51    0.23 
  -6  -3  -4    5.04    0.44 
  -5  -3  -4    1.13    0.22 
  -4  -3  -4    9.12    0.58 
  -3  -3  -4    2.56    0.29 
  -2  -3  -4   87.61   10.17 
  -1  -3  -4   49.64    2.09 
   0  -3  -4    4.52    0.44 
   1  -3  -4    7.61    0.55 
   2  -3  -4   68.69    4.62 
   3  -3  -4    3.48    0.38 
   8  -3  -4   28.01    1.71 
   9  -3  -4   26.69    1.78 
  10  -3  -4   12.00    0.79 
  11  -3  -4   13.59    0.98 
  12  -3  -4    0.25    0.24 
  13  -3  -4    0.11    0.19 
  14  -3  -4    0.18    0.15 
 -10  -2  -4    2.84    0.36 
  -9  -2  -4    1.15    0.27 
  -8  -2  -4   10.66    0.74 
  -7  -2  -4    2.22    0.31 
  -6  -2  -4   15.36    1.17 
  -5  -2  -4   43.79    2.99 
  -4  -2  -4   16.64    1.13 
  -2  -2  -4   39.27    4.18 
  -1  -2  -4   79.78    4.14 
   0  -2  -4  177.06   10.12 
   1  -2  -4   22.43    1.84 
   2  -2  -4  156.00   10.03 
   8  -2  -4   11.51    0.70 
  10  -2  -4    2.54    0.46 
  11  -2  -4    5.90    0.60 
  12  -2  -4    9.33    0.76 
  13  -2  -4    1.20    0.22 
  14  -2  -4    0.46    0.13 
 -10  -1  -4    8.87    0.67 
  -9  -1  -4    0.21    0.24 
  -8  -1  -4   32.23    1.96 
  -7  -1  -4  114.69    7.55 
  -6  -1  -4    1.32    0.21 
  -5  -1  -4   35.52    2.47 
  -2  -1  -4    7.46    1.07 
  -1  -1  -4   18.58    2.15 
  10  -1  -4    0.58    0.26 
  11  -1  -4   15.86    1.05 
  12  -1  -4   26.77    1.87 
  13  -1  -4    3.25    0.32 
  14  -1  -4    3.36    0.28 
 -11   0  -4    4.34    0.47 
 -10   0  -4   27.04    1.77 
  -9   0  -4    0.40    0.23 
  -7   0  -4   31.99    2.46 
  -6   0  -4   19.55    1.37 
   2   0  -4  157.54   12.81 
   3   0  -4    3.28    0.36 
   4   0  -4  147.82    9.71 
  10   0  -4   25.51    1.77 
  12   0  -4   17.09    1.18 
  13   0  -4    0.29    0.13 
 -11   1  -4   15.44    1.03 
 -10   1  -4    0.91    0.26 
  -9   1  -4   11.12    0.84 
  -8   1  -4   38.55    2.39 
  -7   1  -4    1.88    0.31 
  -6   1  -4    0.04    0.15 
   3   1  -4  132.59    6.92 
   4   1  -4    2.82    0.29 
   5   1  -4   37.00    2.47 
   9   1  -4    0.05    0.24 
  10   1  -4    9.07    0.68 
  11   1  -4   12.15    0.89 
  12   1  -4    0.88    0.18 
 -12   2  -4    8.85    0.73 
 -11   2  -4    6.59    0.57 
 -10   2  -4    2.82    0.41 
  -9   2  -4   39.53    2.72 
  -8   2  -4   10.43    0.72 
  -7   2  -4   68.79    4.74 
  -6   2  -4   39.95    2.81 
   2   2  -4   41.30    2.65 
   3   2  -4    1.28    0.15 
   4   2  -4   15.75    1.13 
   5   2  -4   43.24    2.98 
 -12   3  -4    0.35    0.23 
 -11   3  -4   13.97    0.96 
 -10   3  -4   11.05    0.84 
  -9   3  -4   25.10    1.84 
  -8   3  -4   26.01    1.76 
  -7   3  -4   75.94    5.22 
  -6   3  -4    3.49    0.32 
   2   3  -4   96.57    5.10 
   3   3  -4    2.70    0.25 
   4   3  -4    8.90    0.66 
   5   3  -4    1.25    0.26 
 -12   4  -4    0.12    0.23 
 -11   4  -4    0.84    0.27 
 -10   4  -4    6.08    0.57 
  -9   4  -4    6.94    0.55 
  -8   4  -4   41.97    2.80 
  -7   4  -4    8.43    0.63 
  -6   4  -4   15.49    1.13 
   2   4  -4   43.45    2.17 
   3   4  -4   77.91    4.00 
   4   4  -4   40.75    2.80 
   5   4  -4   15.28    1.19 
 -13   5  -4   11.07    0.87 
 -12   5  -4    1.77    0.30 
 -11   5  -4    0.10    0.24 
 -10   5  -4    0.20    0.23 
  -9   5  -4   16.64    1.17 
  -8   5  -4    1.42    0.23 
  -7   5  -4   44.16    2.99 
  -6   5  -4   38.55    2.48 
   2   5  -4   70.51    3.65 
   3   5  -4   22.88    1.37 
   4   5  -4    5.13    0.57 
   8   5  -4    4.41    0.70 
 -13   6  -4    2.21    0.36 
 -12   6  -4    1.67    0.30 
 -11   6  -4    1.82    0.32 
 -10   6  -4    8.90    0.71 
  -9   6  -4    5.23    0.49 
  -8   6  -4   16.44    1.18 
  -7   6  -4    0.86    0.20 
  -6   6  -4   21.06    1.39 
   1   6  -4    3.01    0.27 
   2   6  -4    8.42    0.58 
   3   6  -4   25.98    1.86 
   4   6  -4    5.74    0.59 
   7   6  -4    2.01    0.43 
   8   6  -4    3.72    0.55 
 -13   7  -4    1.20    0.28 
 -12   7  -4   22.39    1.59 
 -11   7  -4    5.14    0.52 
 -10   7  -4    0.58    0.24 
  -9   7  -4    1.35    0.27 
  -8   7  -4  117.37    7.56 
  -7   7  -4   34.86    2.47 
  -6   7  -4    2.03    0.34 
   0   7  -4   38.47    3.04 
   1   7  -4   33.32    1.86 
   2   7  -4   37.53    2.73 
   3   7  -4    9.81    0.86 
   7   7  -4    0.14    0.28 
   8   7  -4    2.54    0.38 
 -13   8  -4    5.48    0.49 
 -12   8  -4    0.57    0.25 
 -11   8  -4    0.87    0.27 
 -10   8  -4   11.13    0.82 
  -9   8  -4   33.65    2.28 
  -7   8  -4   39.61    2.41 
   0   8  -4    5.95    0.67 
   1   8  -4   10.92    0.91 
   2   8  -4    3.75    0.48 
   6   8  -4    7.11    0.85 
   7   8  -4    4.26    0.48 
 -12   9  -4   -0.17    0.22 
 -11   9  -4    1.08    0.28 
 -10   9  -4    0.07    0.24 
  -9   9  -4    0.46    0.26 
  -8   9  -4   11.90    0.87 
  -7   9  -4   41.47    2.73 
  -1   9  -4   35.69    2.32 
   0   9  -4    0.57    0.29 
   5   9  -4    2.62    0.55 
   6   9  -4   16.82    1.42 
 -12  10  -4    2.45    0.38 
 -11  10  -4    8.67    0.68 
 -10  10  -4   26.02    1.78 
  -9  10  -4    0.90    0.28 
  -8  10  -4    3.16    0.45 
  -7  10  -4   11.26    0.87 
   4  10  -4    9.94    0.98 
   5  10  -4    0.28    0.21 
 -11  11  -4    4.04    0.48 
 -10  11  -4   15.09    1.05 
  -9  11  -4    6.18    0.59 
  -8  11  -4   13.74    0.99 
  -7  11  -4    0.12    0.29 
   2  11  -4    1.19    0.36 
   3  11  -4    0.23    0.26 
   4  11  -4    2.80    0.38 
 -10  12  -4    8.38    0.75 
  -9  12  -4    0.31    0.26 
  -8  12  -4    0.43    0.26 
  -7  12  -4    1.28    0.34 
   1  12  -4    1.63    0.37 
   2  12  -4    0.66    0.22 
  -8  13  -4   10.80    0.89 
  -7  13  -4    2.22    0.39 
  11 -15  -3    0.16    0.15 
   9 -14  -3    9.00    0.69 
  10 -14  -3    0.19    0.20 
  11 -14  -3    0.94    0.21 
  12 -14  -3    5.31    0.43 
  13 -14  -3    1.69    0.25 
   9 -13  -3    5.66    0.52 
  10 -13  -3    0.53    0.23 
  11 -13  -3    3.05    0.40 
  12 -13  -3   12.59    0.91 
  13 -13  -3    0.93    0.20 
  14 -13  -3    0.45    0.15 
  -2 -12  -3    4.43    0.53 
  -1 -12  -3   13.03    1.17 
   0 -12  -3   11.99    0.98 
   2 -12  -3    7.51    0.69 
   3 -12  -3    4.00    0.53 
   4 -12  -3    3.87    0.50 
   5 -12  -3    1.18    0.31 
   6 -12  -3   12.34    0.92 
   8 -12  -3    0.33    0.24 
   9 -12  -3    1.83    0.30 
  10 -12  -3   20.29    1.36 
  11 -12  -3    4.28    0.46 
  12 -12  -3    9.58    0.77 
  13 -12  -3    3.68    0.39 
  14 -12  -3    2.02    0.18 
  -4 -11  -3    0.08    0.18 
  -3 -11  -3    1.19    0.27 
  -2 -11  -3    4.68    0.57 
   0 -11  -3   36.14    2.04 
   1 -11  -3    2.61    0.40 
   2 -11  -3    7.43    0.72 
   3 -11  -3    3.91    0.50 
   4 -11  -3    0.12    0.26 
   5 -11  -3    4.11    0.47 
   6 -11  -3    6.57    0.62 
   9 -11  -3    1.45    0.28 
  10 -11  -3   23.72    1.67 
  11 -11  -3   39.10    1.76 
  12 -11  -3    2.64    0.22 
  13 -11  -3    0.46    0.11 
  14 -11  -3    3.66    0.24 
  15 -11  -3    0.21    0.08 
  -5 -10  -3   10.53    0.96 
  -4 -10  -3   -0.06    0.24 
  -3 -10  -3    0.67    0.32 
  -2 -10  -3   19.90    1.12 
  -1 -10  -3   27.21    1.37 
   0 -10  -3    0.66    0.24 
   1 -10  -3    1.53    0.34 
   2 -10  -3    3.41    0.44 
   3 -10  -3    2.59    0.38 
   4 -10  -3   14.52    0.95 
   5 -10  -3    3.43    0.39 
   6 -10  -3    7.50    0.70 
  10 -10  -3    1.36    0.20 
  11 -10  -3    2.17    0.19 
  12 -10  -3    7.69    0.36 
  13 -10  -3    6.59    0.31 
  14 -10  -3    3.16    0.24 
  15 -10  -3    4.05    0.23 
  -6  -9  -3    3.81    0.43 
  -5  -9  -3    8.84    0.93 
  -4  -9  -3    6.53    0.43 
  -3  -9  -3    2.40    0.29 
  -2  -9  -3    0.80    0.23 
  -1  -9  -3   10.29    0.67 
   0  -9  -3    0.96    0.30 
   1  -9  -3    5.25    0.52 
   2  -9  -3    4.06    0.44 
   3  -9  -3   17.30    1.01 
   4  -9  -3   10.98    0.74 
   5  -9  -3   68.59    3.50 
   6  -9  -3   33.06    2.26 
   8  -9  -3    1.97    0.29 
   9  -9  -3    1.03    0.25 
  10  -9  -3    1.24    0.19 
  11  -9  -3    7.62    0.38 
  12  -9  -3    4.65    0.28 
  13  -9  -3    0.30    0.12 
  14  -9  -3    3.36    0.20 
  -7  -8  -3    0.11    0.21 
  -6  -8  -3    6.77    0.66 
  -5  -8  -3    0.58    0.20 
  -4  -8  -3    0.51    0.22 
  -3  -8  -3    7.08    0.52 
  -2  -8  -3    0.13    0.28 
  -1  -8  -3    2.76    0.37 
   0  -8  -3   60.75    3.09 
   1  -8  -3    8.28    0.52 
   2  -8  -3   16.38    0.90 
   3  -8  -3    3.18    0.31 
   4  -8  -3    5.87    0.39 
   5  -8  -3   17.13    1.06 
   6  -8  -3   40.32    2.84 
   7  -8  -3   40.83    2.90 
   8  -8  -3   62.54    4.01 
   9  -8  -3    4.95    0.52 
  10  -8  -3    2.81    0.41 
  11  -8  -3    3.37    0.26 
  12  -8  -3    4.49    0.28 
  13  -8  -3    8.69    0.35 
  14  -8  -3    1.22    0.11 
  15  -8  -3    1.06    0.13 
  -8  -7  -3    1.76    0.32 
  -7  -7  -3    2.64    0.47 
  -6  -7  -3    4.40    0.36 
  -5  -7  -3    0.39    0.21 
  -4  -7  -3    7.48    0.53 
  -3  -7  -3   17.13    1.12 
  -2  -7  -3    0.56    0.25 
  -1  -7  -3   47.70    1.89 
   0  -7  -3    3.81    0.35 
   1  -7  -3   45.63    2.01 
   2  -7  -3    7.11    0.50 
   3  -7  -3   74.05    3.25 
   4  -7  -3   64.03    2.73 
   5  -7  -3   17.41    0.93 
   6  -7  -3   10.79    0.79 
   7  -7  -3    4.65    0.41 
   8  -7  -3    6.91    0.55 
   9  -7  -3    4.23    0.43 
  10  -7  -3    2.55    0.37 
  11  -7  -3    0.36    0.14 
  12  -7  -3    1.67    0.15 
  13  -7  -3    3.50    0.23 
  14  -7  -3    2.14    0.18 
  15  -7  -3    0.07    0.08 
  -8  -6  -3    0.70    0.28 
  -7  -6  -3    3.33    0.34 
  -6  -6  -3   12.31    0.72 
  -5  -6  -3    6.88    0.51 
  -4  -6  -3    9.85    0.67 
  -3  -6  -3   30.99    1.96 
  -2  -6  -3   47.63    1.99 
  -1  -6  -3    9.73    0.60 
   0  -6  -3    0.64    0.17 
   1  -6  -3    3.32    0.26 
   2  -6  -3    2.60    0.39 
   3  -6  -3   62.62    3.81 
   4  -6  -3   73.65    4.17 
   5  -6  -3    1.54    0.49 
   6  -6  -3    0.46    0.17 
   8  -6  -3   17.20    1.14 
   9  -6  -3   17.24    1.16 
  10  -6  -3   16.29    1.08 
  11  -6  -3    3.84    0.27 
  12  -6  -3   11.82    0.50 
  13  -6  -3    3.63    0.24 
  14  -6  -3    4.96    0.25 
  15  -6  -3    2.55    0.18 
  -8  -5  -3   10.95    0.74 
  -7  -5  -3    2.72    0.32 
  -6  -5  -3    4.86    0.40 
  -5  -5  -3    3.46    0.40 
  -4  -5  -3   70.99    4.05 
  -3  -5  -3   21.64    1.21 
  -2  -5  -3   16.46    0.90 
  -1  -5  -3    1.29    0.22 
   0  -5  -3  112.50    5.37 
   1  -5  -3   35.11    1.81 
   2  -5  -3   43.57    2.20 
   3  -5  -3   16.53    1.07 
   4  -5  -3  184.02    9.07 
   5  -5  -3  123.04    7.63 
   8  -5  -3    3.00    0.31 
   9  -5  -3   11.93    0.92 
  10  -5  -3    4.14    0.40 
  11  -5  -3    7.19    0.35 
  12  -5  -3    0.72    0.13 
  13  -5  -3    0.35    0.11 
  14  -5  -3    9.64    0.47 
  15  -5  -3   10.12    0.73 
  -8  -4  -3    4.75    0.48 
  -7  -4  -3    0.47    0.25 
  -6  -4  -3   15.10    1.00 
  -5  -4  -3   15.74    0.88 
  -4  -4  -3    4.11    0.41 
  -3  -4  -3   61.67    3.64 
  -2  -4  -3   83.90    3.46 
  -1  -4  -3  216.83    9.20 
   0  -4  -3   30.65    1.52 
   1  -4  -3   48.37    2.46 
   2  -4  -3   94.67    4.60 
   3  -4  -3  104.82    4.83 
   4  -4  -3   25.07    1.55 
   5  -4  -3   35.40    2.41 
   8  -4  -3    6.78    0.45 
   9  -4  -3   74.38    4.64 
  10  -4  -3    8.20    0.66 
  11  -4  -3    7.95    0.37 
  12  -4  -3    0.49    0.13 
  13  -4  -3    5.27    0.34 
  14  -4  -3    0.18    0.17 
  15  -4  -3    0.31    0.11 
  -9  -3  -3    5.77    0.50 
  -8  -3  -3    3.57    0.44 
  -7  -3  -3    2.44    0.35 
  -6  -3  -3   15.21    1.05 
  -5  -3  -3    2.82    0.32 
  -4  -3  -3   78.62    5.15 
  -3  -3  -3   69.07    4.75 
  -2  -3  -3   26.21    1.46 
  -1  -3  -3  107.87    4.92 
   0  -3  -3   16.54    0.93 
   1  -3  -3    5.71    0.46 
   2  -3  -3    6.50    0.69 
   3  -3  -3   16.48    1.10 
   4  -3  -3   49.74    2.65 
   5  -3  -3   44.51    3.02 
   8  -3  -3   18.00    1.31 
   9  -3  -3   37.45    2.20 
  10  -3  -3   17.87    1.19 
  11  -3  -3    7.10    0.43 
  12  -3  -3    2.12    0.31 
  13  -3  -3    0.61    0.22 
  14  -3  -3    0.83    0.18 
 -10  -2  -3    8.23    0.64 
  -9  -2  -3    9.43    0.67 
  -8  -2  -3    3.44    0.39 
  -7  -2  -3    3.98    0.43 
  -6  -2  -3   16.00    1.16 
  -5  -2  -3    7.77    0.57 
  -4  -2  -3    2.43    0.27 
  -1  -2  -3   10.51    0.63 
   0  -2  -3  119.85    8.91 
   1  -2  -3   18.82    1.87 
   2  -2  -3   91.71    8.75 
   3  -2  -3    5.47    0.56 
   4  -2  -3  100.12    7.98 
   5  -2  -3   21.60    1.42 
   8  -2  -3   42.60    2.76 
  11  -2  -3    1.35    0.29 
  12  -2  -3   20.87    1.40 
  13  -2  -3    2.82    0.39 
  14  -2  -3    5.19    0.41 
 -10  -1  -3    2.33    0.38 
  -9  -1  -3    1.30    0.28 
  -8  -1  -3    6.20    0.51 
  -7  -1  -3    6.03    0.55 
  -6  -1  -3   44.26    3.01 
  -5  -1  -3    2.44    0.29 
   3  -1  -3    8.83    0.71 
   4  -1  -3  104.85    5.35 
   5  -1  -3  197.54   13.10 
  10  -1  -3   10.03    0.84 
  11  -1  -3   22.75    1.70 
  12  -1  -3    4.53    0.45 
  13  -1  -3   12.55    0.90 
  14  -1  -3    1.74    0.20 
 -11   0  -3   39.23    2.56 
 -10   0  -3    1.56    0.27 
  -9   0  -3    1.40    0.27 
  -8   0  -3   63.48    4.13 
  -7   0  -3    5.84    0.43 
  -6   0  -3    0.40    0.16 
   2   0  -3  105.05    8.69 
   3   0  -3   12.90    1.32 
   4   0  -3   26.50    1.49 
   5   0  -3  115.75    7.54 
  10   0  -3    1.75    0.30 
  11   0  -3   40.02    2.56 
  12   0  -3    9.17    0.75 
  13   0  -3    0.93    0.16 
 -11   1  -3   23.42    1.70 
 -10   1  -3   10.87    0.81 
  -9   1  -3    2.26    0.36 
  -8   1  -3   44.33    3.00 
  -7   1  -3   11.32    0.80 
  -6   1  -3    1.46    0.23 
   2   1  -3    5.62    0.50 
   3   1  -3   51.20    2.63 
   4   1  -3   34.51    1.82 
   5   1  -3    2.68    0.33 
   9   1  -3    1.02    0.28 
  10   1  -3    1.86    0.31 
  11   1  -3    3.48    0.39 
  12   1  -3    3.11    0.33 
 -12   2  -3   20.45    1.39 
 -11   2  -3    1.53    0.28 
 -10   2  -3    0.31    0.23 
  -9   2  -3    1.18    0.26 
  -8   2  -3   40.75    2.85 
  -7   2  -3   18.25    1.19 
  -6   2  -3   77.45    5.25 
   2   2  -3  102.77    5.08 
   3   2  -3   43.93    2.32 
   4   2  -3    2.01    0.21 
   5   2  -3    7.55    0.61 
 -12   3  -3    1.91    0.34 
 -11   3  -3    6.95    0.62 
 -10   3  -3   16.94    1.23 
  -9   3  -3   34.30    2.27 
  -8   3  -3   18.29    1.35 
  -7   3  -3   64.82    4.31 
  -6   3  -3   71.94    4.75 
   2   3  -3   22.40    1.09 
   3   3  -3   72.73    3.64 
   4   3  -3   76.39    3.94 
   5   3  -3    2.44    0.37 
 -12   4  -3    0.23    0.23 
 -11   4  -3    8.19    0.67 
 -10   4  -3    8.18    0.70 
  -9   4  -3   71.65    4.77 
  -8   4  -3    6.09    0.46 
  -7   4  -3   75.37    5.14 
  -6   4  -3    2.29    0.26 
   2   4  -3   78.53    4.02 
   3   4  -3   61.97    3.31 
   4   4  -3    3.60    0.35 
   5   4  -3   13.58    0.99 
 -13   5  -3    0.11    0.21 
 -12   5  -3    0.62    0.25 
 -11   5  -3    7.66    0.63 
 -10   5  -3    3.68    0.43 
  -9   5  -3   13.33    0.95 
  -8   5  -3    2.86    0.34 
  -7   5  -3    7.91    0.58 
  -6   5  -3    2.65    0.30 
   1   5  -3    0.98    0.26 
   2   5  -3   15.54    0.93 
   3   5  -3   20.84    1.07 
   4   5  -3   66.66    4.75 
   5   5  -3    2.70    0.44 
   8   5  -3    9.07    1.00 
 -13   6  -3    3.71    0.43 
 -12   6  -3   11.18    0.90 
 -11   6  -3    4.44    0.49 
 -10   6  -3   15.21    1.11 
  -9   6  -3   16.52    1.19 
  -8   6  -3   16.30    1.17 
  -7   6  -3   45.11    3.02 
  -6   6  -3    0.39    0.18 
   1   6  -3   10.17    0.64 
   2   6  -3   42.62    2.21 
   3   6  -3   31.57    2.28 
   4   6  -3    8.70    0.74 
   8   6  -3    0.85    0.30 
 -13   7  -3    3.64    0.42 
 -12   7  -3    1.77    0.32 
 -11   7  -3    0.33    0.24 
 -10   7  -3    2.33    0.38 
  -9   7  -3    4.11    0.45 
  -8   7  -3    5.68    0.56 
  -7   7  -3    6.07    0.46 
  -6   7  -3   12.31    0.82 
   0   7  -3    3.65    0.55 
   1   7  -3   46.21    2.34 
   2   7  -3    0.28    0.26 
   3   7  -3   15.96    1.26 
   7   7  -3    2.51    0.42 
   8   7  -3    1.19    0.24 
 -13   8  -3    8.71    0.72 
 -12   8  -3    4.39    0.48 
 -11   8  -3    3.51    0.45 
 -10   8  -3    3.13    0.43 
  -9   8  -3    5.67    0.53 
  -8   8  -3   63.61    4.14 
  -7   8  -3   43.52    3.01 
  -1   8  -3    7.48    0.77 
   0   8  -3   62.61    4.14 
   1   8  -3    2.28    0.39 
   2   8  -3    0.41    0.28 
   6   8  -3    6.23    0.73 
   7   8  -3    0.15    0.21 
 -12   9  -3    4.73    0.48 
 -11   9  -3    7.86    0.67 
 -10   9  -3    1.05    0.29 
  -9   9  -3    0.75    0.27 
  -8   9  -3    2.17    0.35 
  -7   9  -3    1.01    0.28 
  -1   9  -3    5.24    0.59 
   0   9  -3    0.73    0.31 
   5   9  -3    8.17    0.99 
   6   9  -3    3.62    0.45 
 -12  10  -3    7.70    0.64 
 -11  10  -3    2.25    0.39 
 -10  10  -3    0.98    0.28 
  -9  10  -3   10.08    0.82 
  -8  10  -3    0.42    0.27 
  -7  10  -3   17.83    1.26 
  -2  10  -3    3.00    0.50 
   4  10  -3   -0.21    0.31 
   5  10  -3   11.42    0.99 
 -11  11  -3   36.56    2.56 
 -10  11  -3   22.67    1.71 
  -9  11  -3    1.58    0.31 
  -8  11  -3    7.35    0.66 
  -7  11  -3    7.69    0.71 
   3  11  -3    1.09    0.32 
   4  11  -3    0.22    0.20 
 -10  12  -3   19.32    1.40 
  -9  12  -3    1.45    0.31 
  -8  12  -3    0.31    0.27 
  -7  12  -3    0.62    0.29 
   1  12  -3   12.99    1.22 
   2  12  -3    4.97    0.58 
  -8  13  -3    0.19    0.25 
  -7  13  -3    3.46    0.46 
  10 -15  -2    1.09    0.19 
  11 -15  -2    0.48    0.16 
   9 -14  -2    1.58    0.25 
  10 -14  -2    1.79    0.25 
  11 -14  -2    4.31    0.40 
  12 -14  -2    0.51    0.18 
  13 -14  -2    0.44    0.15 
  -1 -13  -2    0.38    0.15 
   5 -13  -2    0.85    0.29 
   6 -13  -2    0.10    0.25 
   8 -13  -2    0.31    0.22 
   9 -13  -2    0.72    0.23 
  10 -13  -2    3.47    0.45 
  11 -13  -2   16.82    1.15 
  12 -13  -2    0.35    0.21 
  13 -13  -2    1.86    0.29 
  14 -13  -2    0.33    0.15 
  -2 -12  -2    0.64    0.21 
  -1 -12  -2    0.41    0.24 
   0 -12  -2    8.35    0.89 
   1 -12  -2    2.72    0.45 
   2 -12  -2    3.89    0.56 
   3 -12  -2    0.26    0.28 
   4 -12  -2    0.27    0.28 
   5 -12  -2    0.29    0.27 
   6 -12  -2    1.53    0.32 
   7 -12  -2    1.85    0.33 
   8 -12  -2    2.61    0.42 
   9 -12  -2    2.71    0.41 
  10 -12  -2    2.26    0.30 
  11 -12  -2    4.39    0.48 
  12 -12  -2    9.54    0.72 
  13 -12  -2    2.42    0.36 
  14 -12  -2    1.26    0.14 
  -4 -11  -2    0.24    0.19 
  -3 -11  -2    3.35    0.51 
  -2 -11  -2   15.95    1.51 
  -1 -11  -2    4.81    0.40 
   0 -11  -2    1.70    0.27 
   1 -11  -2   14.13    1.19 
   2 -11  -2    2.80    0.42 
   3 -11  -2    1.89    0.39 
   4 -11  -2    0.64    0.29 
   5 -11  -2    0.55    0.25 
   6 -11  -2    3.26    0.44 
   7 -11  -2    1.15    0.30 
   9 -11  -2   11.61    0.89 
  10 -11  -2   12.53    0.91 
  11 -11  -2    3.05    0.44 
  12 -11  -2    2.70    0.22 
  13 -11  -2    2.54    0.19 
  14 -11  -2    0.09    0.11 
  15 -11  -2    2.21    0.16 
  -5 -10  -2    1.10    0.24 
  -4 -10  -2    2.13    0.44 
  -3 -10  -2    5.73    0.65 
  -2 -10  -2    1.25    0.24 
  -1 -10  -2   11.90    0.76 
   0 -10  -2    5.34    0.44 
   1 -10  -2    0.29    0.31 
   2 -10  -2   17.52    1.16 
   3 -10  -2    8.32    0.61 
   4 -10  -2   14.54    1.01 
   5 -10  -2   34.61    1.92 
   6 -10  -2    5.54    0.47 
   7 -10  -2    6.38    0.58 
   8 -10  -2    7.32    0.67 
  10 -10  -2    4.64    0.35 
  11 -10  -2   15.70    0.63 
  12 -10  -2    5.31    0.29 
  13 -10  -2    0.56    0.12 
  14 -10  -2    2.22    0.22 
  15 -10  -2    1.12    0.12 
  -6  -9  -2    1.56    0.34 
  -5  -9  -2    1.45    0.34 
  -4  -9  -2    0.33    0.18 
  -3  -9  -2    2.29    0.29 
  -2  -9  -2   12.70    0.75 
  -1  -9  -2    0.36    0.29 
   0  -9  -2    3.79    0.46 
   1  -9  -2   12.98    0.84 
   2  -9  -2    0.31    0.24 
   3  -9  -2   81.74    3.99 
   4  -9  -2   10.35    0.59 
   5  -9  -2    2.63    0.34 
   6  -9  -2   16.60    1.02 
   7  -9  -2   13.05    1.00 
   8  -9  -2    1.09    0.18 
   9  -9  -2    3.64    0.40 
  10  -9  -2    0.58    0.17 
  11  -9  -2    2.62    0.22 
  12  -9  -2    0.13    0.13 
  13  -9  -2    0.30    0.12 
  14  -9  -2    4.10    0.22 
  15  -9  -2   10.87    0.71 
  -7  -8  -2    1.23    0.25 
  -6  -8  -2    0.07    0.27 
  -5  -8  -2    0.70    0.20 
  -4  -8  -2    2.75    0.35 
  -3  -8  -2   11.70    0.67 
  -2  -8  -2    7.44    0.69 
  -1  -8  -2    1.58    0.31 
   0  -8  -2   19.20    1.11 
   1  -8  -2    2.69    0.35 
   2  -8  -2    4.74    0.37 
   3  -8  -2   14.20    0.82 
   4  -8  -2  175.93    7.35 
   5  -8  -2   51.37    2.48 
   6  -8  -2   20.94    1.09 
   7  -8  -2   11.01    0.62 
   8  -8  -2   19.08    0.93 
   9  -8  -2   11.08    0.87 
  10  -8  -2   20.55    1.33 
  11  -8  -2    2.84    0.29 
  12  -8  -2    0.43    0.14 
  13  -8  -2    0.73    0.13 
  14  -8  -2    1.78    0.20 
  15  -8  -2    2.42    0.23 
  -8  -7  -2    1.56    0.35 
  -7  -7  -2    0.52    0.29 
  -6  -7  -2    0.27    0.19 
  -5  -7  -2    1.96    0.25 
  -4  -7  -2    1.16    0.25 
  -3  -7  -2    7.12    0.57 
  -2  -7  -2   13.49    0.81 
  -1  -7  -2   13.80    0.69 
   0  -7  -2   24.28    1.25 
   1  -7  -2    1.48    0.22 
   2  -7  -2    4.15    0.35 
   3  -7  -2  101.41    3.99 
   4  -7  -2    1.87    0.24 
   5  -7  -2   68.97    3.05 
   6  -7  -2   35.68    1.76 
   7  -7  -2   25.53    1.23 
   8  -7  -2    3.20    0.27 
   9  -7  -2    0.67    0.22 
  10  -7  -2    8.04    0.62 
  11  -7  -2    0.56    0.17 
  12  -7  -2    0.43    0.12 
  13  -7  -2    0.34    0.12 
  14  -7  -2    1.20    0.12 
  15  -7  -2    0.53    0.10 
  -8  -6  -2    2.56    0.45 
  -7  -6  -2    0.24    0.18 
  -6  -6  -2    1.34    0.24 
  -5  -6  -2    3.48    0.45 
  -4  -6  -2    4.14    0.47 
  -3  -6  -2   18.26    1.14 
  -2  -6  -2   17.86    1.03 
  -1  -6  -2   36.85    1.51 
   0  -6  -2    6.54    0.42 
   1  -6  -2   14.95    0.74 
   2  -6  -2    0.90    0.49 
   3  -6  -2  105.87    5.94 
   4  -6  -2   11.74    0.81 
   5  -6  -2   83.14    4.54 
   6  -6  -2    6.53    0.42 
   7  -6  -2    1.18    0.24 
   8  -6  -2    3.92    0.38 
   9  -6  -2   84.77    5.26 
  10  -6  -2   16.54    1.17 
  11  -6  -2    0.49    0.14 
  12  -6  -2    1.85    0.16 
  13  -6  -2    0.20    0.12 
  14  -6  -2    0.03    0.09 
  15  -6  -2    1.20    0.12 
  -8  -5  -2    0.83    0.24 
  -7  -5  -2    0.25    0.20 
  -6  -5  -2    0.45    0.25 
  -5  -5  -2   38.05    2.17 
  -4  -5  -2    3.96    0.38 
  -3  -5  -2   47.15    2.86 
  -2  -5  -2   78.50    2.90 
  -1  -5  -2   89.68    3.38 
   0  -5  -2    5.72    0.56 
   1  -5  -2   34.23    1.89 
   2  -5  -2    6.50    0.71 
   3  -5  -2  172.93    8.11 
   4  -5  -2   34.99    1.85 
   5  -5  -2    4.94    0.47 
   6  -5  -2   16.43    1.19 
   8  -5  -2   14.80    1.07 
   9  -5  -2   10.93    0.69 
  10  -5  -2   39.34    2.43 
  11  -5  -2    2.98    0.25 
  12  -5  -2    1.56    0.16 
  13  -5  -2    0.55    0.12 
  14  -5  -2    2.30    0.20 
  15  -5  -2    0.82    0.15 
  -9  -4  -2    0.02    0.23 
  -8  -4  -2    0.33    0.24 
  -7  -4  -2    1.03    0.27 
  -6  -4  -2   19.23    1.10 
  -5  -4  -2    7.46    0.62 
  -4  -4  -2  183.76    9.96 
  -3  -4  -2    2.50    0.27 
  -2  -4  -2    9.13    0.51 
  -1  -4  -2   33.55    1.74 
   0  -4  -2  205.64    9.57 
   1  -4  -2  229.75   10.97 
   2  -4  -2   25.51    1.28 
   3  -4  -2  284.85   13.21 
   4  -4  -2  212.96   10.65 
   5  -4  -2   39.25    2.56 
   6  -4  -2    2.53    0.36 
   8  -4  -2  187.56   11.55 
   9  -4  -2    2.67    0.36 
  10  -4  -2    6.29    0.48 
  11  -4  -2    1.83    0.16 
  12  -4  -2    2.63    0.22 
  13  -4  -2    0.12    0.13 
  14  -4  -2    1.87    0.30 
  15  -4  -2    0.41    0.12 
  -9  -3  -2    0.46    0.24 
  -8  -3  -2    3.42    0.42 
  -7  -3  -2    6.94    0.59 
  -6  -3  -2   82.68    5.41 
  -5  -3  -2   17.51    1.10 
  -4  -3  -2   88.62    6.35 
  -2  -3  -2  207.70    9.24 
  -1  -3  -2  301.42   13.29 
   0  -3  -2  123.58    5.96 
   1  -3  -2  372.82   19.85 
   2  -3  -2  612.75   53.66 
   3  -3  -2  124.69   10.42 
   4  -3  -2  240.12   12.21 
   5  -3  -2    8.73    0.63 
   6  -3  -2  108.80    7.49 
   8  -3  -2   52.74    3.27 
   9  -3  -2   18.72    1.23 
  10  -3  -2    5.87    0.53 
  11  -3  -2    9.89    0.56 
  12  -3  -2    2.44    0.44 
  13  -3  -2    3.84    0.46 
  14  -3  -2    4.26    0.37 
 -10  -2  -2    6.45    0.51 
  -9  -2  -2    2.89    0.40 
  -8  -2  -2   21.88    1.36 
  -7  -2  -2    0.75    0.22 
  -6  -2  -2    3.30    0.37 
  -5  -2  -2    4.14    0.38 
  -4  -2  -2    2.53    0.26 
  -2  -2  -2   31.16    2.01 
  -1  -2  -2  707.44   34.13 
   0  -2  -2    0.82    0.53 
   1  -2  -2  172.00   15.99 
   2  -2  -2    1.29    0.31 
   3  -2  -2  410.15   31.14 
   4  -2  -2   25.07    1.32 
   5  -2  -2  170.08   11.67 
   8  -2  -2   24.54    1.35 
   9  -2  -2   15.07    0.99 
  11  -2  -2   11.21    0.93 
  12  -2  -2    2.75    0.41 
  13  -2  -2   17.06    1.17 
  14  -2  -2    0.44    0.14 
 -10  -1  -2   16.74    1.13 
  -9  -1  -2    0.55    0.25 
  -8  -1  -2   12.53    0.90 
  -7  -1  -2    3.47    0.34 
  -6  -1  -2    1.06    0.20 
  -5  -1  -2   15.92    1.08 
   0  -1  -2    3.19    0.46 
   1  -1  -2    3.07    0.36 
   2  -1  -2  206.36   15.90 
   3  -1  -2  661.21   53.55 
   4  -1  -2  292.47   14.77 
   5  -1  -2   33.59    2.25 
   6  -1  -2   88.11    5.74 
  10  -1  -2    0.70    0.27 
  11  -1  -2   12.62    0.95 
  12  -1  -2    4.08    0.48 
  13  -1  -2    0.86    0.18 
  14  -1  -2    0.30    0.11 
 -11   0  -2    3.21    0.37 
 -10   0  -2    4.83    0.48 
  -9   0  -2    3.24    0.42 
  -8   0  -2   18.59    1.31 
  -7   0  -2   26.78    1.75 
  -6   0  -2    6.19    0.51 
   2   0  -2    1.28    0.16 
   3   0  -2  125.07    6.57 
   4   0  -2  201.47   10.60 
   5   0  -2    4.93    0.47 
   6   0  -2    7.09    0.57 
  10   0  -2    4.18    0.53 
  11   0  -2    3.60    0.42 
  12   0  -2    9.41    0.70 
  13   0  -2    0.95    0.17 
 -11   1  -2   12.83    0.92 
 -10   1  -2    0.80    0.25 
  -9   1  -2    1.02    0.26 
  -8   1  -2   10.60    0.89 
  -7   1  -2   34.34    2.38 
  -6   1  -2   82.20    5.77 
   2   1  -2  409.47   31.13 
   3   1  -2  251.12   12.20 
   4   1  -2   39.53    1.95 
   5   1  -2   16.09    1.11 
   6   1  -2    1.61    0.29 
   9   1  -2    0.54    0.25 
  10   1  -2   15.91    1.14 
  11   1  -2    2.65    0.38 
  12   1  -2    2.37    0.29 
 -11   2  -2   11.70    0.90 
 -10   2  -2    7.82    0.64 
  -9   2  -2   13.80    1.00 
  -8   2  -2   21.70    1.38 
  -7   2  -2   70.74    4.87 
   2   2  -2   24.35    1.32 
   3   2  -2    8.77    0.48 
   4   2  -2    2.54    0.23 
   5   2  -2    4.80    0.45 
   6   2  -2    2.96    0.43 
   9   2  -2    2.53    0.35 
  10   2  -2    6.25    0.53 
 -12   3  -2    2.17    0.35 
 -11   3  -2   10.25    0.80 
 -10   3  -2    5.67    0.57 
  -9   3  -2   17.27    1.27 
  -8   3  -2   49.96    3.36 
  -7   3  -2    2.72    0.28 
   2   3  -2  179.52    9.02 
   3   3  -2  114.11    5.77 
   4   3  -2   89.66    4.86 
   5   3  -2   16.13    1.13 
   6   3  -2   74.48    5.37 
 -12   4  -2    2.62    0.38 
 -11   4  -2    1.41    0.29 
 -10   4  -2    5.64    0.51 
  -9   4  -2    2.99    0.38 
  -8   4  -2  179.91   11.89 
  -7   4  -2   93.02    6.35 
   1   4  -2   32.66    2.74 
   2   4  -2    8.43    0.54 
   3   4  -2    1.94    0.24 
   4   4  -2  175.92    9.09 
   5   4  -2    7.43    0.72 
   6   4  -2   15.92    1.23 
 -12   5  -2    1.86    0.31 
 -11   5  -2    3.15    0.42 
 -10   5  -2   37.46    2.50 
  -9   5  -2    9.50    0.69 
  -8   5  -2   14.75    1.09 
  -7   5  -2    4.33    0.39 
  -6   5  -2   15.54    1.09 
   1   5  -2   90.17    4.44 
   2   5  -2   75.71    3.75 
   3   5  -2   47.85    2.59 
   4   5  -2    3.39    0.31 
   5   5  -2   34.37    2.50 
   8   5  -2    0.82    0.34 
 -12   6  -2    1.59    0.30 
 -11   6  -2    0.38    0.25 
 -10   6  -2   17.02    1.20 
  -9   6  -2   79.32    5.40 
  -8   6  -2    3.35    0.38 
  -7   6  -2    1.57    0.23 
  -6   6  -2    6.41    0.52 
   0   6  -2    6.75    0.68 
   1   6  -2   35.46    1.86 
   2   6  -2   18.13    1.09 
   3   6  -2   18.31    1.30 
   4   6  -2    4.46    0.54 
   5   6  -2    3.60    0.47 
   8   6  -2    2.14    0.37 
 -12   7  -2    0.37    0.26 
 -11   7  -2    0.72    0.25 
 -10   7  -2    7.33    0.64 
  -9   7  -2    0.40    0.22 
  -8   7  -2    3.47    0.37 
  -7   7  -2   27.38    1.77 
   0   7  -2   25.26    1.38 
   1   7  -2   14.03    0.74 
   2   7  -2   13.98    1.06 
   3   7  -2    6.64    0.63 
   7   7  -2    1.14    0.34 
   8   7  -2    1.55    0.36 
 -12   8  -2    0.04    0.24 
 -11   8  -2    3.24    0.43 
 -10   8  -2   21.01    1.37 
  -9   8  -2   11.45    0.91 
  -8   8  -2   18.86    1.33 
  -7   8  -2   10.99    0.90 
  -1   8  -2    2.36    0.50 
   0   8  -2   19.11    1.38 
   1   8  -2    1.21    0.33 
   2   8  -2    7.24    0.69 
   7   8  -2    1.00    0.26 
 -12   9  -2    0.26    0.23 
 -11   9  -2    3.16    0.42 
 -10   9  -2    0.58    0.26 
  -9   9  -2    3.56    0.43 
  -8   9  -2    0.93    0.28 
  -7   9  -2   13.30    1.02 
  -1   9  -2   13.89    0.99 
   0   9  -2    3.51    0.50 
   6   9  -2    1.43    0.30 
 -12  10  -2    4.88    0.50 
 -11  10  -2   16.67    1.14 
 -10  10  -2    4.01    0.50 
  -9  10  -2    0.63    0.27 
  -8  10  -2    7.60    0.67 
  -7  10  -2    5.58    0.60 
  -2  10  -2   17.62    1.42 
   5  10  -2    1.03    0.27 
 -11  11  -2    2.96    0.40 
 -10  11  -2   11.67    0.93 
  -9  11  -2   10.97    0.92 
  -8  11  -2    9.56    0.83 
  -7  11  -2    1.97    0.35 
   3  11  -2    3.16    0.60 
   4  11  -2    0.42    0.22 
 -10  12  -2    2.21    0.36 
  -9  12  -2    2.05    0.38 
  -8  12  -2    2.71    0.42 
  -7  12  -2    1.61    0.33 
   1  12  -2    0.45    0.29 
   2  12  -2    0.60    0.25 
  -8  13  -2    0.96    0.26 
  -7  13  -2    0.39    0.25 
  10 -15  -1    4.19    0.39 
  11 -15  -1    1.21    0.19 
   9 -14  -1   13.59    0.92 
  10 -14  -1    1.03    0.22 
  11 -14  -1    0.71    0.20 
  12 -14  -1    0.46    0.18 
  13 -14  -1    2.02    0.26 
  -1 -13  -1    2.31    0.29 
   4 -13  -1    3.60    0.52 
   5 -13  -1    7.91    0.71 
   6 -13  -1    0.46    0.27 
   7 -13  -1    8.15    0.68 
   8 -13  -1    1.02    0.26 
   9 -13  -1   15.70    1.15 
  10 -13  -1   16.17    1.11 
  11 -13  -1    2.48    0.38 
  12 -13  -1    1.96    0.34 
  13 -13  -1    2.83    0.34 
  14 -13  -1    0.41    0.16 
  -2 -12  -1    0.23    0.21 
  -1 -12  -1    1.85    0.38 
   1 -12  -1    7.61    0.76 
   2 -12  -1    3.91    0.52 
   3 -12  -1   22.17    1.61 
   4 -12  -1    6.40    0.62 
   5 -12  -1    5.92    0.60 
   6 -12  -1    0.06    0.26 
   7 -12  -1    6.51    0.43 
   8 -12  -1    0.67    0.19 
   9 -12  -1    0.63    0.25 
  10 -12  -1    6.08    0.58 
  11 -12  -1   20.57    1.35 
  12 -12  -1    3.49    0.45 
  13 -12  -1    1.64    0.24 
  14 -12  -1    8.75    0.62 
  -4 -11  -1    1.49    0.31 
  -3 -11  -1    1.02    0.26 
  -1 -11  -1   18.39    1.10 
   0 -11  -1    2.16    0.27 
   1 -11  -1   -0.01    0.30 
   2 -11  -1    0.97    0.34 
   3 -11  -1    4.41    0.55 
   4 -11  -1   12.51    0.92 
   5 -11  -1    0.82    0.27 
   6 -11  -1    1.05    0.29 
   7 -11  -1   25.96    1.89 
   8 -11  -1    6.60    0.61 
   9 -11  -1   10.08    0.83 
  10 -11  -1   14.01    0.98 
  11 -11  -1    2.28    0.31 
  12 -11  -1    9.40    0.40 
  13 -11  -1    0.15    0.11 
  14 -11  -1    2.50    0.21 
  15 -11  -1    1.22    0.12 
  -5 -10  -1    5.20    0.49 
  -4 -10  -1    0.44    0.28 
  -3 -10  -1   15.50    1.49 
  -2 -10  -1    7.20    0.49 
  -1 -10  -1   11.43    0.81 
   0 -10  -1   14.85    0.92 
   1 -10  -1    2.66    0.41 
   2 -10  -1   11.49    0.78 
   3 -10  -1    3.38    0.44 
   4 -10  -1   15.68    0.94 
   5 -10  -1    7.87    0.65 
   6 -10  -1   21.76    1.19 
   7 -10  -1    6.80    0.61 
   8 -10  -1    0.18    0.27 
   9 -10  -1    1.83    0.36 
  10 -10  -1   15.51    0.77 
  11 -10  -1    0.25    0.13 
  12 -10  -1    4.34    0.26 
  13 -10  -1    0.24    0.12 
  14 -10  -1    1.71    0.14 
  15 -10  -1    0.30    0.12 
  -6  -9  -1    1.05    0.25 
  -5  -9  -1   12.59    1.23 
  -4  -9  -1   17.04    0.95 
  -3  -9  -1    1.70    0.24 
  -2  -9  -1   10.76    0.69 
  -1  -9  -1    1.04    0.35 
   0  -9  -1    4.04    0.50 
   1  -9  -1   35.46    1.92 
   2  -9  -1   37.78    1.93 
   3  -9  -1    3.11    0.42 
   4  -9  -1   74.07    3.21 
   5  -9  -1   18.32    0.89 
   6  -9  -1   12.74    0.86 
   7  -9  -1    3.90    0.40 
   8  -9  -1   22.76    1.64 
   9  -9  -1    5.10    0.36 
  10  -9  -1    2.40    0.24 
  11  -9  -1    1.25    0.16 
  12  -9  -1   22.57    0.86 
  13  -9  -1    5.11    0.27 
  14  -9  -1    0.67    0.11 
  15  -9  -1    0.69    0.14 
  -7  -8  -1   11.47    1.17 
  -6  -8  -1   21.83    1.67 
  -5  -8  -1    2.89    0.31 
  -4  -8  -1    1.50    0.24 
  -3  -8  -1    5.89    0.50 
  -2  -8  -1    0.02    0.27 
  -1  -8  -1   23.85    1.34 
   0  -8  -1   22.86    1.21 
   1  -8  -1    4.75    0.47 
   2  -8  -1  146.29    6.14 
   3  -8  -1   95.06    3.88 
   4  -8  -1    1.17    0.54 
   5  -8  -1   19.28    0.97 
   6  -8  -1   10.42    0.64 
   7  -8  -1    5.57    0.31 
   8  -8  -1   19.71    1.00 
   9  -8  -1   35.80    1.72 
  10  -8  -1   10.54    0.79 
  11  -8  -1    3.93    0.34 
  12  -8  -1    6.03    0.33 
  13  -8  -1    8.33    0.37 
  14  -8  -1    8.12    0.40 
  15  -8  -1   10.34    0.70 
  -8  -7  -1   11.67    1.00 
  -7  -7  -1    1.20    0.31 
  -6  -7  -1    7.39    0.52 
  -5  -7  -1    6.24    0.49 
  -4  -7  -1   29.49    1.50 
  -3  -7  -1    8.18    0.60 
  -2  -7  -1    4.03    0.41 
  -1  -7  -1    4.50    0.43 
   0  -7  -1  140.31    5.94 
   1  -7  -1  115.09    4.49 
   2  -7  -1    2.61    0.30 
   3  -7  -1   99.47    4.11 
   4  -7  -1   66.72    2.78 
   5  -7  -1    0.40    0.16 
   6  -7  -1   26.78    1.38 
   7  -7  -1  147.68    5.46 
   8  -7  -1    6.70    0.40 
   9  -7  -1   37.74    2.41 
  10  -7  -1    3.81    0.42 
  11  -7  -1   11.41    0.59 
  12  -7  -1    5.59    0.32 
  13  -7  -1    0.58    0.13 
  14  -7  -1    1.32    0.12 
  15  -7  -1   13.77    0.61 
  -8  -6  -1    6.85    0.79 
  -7  -6  -1    0.82    0.20 
  -6  -6  -1    0.22    0.20 
  -5  -6  -1    2.12    0.31 
  -4  -6  -1   20.07    1.30 
  -3  -6  -1   16.91    0.97 
  -2  -6  -1   10.01    0.59 
  -1  -6  -1   29.42    1.21 
   0  -6  -1    4.86    0.41 
   1  -6  -1   30.66    1.34 
   2  -6  -1  159.22    8.25 
   3  -6  -1   37.43    1.90 
   4  -6  -1   20.36    1.32 
   5  -6  -1    2.83    0.41 
   6  -6  -1    6.50    0.40 
   7  -6  -1  107.55    5.04 
   8  -6  -1  154.70    9.56 
   9  -6  -1    4.67    0.45 
  10  -6  -1   15.58    1.05 
  11  -6  -1    0.91    0.15 
  12  -6  -1    0.30    0.13 
  13  -6  -1    7.77    0.36 
  14  -6  -1   17.83    0.71 
  15  -6  -1    0.71    0.10 
  -8  -5  -1    8.21    0.66 
  -7  -5  -1    6.83    0.46 
  -6  -5  -1    0.88    0.26 
  -5  -5  -1   11.40    0.71 
  -4  -5  -1   14.95    1.05 
  -3  -5  -1   21.83    1.18 
  -2  -5  -1    1.00    0.19 
  -1  -5  -1    2.30    0.24 
   0  -5  -1   21.40    1.25 
   1  -5  -1    4.86    0.45 
   2  -5  -1   34.38    1.90 
   3  -5  -1  148.66    7.36 
   4  -5  -1    2.68    0.35 
   5  -5  -1   23.30    1.25 
   6  -5  -1   34.57    2.26 
   7  -5  -1    3.75    0.31 
   8  -5  -1   96.30    5.84 
   9  -5  -1   75.78    4.85 
  10  -5  -1    8.53    0.72 
  11  -5  -1    1.51    0.16 
  12  -5  -1    6.89    0.33 
  13  -5  -1    1.43    0.14 
  14  -5  -1   13.42    0.63 
  15  -5  -1    3.84    0.23 
  -9  -4  -1    5.65    0.49 
  -8  -4  -1    5.31    0.56 
  -7  -4  -1   10.90    0.87 
  -6  -4  -1   14.05    0.97 
  -5  -4  -1   79.83    4.99 
  -4  -4  -1    3.32    0.33 
  -3  -4  -1   74.27    3.64 
  -2  -4  -1   22.67    1.06 
  -1  -4  -1    1.84    0.39 
   0  -4  -1   28.54    1.43 
   1  -4  -1   51.91    2.55 
   2  -4  -1   27.55    1.40 
   3  -4  -1   12.34    0.76 
   4  -4  -1   26.80    1.48 
   5  -4  -1    3.47    0.34 
   6  -4  -1  155.11   10.44 
   7  -4  -1  105.71    6.57 
   8  -4  -1    2.91    0.33 
   9  -4  -1   20.54    1.15 
  10  -4  -1   21.13    1.41 
  11  -4  -1   26.22    1.04 
  12  -4  -1    0.81    0.14 
  13  -4  -1   15.91    0.79 
  14  -4  -1    1.40    0.21 
  15  -4  -1    1.53    0.20 
  -9  -3  -1   22.78    1.56 
  -8  -3  -1    5.59    0.48 
  -7  -3  -1    4.32    0.43 
  -6  -3  -1    5.87    0.45 
  -5  -3  -1   83.85    5.99 
  -4  -3  -1   96.60    6.57 
  -3  -3  -1   40.12    2.57 
  -2  -3  -1  155.28    7.45 
  -1  -3  -1   12.86    0.92 
   0  -3  -1    6.17    0.52 
   1  -3  -1   51.99    2.75 
   2  -3  -1    3.08    0.35 
   3  -3  -1    7.54    0.46 
   4  -3  -1   54.60    2.76 
   5  -3  -1   39.53    2.03 
   6  -3  -1   29.84    2.17 
   7  -3  -1   67.58    4.42 
   8  -3  -1   17.37    1.33 
   9  -3  -1   13.39    1.01 
  10  -3  -1    6.13    0.55 
  11  -3  -1    7.05    0.33 
  12  -3  -1    1.05    0.27 
  13  -3  -1   16.75    1.14 
  14  -3  -1    0.51    0.17 
 -10  -2  -1    4.01    0.44 
  -9  -2  -1    1.73    0.28 
  -8  -2  -1   10.28    0.81 
  -7  -2  -1   34.54    2.46 
  -6  -2  -1  150.45    9.83 
  -5  -2  -1    4.00    0.34 
  -2  -2  -1   25.70    1.46 
  -1  -2  -1    4.26    0.55 
   0  -2  -1  257.14   22.83 
   1  -2  -1    2.52    0.46 
   2  -2  -1  319.38   22.75 
   3  -2  -1   55.54    4.18 
   4  -2  -1   23.27    1.26 
   5  -2  -1  140.81    7.24 
   6  -2  -1   21.31    1.51 
   7  -2  -1    0.97    0.27 
   8  -2  -1   10.40    0.74 
   9  -2  -1    3.83    0.41 
  11  -2  -1   11.37    0.87 
  12  -2  -1    5.60    0.60 
  13  -2  -1    2.92    0.38 
  14  -2  -1    0.46    0.15 
 -10  -1  -1    0.61    0.24 
  -9  -1  -1    2.11    0.38 
  -8  -1  -1   38.34    2.46 
  -7  -1  -1    8.85    0.55 
  -6  -1  -1   97.11    7.10 
  -5  -1  -1   33.59    2.17 
  -1  -1  -1    1.38    0.42 
   0  -1  -1  528.99   46.58 
   1  -1  -1  628.82   46.54 
   2  -1  -1    1.80    0.18 
   3  -1  -1    3.16    0.32 
   4  -1  -1   11.83    0.66 
   5  -1  -1    2.34    0.21 
   6  -1  -1    2.16    0.33 
   7  -1  -1   25.80    1.90 
  10  -1  -1    2.60    0.34 
  11  -1  -1   15.95    1.03 
  12  -1  -1   20.85    1.38 
  13  -1  -1    1.28    0.22 
  14  -1  -1    1.89    0.23 
 -11   0  -1    2.32    0.34 
 -10   0  -1   16.08    1.12 
  -9   0  -1    5.64    0.49 
  -8   0  -1   18.24    1.42 
  -7   0  -1  144.99    9.51 
  -6   0  -1    6.85    0.48 
   1   0  -1  565.28   46.55 
   2   0  -1  268.14   22.70 
   3   0  -1    7.13    0.40 
   4   0  -1   26.02    1.43 
   5   0  -1   21.64    1.16 
   6   0  -1    6.27    0.55 
   7   0  -1  136.67    9.43 
  10   0  -1   15.07    1.14 
  11   0  -1    1.44    0.30 
  12   0  -1    4.19    0.42 
  13   0  -1    2.86    0.29 
 -11   1  -1   16.24    1.00 
 -10   1  -1    2.79    0.37 
  -9   1  -1   23.65    1.62 
  -8   1  -1    5.90    0.47 
  -7   1  -1   25.09    1.86 
  -6   1  -1    2.23    0.26 
   1   1  -1    1.28    0.18 
   2   1  -1   51.50    2.65 
   3   1  -1   55.35    2.74 
   4   1  -1    4.03    0.28 
   5   1  -1   33.52    1.68 
   6   1  -1  100.96    7.05 
   7   1  -1    7.02    0.62 
   9   1  -1    2.33    0.34 
  10   1  -1    0.40    0.24 
  11   1  -1    9.26    0.72 
  12   1  -1    1.10    0.19 
 -12   2  -1    5.67    0.54 
 -11   2  -1   11.31    0.82 
 -10   2  -1    0.06    0.23 
  -9   2  -1    3.65    0.42 
  -8   2  -1    9.92    0.75 
  -7   2  -1    0.83    0.18 
   2   2  -1   22.56    1.26 
   3   2  -1   42.44    2.02 
   4   2  -1  159.69    8.04 
   5   2  -1    3.39    0.29 
   6   2  -1  150.28    9.74 
   7   2  -1   32.43    2.48 
   9   2  -1    1.08    0.27 
  10   2  -1    3.58    0.46 
  11   2  -1    0.58    0.18 
 -12   3  -1    1.03    0.24 
 -11   3  -1    6.64    0.58 
 -10   3  -1    6.29    0.60 
  -9   3  -1   13.72    1.05 
  -8   3  -1   18.67    1.37 
  -7   3  -1   64.27    4.40 
   1   3  -1   12.50    1.04 
   2   3  -1  143.06    7.25 
   3   3  -1   28.71    1.66 
   4   3  -1  102.33    5.03 
   5   3  -1   82.39    5.95 
   6   3  -1    4.99    0.51 
 -12   4  -1    0.92    0.25 
 -11   4  -1   27.79    1.88 
 -10   4  -1   21.50    1.45 
  -9   4  -1   18.17    1.18 
  -8   4  -1    3.26    0.32 
  -7   4  -1   94.30    6.56 
   1   4  -1    1.75    0.19 
   2   4  -1   22.56    1.16 
   3   4  -1   65.00    3.38 
   4   4  -1    2.47    0.27 
   5   4  -1   77.42    4.97 
   6   4  -1   12.77    1.10 
 -12   5  -1    7.01    0.59 
 -11   5  -1    1.57    0.30 
 -10   5  -1    9.17    0.74 
  -9   5  -1   75.56    4.98 
  -8   5  -1   90.00    5.99 
  -7   5  -1    4.13    0.35 
  -6   5  -1   32.00    2.17 
   1   5  -1    2.26    0.23 
   2   5  -1    0.63    0.16 
   3   5  -1   20.29    1.09 
   4   5  -1   13.92    0.92 
   5   5  -1    9.76    0.79 
   6   5  -1    0.78    0.30 
 -12   6  -1    0.55    0.25 
 -11   6  -1    0.79    0.26 
 -10   6  -1   14.85    1.07 
  -8   6  -1  147.92    9.83 
  -7   6  -1  102.96    7.10 
  -6   6  -1    6.94    0.50 
   0   6  -1    4.47    0.61 
   1   6  -1   29.45    1.46 
   2   6  -1    9.93    0.62 
   3   6  -1   15.50    1.10 
   4   6  -1   20.33    1.49 
   8   6  -1    7.08    0.83 
 -12   7  -1    6.21    0.57 
 -11   7  -1   11.18    0.87 
 -10   7  -1    3.88    0.44 
  -9   7  -1   35.99    2.47 
  -8   7  -1    7.90    0.55 
  -7   7  -1  147.54    9.52 
  -1   7  -1  114.91    8.61 
   0   7  -1  147.74    7.30 
   1   7  -1    4.50    0.40 
   2   7  -1    4.20    0.49 
   3   7  -1    7.57    0.67 
   8   7  -1   11.03    1.02 
 -15   8  -1   10.10    0.67 
 -11   8  -1    4.38    0.48 
 -10   8  -1    9.29    0.81 
  -9   8  -1   38.10    2.46 
  -8   8  -1   19.41    1.44 
  -7   8  -1    5.85    0.49 
  -1   8  -1    4.05    0.70 
   0   8  -1   24.46    1.51 
   1   8  -1   24.90    1.69 
   2   8  -1    0.66    0.28 
   7   8  -1   13.00    1.20 
 -11   9  -1    1.24    0.29 
 -10   9  -1    2.16    0.39 
  -9   9  -1    5.27    0.49 
  -8   9  -1   22.69    1.63 
  -7   9  -1    3.53    0.45 
  -1   9  -1   35.22    2.50 
   0   9  -1    4.57    0.57 
   6   9  -1    0.90    0.27 
 -11  10  -1    0.20    0.25 
 -10  10  -1   15.88    1.13 
  -9  10  -1    2.18    0.39 
  -8  10  -1   -0.06    0.25 
  -7  10  -1    5.79    0.63 
  -2  10  -1   11.22    0.91 
   5  10  -1    5.42    0.56 
 -10  11  -1   14.44    1.01 
  -9  11  -1   10.19    0.84 
  -8  11  -1    6.02    0.61 
  -7  11  -1   26.63    1.90 
   4  11  -1    1.47    0.28 
 -10  12  -1    5.36    0.56 
  -9  12  -1    0.58    0.26 
  -8  12  -1    0.45    0.26 
  -7  12  -1    6.23    0.62 
   2  12  -1    0.39    0.25 
  -8  13  -1    1.11    0.28 
  -7  13  -1    7.93    0.66 
   1  13  -1    2.21    0.33 
   9 -15   0   23.44    1.51 
  10 -15   0    3.73    0.33 
  11 -15   0    0.10    0.15 
   8 -14   0   13.71    0.86 
   9 -14   0   17.65    1.30 
  10 -14   0    6.24    0.51 
  11 -14   0    2.18    0.31 
  12 -14   0    0.46    0.17 
  13 -14   0    1.04    0.17 
  -1 -13   0    0.65    0.17 
   4 -13   0    5.67    0.57 
   5 -13   0    0.61    0.30 
   6 -13   0    9.01    0.75 
   7 -13   0    4.45    0.36 
   8 -13   0   36.72    1.74 
   9 -13   0    5.08    0.48 
  10 -13   0    0.82    0.24 
  11 -13   0    3.04    0.39 
  12 -13   0    3.22    0.37 
  13 -13   0    0.56    0.19 
  14 -13   0   17.32    1.11 
  -2 -12   0    0.27    0.20 
  -1 -12   0    1.88    0.43 
   0 -12   0    4.87    0.59 
   1 -12   0    0.06    0.28 
   2 -12   0    5.65    0.59 
   3 -12   0    6.87    0.80 
   4 -12   0   43.04    3.14 
   5 -12   0    7.25    0.62 
   6 -12   0    1.08    0.30 
   7 -12   0    2.79    0.32 
   8 -12   0   21.84    1.06 
   9 -12   0   19.63    0.99 
  10 -12   0   21.98    1.43 
  11 -12   0    1.59    0.26 
  12 -12   0    5.10    0.47 
  13 -12   0    4.47    0.43 
  14 -12   0    0.79    0.18 
  -4 -11   0    0.26    0.19 
  -3 -11   0    1.19    0.29 
  -2 -11   0    3.74    0.53 
  -1 -11   0    0.89    0.22 
   0 -11   0   19.96    1.23 
   1 -11   0    0.21    0.31 
   2 -11   0   28.24    1.95 
   3 -11   0   71.08    4.58 
   4 -11   0    2.15    0.39 
   5 -11   0    2.34    0.34 
   6 -11   0   17.15    1.05 
   7 -11   0    3.07    0.46 
   8 -11   0    0.42    0.28 
   9 -11   0    3.29    0.33 
  10 -11   0   15.28    1.14 
  11 -11   0   24.07    1.51 
  12 -11   0    0.60    0.16 
  13 -11   0    7.47    0.33 
  14 -11   0    3.82    0.25 
  15 -11   0    1.79    0.15 
  -5 -10   0    2.28    0.42 
  -4 -10   0    6.95    0.69 
  -3 -10   0    1.22    0.35 
  -2 -10   0   18.77    1.17 
  -1 -10   0   18.45    0.95 
   0 -10   0   13.05    0.95 
   1 -10   0    4.49    0.60 
   2 -10   0    5.02    0.49 
   3 -10   0   22.68    1.23 
   4 -10   0    4.22    0.43 
   5 -10   0   26.58    1.41 
   6 -10   0   59.39    3.15 
   7 -10   0   20.95    1.15 
   8 -10   0    3.40    0.49 
   9 -10   0   39.34    2.79 
  10 -10   0   16.22    0.82 
  11 -10   0    0.43    0.14 
  12 -10   0    5.18    0.30 
  13 -10   0   22.61    0.85 
  14 -10   0    0.75    0.11 
  15 -10   0    0.10    0.11 
  -6  -9   0   23.54    1.99 
  -5  -9   0   23.95    1.73 
  -4  -9   0    3.50    0.39 
  -3  -9   0   20.59    1.13 
  -2  -9   0    2.14    0.30 
  -1  -9   0   42.08    2.80 
   0  -9   0   19.14    1.12 
   1  -9   0    0.59    0.28 
   2  -9   0   31.55    1.80 
   3  -9   0   41.02    2.07 
   4  -9   0    7.33    0.48 
   5  -9   0   57.23    2.54 
   6  -9   0   24.09    1.23 
   7  -9   0    4.96    0.46 
   8  -9   0    7.56    0.67 
   9  -9   0   18.11    0.92 
  10  -9   0    5.67    0.38 
  11  -9   0   27.20    1.05 
  12  -9   0    9.66    0.43 
  13  -9   0    5.86    0.29 
  14  -9   0    1.27    0.15 
  15  -9   0    0.42    0.13 
  -7  -8   0   14.41    1.08 
  -6  -8   0    8.61    1.13 
  -5  -8   0   37.59    1.96 
  -4  -8   0   22.35    1.21 
  -3  -8   0    0.70    0.23 
  -2  -8   0    4.14    0.48 
  -1  -8   0    6.78    0.60 
   0  -8   0   70.19    3.60 
   1  -8   0  384.14   15.43 
   2  -8   0   31.96    1.40 
   3  -8   0   46.92    2.26 
   4  -8   0   44.72    1.90 
   5  -8   0   31.88    1.56 
   6  -8   0   35.56    1.84 
   7  -8   0   35.03    1.82 
   8  -8   0   74.20    3.40 
   9  -8   0    1.34    0.20 
  10  -8   0    3.70    0.44 
  11  -8   0   67.40    3.03 
  12  -8   0   46.56    1.71 
  13  -8   0    1.05    0.17 
  14  -8   0    1.03    0.14 
  15  -8   0    4.43    0.31 
  -8  -7   0    2.72    0.45 
  -7  -7   0   46.45    3.83 
  -6  -7   0    6.08    0.40 
  -5  -7   0    4.38    0.37 
  -4  -7   0    2.39    0.45 
  -3  -7   0   18.54    1.26 
  -2  -7   0    6.11    0.51 
  -1  -7   0   38.82    1.71 
   0  -7   0  135.92    5.35 
   1  -7   0  293.52   12.44 
   2  -7   0  805.97   31.51 
   3  -7   0    3.84    0.31 
   4  -7   0   22.45    1.14 
   5  -7   0   17.98    0.82 
   6  -7   0    7.49    0.45 
   7  -7   0  123.04    6.05 
   8  -7   0  399.06   14.37 
   9  -7   0   35.36    2.25 
  10  -7   0   21.26    1.42 
  11  -7   0    2.62    0.41 
  12  -7   0    6.41    0.39 
  13  -7   0    9.32    0.39 
  14  -7   0   44.65    1.66 
  15  -7   0    9.91    0.55 
  -8  -6   0    2.09    0.45 
  -7  -6   0    8.05    0.56 
  -6  -6   0    1.21    0.23 
  -5  -6   0   17.83    1.25 
  -4  -6   0   70.22    3.65 
  -3  -6   0   21.54    1.15 
  -2  -6   0   39.04    1.57 
  -1  -6   0    5.91    0.43 
   0  -6   0  255.91    9.39 
   1  -6   0  228.01    8.83 
   2  -6   0   21.18    1.54 
   3  -6   0  150.01    8.10 
   4  -6   0    8.71    0.68 
   5  -6   0   22.18    0.93 
   6  -6   0  257.07   11.63 
   7  -6   0  326.94   14.29 
   8  -6   0   30.71    1.44 
   9  -6   0   42.62    2.65 
  10  -6   0    4.82    0.43 
  11  -6   0    2.37    0.19 
  12  -6   0    0.74    0.14 
  13  -6   0    4.35    0.27 
  14  -6   0   12.64    0.48 
  15  -6   0   21.79    1.04 
  -8  -5   0    1.94    0.23 
  -7  -5   0    5.63    0.46 
  -6  -5   0    1.79    0.32 
  -5  -5   0   24.18    1.53 
  -4  -5   0   64.09    3.36 
  -3  -5   0   40.96    1.85 
  -2  -5   0   17.16    0.81 
  -1  -5   0   19.22    0.92 
   0  -5   0    6.86    0.62 
   1  -5   0   45.45    2.25 
   2  -5   0  641.23   31.64 
   3  -5   0   26.87    1.33 
   4  -5   0   17.67    1.03 
   5  -5   0    6.21    0.50 
   6  -5   0  220.63   14.25 
   7  -5   0  817.39   36.39 
   8  -5   0   55.64    2.46 
   9  -5   0    8.29    0.56 
  10  -5   0   26.92    1.70 
  11  -5   0   16.50    0.68 
  12  -5   0    3.23    0.24 
  13  -5   0   37.29    1.37 
  14  -5   0   17.94    0.89 
  15  -5   0    3.51    0.20 
  -9  -4   0    4.84    0.53 
  -8  -4   0   48.56    3.11 
  -7  -4   0    3.59    0.41 
  -6  -4   0    2.86    0.42 
  -5  -4   0    6.06    0.54 
  -4  -4   0   41.54    2.89 
  -3  -4   0   27.53    1.20 
  -2  -4   0    7.67    0.87 
  -1  -4   0   16.74    1.20 
   0  -4   0   11.84    0.72 
   1  -4   0  538.74   24.03 
   2  -4   0  515.63   26.39 
   3  -4   0  366.14   17.61 
   4  -4   0   11.80    0.68 
   5  -4   0   48.10    2.41 
   6  -4   0   26.27    1.74 
   7  -4   0    3.35    0.46 
   8  -4   0   43.87    2.04 
   9  -4   0   56.55    3.82 
  10  -4   0   60.68    4.13 
  11  -4   0    3.73    0.26 
  12  -4   0   22.10    0.84 
  13  -4   0    5.87    0.33 
  14  -4   0    5.72    0.33 
  15  -4   0    0.10    0.12 
  -9  -3   0   12.24    0.78 
  -8  -3   0   67.31    4.54 
  -7  -3   0   20.11    1.45 
  -6  -3   0   40.22    2.71 
  -5  -3   0   54.51    3.47 
  -4  -3   0    3.86    0.35 
  -3  -3   0  181.27    8.18 
  -2  -3   0   20.92    1.39 
  -1  -3   0  335.11   27.87 
   0  -3   0   46.58    2.58 
   1  -3   0   61.49    3.05 
   2  -3   0  596.04   27.75 
   3  -3   0   52.69    2.49 
   4  -3   0  546.38   26.88 
   5  -3   0  607.71   31.51 
   6  -3   0  146.19   10.30 
   7  -3   0   26.00    1.76 
   8  -3   0   35.58    1.68 
   9  -3   0   25.45    1.51 
  10  -3   0   20.77    1.36 
  11  -3   0    0.69    0.14 
  12  -3   0   21.05    0.96 
  13  -3   0    0.86    0.23 
  14  -3   0    1.71    0.28 
 -10  -2   0    6.08    0.52 
  -9  -2   0   28.16    1.90 
  -8  -2   0    3.42    0.44 
  -7  -2   0   36.09    2.30 
  -6  -2   0   25.05    1.98 
  -5  -2   0  743.73   51.76 
  -2  -2   0  567.75   26.45 
  -1  -2   0  527.00   27.80 
   0  -2   0  242.33   21.25 
   1  -2   0 1000.00   74.72 
   2  -2   0  307.36   21.18 
   3  -2   0   56.58    4.66 
   4  -2   0  510.95   26.31 
   5  -2   0   22.24    1.17 
   6  -2   0    8.08    0.63 
   7  -2   0   16.89    1.24 
   8  -2   0   36.02    1.75 
   9  -2   0    6.02    0.49 
  11  -2   0    4.15    0.49 
  12  -2   0   24.64    1.48 
  13  -2   0    2.82    0.39 
  14  -2   0    0.32    0.14 
 -10  -1   0    0.47    0.24 
  -9  -1   0    5.85    0.52 
  -7  -1   0  373.20   25.16 
  -6  -1   0  314.83   20.27 
  -5  -1   0  196.39   14.34 
  -2  -1   0   62.91    3.08 
  -1  -1   0  892.67   74.74 
   0  -1   0  105.54    9.12 
   1  -1   0  128.03    9.08 
   2  -1   0  955.30   74.70 
   3  -1   0  540.26   43.61 
   4  -1   0  344.96   17.55 
   5  -1   0   17.43    0.93 
   6  -1   0   20.45    1.44 
   7  -1   0    7.03    0.63 
   8  -1   0   35.08    2.51 
  10  -1   0   40.99    2.76 
  11  -1   0   13.85    1.17 
  13  -1   0    3.67    0.36 
  14  -1   0    0.86    0.14 
 -11   0   0   23.64    1.54 
 -10   0   0   20.17    1.20 
  -9   0   0   16.95    1.28 
  -8   0   0   78.33    4.86 
  -7   0   0  120.93    8.52 
  -6   0   0  237.49   16.49 
   1   0   0  112.46    9.06 
   2   0   0  257.74   21.13 
   3   0   0   46.60    2.45 
   4   0   0   10.68    0.61 
   5   0   0    6.18    0.42 
   6   0   0  243.80   16.31 
   7   0   0  119.06    8.46 
   8   0   0   69.32    4.86 
  10   0   0   18.82    1.21 
  11   0   0   23.83    1.56 
  12   0   0    3.99    0.45 
  13   0   0    0.55    0.15 
 -11   1   0   15.65    1.15 
 -10   1   0   41.73    2.76 
  -9   1   0    8.44    0.63 
  -8   1   0   34.79    2.45 
  -7   1   0    7.68    0.53 
  -6   1   0   20.95    1.39 
   1   1   0  959.24   74.78 
   2   1   0   54.15    2.95 
   3   1   0  553.63   26.87 
   4   1   0   48.18    2.37 
   5   1   0  220.17   10.96 
   6   1   0  318.96   20.04 
   7   1   0  363.29   24.86 
   9   1   0    6.34    0.61 
  10   1   0    0.21    0.24 
  11   1   0    0.76    0.23 
  12   1   0    4.25    0.40 
  13   1   0   16.13    1.12 
 -11   2   0    4.30    0.42 
 -10   2   0    4.44    0.44 
  -9   2   0    5.66    0.51 
  -8   2   0   34.52    2.48 
  -7   2   0   16.70    1.18 
   1   2   0  551.49   27.71 
   2   2   0  513.35   26.31 
   3   2   0  649.99   31.51 
   4   2   0   27.50    1.31 
   5   2   0  800.47   39.47 
   6   2   0   25.54    2.01 
   7   2   0   32.92    2.33 
   9   2   0   27.51    1.90 
  10   2   0    5.30    0.54 
  11   2   0    7.86    0.60 
  12   2   0    0.72    0.15 
 -11   3   0    0.56    0.25 
 -10   3   0   21.53    1.41 
  -9   3   0   24.05    1.55 
  -8   3   0   34.22    2.37 
  -7   3   0   22.88    1.69 
   1   3   0  351.73   17.55 
   2   3   0   20.29    1.17 
   3   3   0  153.96    7.95 
   4   3   0    3.48    0.30 
   5   3   0   55.82    2.68 
   6   3   0   38.82    2.73 
   7   3   0   18.81    1.49 
 -11   4   0    4.01    0.43 
 -10   4   0   61.63    4.25 
  -9   4   0   58.51    3.93 
  -8   4   0   43.28    2.88 
  -7   4   0    4.13    0.34 
   1   4   0   17.59    0.92 
   2   4   0    6.95    0.46 
   3   4   0   26.61    1.33 
   4   4   0   43.20    2.23 
   5   4   0    5.16    0.45 
   6   4   0    3.30    0.48 
 -11   5   0   18.30    1.23 
 -10   5   0   26.42    1.74 
  -9   5   0    6.92    0.54 
  -8   5   0   52.84    3.47 
  -7   5   0  779.59   51.76 
   0   5   0    8.18    0.67 
   1   5   0   20.89    1.10 
   2   5   0   17.37    0.94 
   3   5   0   37.34    1.85 
   4   5   0   61.32    3.03 
   5   5   0   23.08    1.76 
   6   5   0    1.70    0.36 
 -11   6   0    2.16    0.37 
 -10   6   0    3.76    0.41 
  -9   6   0   39.74    2.71 
  -8   6   0   28.11    1.99 
  -7   6   0  319.73   20.27 
  -6   6   0  247.59   16.49 
   0   6   0  273.86   19.87 
   1   6   0    6.17    0.44 
   2   6   0   38.15    1.94 
   3   6   0   19.38    1.57 
   4   6   0   67.48    4.26 
   8   6   0    1.43    0.33 
 -11   7   0    3.31    0.41 
 -10   7   0   20.33    1.44 
  -9   7   0   35.75    2.30 
  -8   7   0  372.13   25.16 
  -7   7   0  122.45    8.52 
  -1   7   0  300.96   24.40 
   0   7   0  142.93    6.55 
   1   7   0   38.06    1.93 
   2   7   0    6.35    0.58 
   3   7   0   18.54    1.45 
   8   7   0    3.05    0.47 
 -15   8   0    4.24    0.27 
 -10   8   0    4.03    0.46 
  -9   8   0    2.32    0.36 
  -8   8   0   77.88    4.87 
  -7   8   0   35.20    2.47 
  -2   8   0   33.43    2.51 
  -1   8   0  392.15   19.23 
   0   8   0   71.71    4.86 
   2   8   0    3.67    0.50 
   7   8   0   13.05    1.10 
 -10   9   0    5.75    0.54 
  -9   9   0   17.91    1.30 
  -8   9   0    8.10    0.66 
  -7   9   0    5.33    0.54 
  -1   9   0    0.99    0.33 
   0   9   0   19.00    1.37 
   6   9   0   24.31    2.01 
 -10  10   0   17.70    1.19 
  -9  10   0   40.29    2.76 
  -8  10   0    3.98    0.48 
  -7  10   0   21.29    1.43 
  -2  10   0    4.20    0.55 
   5  10   0    2.79    0.50 
 -10  11   0   14.82    1.16 
  -9  11   0    3.70    0.43 
  -8  11   0    0.51    0.26 
   4  11   0   -0.11    0.22 
  -9  12   0   18.20    1.41 
  -8  12   0   18.91    1.51 
  -7  12   0    2.68    0.44 
   2  12   0    0.05    0.24 
  -8  13   0   33.65    2.48 
  -7  13   0    4.32    0.48 
   1  13   0    0.74    0.19 
   9 -15   1    0.48    0.18 
  10 -15   1    3.72    0.38 
  11 -15   1    1.34    0.20 
   8 -14   1   18.61    1.26 
   9 -14   1   13.68    0.92 
  10 -14   1    0.97    0.22 
  11 -14   1    0.74    0.19 
  12 -14   1    0.38    0.18 
  13 -14   1    1.73    0.26 
  -1 -13   1    2.26    0.31 
   4 -13   1    4.09    0.52 
   5 -13   1    7.88    0.72 
   6 -13   1    0.49    0.28 
   7 -13   1    8.19    0.47 
   8 -13   1    1.23    0.20 
   9 -13   1   16.65    1.16 
  10 -13   1   16.16    1.11 
  11 -13   1    2.78    0.38 
  12 -13   1    1.88    0.32 
  13 -13   1    2.96    0.33 
  -2 -12   1    0.03    0.19 
  -1 -12   1    1.80    0.40 
   1 -12   1    7.84    0.76 
   2 -12   1    3.66    0.51 
   3 -12   1   21.09    1.61 
   4 -12   1    6.93    0.64 
   5 -12   1    5.72    0.61 
   6 -12   1    0.22    0.18 
   7 -12   1    7.23    0.43 
   8 -12   1    0.75    0.19 
   9 -12   1    0.67    0.19 
  10 -12   1    6.47    0.43 
  11 -12   1   20.53    1.35 
  12 -12   1    3.50    0.43 
  13 -12   1    1.36    0.23 
  14 -12   1    8.26    0.61 
  -4 -11   1    1.63    0.31 
  -3 -11   1    0.91    0.27 
  -1 -11   1   18.72    1.10 
   0 -11   1    2.52    0.28 
   1 -11   1    0.08    0.31 
   2 -11   1    1.20    0.36 
   3 -11   1    3.90    0.55 
   4 -11   1   12.20    0.92 
   5 -11   1    1.07    0.30 
   6 -11   1    1.64    0.31 
   7 -11   1   27.47    1.90 
   8 -11   1    6.91    0.64 
   9 -11   1   10.76    0.60 
  10 -11   1   14.15    0.72 
  11 -11   1    2.95    0.43 
  12 -11   1    9.46    0.50 
  13 -11   1    0.14    0.11 
  14 -11   1    2.56    0.21 
  15 -11   1    1.32    0.18 
  -5 -10   1    5.21    0.49 
  -4 -10   1    0.62    0.28 
  -3 -10   1   14.39    1.46 
  -2 -10   1    7.42    0.49 
  -1 -10   1   10.64    0.80 
   0 -10   1   15.30    0.92 
   1 -10   1    2.58    0.42 
   2 -10   1   11.34    0.78 
   3 -10   1    3.32    0.45 
   4 -10   1   15.51    0.93 
   5 -10   1    7.71    0.65 
   6 -10   1   22.40    1.19 
   7 -10   1    6.85    0.55 
   8 -10   1   -0.11    0.25 
   9 -10   1    1.56    0.35 
  10 -10   1   15.91    0.78 
  11 -10   1    0.36    0.17 
  12 -10   1    4.28    0.26 
  13 -10   1    0.32    0.12 
  14 -10   1    1.63    0.18 
  15 -10   1    0.37    0.12 
  -6  -9   1    1.08    0.25 
  -5  -9   1   11.77    1.22 
  -4  -9   1   17.54    0.95 
  -3  -9   1    1.69    0.24 
  -2  -9   1   10.33    0.68 
  -1  -9   1    1.03    0.34 
   0  -9   1    3.82    0.48 
   1  -9   1   35.62    1.93 
   2  -9   1   39.54    1.93 
   3  -9   1    3.50    0.43 
   4  -9   1   75.28    3.21 
   5  -9   1   18.12    0.88 
   6  -9   1   13.03    0.86 
   7  -9   1    4.26    0.41 
   8  -9   1   22.46    1.27 
   9  -9   1    4.62    0.36 
  10  -9   1    2.49    0.24 
  11  -9   1    1.32    0.16 
  12  -9   1   23.17    0.87 
  13  -9   1    4.83    0.27 
  14  -9   1    0.77    0.13 
  15  -9   1    1.54    0.20 
  -7  -8   1   11.80    1.18 
  -6  -8   1   22.13    1.68 
  -5  -8   1    2.38    0.29 
  -4  -8   1    1.19    0.23 
  -3  -8   1    5.96    0.49 
  -2  -8   1    0.13    0.27 
  -1  -8   1   23.67    1.34 
   0  -8   1   22.63    1.20 
   1  -8   1    5.20    0.48 
   2  -8   1  145.03    6.12 
   3  -8   1   97.49    3.81 
   4  -8   1    1.45    0.26 
   5  -8   1   20.06    0.97 
   6  -8   1   10.53    0.59 
   7  -8   1    5.86    0.43 
   8  -8   1   20.05    0.87 
   9  -8   1   37.00    1.73 
  10  -8   1   10.56    0.80 
  11  -8   1    3.84    0.34 
  12  -8   1    6.39    0.32 
  13  -8   1    7.89    0.44 
  14  -8   1    8.12    0.40 
  15  -8   1   10.82    0.71 
  -8  -7   1   12.04    1.01 
  -7  -7   1    1.28    0.33 
  -6  -7   1    7.54    0.52 
  -5  -7   1    6.10    0.48 
  -4  -7   1   28.32    1.49 
  -3  -7   1    7.92    0.63 
  -2  -7   1    4.25    0.42 
  -1  -7   1    4.54    0.44 
   0  -7   1  141.78    5.94 
   1  -7   1  108.08    5.75 
   2  -7   1    2.63    0.29 
   3  -7   1   98.89    4.11 
   4  -7   1   69.41    2.79 
   5  -7   1    0.68    0.16 
   6  -7   1   26.92    1.22 
   7  -7   1  151.69    6.76 
   8  -7   1    7.03    0.37 
   9  -7   1   40.10    2.42 
  10  -7   1    3.36    0.44 
  11  -7   1   11.19    0.59 
  12  -7   1    5.97    0.38 
  13  -7   1    0.66    0.15 
  14  -7   1    1.88    0.17 
  15  -7   1   14.61    0.62 
  -8  -6   1    6.95    0.79 
  -7  -6   1    0.96    0.21 
  -6  -6   1    0.05    0.20 
  -5  -6   1    2.26    0.37 
  -4  -6   1   20.29    1.30 
  -3  -6   1   17.23    0.86 
  -2  -6   1   10.25    0.59 
  -1  -6   1   27.18    1.20 
   0  -6   1    4.87    0.40 
   1  -6   1   31.23    1.45 
   2  -6   1  163.25    8.24 
   3  -6   1   36.00    1.87 
   4  -6   1   21.08    1.32 
   5  -6   1    2.52    0.23 
   6  -6   1    6.79    0.38 
   7  -6   1  110.14    5.05 
   8  -6   1  157.53    6.87 
   9  -6   1    3.94    0.45 
  10  -6   1   16.51    1.06 
  11  -6   1    0.86    0.15 
  12  -6   1    0.27    0.14 
  13  -6   1    7.88    0.36 
  14  -6   1   17.60    0.71 
  15  -6   1    0.78    0.10 
  -8  -5   1    8.18    0.53 
  -7  -5   1    6.68    0.47 
  -6  -5   1    1.25    0.28 
  -5  -5   1   11.25    0.71 
  -4  -5   1   15.65    1.18 
  -3  -5   1   21.26    1.02 
  -2  -5   1    0.83    0.19 
  -1  -5   1    1.97    0.25 
   0  -5   1   21.51    1.24 
   1  -5   1    4.70    0.43 
   2  -5   1   34.92    2.14 
   3  -5   1  157.31    7.36 
   4  -5   1    2.74    0.34 
   5  -5   1   24.45    1.25 
   6  -5   1   34.36    1.37 
   7  -5   1    4.11    0.33 
   8  -5   1   96.06    4.20 
   9  -5   1   75.12    4.85 
  10  -5   1    8.93    0.73 
  11  -5   1    1.66    0.17 
  12  -5   1    6.73    0.34 
  13  -5   1    1.35    0.14 
  14  -5   1   13.11    0.51 
  15  -5   1    3.50    0.23 
  -8  -4   1    5.24    0.56 
  -7  -4   1   10.46    0.86 
  -6  -4   1   14.21    1.07 
  -5  -4   1   78.47    4.99 
  -4  -4   1    3.08    0.33 
  -3  -4   1   66.64    2.82 
  -2  -4   1   22.35    1.46 
  -1  -4   1    1.26    0.47 
   0  -4   1   29.10    1.64 
   1  -4   1   56.16    2.88 
   2  -4   1   28.08    1.38 
   3  -4   1   12.88    0.75 
   4  -4   1   28.27    1.49 
   5  -4   1    3.72    0.34 
   6  -4   1  162.29    8.08 
   7  -4   1  104.25    6.57 
   8  -4   1    3.51    0.26 
   9  -4   1   19.28    1.15 
  10  -4   1   19.98    1.41 
  11  -4   1   27.04    1.05 
  12  -4   1    1.02    0.14 
  13  -4   1   16.36    0.80 
  14  -4   1    1.14    0.13 
  15  -4   1    1.26    0.20 
  -9  -3   1   21.80    1.56 
  -8  -3   1    5.33    0.49 
  -7  -3   1    4.77    0.43 
  -6  -3   1    6.06    0.44 
  -5  -3   1   83.53    5.99 
  -4  -3   1   98.00    6.57 
  -3  -3   1   32.74    1.91 
  -2  -3   1  136.84    7.40 
  -1  -3   1   11.76    0.88 
   0  -3   1    6.38    0.61 
   1  -3   1   55.62    2.74 
   2  -3   1    3.47    0.33 
   3  -3   1    8.02    0.45 
   4  -3   1   57.77    2.77 
   5  -3   1   38.73    2.03 
   6  -3   1   31.16    1.69 
   7  -3   1   66.61    4.42 
   8  -3   1   19.39    0.99 
   9  -3   1   13.23    1.02 
  10  -3   1    6.06    0.56 
  11  -3   1    6.81    0.34 
  12  -3   1    1.05    0.18 
  13  -3   1   16.73    1.14 
  14  -3   1    0.58    0.17 
 -10  -2   1    3.92    0.43 
  -9  -2   1    1.26    0.26 
  -8  -2   1    9.99    0.80 
  -7  -2   1   33.84    2.46 
  -6  -2   1  150.66    9.83 
  -5  -2   1    4.09    0.34 
  -3  -2   1   47.76    2.23 
  -2  -2   1   22.22    1.42 
  -1  -2   1    3.72    0.47 
   0  -2   1  284.29   22.82 
   1  -2   1    2.56    0.37 
   2  -2   1  325.35   22.75 
   3  -2   1   52.16    2.65 
   4  -2   1   23.15    1.26 
   5  -2   1  139.34    7.25 
   6  -2   1   21.09    1.17 
   7  -2   1    0.71    0.28 
   8  -2   1   10.84    0.56 
   9  -2   1    3.67    0.39 
  11  -2   1   10.95    0.87 
  12  -2   1    5.70    0.61 
  13  -2   1    2.80    0.38 
  14  -2   1    0.42    0.15 
 -10  -1   1    0.52    0.24 
  -9  -1   1    2.04    0.36 
  -8  -1   1   39.00    2.46 
  -7  -1   1    8.13    0.53 
  -6  -1   1   97.56    7.10 
  -5  -1   1   31.34    2.16 
  -2  -1   1   52.94    2.77 
  -1  -1   1    1.49    0.37 
   0  -1   1  619.77   46.57 
   1  -1   1  649.34   46.54 
   2  -1   1    2.03    0.20 
   3  -1   1    3.35    0.23 
   4  -1   1   11.89    0.66 
   5  -1   1    2.40    0.22 
   6  -1   1    2.17    0.25 
   7  -1   1   26.48    1.91 
   8  -1   1    4.65    0.58 
  10  -1   1    3.18    0.47 
  11  -1   1   16.11    1.04 
  12  -1   1   21.35    1.39 
  13  -1   1    1.78    0.30 
  14  -1   1    1.78    0.23 
 -10   0   1   16.47    1.12 
  -9   0   1    5.53    0.48 
  -8   0   1   18.30    1.42 
  -7   0   1  145.76    9.51 
  -6   0   1    7.05    0.47 
  -1   0   1  597.17   46.55 
   0   0   1    0.02    0.02 
   1   0   1  578.39   46.58 
   2   0   1  281.14   22.71 
   3   0   1    7.57    0.41 
   4   0   1   27.52    1.44 
   5   0   1   22.16    1.17 
   6   0   1    6.32    0.42 
   7   0   1  139.10    9.44 
   8   0   1   18.63    1.49 
  10   0   1   14.67    1.14 
  11   0   1    1.48    0.30 
  12   0   1    4.62    0.43 
  13   0   1    2.75    0.30 
 -10   1   1    2.52    0.36 
  -9   1   1   22.85    1.61 
  -8   1   1    5.94    0.46 
  -7   1   1   25.50    1.85 
   0   1   1  577.30   46.60 
   1   1   1    1.53    0.20 
   2   1   1   50.48    2.65 
   3   1   1   54.62    2.75 
   4   1   1    4.12    0.29 
   5   1   1   35.08    1.70 
   6   1   1  109.20    7.07 
   7   1   1    7.09    0.64 
   8   1   1   32.56    2.49 
   9   1   1    2.19    0.36 
  10   1   1    0.42    0.24 
  11   1   1    9.24    0.72 
  12   1   1    1.07    0.20 
  13   1   1    0.65    0.12 
 -10   2   1    0.07    0.22 
  -9   2   1    3.89    0.41 
  -8   2   1   10.53    0.76 
  -7   2   1    0.88    0.18 
   1   2   1    3.41    0.37 
   2   2   1   24.15    1.26 
   3   2   1   42.30    2.02 
   4   2   1  166.36    8.05 
   5   2   1    3.71    0.30 
   6   2   1  160.01    9.76 
   7   2   1   33.72    2.50 
   8   2   1    9.26    0.86 
   9   2   1    0.93    0.29 
  10   2   1    4.06    0.46 
  11   2   1    0.35    0.19 
  12   2   1    8.22    0.60 
 -10   3   1    6.40    0.59 
  -9   3   1   13.68    1.04 
  -8   3   1   18.80    1.37 
  -7   3   1   64.83    4.40 
   0   3   1    7.30    0.64 
   1   3   1   13.00    0.67 
   2   3   1  136.73    7.25 
   3   3   1   29.88    1.66 
   4   3   1  107.10    5.04 
   5   3   1   86.40    4.60 
   6   3   1    5.49    0.55 
   7   3   1    3.67    0.51 
   9   3   1   22.32    1.56 
 -10   4   1   21.93    1.46 
  -9   4   1   18.52    1.17 
  -8   4   1    2.87    0.31 
  -7   4   1   94.59    6.56 
   0   4   1   32.35    2.29 
   1   4   1    1.87    0.20 
   2   4   1   22.93    1.17 
   3   4   1   65.27    3.39 
   4   4   1    2.76    0.29 
   5   4   1   76.43    3.84 
   6   4   1   13.96    1.11 
 -10   5   1    9.25    0.73 
  -9   5   1   77.96    4.98 
  -8   5   1   92.02    5.99 
  -7   5   1    3.74    0.33 
   0   5   1   23.20    1.84 
   1   5   1    2.10    0.24 
   2   5   1    0.61    0.16 
   3   5   1   20.86    1.09 
   4   5   1   14.61    0.92 
   5   5   1   10.06    0.80 
 -14   6   1   17.54    1.11 
 -10   6   1   15.22    1.06 
  -8   6   1  152.98    9.83 
  -7   6   1  105.07    7.10 
  -6   6   1    7.32    0.49 
  -1   6   1   31.59    2.67 
   0   6   1    4.74    0.40 
   1   6   1   30.06    1.47 
   2   6   1    9.94    0.62 
   3   6   1   15.76    1.11 
   4   6   1   19.67    1.49 
 -10   7   1    4.49    0.46 
  -9   7   1   36.40    2.46 
  -8   7   1    8.33    0.55 
  -7   7   1  148.39    9.52 
  -2   7   1    2.39    0.46 
  -1   7   1  116.36    8.62 
   0   7   1  146.35    7.30 
   1   7   1    4.56    0.40 
   2   7   1    3.74    0.47 
   3   7   1    7.61    0.65 
   8   7   1   11.20    1.02 
 -15   8   1   10.90    0.67 
  -9   8   1   38.77    2.46 
  -8   8   1   19.54    1.43 
  -7   8   1    5.82    0.50 
  -2   8   1  146.64   11.89 
  -1   8   1    4.35    0.59 
   0   8   1   23.29    1.50 
   1   8   1   24.50    1.69 
   2   8   1    0.27    0.27 
   7   8   1   12.52    1.21 
  -9   9   1    4.83    0.50 
  -8   9   1   23.84    1.64 
  -7   9   1    4.28    0.46 
  -4   9   1   73.56    6.08 
  -2   9   1   38.65    2.53 
  -1   9   1   35.45    2.51 
   0   9   1    3.95    0.55 
   6   9   1    0.87    0.29 
  -9  10   1    2.07    0.37 
  -8  10   1    0.25    0.25 
  -7  10   1    5.91    0.61 
  -3  10   1    3.13    0.52 
  -2  10   1   10.85    0.90 
   5  10   1    4.14    0.57 
  -9  11   1   11.54    0.86 
  -8  11   1    6.88    0.60 
   4  11   1    1.27    0.28 
  -8  12   1    0.71    0.26 
  -7  12   1    6.27    0.60 
  -7  13   1    7.55    0.65 
   1  13   1    2.22    0.34 
   9 -15   2    1.45    0.21 
  10 -15   2    0.98    0.19 
  11 -15   2    0.72    0.16 
   8 -14   2    0.11    0.20 
   9 -14   2    2.42    0.35 
  10 -14   2    2.05    0.33 
  11 -14   2    4.41    0.39 
  12 -14   2    0.35    0.17 
  13 -14   2    0.56    0.15 
   4 -13   2    0.25    0.27 
   5 -13   2    0.37    0.31 
   6 -13   2    0.17    0.28 
   7 -13   2    0.05    0.18 
   8 -13   2    0.47    0.18 
   9 -13   2    0.44    0.22 
  10 -13   2    4.48    0.45 
  11 -13   2   17.43    1.15 
  12 -13   2    0.59    0.20 
  13 -13   2    1.37    0.21 
  14 -13   2    0.19    0.14 
  -2 -12   2    0.73    0.21 
  -1 -12   2    0.18    0.23 
   1 -12   2    2.98    0.44 
   2 -12   2    3.97    0.56 
   3 -12   2    0.22    0.30 
   4 -12   2    0.26    0.30 
   5 -12   2    0.29    0.29 
   6 -12   2    2.01    0.23 
   7 -12   2    1.81    0.22 
   8 -12   2    2.93    0.31 
   9 -12   2    2.55    0.28 
  10 -12   2    2.09    0.26 
  11 -12   2    4.17    0.47 
  12 -12   2    8.93    0.69 
  13 -12   2    2.06    0.32 
  14 -12   2    1.06    0.19 
  -4 -11   2    0.27    0.19 
  -3 -11   2    3.25    0.49 
  -2 -11   2   15.48    1.51 
  -1 -11   2    4.74    0.40 
   0 -11   2    1.69    0.38 
   1 -11   2   14.94    1.19 
   2 -11   2    3.06    0.45 
   3 -11   2    2.64    0.48 
   4 -11   2    0.53    0.31 
   5 -11   2    0.87    0.30 
   6 -11   2    3.50    0.48 
   7 -11   2    1.61    0.33 
   8 -11   2    9.96    0.84 
   9 -11   2   11.59    0.65 
  10 -11   2   12.69    0.67 
  11 -11   2    2.60    0.42 
  12 -11   2    3.10    0.39 
  13 -11   2    2.44    0.19 
  14 -11   2    0.06    0.11 
  15 -11   2    2.02    0.21 
  -5 -10   2    1.15    0.24 
  -4 -10   2    2.26    0.45 
  -3 -10   2    5.01    0.63 
  -2 -10   2    1.13    0.24 
  -1 -10   2   11.87    0.76 
   0 -10   2    5.41    0.45 
   1 -10   2    0.34    0.32 
   2 -10   2   18.41    1.16 
   3 -10   2    7.77    0.61 
   4 -10   2   15.34    1.02 
   5 -10   2   38.27    1.93 
   6 -10   2    6.22    0.48 
   7 -10   2    6.70    0.54 
   8 -10   2    7.62    0.60 
   9 -10   2    0.81    0.32 
  10 -10   2    4.39    0.50 
  11 -10   2   15.26    0.79 
  12 -10   2    5.10    0.29 
  13 -10   2    0.69    0.12 
  14 -10   2    2.18    0.22 
  15 -10   2    0.92    0.15 
  -6  -9   2    1.59    0.28 
  -5  -9   2    1.58    0.35 
  -4  -9   2    0.23    0.19 
  -3  -9   2    1.99    0.27 
  -2  -9   2   13.15    0.75 
  -1  -9   2    0.23    0.32 
   0  -9   2    3.33    0.46 
   1  -9   2   12.08    0.82 
   2  -9   2    0.61    0.26 
   3  -9   2   82.97    3.97 
   4  -9   2   10.50    0.63 
   5  -9   2    2.65    0.33 
   6  -9   2   18.10    0.92 
   7  -9   2   13.88    0.83 
   8  -9   2    0.91    0.28 
   9  -9   2    3.83    0.32 
  10  -9   2    0.71    0.25 
  11  -9   2    2.80    0.24 
  12  -9   2    0.18    0.13 
  13  -9   2    0.44    0.13 
  14  -9   2    4.17    0.26 
  15  -9   2   11.22    0.71 
  -7  -8   2    1.24    0.25 
  -6  -8   2   -0.17    0.27 
  -5  -8   2    0.57    0.19 
  -4  -8   2    2.47    0.31 
  -3  -8   2   11.38    0.66 
  -2  -8   2    7.69    0.61 
  -1  -8   2    1.36    0.28 
   0  -8   2   18.23    1.10 
   1  -8   2    2.62    0.36 
   2  -8   2    4.53    0.37 
   3  -8   2   14.80    0.83 
   4  -8   2  182.24    7.34 
   5  -8   2   52.91    2.17 
   6  -8   2   22.05    0.97 
   7  -8   2   11.92    0.73 
   8  -8   2   18.46    0.81 
   9  -8   2   11.24    0.58 
  10  -8   2   19.50    1.34 
  11  -8   2    2.82    0.31 
  12  -8   2    0.08    0.16 
  13  -8   2    0.63    0.15 
  14  -8   2    1.80    0.21 
  15  -8   2    2.53    0.24 
  -7  -7   2    0.63    0.29 
  -6  -7   2    0.05    0.18 
  -5  -7   2    2.00    0.25 
  -4  -7   2    1.24    0.24 
  -3  -7   2    7.09    0.61 
  -2  -7   2   13.16    0.86 
  -1  -7   2   13.23    0.74 
   0  -7   2   23.84    1.24 
   1  -7   2    1.40    0.22 
   2  -7   2    4.24    0.35 
   3  -7   2  103.99    3.98 
   4  -7   2    1.95    0.24 
   5  -7   2   74.39    3.05 
   6  -7   2   36.39    1.54 
   7  -7   2   27.99    1.32 
   8  -7   2    3.21    0.26 
   9  -7   2    0.39    0.20 
  10  -7   2    7.93    0.64 
  11  -7   2    0.52    0.18 
  12  -7   2    0.32    0.16 
  13  -7   2    0.37    0.15 
  14  -7   2    1.11    0.14 
  15  -7   2    0.51    0.14 
  -8  -6   2    2.74    0.46 
  -7  -6   2    0.05    0.18 
  -6  -6   2    1.50    0.24 
  -5  -6   2    3.60    0.35 
  -4  -6   2    4.41    0.47 
  -3  -6   2   18.88    0.98 
  -2  -6   2   17.71    0.93 
  -1  -6   2   33.75    1.61 
   0  -6   2    6.59    0.44 
   1  -6   2   14.80    0.79 
   2  -6   2    1.87    0.48 
   3  -6   2  117.26    5.93 
   4  -6   2   12.10    0.76 
   5  -6   2   91.17    3.57 
   6  -6   2    6.45    0.39 
   7  -6   2    1.40    0.23 
   8  -6   2    4.16    0.33 
   9  -6   2   83.41    3.81 
  10  -6   2   16.83    1.19 
  11  -6   2    0.41    0.17 
  12  -6   2    1.93    0.18 
  13  -6   2    0.17    0.12 
  14  -6   2   -0.02    0.10 
  15  -6   2    1.22    0.13 
  -8  -5   2    0.74    0.20 
  -7  -5   2    0.27    0.20 
  -6  -5   2    0.79    0.26 
  -5  -5   2   36.46    2.50 
  -4  -5   2    3.83    0.39 
  -3  -5   2   50.62    2.21 
  -2  -5   2   71.91    3.10 
  -1  -5   2   85.47    3.63 
   0  -5   2    5.42    0.55 
   1  -5   2   37.66    2.14 
   2  -5   2    6.48    0.65 
   3  -5   2  188.08    9.12 
   4  -5   2   39.20    1.84 
   5  -5   2    5.41    0.46 
   6  -5   2   16.27    0.72 
   7  -5   2    5.36    0.37 
   8  -5   2   16.17    0.82 
   9  -5   2    9.93    0.55 
  10  -5   2   39.07    2.43 
  11  -5   2    2.91    0.25 
  12  -5   2    1.64    0.16 
  13  -5   2    0.45    0.12 
  14  -5   2    1.83    0.15 
  15  -5   2    0.96    0.11 
  -8  -4   2    0.36    0.24 
  -7  -4   2    0.68    0.21 
  -6  -4   2   18.64    1.21 
  -5  -4   2    7.61    0.68 
  -4  -4   2  181.92   11.89 
  -3  -4   2    2.49    0.26 
  -2  -4   2    7.88    0.89 
  -1  -4   2   30.81    1.94 
   0  -4   2  213.13   10.75 
   1  -4   2  253.43   12.31 
   2  -4   2   29.50    1.44 
   3  -4   2  314.81   14.83 
   4  -4   2  232.65   10.65 
   5  -4   2   41.85    2.00 
   6  -4   2    2.35    0.29 
   7  -4   2   96.77    6.36 
   8  -4   2  190.78    8.27 
   9  -4   2    3.16    0.31 
  10  -4   2    6.14    0.50 
  11  -4   2    1.77    0.17 
  12  -4   2    2.73    0.21 
  13  -4   2    0.36    0.11 
  14  -4   2    1.63    0.16 
  15  -4   2    0.46    0.13 
  -9  -3   2    0.27    0.22 
  -8  -3   2    3.48    0.40 
  -7  -3   2    7.73    0.62 
  -6  -3   2   81.26    5.41 
  -5  -3   2   17.35    1.10 
  -4  -3   2   90.27    6.35 
  -3  -3   2  120.22    5.98 
  -2  -3   2  164.79    9.16 
  -1  -3   2  284.20   14.90 
   0  -3   2  136.55    6.69 
   1  -3   2  415.93   19.83 
   2  -3   2  722.04   34.05 
   3  -3   2  140.88    6.61 
   4  -3   2  255.34   12.22 
   5  -3   2    8.77    0.51 
   6  -3   2  117.01    5.80 
   7  -3   2    2.55    0.40 
   8  -3   2   51.68    2.37 
   9  -3   2   18.66    0.93 
  10  -3   2    6.03    0.55 
  11  -3   2    9.66    0.45 
  12  -3   2    2.46    0.27 
  13  -3   2    3.65    0.46 
  14  -3   2    4.39    0.38 
  -9  -2   2    2.64    0.39 
  -8  -2   2   21.85    1.36 
  -7  -2   2    0.69    0.21 
  -6  -2   2    2.66    0.35 
  -5  -2   2    4.50    0.39 
  -3  -2   2    9.44    0.75 
  -2  -2   2   23.14    1.48 
  -1  -2   2  625.14   34.09 
   0  -2   2    1.12    0.42 
   1  -2   2  231.84   15.98 
   2  -2   2    1.18    0.24 
   3  -2   2  405.04   19.77 
   4  -2   2   26.23    2.10 
   5  -2   2  177.52    9.03 
   6  -2   2    9.55    0.58 
   7  -2   2   75.86    4.89 
   8  -2   2   22.37    0.99 
   9  -2   2   14.02    0.73 
  10  -2   2    7.67    0.60 
  11  -2   2   11.18    0.93 
  12  -2   2    3.07    0.42 
  13  -2   2   17.32    1.18 
  14  -2   2    0.47    0.15 
  -9  -1   2    0.49    0.23 
  -8  -1   2   12.09    0.89 
  -7  -1   2    3.72    0.33 
  -6  -1   2    1.21    0.22 
  -2  -1   2  369.38   31.25 
  -1  -1   2  179.66   15.99 
   0  -1   2    3.79    0.38 
   1  -1   2    3.90    0.32 
   2  -1   2  212.38   15.92 
   3  -1   2  683.47   34.01 
   4  -1   2  300.04   14.78 
   5  -1   2   34.49    1.75 
   6  -1   2   88.35    4.45 
   7  -1   2   36.00    2.44 
   8  -1   2   11.07    0.65 
   9  -1   2    1.33    0.38 
  10  -1   2    0.66    0.29 
  11  -1   2   12.04    0.95 
  12  -1   2    4.18    0.49 
  13  -1   2    1.02    0.20 
  14  -1   2    0.53    0.12 
  -9   0   2    3.20    0.39 
  -8   0   2   18.71    1.31 
  -7   0   2   28.47    1.75 
  -6   0   2    6.30    0.50 
  -1   0   2    3.28    0.35 
   0   0   2   15.39    1.22 
   1   0   2    3.43    0.30 
   2   0   2    1.03    0.20 
   3   0   2  136.39    6.58 
   4   0   2  212.91   10.61 
   5   0   2    5.12    0.38 
   6   0   2    6.88    0.46 
   7   0   2   27.17    1.82 
   8   0   2   17.71    1.40 
   9   0   2    3.21    0.51 
  10   0   2    4.32    0.56 
  11   0   2    3.41    0.44 
  12   0   2    9.02    0.71 
  13   0   2    1.44    0.24 
  -9   1   2    1.13    0.24 
  -8   1   2   11.49    0.89 
  -7   1   2   35.63    2.38 
   0   1   2    3.59    0.31 
   1   1   2  213.20   15.92 
   2   1   2  395.46   19.77 
   3   1   2  249.64   12.21 
   4   1   2   40.46    1.96 
   5   1   2   17.03    0.87 
   6   1   2    1.41    0.23 
   7   1   2    2.98    0.47 
   8   1   2   11.54    0.97 
   9   1   2    0.44    0.26 
  10   1   2   15.91    1.16 
  11   1   2    2.37    0.40 
  12   1   2    2.40    0.31 
  13   1   2    0.31    0.11 
  -9   2   2   13.35    0.99 
  -8   2   2   23.92    1.39 
  -7   2   2   75.00    4.87 
   0   2   2    0.94    0.19 
   1   2   2  708.32   34.06 
   2   2   2   26.10    1.33 
   3   2   2    8.74    0.49 
   4   2   2    2.64    0.26 
   5   2   2    4.87    0.36 
   6   2   2    3.55    0.35 
   7   2   2    0.52    0.30 
   8   2   2   17.92    1.41 
   9   2   2    2.10    0.36 
  10   2   2    5.95    0.53 
  11   2   2    2.29    0.34 
  12   2   2    1.33    0.22 
  -9   3   2   18.43    1.27 
  -8   3   2   54.62    3.36 
  -7   3   2    2.36    0.26 
   0   3   2  138.50   10.37 
   1   3   2  317.19   14.79 
   2   3   2  188.80    9.03 
   3   3   2  121.29    5.78 
   4   3   2   99.55    4.88 
   5   3   2   17.70    0.89 
   6   3   2   82.92    5.40 
   7   3   2    7.22    0.71 
   8   3   2    3.64    0.47 
   9   3   2    0.56    0.25 
  10   3   2    0.96    0.22 
  -9   4   2    3.06    0.38 
  -8   4   2  187.85   11.88 
  -7   4   2   95.32    6.35 
   0   4   2  227.61   16.72 
   1   4   2   34.05    1.75 
   2   4   2    9.30    0.56 
   3   4   2    2.27    0.25 
   4   4   2  186.52    9.10 
   5   4   2    7.53    0.56 
   6   4   2   18.52    1.27 
  -8   5   2   15.09    1.08 
  -7   5   2    4.25    0.38 
  -1   5   2   36.56    3.08 
   0   5   2    6.35    0.37 
   1   5   2   91.41    4.44 
   2   5   2   77.78    3.76 
   3   5   2   49.86    2.60 
   4   5   2    4.27    0.44 
   5   5   2   35.45    2.52 
 -14   6   2   -0.02    0.12 
  -8   6   2    3.41    0.36 
  -7   6   2    1.13    0.20 
  -6   6   2    6.34    0.51 
  -1   6   2   15.22    1.36 
   0   6   2    6.97    0.44 
   1   6   2   36.91    1.87 
   2   6   2   18.82    1.09 
   3   6   2   18.34    1.31 
   4   6   2    3.83    0.53 
  -8   7   2    3.22    0.35 
  -7   7   2   27.59    1.76 
  -2   7   2    4.48    0.56 
  -1   7   2    1.28    0.21 
   0   7   2   24.23    1.38 
   1   7   2   13.27    0.75 
   2   7   2   13.58    1.05 
   3   7   2    6.79    0.63 
   8   7   2    1.65    0.38 
 -15   8   2    2.29    0.20 
  -8   8   2   20.43    1.32 
  -7   8   2   11.10    0.89 
  -3   8   2   14.20    1.39 
  -2   8   2    4.12    0.55 
  -1   8   2    2.05    0.30 
   0   8   2   19.09    1.39 
   1   8   2    1.33    0.33 
   2   8   2    7.38    0.72 
   7   8   2    0.95    0.27 
  -8   9   2    0.88    0.27 
  -7   9   2   14.20    1.01 
  -2   9   2    0.11    0.27 
  -1   9   2   13.22    0.99 
   0   9   2    3.81    0.51 
  -8  10   2    7.89    0.65 
  -7  10   2    6.14    0.59 
  -3  10   2    7.36    0.74 
  -2  10   2   16.86    1.42 
  -7  11   2    1.32    0.30 
   4  11   2    0.11    0.23 
  -7  12   2    1.29    0.30 
   1  13   2    0.38    0.19 
   8 -15   3   -0.21    0.16 
   9 -15   3    2.95    0.33 
  10 -15   3   11.76    0.74 
  11 -15   3    0.08    0.15 
   7 -14   3    2.23    0.36 
   8 -14   3    5.29    0.48 
   9 -14   3   10.51    0.71 
  10 -14   3    0.09    0.19 
  11 -14   3    0.80    0.20 
  12 -14   3    5.32    0.42 
  13 -14   3    1.22    0.19 
   4 -13   3   -0.02    0.30 
   5 -13   3    7.46    0.78 
   6 -13   3    3.79    0.32 
   7 -13   3    3.65    0.33 
   8 -13   3    0.05    0.18 
   9 -13   3    5.77    0.52 
  10 -13   3    0.59    0.22 
  11 -13   3    3.25    0.40 
  12 -13   3   13.15    0.89 
  13 -13   3    0.94    0.19 
  14 -13   3    0.45    0.14 
  -2 -12   3    4.52    0.53 
  -1 -12   3   12.51    1.17 
   1 -12   3    2.63    0.45 
   2 -12   3    6.81    0.70 
   3 -12   3    3.92    0.55 
   4 -12   3    3.99    0.55 
   5 -12   3    1.82    0.36 
   6 -12   3   11.53    0.64 
   7 -12   3    0.51    0.19 
   8 -12   3    0.34    0.18 
   9 -12   3    2.33    0.24 
  10 -12   3   19.40    0.99 
  11 -12   3    3.75    0.42 
  12 -12   3    9.60    0.74 
  13 -12   3    3.24    0.36 
  14 -12   3    2.10    0.28 
  -4 -11   3    0.17    0.18 
  -3 -11   3    1.40    0.27 
  -2 -11   3    4.49    0.55 
  -1 -11   3    2.41    0.35 
   0 -11   3   37.52    2.04 
   1 -11   3    2.37    0.40 
   2 -11   3    7.13    0.75 
   3 -11   3    4.02    0.53 
   4 -11   3    0.25    0.30 
   5 -11   3    5.08    0.53 
   6 -11   3    7.59    0.66 
   7 -11   3    8.09    0.70 
   8 -11   3    7.26    0.45 
   9 -11   3    1.47    0.22 
  10 -11   3   23.17    1.20 
  11 -11   3   37.96    2.48 
  12 -11   3    2.55    0.39 
  13 -11   3    0.30    0.14 
  14 -11   3    3.44    0.24 
  15 -11   3    0.07    0.10 
  -5 -10   3   10.12    0.96 
  -4 -10   3    0.00    0.25 
  -3 -10   3    0.94    0.33 
  -2 -10   3   19.07    1.11 
  -1 -10   3   26.89    1.37 
   0 -10   3    0.66    0.24 
   1 -10   3    1.58    0.37 
   2 -10   3    3.47    0.46 
   3 -10   3    3.21    0.42 
   4 -10   3   16.54    0.97 
   5 -10   3    4.49    0.43 
   6 -10   3    8.29    0.63 
   7 -10   3   17.50    1.02 
   8 -10   3    0.46    0.28 
   9 -10   3   10.84    0.87 
  10 -10   3    1.31    0.26 
  11 -10   3    2.30    0.24 
  12 -10   3    7.87    0.36 
  13 -10   3    6.17    0.31 
  14 -10   3    3.02    0.32 
  15 -10   3    4.37    0.32 
  -6  -9   3    4.03    0.43 
  -5  -9   3    8.47    0.92 
  -4  -9   3    6.34    0.74 
  -3  -9   3    2.41    0.30 
  -2  -9   3    0.74    0.24 
  -1  -9   3   10.37    0.68 
   0  -9   3    0.81    0.30 
   1  -9   3    5.43    0.51 
   2  -9   3    4.72    0.45 
   3  -9   3   19.26    1.02 
   4  -9   3   12.42    0.81 
   5  -9   3   75.23    3.49 
   6  -9   3   37.73    1.74 
   7  -9   3    0.90    0.25 
   8  -9   3    2.29    0.33 
   9  -9   3    0.84    0.19 
  10  -9   3    1.19    0.27 
  11  -9   3    7.83    0.38 
  12  -9   3    4.68    0.28 
  13  -9   3    0.11    0.14 
  14  -9   3    3.39    0.24 
  -7  -8   3   -0.03    0.21 
  -6  -8   3    6.32    0.66 
  -5  -8   3    0.46    0.19 
  -4  -8   3    0.47    0.20 
  -3  -8   3    7.18    0.52 
  -2  -8   3    0.26    0.25 
  -1  -8   3    2.16    0.33 
   0  -8   3   60.20    3.08 
   1  -8   3    7.53    0.51 
   2  -8   3   16.82    0.88 
   3  -8   3    3.21    0.31 
   4  -8   3    6.15    0.39 
   5  -8   3   18.21    0.95 
   6  -8   3   40.91    1.84 
   7  -8   3   45.86    2.21 
   8  -8   3   63.58    2.41 
   9  -8   3    5.35    0.37 
  10  -8   3    3.49    0.44 
  11  -8   3    3.48    0.33 
  12  -8   3    4.85    0.35 
  13  -8   3    8.79    0.49 
  14  -8   3    1.38    0.16 
  15  -8   3    1.27    0.20 
  -7  -7   3    2.76    0.48 
  -6  -7   3    4.37    0.37 
  -5  -7   3    0.38    0.20 
  -4  -7   3    7.28    0.55 
  -3  -7   3   17.69    1.06 
  -2  -7   3    0.99    0.26 
  -1  -7   3   42.39    2.00 
   0  -7   3    3.90    0.38 
   1  -7   3   43.71    1.98 
   2  -7   3    7.08    0.47 
   3  -7   3   77.87    3.24 
   4  -7   3   73.58    2.74 
   5  -7   3   19.83    0.84 
   6  -7   3   12.75    0.60 
   7  -7   3    5.20    0.40 
   8  -7   3    6.45    0.37 
   9  -7   3    4.56    0.39 
  10  -7   3    2.76    0.39 
  11  -7   3    0.17    0.18 
  12  -7   3    1.59    0.20 
  13  -7   3    3.45    0.28 
  14  -7   3    2.60    0.22 
  15  -7   3    0.01    0.12 
  -8  -6   3    0.90    0.30 
  -7  -6   3    3.38    0.34 
  -6  -6   3   11.60    0.71 
  -5  -6   3    6.55    0.50 
  -4  -6   3    9.27    0.66 
  -3  -6   3   32.16    1.61 
  -2  -6   3   42.19    1.90 
  -1  -6   3    9.84    0.64 
   0  -6   3    0.41    0.18 
   1  -6   3    3.03    0.27 
   2  -6   3    2.85    0.24 
   3  -6   3   71.00    2.97 
   4  -6   3   84.70    3.26 
   5  -6   3    1.81    0.20 
   6  -6   3    0.50    0.16 
   7  -6   3   48.35    1.91 
   8  -6   3   17.36    0.89 
   9  -6   3   17.20    0.90 
  10  -6   3   15.96    1.09 
  11  -6   3    4.29    0.34 
  12  -6   3   11.54    0.50 
  13  -6   3    3.89    0.25 
  14  -6   3    4.95    0.26 
  15  -6   3    2.63    0.19 
  -8  -5   3   10.88    0.58 
  -7  -5   3    2.43    0.31 
  -6  -5   3    4.70    0.39 
  -5  -5   3    3.02    0.42 
  -4  -5   3   69.99    4.78 
  -3  -5   3   20.63    1.00 
  -2  -5   3   15.71    0.87 
  -1  -5   3    1.28    0.19 
   0  -5   3  110.72    6.02 
   1  -5   3   36.05    2.02 
   2  -5   3   48.14    2.47 
   3  -5   3   18.94    1.21 
   4  -5   3  215.36   10.21 
   5  -5   3  129.00    5.91 
   6  -5   3    2.92    0.25 
   7  -5   3    8.04    0.44 
   8  -5   3    3.46    0.30 
   9  -5   3   13.18    0.73 
  10  -5   3    3.99    0.36 
  11  -5   3    7.37    0.36 
  12  -5   3    0.54    0.14 
  13  -5   3    0.20    0.12 
  14  -5   3    9.54    0.47 
  15  -5   3    9.75    0.49 
  -8  -4   3    4.45    0.47 
  -7  -4   3    0.65    0.21 
  -6  -4   3   15.44    1.11 
  -5  -4   3   14.24    0.96 
  -4  -4   3    4.25    0.44 
  -3  -4   3   64.58    2.75 
  -2  -4   3   73.50    4.23 
  -1  -4   3  192.72   10.29 
   0  -4   3   30.78    1.68 
   1  -4   3   56.25    2.76 
   2  -4   3  104.32    5.16 
   3  -4   3  121.94    5.43 
   4  -4   3   27.96    1.54 
   5  -4   3   37.58    1.88 
   6  -4   3    2.57    0.22 
   7  -4   3   84.47    4.01 
   8  -4   3    6.41    0.37 
   9  -4   3   75.52    3.36 
  10  -4   3    8.13    0.69 
  11  -4   3    7.83    0.38 
  12  -4   3    0.38    0.13 
  13  -4   3    5.15    0.28 
  14  -4   3    0.15    0.10 
  15  -4   3    0.17    0.11 
  -8  -3   3    4.05    0.44 
  -7  -3   3    2.14    0.36 
  -6  -3   3   15.43    1.18 
  -5  -3   3    2.55    0.32 
  -4  -3   3   78.41    5.14 
  -3  -3   3   79.13    3.86 
  -2  -3   3   20.70    1.31 
  -1  -3   3   97.99    5.48 
   0  -3   3   19.45    1.02 
   1  -3   3    6.40    0.46 
   2  -3   3    7.43    0.53 
   3  -3   3   16.75    0.89 
   4  -3   3   54.29    2.66 
   5  -3   3   45.46    2.35 
   6  -3   3   73.44    3.67 
   7  -3   3   67.28    3.36 
   8  -3   3   19.34    0.98 
   9  -3   3   34.44    1.62 
  10  -3   3   17.02    1.20 
  11  -3   3    6.66    0.35 
  12  -3   3    1.89    0.20 
  13  -3   3    0.52    0.14 
  14  -3   3    0.78    0.19 
  -8  -2   3    3.81    0.41 
  -7  -2   3    4.46    0.43 
  -6  -2   3   16.44    1.16 
  -5  -2   3    7.54    0.57 
  -3  -2   3   48.33    2.50 
  -2  -2   3   97.55    5.20 
  -1  -2   3    8.61    0.66 
   0  -2   3  115.61    8.81 
   1  -2   3   22.72    1.79 
   2  -2   3  112.82    5.54 
   3  -2   3    5.78    0.35 
   4  -2   3  103.96    5.09 
   5  -2   3   21.81    1.11 
   6  -2   3   82.28    4.05 
   7  -2   3   18.79    1.28 
   8  -2   3   41.64    2.01 
   9  -2   3    1.51    0.21 
  10  -2   3    0.42    0.22 
  11  -2   3    1.98    0.21 
  12  -2   3   20.61    1.41 
  13  -2   3    3.14    0.39 
  14  -2   3    5.33    0.41 
  -8  -1   3    5.88    0.48 
  -7  -1   3    5.91    0.54 
  -6  -1   3   42.79    3.00 
  -3  -1   3   54.67    4.34 
  -2  -1   3    5.48    0.83 
  -1  -1   3   20.55    1.82 
   0  -1   3   63.21    4.52 
   1  -1   3   57.02    4.50 
   2  -1   3   22.15    1.72 
   3  -1   3    8.80    0.48 
   4  -1   3  111.24    5.37 
   5  -1   3  204.24   10.14 
   6  -1   3    1.41    0.22 
   7  -1   3   12.00    0.91 
   8  -1   3   45.78    2.11 
   9  -1   3    1.83    0.43 
  10  -1   3    9.94    0.86 
  11  -1   3   23.32    1.72 
  12  -1   3    4.76    0.46 
  13  -1   3   12.86    0.92 
  14  -1   3    1.95    0.21 
  -8   0   3   64.52    4.12 
  -6   0   3    0.29    0.15 
  -2   0   3  111.65    8.76 
  -1   0   3   55.44    4.49 
   0   0   3    0.01    0.05 
   1   0   3   54.54    4.49 
   2   0   3  109.71    5.53 
   3   0   3   15.23    0.86 
   4   0   3   29.32    1.51 
   5   0   3  113.11    5.84 
   6   0   3    0.30    0.18 
   7   0   3    5.71    0.55 
   8   0   3   59.91    4.16 
   9   0   3    0.96    0.37 
  10   0   3    1.18    0.31 
  11   0   3   39.60    2.57 
  12   0   3    9.97    0.77 
  13   0   3    0.92    0.17 
  -8   1   3   45.49    2.99 
  -7   1   3   11.88    0.78 
  -1   1   3   55.91    4.47 
   0   1   3   55.44    4.49 
   1   1   3   22.43    1.72 
   2   1   3    6.04    0.35 
   3   1   3   51.77    2.64 
   4   1   3   36.43    1.84 
   5   1   3    2.87    0.30 
   6   1   3   45.84    2.35 
   7   1   3    6.25    0.65 
   8   1   3    5.13    0.61 
   9   1   3    1.05    0.30 
  10   1   3    1.45    0.32 
  11   1   3    3.79    0.43 
  12   1   3    3.63    0.37 
  13   1   3    0.36    0.11 
  -7   2   3   19.94    1.19 
  -1   2   3   20.76    1.70 
   0   2   3  114.27    8.71 
   1   2   3   10.12    0.49 
   2   2   3  109.27    5.09 
   3   2   3   48.33    2.34 
   4   2   3    2.43    0.26 
   5   2   3    8.37    0.50 
   6   2   3   17.20    0.95 
   7   2   3    4.94    0.56 
   8   2   3    3.11    0.51 
   9   2   3    8.23    0.70 
  10   2   3    7.51    0.66 
  11   2   3    0.71    0.20 
  12   2   3    2.42    0.25 
  -1   3   3    5.60    0.53 
   0   3   3   17.53    0.87 
   1   3   3  108.35    5.37 
   2   3   3   23.25    1.11 
   3   3   3   76.95    3.65 
   4   3   3   85.03    3.96 
   5   3   3    3.03    0.31 
   6   3   3   16.63    1.25 
   7   3   3    1.83    0.39 
   8   3   3    3.97    0.52 
   9   3   3    4.90    0.53 
  10   3   3    6.66    0.56 
  11   3   3    3.75    0.34 
  -1   4   3   55.12    4.16 
   0   4   3   33.97    1.51 
   1   4   3  218.45   10.14 
   2   4   3   84.11    4.04 
   3   4   3   65.16    3.32 
   4   4   3    4.48    0.38 
   5   4   3   15.40    1.03 
   6   4   3   14.74    1.16 
 -13   5   3    0.26    0.14 
  -1   5   3   36.55    2.90 
   0   5   3  119.80    5.84 
   1   5   3    1.08    0.19 
   2   5   3   16.43    0.95 
   3   5   3   22.11    1.08 
   4   5   3   73.03    4.77 
   5   5   3    3.35    0.47 
 -14   6   3    4.97    0.37 
  -6   6   3    0.47    0.16 
  -2   6   3    2.33    0.37 
  -1   6   3    3.14    0.42 
   0   6   3    0.37    0.16 
   1   6   3   10.37    0.65 
   2   6   3   44.43    2.22 
   3   6   3   33.08    2.29 
   4   6   3    9.13    0.77 
  -3   7   3   73.45    6.23 
  -2   7   3    6.86    0.76 
  -1   7   3   46.15    2.35 
   0   7   3    3.82    0.37 
   1   7   3   44.87    2.34 
   2   7   3    0.42    0.26 
   3   7   3   16.49    1.27 
   8   7   3    2.05    0.36 
 -15   8   3    1.44    0.17 
  -4   8   3    5.40    0.61 
  -3   8   3    3.34    0.49 
  -2   8   3   16.89    0.95 
  -1   8   3    7.19    0.50 
   0   8   3   59.86    4.15 
   1   8   3    2.56    0.43 
   2   8   3    0.41    0.29 
  -7   9   3    1.62    0.29 
  -4   9   3   11.86    1.22 
  -2   9   3    5.02    0.54 
  -1   9   3    5.12    0.60 
   0   9   3    0.92    0.32 
  -3  10   3    2.36    0.43 
  -2  10   3    3.47    0.53 
   1  13   3    1.49    0.32 
   8 -15   4    3.70    0.36 
   9 -15   4   16.93    1.07 
  10 -15   4    0.71    0.17 
  11 -15   4    2.99    0.29 
   7 -14   4   -0.25    0.19 
   8 -14   4    8.17    0.61 
   9 -14   4    1.95    0.34 
  10 -14   4    9.98    0.70 
  11 -14   4    0.13    0.17 
  12 -14   4    0.10    0.16 
  13 -14   4    3.49    0.31 
   5 -13   4    4.77    0.56 
   6 -13   4    1.24    0.20 
   7 -13   4    2.34    0.27 
   8 -13   4   11.59    0.63 
   9 -13   4    6.63    0.54 
  10 -13   4    0.07    0.20 
  11 -13   4    1.12    0.23 
  12 -13   4    3.01    0.33 
  13 -13   4    0.40    0.16 
  14 -13   4    2.92    0.28 
  -2 -12   4    0.64    0.20 
  -1 -12   4    1.87    0.42 
   2 -12   4    2.53    0.40 
   3 -12   4   -0.10    0.29 
   4 -12   4    0.10    0.30 
   5 -12   4   21.15    1.12 
   6 -12   4    1.75    0.21 
   7 -12   4    2.26    0.27 
   8 -12   4    0.43    0.18 
   9 -12   4    0.49    0.19 
  10 -12   4    8.84    0.55 
  11 -12   4   26.66    1.81 
  12 -12   4   16.97    1.16 
  13 -12   4    0.91    0.20 
  14 -12   4    1.49    0.24 
  -3 -11   4    0.08    0.22 
  -2 -11   4    0.54    0.29 
  -1 -11   4   26.76    2.40 
   0 -11   4    5.38    0.43 
   1 -11   4    7.00    0.74 
   2 -11   4    0.50    0.33 
   3 -11   4    0.75    0.32 
   4 -11   4    5.47    0.60 
   5 -11   4    1.98    0.35 
   6 -11   4    0.06    0.28 
   7 -11   4    0.67    0.31 
   8 -11   4   12.39    0.68 
   9 -11   4    6.12    0.42 
  10 -11   4   14.14    0.74 
  11 -11   4    4.83    0.51 
  12 -11   4   11.73    0.87 
  13 -11   4   -0.10    0.12 
  14 -11   4    2.85    0.21 
  15 -11   4   10.04    0.65 
  -4 -10   4    8.88    0.92 
  -3 -10   4    0.03    0.30 
  -2 -10   4   10.40    0.62 
  -1 -10   4   12.09    0.83 
   0 -10   4   26.11    1.42 
   1 -10   4   -0.02    0.30 
   2 -10   4   10.09    0.76 
   3 -10   4    0.31    0.27 
   4 -10   4    9.06    0.65 
   5 -10   4    0.35    0.24 
   6 -10   4    6.35    0.52 
   7 -10   4   11.79    0.74 
   8 -10   4    3.25    0.44 
   9 -10   4    0.40    0.31 
  10 -10   4   23.64    1.71 
  11 -10   4    7.82    0.47 
  12 -10   4    2.56    0.22 
  13 -10   4    1.28    0.14 
  14 -10   4    0.16    0.16 
  15 -10   4    1.74    0.21 
  -6  -9   4   15.91    1.41 
  -5  -9   4    2.98    0.45 
  -4  -9   4    4.61    0.73 
  -3  -9   4    0.92    0.22 
  -2  -9   4    6.51    0.49 
  -1  -9   4    0.82    0.24 
   0  -9   4    0.26    0.28 
   1  -9   4   30.09    2.84 
   2  -9   4    1.37    0.30 
   3  -9   4    5.71    0.48 
   4  -9   4   17.76    0.97 
   5  -9   4    7.01    0.51 
   6  -9   4   25.83    1.42 
   7  -9   4   40.44    2.03 
   8  -9   4   11.47    0.73 
   9  -9   4    0.29    0.28 
  10  -9   4    0.07    0.23 
  11  -9   4    1.08    0.15 
  12  -9   4    0.19    0.13 
  13  -9   4    9.83    0.50 
  14  -9   4    0.70    0.13 
  15  -9   4    3.33    0.29 
  -6  -8   4    6.01    0.80 
  -5  -8   4   13.24    0.71 
  -4  -8   4    0.06    0.20 
  -3  -8   4   12.62    0.77 
  -2  -8   4    3.42    0.43 
  -1  -8   4   10.75    0.77 
   0  -8   4    6.83    0.59 
   1  -8   4  109.07    5.46 
   2  -8   4   17.06    0.89 
   3  -8   4    1.79    0.26 
   4  -8   4   41.62    1.83 
   5  -8   4   28.65    1.21 
   6  -8   4   10.30    0.57 
   7  -8   4   38.12    1.58 
   8  -8   4    8.47    0.43 
   9  -8   4   33.55    1.36 
  10  -8   4   10.47    0.67 
  11  -8   4    0.52    0.19 
  12  -8   4    0.03    0.16 
  13  -8   4    4.90    0.33 
  14  -8   4    3.49    0.25 
  15  -8   4    2.87    0.26 
  -7  -7   4    0.12    0.27 
  -6  -7   4    1.74    0.26 
  -5  -7   4    1.39    0.24 
  -4  -7   4    0.85    0.22 
  -3  -7   4   10.18    0.75 
  -2  -7   4   40.92    2.09 
  -1  -7   4   31.93    1.62 
   0  -7   4   36.44    1.67 
   1  -7   4    0.32    0.19 
   2  -7   4   45.00    1.96 
   3  -7   4    5.43    0.73 
   4  -7   4   75.83    3.26 
   5  -7   4   73.10    2.97 
   6  -7   4    2.15    0.26 
   7  -7   4   36.38    1.32 
   8  -7   4  119.49    4.35 
   9  -7   4    1.85    0.26 
  10  -7   4    0.26    0.22 
  11  -7   4    5.23    0.38 
  12  -7   4   23.28    1.07 
  13  -7   4    1.16    0.18 
  14  -7   4    0.11    0.11 
  15  -7   4    3.91    0.31 
  -8  -6   4    4.09    0.54 
  -7  -6   4    1.99    0.25 
  -6  -6   4    1.12    0.22 
  -5  -6   4   -0.11    0.20 
  -4  -6   4    5.88    0.58 
  -3  -6   4   28.21    1.47 
  -2  -6   4    8.47    0.59 
  -1  -6   4    2.53    0.29 
   0  -6   4   19.10    0.98 
   1  -6   4   36.47    1.63 
   2  -6   4   15.62    0.79 
   3  -6   4    4.13    0.28 
   4  -6   4   41.73    1.78 
   5  -6   4    0.06    0.14 
   6  -6   4   21.45    0.91 
   7  -6   4    0.80    0.19 
   8  -6   4   17.58    0.89 
   9  -6   4    5.59    0.42 
  10  -6   4    8.96    0.58 
  11  -6   4    1.80    0.21 
  12  -6   4    1.60    0.20 
  13  -6   4    2.27    0.19 
  14  -6   4    7.91    0.33 
  15  -6   4   15.65    0.73 
  -8  -5   4    4.54    0.68 
  -7  -5   4   23.34    1.26 
  -6  -5   4    1.69    0.25 
  -5  -5   4    0.31    0.23 
  -4  -5   4    5.75    0.54 
  -3  -5   4   25.74    1.24 
  -2  -5   4   67.00    3.01 
  -1  -5   4    0.17    0.16 
   0  -5   4   27.90    1.80 
   1  -5   4    2.34    0.45 
   2  -5   4    1.81    0.34 
   3  -5   4  114.92    5.22 
   4  -5   4    1.93    0.29 
   5  -5   4   30.20    1.64 
   6  -5   4   40.10    1.56 
   7  -5   4   48.17    1.88 
   8  -5   4    1.22    0.21 
   9  -5   4   17.53    0.88 
  10  -5   4    0.24    0.20 
  11  -5   4    0.14    0.14 
  12  -5   4    1.30    0.16 
  13  -5   4   10.98    0.48 
  14  -5   4    1.74    0.20 
  15  -5   4    0.97    0.11 
  -8  -4   4    0.18    0.35 
  -7  -4   4    5.54    0.44 
  -6  -4   4    8.09    0.69 
  -5  -4   4   15.58    1.16 
  -4  -4   4   42.76    2.80 
  -3  -4   4   83.89    3.31 
  -2  -4   4   38.96    2.39 
  -1  -4   4    0.82    0.40 
   0  -4   4  147.89    7.65 
   1  -4   4  147.06    7.04 
   2  -4   4   42.19    2.13 
   3  -4   4   42.87    2.20 
   4  -4   4  160.83    7.56 
   5  -4   4    3.56    0.32 
   6  -4   4   16.91    0.73 
   7  -4   4    9.28    0.60 
   8  -4   4   44.51    1.99 
   9  -4   4    6.72    0.43 
  10  -4   4    6.39    0.45 
  11  -4   4    0.45    0.15 
  12  -4   4    0.46    0.14 
  13  -4   4    5.95    0.29 
  14  -4   4    8.99    0.47 
  15  -4   4    2.41    0.25 
  -7  -3   4    0.36    0.22 
  -6  -3   4    4.95    0.48 
  -5  -3   4    1.37    0.22 
  -4  -3   4    9.09    0.63 
  -3  -3   4    3.53    0.55 
  -2  -3   4   91.86    5.25 
  -1  -3   4   38.76    2.27 
   0  -3   4    4.82    0.46 
   1  -3   4    9.76    0.56 
   2  -3   4   79.59    3.76 
   3  -3   4    4.03    0.31 
   4  -3   4  138.51    6.95 
   5  -3   4    1.26    0.19 
   6  -3   4    3.74    0.34 
   7  -3   4   83.67    4.06 
   8  -3   4   26.86    1.27 
   9  -3   4   25.97    1.32 
  10  -3   4   11.08    0.64 
  11  -3   4   12.88    0.54 
  12  -3   4    0.57    0.13 
  13  -3   4    0.18    0.13 
  14  -3   4    0.22    0.15 
  -7  -2   4    1.95    0.31 
  -6  -2   4   16.09    1.17 
  -5  -2   4   43.24    2.99 
  -3  -2   4    1.09    0.39 
  -2  -2   4   37.76    2.17 
  -1  -2   4   69.32    3.80 
   0  -2   4  168.99   12.92 
   1  -2   4   22.57    1.72 
   2  -2   4  167.01    8.16 
   3  -2   4    8.54    0.47 
   4  -2   4   41.12    2.06 
   5  -2   4  106.67    5.13 
   6  -2   4   43.59    2.20 
   7  -2   4   72.72    3.69 
   8  -2   4   10.93    0.55 
   9  -2   4   39.65    1.92 
  10  -2   4    2.68    0.27 
  11  -2   4    5.90    0.41 
  12  -2   4    9.22    0.78 
  13  -2   4    1.32    0.23 
  14  -2   4    0.38    0.14 
  -7  -1   4  118.82    7.55 
  -3  -1   4  152.16    7.03 
  -2  -1   4    7.54    0.91 
  -1  -1   4   20.14    1.75 
   0  -1   4   20.72    1.72 
   1  -1   4   20.58    1.70 
   2  -1   4   19.06    1.04 
   3  -1   4   72.71    3.72 
   4  -1   4   42.77    2.15 
   5  -1   4    1.93    0.24 
   6  -1   4    0.10    0.18 
   7  -1   4    2.60    0.31 
   8  -1   4   39.85    1.69 
   9  -1   4    9.32    0.95 
  10  -1   4    0.97    0.29 
  11  -1   4   14.76    1.06 
  12  -1   4   27.85    1.88 
  13  -1   4    3.06    0.33 
  14  -1   4    3.45    0.30 
  -6   0   4   20.92    1.36 
  -2   0   4  141.77   12.86 
  -1   0   4   22.43    1.69 
   0   0   4  508.65   39.92 
   1   0   4   21.05    1.69 
   2   0   4  162.83    8.15 
   3   0   4    3.96    0.27 
   4   0   4  155.64    7.52 
   5   0   4   30.69    1.58 
   6   0   4   20.05    1.11 
   7   0   4   35.33    1.94 
   8   0   4    9.84    0.78 
   9   0   4    0.47    0.35 
  10   0   4   25.21    1.79 
  11   0   4    3.87    0.54 
  12   0   4   18.45    1.20 
  13   0   4    0.09    0.14 
  -1   1   4   20.66    1.66 
   0   1   4   20.75    1.68 
   1   1   4   19.64    1.64 
   2   1   4    7.98    0.46 
   3   1   4  137.05    6.94 
   4   1   4    2.93    0.26 
   5   1   4   38.66    1.94 
   6   1   4    1.12    0.23 
   7   1   4  119.44    7.54 
   8   1   4   33.81    2.34 
   9   1   4   -0.02    0.27 
  10   1   4    8.62    0.73 
  11   1   4   11.85    0.90 
  12   1   4    1.03    0.20 
  13   1   4    3.00    0.27 
  -2   2   4  168.55   12.81 
  -1   2   4   21.07    1.63 
   0   2   4  168.15   12.84 
   1   2   4   75.71    3.72 
   2   2   4   43.30    2.06 
   3   2   4    0.98    0.16 
   4   2   4   18.33    0.91 
   5   2   4   47.77    2.34 
   6   2   4   17.28    0.96 
   7   2   4    1.79    0.37 
   8   2   4   10.32    0.90 
   9   2   4    0.91    0.29 
  10   2   4    2.54    0.34 
  11   2   4    0.11    0.18 
  12   2   4    1.24    0.21 
  -2   3   4   75.95    5.84 
  -1   3   4    7.83    0.71 
   0   3   4    4.63    0.27 
   1   3   4   44.99    2.16 
   2   3   4  109.05    5.12 
   3   3   4    3.32    0.29 
   4   3   4    8.94    0.53 
   5   3   4    1.20    0.22 
   6   3   4    5.21    0.57 
   7   3   4    0.72    0.32 
   8   3   4    0.71    0.28 
   9   3   4   -0.03    0.23 
  10   3   4    1.44    0.24 
  11   3   4    2.49    0.30 
  -2   4   4   40.23    3.22 
  -1   4   4  137.07   10.92 
   0   4   4  153.23    7.52 
   1   4   4    0.96    0.17 
   2   4   4   45.78    2.18 
   3   4   4   88.47    4.02 
   4   4   4   44.61    2.18 
   5   4   4   16.05    1.22 
   6   4   4    8.44    0.78 
   8   4   4    0.32    0.27 
 -13   5   4   11.55    0.73 
  -2   5   4    0.65    0.20 
  -1   5   4    2.05    0.36 
   0   5   4   30.29    1.57 
   1   5   4    0.01    0.14 
   2   5   4   74.58    3.66 
   3   5   4   25.57    1.38 
   4   5   4    4.85    0.60 
   5   5   4    0.05    0.27 
 -14   6   4    8.26    0.49 
  -3   6   4    3.48    0.42 
  -2   6   4   16.60    1.41 
  -1   6   4   35.72    1.92 
   0   6   4   20.23    1.09 
   1   6   4    2.35    0.28 
   2   6   4    8.14    0.58 
   3   6   4   27.49    1.88 
   4   6   4    6.62    0.63 
  -4   7   4   76.47    6.32 
  -2   7   4   43.37    3.67 
  -1   7   4    0.27    0.16 
   0   7   4   39.13    1.94 
   1   7   4   33.73    2.41 
   2   7   4   41.20    2.75 
   3   7   4   10.10    0.88 
   8   7   4    2.90    0.41 
 -15   8   4    3.25    0.23 
  -4   8   4   40.96    3.43 
  -3   8   4    1.59    0.36 
  -2   8   4   17.26    0.96 
  -1   8   4  107.04    5.81 
   0   8   4    5.85    0.67 
   1   8   4   10.54    0.90 
   2   8   4    3.35    0.50 
  -3   9   4    5.21    0.57 
  -2   9   4    0.98    0.32 
  -1   9   4   34.87    2.34 
   0   9   4    0.35    0.30 
  -4  10   4    9.31    0.80 
  -3  10   4    0.49    0.31 
  -2  10   4    9.62    0.90 
   8 -15   5    1.41    0.22 
   9 -15   5    0.03    0.16 
  10 -15   5    1.18    0.18 
  11 -15   5   -0.03    0.13 
   7 -14   5    0.75    0.22 
   8 -14   5    3.56    0.39 
   9 -14   5    2.63    0.33 
  10 -14   5    0.56    0.20 
  11 -14   5    0.48    0.18 
  12 -14   5    0.88    0.18 
   5 -13   5    0.47    0.31 
   6 -13   5    0.26    0.17 
   7 -13   5    4.43    0.35 
   8 -13   5    8.57    0.49 
   9 -13   5    0.10    0.22 
  10 -13   5    1.45    0.25 
  11 -13   5    0.09    0.19 
  12 -13   5    0.57    0.19 
  13 -13   5    0.45    0.16 
  -1 -12   5    0.82    0.24 
   2 -12   5    2.44    0.39 
   3 -12   5    1.53    0.37 
   4 -12   5    0.99    0.33 
   5 -12   5   11.21    0.63 
   6 -12   5    2.49    0.27 
   7 -12   5    0.92    0.20 
   8 -12   5   12.65    0.67 
   9 -12   5    2.02    0.23 
  10 -12   5    0.22    0.18 
  11 -12   5    1.38    0.25 
  12 -12   5    1.89    0.32 
  13 -12   5    0.08    0.17 
  14 -12   5    0.07    0.14 
  -3 -11   5    0.26    0.23 
  -2 -11   5    0.03    0.25 
  -1 -11   5    0.70    0.31 
   0 -11   5   14.30    1.08 
   1 -11   5    4.88    0.59 
   2 -11   5    7.35    0.74 
   3 -11   5    4.22    0.56 
   4 -11   5    0.05    0.30 
   5 -11   5    3.70    0.50 
   6 -11   5   13.89    1.04 
   7 -11   5    1.80    0.35 
   8 -11   5    1.17    0.20 
   9 -11   5    0.26    0.18 
  10 -11   5    1.91    0.23 
  11 -11   5   13.74    1.01 
  12 -11   5    0.35    0.21 
  13 -11   5    0.20    0.19 
  14 -11   5    0.75    0.15 
  -4 -10   5    0.63    0.27 
  -3 -10   5    1.40    0.34 
  -2 -10   5   -0.15    0.20 
  -1 -10   5    1.92    0.27 
   0 -10   5    2.71    0.38 
   1 -10   5    0.53    0.32 
   2 -10   5    8.98    0.71 
   3 -10   5    0.21    0.26 
   4 -10   5    0.76    0.28 
   5 -10   5    1.48    0.29 
   6 -10   5   14.05    0.89 
   7 -10   5    0.12    0.26 
   8 -10   5    3.72    0.45 
   9 -10   5    7.81    0.76 
  10 -10   5    3.55    0.45 
  11 -10   5    5.32    0.36 
  12 -10   5    1.94    0.17 
  13 -10   5   13.01    0.65 
  14 -10   5    3.44    0.33 
  15 -10   5    0.44    0.12 
  -5  -9   5    1.99    0.47 
  -4  -9   5    0.08    0.31 
  -3  -9   5    1.39    0.24 
  -2  -9   5    0.13    0.21 
  -1  -9   5    8.06    0.58 
   0  -9   5    1.73    0.34 
   1  -9   5    3.59    0.48 
   2  -9   5   11.64    0.77 
   3  -9   5    2.12    0.32 
   4  -9   5    1.21    0.26 
   5  -9   5    1.48    0.26 
   6  -9   5   12.09    0.74 
   7  -9   5    2.78    0.36 
   8  -9   5    0.59    0.27 
   9  -9   5    2.52    0.36 
  10  -9   5    0.16    0.24 
  11  -9   5    7.56    0.38 
  12  -9   5    1.72    0.21 
  13  -9   5    0.49    0.15 
  14  -9   5    4.74    0.28 
  15  -9   5    0.35    0.12 
  -6  -8   5    3.34    0.53 
  -5  -8   5    7.92    0.90 
  -4  -8   5   12.79    0.76 
  -3  -8   5    1.09    0.24 
  -2  -8   5    3.45    0.44 
  -1  -8   5    0.59    0.27 
   0  -8   5   47.61    2.60 
   1  -8   5    4.99    0.44 
   2  -8   5    0.36    0.21 
   3  -8   5   29.57    1.38 
   4  -8   5    1.75    0.23 
   5  -8   5    9.37    0.56 
   6  -8   5    6.05    0.43 
   7  -8   5    3.47    0.35 
   8  -8   5   54.76    2.04 
   9  -8   5    4.60    0.36 
  10  -8   5    9.73    0.65 
  11  -8   5    4.09    0.35 
  12  -8   5    0.81    0.18 
  13  -8   5    0.85    0.16 
  14  -8   5    3.58    0.24 
  15  -8   5   -0.01    0.12 
  -7  -7   5    0.36    0.27 
  -6  -7   5    4.67    0.36 
  -5  -7   5    0.53    0.21 
  -4  -7   5    1.16    0.24 
  -3  -7   5    0.10    0.27 
  -2  -7   5    2.37    0.36 
  -1  -7   5    3.58    0.37 
   0  -7   5   50.81    2.46 
   1  -7   5   25.28    1.25 
   2  -7   5    7.09    0.44 
   3  -7   5   50.64    2.18 
   4  -7   5   39.26    1.63 
   5  -7   5    1.88    0.24 
   6  -7   5   32.99    1.40 
   7  -7   5   60.26    2.02 
   8  -7   5    4.54    0.32 
   9  -7   5   12.73    0.71 
  10  -7   5    0.28    0.22 
  11  -7   5   -0.03    0.18 
  12  -7   5   11.15    0.59 
  13  -7   5    0.41    0.15 
  14  -7   5    0.52    0.13 
  15  -7   5    1.78    0.21 
  -7  -6   5    0.08    0.31 
  -6  -6   5    1.73    0.25 
  -5  -6   5   14.03    0.80 
  -4  -6   5   14.42    1.05 
  -3  -6   5   11.47    0.76 
  -2  -6   5    6.21    0.45 
  -1  -6   5   29.57    1.45 
   0  -6   5    5.81    0.39 
   1  -6   5   11.58    0.64 
   2  -6   5    6.02    0.39 
   3  -6   5    8.10    0.46 
   4  -6   5    8.66    0.44 
   5  -6   5    5.26    0.34 
   6  -6   5    4.84    0.35 
   7  -6   5   27.91    1.18 
   8  -6   5    0.38    0.20 
   9  -6   5    2.20    0.30 
  10  -6   5    0.48    0.23 
  11  -6   5    3.61    0.32 
  12  -6   5    2.09    0.23 
  13  -6   5    4.06    0.30 
  14  -6   5    3.01    0.19 
  15  -6   5    0.14    0.12 
  -8  -5   5    0.92    0.34 
  -7  -5   5   12.13    1.18 
  -6  -5   5    4.16    0.37 
  -5  -5   5    2.19    0.36 
  -4  -5   5    1.25    0.26 
  -3  -5   5    9.83    0.59 
  -2  -5   5    2.23    0.27 
  -1  -5   5    4.74    0.36 
   0  -5   5    0.69    0.42 
   1  -5   5    0.63    0.37 
   2  -5   5   41.40    2.22 
   3  -5   5   84.57    4.01 
   4  -5   5   13.89    0.81 
   5  -5   5    0.77    0.16 
   6  -5   5   12.47    0.58 
   7  -5   5    6.44    0.39 
   8  -5   5   32.40    1.46 
   9  -5   5    1.77    0.24 
  10  -5   5    1.76    0.27 
  11  -5   5   13.28    0.57 
  12  -5   5    1.26    0.16 
  13  -5   5    7.96    0.36 
  14  -5   5    2.40    0.21 
  15  -5   5    0.63    0.09 
  -8  -4   5    0.44    0.35 
  -7  -4   5   -0.17    0.35 
  -6  -4   5    0.41    0.23 
  -5  -4   5    1.18    0.25 
  -4  -4   5    1.48    0.24 
  -3  -4   5   37.33    1.65 
  -2  -4   5    7.14    0.46 
  -1  -4   5   11.21    0.94 
   0  -4   5   31.47    1.84 
   1  -4   5    8.26    0.57 
   2  -4   5   48.31    2.24 
   3  -4   5    1.19    0.21 
   4  -4   5   32.54    1.73 
   5  -4   5    0.87    0.21 
   6  -4   5    6.22    0.35 
   7  -4   5   54.61    2.69 
   8  -4   5    1.98    0.24 
   9  -4   5    1.54    0.23 
  10  -4   5   14.05    0.79 
  11  -4   5    1.42    0.16 
  12  -4   5   12.17    0.53 
  13  -4   5    0.40    0.11 
  14  -4   5    0.49    0.11 
  15  -4   5    0.09    0.10 
  -6  -3   5    2.59    0.34 
  -5  -3   5   30.12    2.02 
  -4  -3   5   52.83    3.40 
  -3  -3   5    7.94    0.80 
  -2  -3   5   70.36    4.05 
  -1  -3   5    0.40    0.31 
   0  -3   5   63.27    3.05 
   1  -3   5    4.90    0.40 
   2  -3   5   50.56    2.48 
   3  -3   5   60.54    2.98 
   4  -3   5    6.63    0.43 
   5  -3   5   43.47    2.13 
   6  -3   5    8.63    0.55 
   7  -3   5   38.84    1.99 
   8  -3   5    9.45    0.55 
   9  -3   5   11.97    0.66 
  10  -3   5    0.09    0.19 
  11  -3   5    0.64    0.15 
  12  -3   5    1.74    0.16 
  13  -3   5    1.45    0.17 
  14  -3   5    0.28    0.16 
  -6  -2   5    0.29    0.18 
  -5  -2   5    6.26    0.50 
  -3  -2   5   41.08    2.24 
  -2  -2   5   35.82    2.25 
  -1  -2   5   48.20    2.53 
   0  -2   5  209.48   15.56 
   1  -2   5   11.73    0.69 
   2  -2   5  206.80    9.84 
   3  -2   5    4.30    0.30 
   4  -2   5   43.78    2.16 
   5  -2   5   84.39    3.93 
   6  -2   5    8.18    0.52 
   7  -2   5    2.01    0.29 
   8  -2   5    5.77    0.43 
   9  -2   5    2.24    0.28 
  10  -2   5    3.83    0.28 
  11  -2   5    0.35    0.17 
  12  -2   5    0.23    0.16 
  13  -2   5    0.30    0.19 
  14  -2   5    0.87    0.16 
  -3  -1   5    6.81    0.57 
  -2  -1   5    3.09    0.65 
  -1  -1   5   12.91    1.15 
   0  -1   5   28.54    2.32 
   1  -1   5   29.70    2.31 
   2  -1   5   12.15    0.66 
   3  -1   5   50.73    2.45 
   4  -1   5    1.22    0.16 
   5  -1   5   12.71    0.73 
   6  -1   5    5.66    0.42 
   7  -1   5   32.87    1.72 
   8  -1   5    3.52    0.32 
   9  -1   5    0.61    0.20 
  10  -1   5    8.82    0.74 
  11  -1   5    1.25    0.31 
  12  -1   5    1.13    0.26 
  13  -1   5    0.36    0.18 
  14  -1   5    0.45    0.12 
  -2   0   5  162.11   15.48 
  -1   0   5   29.53    2.29 
   0   0   5    0.02    0.10 
   1   0   5   28.67    2.29 
   2   0   5  202.45    9.82 
   3   0   5   55.67    2.95 
   4   0   5   32.62    1.70 
   5   0   5    0.63    0.18 
   6   0   5    5.54    0.42 
   7   0   5   59.02    2.97 
   8   0   5   52.69    3.53 
   9   0   5    1.99    0.45 
  10   0   5    3.59    0.50 
  11   0   5   15.77    1.08 
  12   0   5    2.16    0.36 
  13   0   5    0.57    0.15 
  -1   1   5   28.37    2.27 
   0   1   5   27.24    2.28 
   1   1   5   12.92    0.66 
   2   1   5    4.65    0.29 
   3   1   5    6.48    0.40 
   4   1   5    0.66    0.17 
   5   1   5   12.37    0.71 
   6   1   5   27.38    1.44 
   7   1   5    4.30    0.41 
   8   1   5    5.77    0.64 
   9   1   5    0.84    0.30 
  10   1   5    4.89    0.56 
  11   1   5    0.18    0.22 
  12   1   5    0.08    0.16 
  13   1   5    0.03    0.10 
  -2   2   5  196.61   15.44 
  -1   2   5   12.42    1.02 
   0   2   5  210.54   15.47 
   1   2   5   51.14    2.45 
   2   2   5   44.67    2.16 
   3   2   5   44.55    2.11 
   4   2   5    6.45    0.42 
   5   2   5    6.47    0.46 
   6   2   5    0.20    0.21 
   7   2   5   12.19    0.98 
   8   2   5    9.09    0.84 
   9   2   5    7.06    0.71 
  10   2   5    1.74    0.31 
  11   2   5    0.53    0.19 
  12   2   5    0.43    0.13 
 -11   3   5    0.48    0.17 
  -3   3   5   59.15    4.61 
  -2   3   5   45.86    3.82 
  -1   3   5    4.86    0.28 
   0   3   5   58.80    2.95 
   1   3   5    0.55    0.13 
   2   3   5   82.61    3.92 
   3   3   5    8.79    0.51 
   4   3   5   55.58    2.64 
   5   3   5   31.03    1.59 
   6   3   5    2.77    0.46 
   7   3   5    0.27    0.31 
   8   3   5    3.31    0.54 
   9   3   5    2.50    0.32 
  10   3   5   14.16    0.98 
  11   3   5    0.59    0.16 
 -12   4   5   12.38    0.79 
  -3   4   5    0.98    0.19 
  -2   4   5   44.03    3.38 
  -1   4   5    6.89    0.39 
   0   4   5   32.48    1.69 
   1   4   5   13.09    0.72 
   2   4   5    7.72    0.48 
   3   4   5   39.48    1.95 
   4   4   5    1.22    0.22 
   5   4   5    1.15    0.33 
   6   4   5    0.47    0.29 
   8   4   5    0.35    0.26 
   9   4   5    0.39    0.22 
 -13   5   5    8.49    0.54 
  -3   5   5   77.48    6.15 
  -2   5   5   40.53    3.31 
  -1   5   5    0.54    0.14 
   0   5   5    0.20    0.14 
   1   5   5    5.09    0.38 
   2   5   5    2.07    0.25 
   3   5   5    9.82    0.60 
   4   5   5    1.81    0.34 
   5   5   5    2.77    0.41 
  -3   6   5    7.49    0.77 
  -2   6   5    5.57    0.62 
  -1   6   5   11.81    0.68 
   0   6   5    5.78    0.40 
   1   6   5   32.97    1.69 
   2   6   5    7.19    0.46 
   3   6   5   11.12    0.91 
   4   6   5   13.63    1.08 
  -3   7   5   51.06    4.15 
  -2   7   5    6.27    0.44 
  -1   7   5   26.03    1.42 
   0   7   5   53.33    2.94 
   1   7   5    3.89    0.48 
   2   7   5    1.93    0.37 
   3   7   5    0.16    0.28 
  -3   8   5   30.23    2.51 
  -2   8   5    0.24    0.17 
  -1   8   5    5.42    0.54 
   0   8   5   49.87    3.50 
   1   8   5    0.39    0.27 
   2   8   5    2.93    0.49 
 -15   9   5    0.29    0.11 
  -3   9   5    2.61    0.44 
  -2   9   5   10.82    0.94 
  -1   9   5    3.49    0.54 
   0   9   5    2.01    0.39 
  -3  10   5    0.20    0.30 
  -2  10   5    9.32    0.85 
   7 -15   6    0.11    0.15 
   8 -15   6    1.11    0.19 
   9 -15   6    5.60    0.45 
  10 -15   6    5.63    0.43 
   6 -14   6    2.01    0.31 
   7 -14   6   -0.17    0.20 
   8 -14   6    1.08    0.22 
   9 -14   6   -0.23    0.19 
  10 -14   6   -0.06    0.18 
  11 -14   6    0.89    0.19 
  12 -14   6    0.27    0.15 
   5 -13   6    4.30    0.44 
   6 -13   6    0.05    0.17 
   7 -13   6    1.48    0.21 
   8 -13   6    1.02    0.24 
   9 -13   6    0.36    0.22 
  10 -13   6    0.08    0.20 
  11 -13   6    0.08    0.19 
  12 -13   6    0.33    0.18 
  13 -13   6    0.33    0.15 
   2 -12   6    3.17    0.49 
   3 -12   6    6.62    0.63 
   4 -12   6   12.42    1.18 
   5 -12   6   24.13    1.18 
   6 -12   6    8.20    0.49 
   7 -12   6   17.00    0.85 
   8 -12   6    5.78    0.40 
   9 -12   6    1.73    0.22 
  10 -12   6    1.74    0.22 
  11 -12   6    6.08    0.52 
  12 -12   6    0.65    0.21 
  13 -12   6    1.17    0.21 
  14 -12   6    0.21    0.13 
  -2 -11   6    0.02    0.25 
  -1 -11   6    4.63    0.68 
   0 -11   6    1.64    0.35 
   1 -11   6    2.80    0.49 
   2 -11   6    0.50    0.32 
   3 -11   6    6.74    0.64 
   4 -11   6   20.12    0.95 
   5 -11   6    7.64    0.68 
   6 -11   6    2.68    0.47 
   7 -11   6   10.43    0.60 
   8 -11   6   12.51    0.65 
   9 -11   6    0.38    0.18 
  10 -11   6    0.65    0.19 
  11 -11   6    1.82    0.27 
  12 -11   6    2.20    0.34 
  13 -11   6    0.99    0.21 
  -4 -10   6    0.33    0.25 
  -3 -10   6   -0.03    0.28 
  -2 -10   6    2.05    0.25 
  -1 -10   6    0.87    0.23 
   0 -10   6    2.72    0.48 
   1 -10   6    0.12    0.31 
   2 -10   6    0.41    0.31 
   3 -10   6    0.94    0.30 
   4 -10   6    3.46    0.44 
   5 -10   6    7.11    0.59 
   6 -10   6   11.22    0.73 
   7 -10   6    1.85    0.32 
   8 -10   6    5.06    0.48 
   9 -10   6    1.36    0.37 
  10 -10   6    2.55    0.43 
  11 -10   6    2.92    0.42 
  12 -10   6    3.55    0.30 
  13 -10   6    0.35    0.14 
  14 -10   6    0.12    0.15 
  15 -10   6    0.52    0.12 
  -5  -9   6    0.04    0.25 
  -4  -9   6   -0.23    0.29 
  -3  -9   6    1.85    0.25 
  -2  -9   6   -0.13    0.20 
  -1  -9   6    1.97    0.27 
   0  -9   6    6.31    0.61 
   1  -9   6    6.04    0.56 
   2  -9   6    2.33    0.35 
   3  -9   6    8.94    0.64 
   4  -9   6    1.69    0.29 
   5  -9   6    2.86    0.36 
   6  -9   6    6.48    0.51 
   7  -9   6   12.89    0.76 
   8  -9   6    4.61    0.46 
   9  -9   6    7.59    0.61 
  10  -9   6   -0.18    0.25 
  11  -9   6    0.55    0.14 
  12  -9   6    6.45    0.56 
  13  -9   6   14.75    0.72 
  14  -9   6    1.10    0.19 
  15  -9   6    0.11    0.11 
  -6  -8   6    0.53    0.28 
  -5  -8   6    0.32    0.33 
  -4  -8   6    4.35    0.44 
  -3  -8   6   11.19    0.74 
  -2  -8   6    3.84    0.46 
  -1  -8   6    4.45    0.46 
   0  -8   6   13.71    0.87 
   1  -8   6    2.59    0.37 
   2  -8   6   19.21    0.97 
   3  -8   6    2.38    0.30 
   4  -8   6   22.74    1.08 
   5  -8   6    8.89    0.54 
   6  -8   6    3.16    0.31 
   7  -8   6   21.05    1.07 
   8  -8   6   13.46    0.82 
   9  -8   6    6.66    0.41 
  10  -8   6    0.21    0.18 
  11  -8   6    5.90    0.41 
  12  -8   6   15.50    0.78 
  13  -8   6    3.94    0.30 
  14  -8   6    1.76    0.19 
  15  -8   6    0.29    0.12 
  -6  -7   6    1.38    0.37 
  -5  -7   6   16.58    0.95 
  -4  -7   6   13.18    0.68 
  -3  -7   6    1.00    0.29 
  -2  -7   6   11.41    0.78 
  -1  -7   6   17.71    1.11 
   0  -7   6    9.56    0.59 
   1  -7   6    8.19    0.53 
   2  -7   6    8.36    0.53 
   3  -7   6   14.49    0.74 
   4  -7   6    0.69    0.17 
   5  -7   6   15.08    0.75 
   6  -7   6    0.97    0.20 
   7  -7   6    9.84    0.44 
   8  -7   6    2.63    0.25 
   9  -7   6    2.66    0.34 
  10  -7   6    1.42    0.27 
  11  -7   6   19.20    0.90 
  12  -7   6   23.79    1.12 
  13  -7   6    0.26    0.14 
  14  -7   6    0.02    0.11 
  15  -7   6    1.38    0.19 
  -7  -6   6    0.32    0.31 
  -6  -6   6    7.93    0.93 
  -5  -6   6    1.71    0.26 
  -4  -6   6   10.79    0.84 
  -3  -6   6    7.26    0.55 
  -2  -6   6    3.14    0.34 
  -1  -6   6    1.01    0.20 
   0  -6   6    8.04    0.53 
   1  -6   6    0.17    0.15 
   2  -6   6    8.52    0.48 
   3  -6   6    1.03    0.16 
   4  -6   6    0.85    0.17 
   5  -6   6    2.94    0.24 
   6  -6   6    9.48    0.49 
   7  -6   6    8.65    0.39 
   8  -6   6   19.93    0.98 
   9  -6   6    9.95    0.58 
  10  -6   6    4.44    0.40 
  11  -6   6    6.78    0.43 
  12  -6   6    8.00    0.46 
  13  -6   6    1.67    0.18 
  14  -6   6    0.66    0.12 
  15  -6   6    5.38    0.39 
  -7  -5   6   24.26    2.15 
  -6  -5   6    5.31    0.85 
  -5  -5   6    8.04    0.64 
  -4  -5   6    2.61    0.38 
  -3  -5   6    9.39    0.61 
  -2  -5   6   15.05    0.80 
  -1  -5   6    2.74    0.26 
   0  -5   6    6.10    0.43 
   1  -5   6   25.02    1.44 
   2  -5   6    0.49    0.30 
   3  -5   6   23.78    1.31 
   4  -5   6   63.90    3.24 
   5  -5   6    7.04    0.38 
   6  -5   6    0.17    0.16 
   7  -5   6    8.90    0.48 
   8  -5   6    3.12    0.29 
   9  -5   6    1.92    0.25 
  10  -5   6    7.42    0.52 
  11  -5   6    2.50    0.24 
  12  -5   6   16.09    0.67 
  13  -5   6    1.09    0.13 
  14  -5   6    0.02    0.11 
  15  -5   6    4.86    0.27 
  -8  -4   6   20.44    1.53 
  -7  -4   6   16.21    1.72 
  -5  -4   6    2.15    0.34 
  -4  -4   6   23.01    1.55 
  -3  -4   6    0.69    0.18 
  -2  -4   6    1.12    0.17 
  -1  -4   6   52.36    3.31 
   0  -4   6   10.73    0.78 
   1  -4   6   16.45    0.97 
   2  -4   6  122.15    5.97 
   3  -4   6   62.66    2.99 
   4  -4   6    9.23    0.63 
   5  -4   6   23.97    1.30 
   6  -4   6    8.13    0.43 
   7  -4   6   14.88    0.89 
   8  -4   6   23.39    1.13 
   9  -4   6    3.12    0.32 
  10  -4   6   10.74    0.65 
  11  -4   6    9.40    0.47 
  12  -4   6    6.06    0.31 
  13  -4   6   -0.01    0.10 
  14  -4   6    0.22    0.11 
  15  -4   6    0.63    0.12 
  -5  -3   6    4.15    0.37 
  -4  -3   6   15.06    1.02 
  -3  -3   6    1.12    0.44 
  -2  -3   6   20.42    1.38 
  -1  -3   6   52.63    3.05 
   0  -3   6   68.83    3.49 
   1  -3   6   18.55    1.03 
   2  -3   6    0.62    0.17 
   3  -3   6   68.45    3.43 
   4  -3   6   15.69    0.86 
   5  -3   6    1.24    0.20 
   6  -3   6    0.65    0.21 
   7  -3   6    0.62    0.24 
   8  -3   6    8.74    0.54 
   9  -3   6    6.59    0.46 
  10  -3   6    1.82    0.25 
  11  -3   6   12.52    0.52 
  12  -3   6    1.65    0.16 
  13  -3   6    0.05    0.13 
  14  -3   6    0.79    0.17 
  -3  -2   6    0.69    0.36 
  -2  -2   6  103.17    5.98 
  -1  -2   6    0.61    0.25 
   0  -2   6  115.78    5.54 
   1  -2   6   24.28    1.26 
   2  -2   6  112.00    5.51 
   3  -2   6   20.61    0.98 
   4  -2   6  124.91    5.91 
   5  -2   6   24.44    1.22 
   6  -2   6    1.03    0.22 
   7  -2   6   16.43    0.92 
   8  -2   6    3.14    0.31 
   9  -2   6   12.90    0.68 
  10  -2   6    4.54    0.26 
  11  -2   6   -0.01    0.13 
  12  -2   6    1.74    0.19 
  13  -2   6    0.19    0.19 
  14  -2   6    0.24    0.13 
  -3  -1   6   14.36    1.47 
  -2  -1   6   15.23    1.61 
  -1  -1   6   23.32    2.00 
   0  -1   6    5.95    0.65 
   1  -1   6    7.23    0.65 
   2  -1   6   23.96    1.23 
   3  -1   6    0.69    0.13 
   4  -1   6   58.49    2.94 
   5  -1   6   63.65    3.18 
   6  -1   6    2.24    0.30 
   7  -1   6    1.33    0.17 
   8  -1   6   20.96    1.00 
   9  -1   6    4.03    0.36 
  10  -1   6    1.58    0.32 
  11  -1   6    0.59    0.28 
  12  -1   6    6.66    0.56 
  13  -1   6    0.42    0.18 
  -2   0   6   93.20    8.66 
  -1   0   6    7.23    0.61 
   0   0   6  244.76   19.23 
   1   0   6    7.10    0.61 
   2   0   6  111.40    5.50 
   3   0   6   68.46    3.41 
   4   0   6   10.14    0.59 
   5   0   6    7.18    0.46 
   6   0   6    9.46    0.58 
   7   0   6    8.86    0.47 
   8   0   6   14.11    1.14 
   9   0   6    7.77    0.52 
  10   0   6    2.76    0.48 
  11   0   6    1.63    0.31 
  12   0   6    1.41    0.24 
  13   0   6    0.63    0.15 
  -1   1   6    7.37    0.58 
   0   1   6    6.15    0.59 
   1   1   6   23.36    1.23 
   2   1   6   20.23    0.97 
   3   1   6   16.62    0.84 
   4   1   6   24.18    1.26 
   5   1   6    0.18    0.18 
   6   1   6    8.38    0.56 
   7   1   6    2.41    0.32 
   8   1   6    6.67    0.73 
   9   1   6    0.20    0.28 
  10   1   6    2.65    0.47 
  11   1   6    1.44    0.28 
  12   1   6    1.81    0.29 
  -2   2   6  103.30    8.62 
  -1   2   6   23.56    1.92 
   0   2   6  112.43    5.49 
   1   2   6    0.93    0.12 
   2   2   6  126.68    5.91 
   3   2   6    1.05    0.18 
   4   2   6    8.63    0.52 
   5   2   6    9.89    0.58 
   6   2   6   19.19    1.07 
   7   2   6    2.69    0.44 
   8   2   6    0.11    0.34 
   9   2   6    0.60    0.28 
  10   2   6    4.36    0.48 
  11   2   6    1.08    0.21 
  12   2   6    0.25    0.13 
 -11   3   6   11.79    0.77 
  -3   3   6   64.06    5.32 
  -2   3   6    0.50    0.13 
  -1   3   6   16.96    0.95 
   0   3   6   69.80    3.41 
   1   3   6   56.86    2.94 
   2   3   6   24.83    1.20 
   3   3   6    0.89    0.17 
   4   3   6   15.20    0.83 
   5   3   6    3.18    0.35 
   6   3   6    8.83    0.80 
   7   3   6    1.40    0.37 
   9   3   6    5.52    0.59 
  10   3   6    0.72    0.22 
  11   3   6    0.30    0.14 
 -12   4   6    5.79    0.41 
  -3   4   6   60.56    4.59 
  -2   4   6  120.26    9.28 
  -1   4   6   15.27    0.83 
   0   4   6   11.47    0.59 
   1   4   6   64.41    3.17 
   2   4   6    1.24    0.19 
   3   4   6    0.31    0.16 
   4   4   6   22.08    1.23 
   5   4   6    1.86    0.36 
   6   4   6    4.28    0.53 
   8   4   6   18.15    1.18 
   9   4   6   15.29    1.07 
  10   4   6    0.28    0.15 
 -13   5   6    1.16    0.16 
  -3   5   6   23.66    1.86 
  -2   5   6    0.56    0.20 
  -1   5   6   22.91    1.25 
   0   5   6    6.10    0.43 
   1   5   6    2.92    0.27 
   2   5   6   15.93    0.87 
   3   5   6    8.88    0.58 
   4   5   6    2.50    0.43 
   5   5   6    8.13    0.71 
  -3   6   6    0.83    0.23 
  -2   6   6    8.30    0.50 
  -1   6   6    0.02    0.14 
   0   6   6    7.82    0.54 
   1   6   6    0.48    0.18 
   2   6   6    3.69    0.34 
   3   6   6    6.77    0.64 
   4   6   6    9.64    0.88 
 -14   7   6    0.06    0.13 
  -3   7   6   15.11    1.29 
  -2   7   6    8.54    0.54 
  -1   7   6    8.20    0.54 
   0   7   6    9.26    0.60 
   1   7   6   17.66    1.41 
   2   7   6   10.29    0.93 
   3   7   6    1.19    0.35 
  -3   8   6    2.18    0.31 
  -2   8   6   18.56    1.05 
  -1   8   6    3.01    0.45 
   0   8   6   14.10    1.08 
   1   8   6    4.15    0.55 
   2   8   6    4.11    0.56 
 -15   9   6   -0.01    0.10 
  -3   9   6    8.76    0.78 
  -2   9   6    2.70    0.44 
  -1   9   6    6.30    0.65 
   0   9   6    6.05    0.69 
  -2  10   6    0.13    0.29 
   7 -15   7    1.54    0.25 
   8 -15   7   10.13    0.64 
   9 -15   7    5.10    0.38 
  10 -15   7    0.46    0.15 
   6 -14   7    1.15    0.21 
   7 -14   7    1.09    0.23 
   8 -14   7   17.41    1.14 
   9 -14   7   10.10    0.72 
  10 -14   7    2.01    0.31 
  11 -14   7    0.63    0.17 
  12 -14   7    4.62    0.36 
   5 -13   7   15.14    1.12 
   6 -13   7    9.27    0.72 
   7 -13   7    1.33    0.26 
   8 -13   7    0.74    0.23 
   9 -13   7    0.18    0.22 
  10 -13   7    0.65    0.22 
  11 -13   7    3.68    0.39 
  12 -13   7    0.28    0.17 
  13 -13   7    0.14    0.14 
   2 -12   7    1.37    0.33 
   3 -12   7   20.20    1.73 
   4 -12   7   71.13    3.18 
   5 -12   7   19.12    0.89 
   6 -12   7    0.45    0.19 
   7 -12   7    1.49    0.21 
   8 -12   7    5.13    0.36 
   9 -12   7    0.51    0.18 
  10 -12   7    2.93    0.29 
  11 -12   7    2.30    0.37 
  12 -12   7    4.37    0.42 
  13 -12   7    0.22    0.16 
  -2 -11   7    3.46    0.54 
  -1 -11   7    3.11    0.51 
   0 -11   7   15.38    1.22 
   1 -11   7    3.53    0.50 
   2 -11   7   11.03    0.96 
   3 -11   7    1.48    0.23 
   4 -11   7   21.37    1.17 
   5 -11   7   27.36    1.32 
   6 -11   7   23.92    1.13 
   7 -11   7   29.25    1.34 
   8 -11   7    0.89    0.20 
   9 -11   7    4.34    0.36 
  10 -11   7    9.69    0.79 
  11 -11   7   16.28    1.15 
  12 -11   7    0.31    0.20 
  13 -11   7    2.77    0.34 
  -3 -10   7    1.18    0.32 
  -2 -10   7    2.24    0.30 
  -1 -10   7   10.54    0.67 
   0 -10   7    3.75    0.52 
   1 -10   7    8.67    0.76 
   2 -10   7   24.96    1.82 
   3 -10   7   18.12    1.09 
   4 -10   7    4.79    0.48 
   5 -10   7   39.18    1.98 
   6 -10   7    4.59    0.52 
   7 -10   7   59.58    2.90 
   8 -10   7    0.22    0.32 
   9 -10   7   44.39    2.17 
  10 -10   7    4.09    0.48 
  11 -10   7    3.85    0.43 
  12 -10   7    1.76    0.20 
  13 -10   7    0.58    0.14 
  14 -10   7    4.08    0.37 
  15 -10   7    0.15    0.11 
  -4  -9   7    0.00    0.30 
  -3  -9   7    0.22    0.19 
  -2  -9   7    3.29    0.37 
  -1  -9   7   45.18    2.46 
   0  -9   7   21.76    1.27 
   1  -9   7    7.85    0.67 
   2  -9   7   12.50    0.85 
   3  -9   7    0.57    0.24 
   4  -9   7    7.06    0.52 
   5  -9   7   37.26    2.00 
   6  -9   7   61.04    2.94 
   7  -9   7   32.90    1.69 
   8  -9   7    3.06    0.41 
   9  -9   7   21.39    1.21 
  10  -9   7    7.98    0.48 
  11  -9   7   11.96    0.63 
  12  -9   7   23.70    1.14 
  13  -9   7    1.10    0.16 
  14  -9   7   13.53    0.87 
  15  -9   7    0.75    0.13 
  -5  -8   7    0.64    0.33 
  -4  -8   7    5.11    0.40 
  -3  -8   7    1.34    0.24 
  -2  -8   7    0.88    0.23 
  -1  -8   7    2.78    0.42 
   0  -8   7    3.07    0.43 
   1  -8   7    4.53    0.46 
   2  -8   7   24.27    1.41 
   3  -8   7    5.74    0.42 
   4  -8   7    4.82    0.39 
   5  -8   7    0.95    0.23 
   6  -8   7   43.49    1.82 
   7  -8   7   12.95    0.78 
   8  -8   7    4.75    0.44 
   9  -8   7    9.54    0.60 
  10  -8   7   24.76    1.20 
  11  -8   7    1.72    0.23 
  12  -8   7   69.84    3.03 
  13  -8   7   16.52    0.77 
  14  -8   7    1.02    0.14 
  15  -8   7    1.75    0.21 
  -6  -7   7    1.21    0.36 
  -5  -7   7    0.69    0.38 
  -4  -7   7   25.35    1.50 
  -3  -7   7   59.62    3.94 
  -2  -7   7   33.84    1.75 
  -1  -7   7   14.05    0.85 
   0  -7   7   35.17    1.71 
   1  -7   7   39.28    1.81 
   2  -7   7    3.41    0.31 
   3  -7   7    3.97    0.32 
   4  -7   7   13.73    0.68 
   5  -7   7    4.99    0.36 
   6  -7   7    1.51    0.22 
   7  -7   7   36.36    1.32 
   8  -7   7    5.15    0.34 
   9  -7   7   13.72    0.77 
  10  -7   7   18.76    1.01 
  11  -7   7   23.89    1.12 
  12  -7   7   19.07    0.84 
  13  -7   7    9.71    0.50 
  14  -7   7    1.24    0.14 
  15  -7   7    9.40    0.58 
  -7  -6   7    8.52    0.96 
  -6  -6   7    0.62    0.36 
  -5  -6   7   22.81    2.08 
  -4  -6   7    3.94    0.48 
  -3  -6   7   61.07    4.02 
  -2  -6   7   39.75    1.85 
  -1  -6   7    1.32    0.22 
   0  -6   7   14.84    0.78 
   1  -6   7    1.72    0.24 
   2  -6   7    3.16    0.29 
   3  -6   7   44.39    1.94 
   4  -6   7   77.41    3.13 
   5  -6   7   16.24    0.72 
   6  -6   7   15.47    0.73 
   7  -6   7   41.53    1.47 
   8  -6   7   28.29    1.18 
   9  -6   7    0.04    0.21 
  10  -6   7    4.75    0.41 
  11  -6   7   27.45    1.26 
  12  -6   7    0.60    0.18 
  13  -6   7    1.21    0.17 
  14  -6   7   16.72    1.06 
  15  -6   7    4.81    0.32 
  -7  -5   7   13.77    1.62 
  -6  -5   7   28.32    2.43 
  -4  -5   7   41.81    2.67 
  -3  -5   7    2.24    0.32 
  -2  -5   7    4.84    0.38 
  -1  -5   7   13.69    0.77 
   0  -5   7   15.28    0.76 
   1  -5   7    2.06    0.44 
   2  -5   7  133.52    6.74 
   3  -5   7   39.43    1.94 
   4  -5   7   44.25    1.88 
   5  -5   7   16.31    0.71 
   6  -5   7    2.09    0.22 
   7  -5   7    3.66    0.27 
   8  -5   7    5.73    0.39 
   9  -5   7    6.72    0.47 
  10  -5   7   39.59    1.87 
  11  -5   7   23.26    1.08 
  12  -5   7    1.69    0.17 
  13  -5   7    0.47    0.12 
  14  -5   7    9.60    0.49 
  15  -5   7    0.19    0.08 
  -7  -4   7   26.35    2.16 
  -3  -4   7   13.66    0.79 
  -2  -4   7   73.14    3.16 
  -1  -4   7   42.77    2.51 
   0  -4   7  174.94    9.59 
   1  -4   7   14.37    0.85 
   2  -4   7  107.57    5.52 
   3  -4   7   99.85    4.99 
   4  -4   7  200.50    9.53 
   5  -4   7    1.87    0.20 
   6  -4   7    3.94    0.29 
   7  -4   7    3.90    0.42 
   8  -4   7    5.10    0.34 
   9  -4   7   40.56    1.91 
  10  -4   7    5.12    0.41 
  11  -4   7   27.65    1.06 
  12  -4   7    3.79    0.27 
  13  -4   7    0.28    0.11 
  14  -4   7    1.79    0.18 
  -2  -3   7   30.81    1.97 
  -1  -3   7   92.04    5.04 
   0  -3   7   49.00    2.64 
   1  -3   7  239.84   11.43 
   2  -3   7   33.97    1.74 
   3  -3   7   55.26    2.59 
   4  -3   7   11.92    0.74 
   5  -3   7  133.99    6.66 
   6  -3   7   48.90    2.41 
   7  -3   7   13.42    0.82 
   8  -3   7    1.57    0.21 
   9  -3   7   62.76    2.83 
  10  -3   7   59.27    2.79 
  11  -3   7    1.50    0.16 
  12  -3   7    0.28    0.13 
  13  -3   7    0.83    0.14 
  14  -3   7    0.45    0.15 
  -2  -2   7   98.05    5.54 
  -1  -2   7   32.56    1.78 
   0  -2   7   23.01    1.22 
   1  -2   7   14.94    0.81 
   2  -2   7   24.71    1.19 
   3  -2   7  233.99   11.39 
   4  -2   7  113.10    5.47 
   5  -2   7   36.98    1.85 
   6  -2   7   81.66    6.16 
   7  -2   7    5.47    0.32 
   8  -2   7   42.61    1.73 
   9  -2   7   33.51    1.60 
  10  -2   7    1.26    0.16 
  11  -2   7    4.62    0.28 
  12  -2   7    3.12    0.28 
  13  -2   7    4.03    0.41 
  14  -2   7    4.16    0.36 
  -2  -1   7  189.57   17.97 
  -1  -1   7   15.05    1.31 
   0  -1   7  189.58   14.51 
   1  -1   7  180.49    9.20 
   2  -1   7   14.41    0.79 
   3  -1   7   33.77    1.71 
   4  -1   7  100.60    4.95 
   5  -1   7   49.82    2.36 
   6  -1   7   15.55    0.88 
   7  -1   7    1.29    0.18 
   8  -1   7   12.54    0.71 
   9  -1   7    3.32    0.55 
  10  -1   7   48.11    2.10 
  11  -1   7   10.64    0.85 
  12  -1   7    2.27    0.40 
  13  -1   7    0.73    0.18 
  -2   0   7   20.70    1.86 
  -1   0   7  183.90   14.48 
   0   0   7    0.14    0.15 
   1   0   7  178.55    9.19 
   2   0   7   23.12    1.17 
   3   0   7   51.18    2.56 
   4   0   7  198.22    9.49 
   5   0   7   15.50    0.87 
   6   0   7   16.51    0.90 
   7   0   7   36.78    1.51 
   8   0   7    3.82    0.60 
   9   0   7   21.02    1.64 
  10   0   7    5.61    0.56 
  11   0   7   19.05    1.24 
  12   0   7    4.84    0.46 
  13   0   7    0.02    0.13 
  -2   1   7   14.42    1.20 
  -1   1   7  181.98   14.47 
   0   1   7  183.45   14.48 
   1   1   7   15.60    0.79 
   2   1   7  235.36   11.38 
   3   1   7   13.03    0.72 
   4   1   7    1.92    0.24 
   5   1   7    2.30    0.28 
   6   1   7   43.62    2.17 
   7   1   7    5.50    0.64 
   8   1   7    9.07    0.86 
  10   1   7    3.25    0.51 
  11   1   7    0.41    0.24 
  12   1   7    0.48    0.17 
  -2   2   7   22.50    1.80 
  -1   2   7   14.79    1.22 
   0   2   7   21.31    1.16 
   1   2   7   34.22    1.70 
   2   2   7  118.83    5.47 
   3   2   7  138.08    6.64 
   4   2   7    3.87    0.33 
   5   2   7    3.26    0.35 
   6   2   7   28.16    1.88 
   7   2   7   13.29    1.07 
   9   2   7   11.77    0.96 
  10   2   7    1.18    0.28 
  11   2   7    2.59    0.35 
  12   2   7    1.68    0.24 
 -11   3   7    1.22    0.18 
  -2   3   7   32.35    2.65 
  -1   3   7  223.26   11.36 
   0   3   7   46.26    2.55 
   1   3   7  103.36    4.94 
   2   3   7   36.05    1.83 
   3   3   7   48.29    2.38 
   4   3   7    3.82    0.36 
   5   3   7    6.20    0.46 
   6   3   7    0.07    0.29 
   7   3   7   17.43    1.37 
   9   3   7   26.92    1.71 
  10   3   7    0.51    0.22 
  11   3   7    0.09    0.14 
 -12   4   7    4.08    0.36 
  -2   4   7  104.67    5.45 
  -1   4   7   13.78    0.71 
   0   4   7  185.16    9.48 
   1   4   7   48.98    2.34 
   2   4   7   80.04    3.88 
   3   4   7   13.09    0.77 
   4   4   7    5.47    0.42 
   5   4   7    6.48    0.65 
   6   4   7    4.10    0.58 
   8   4   7   65.91    4.54 
   9   4   7    2.29    0.35 
  10   4   7    4.92    0.40 
  -3   5   7   39.42    2.86 
  -2   5   7  128.12    6.62 
  -1   5   7    2.27    0.23 
   0   5   7   15.56    0.85 
   1   5   7   13.76    0.83 
   2   5   7    5.15    0.39 
   3   5   7    1.90    0.25 
   4   5   7   38.63    2.69 
   5   5   7   35.61    2.62 
  -3   6   7   47.74    3.73 
  -2   6   7    2.80    0.28 
  -1   6   7    2.12    0.25 
   0   6   7   15.78    0.86 
   1   6   7    1.07    0.20 
   2   6   7   42.67    2.81 
   3   6   7   55.51    4.01 
   4   6   7    3.13    0.53 
 -14   7   7    1.52    0.22 
  -2   7   7    3.39    0.32 
  -1   7   7   42.63    2.78 
   0   7   7   36.55    1.92 
   1   7   7   13.55    1.03 
   2   7   7   32.22    2.27 
   3   7   7   55.29    3.94 
  -2   8   7   25.16    1.42 
  -1   8   7    5.38    0.57 
   0   8   7    3.88    0.50 
   1   8   7    2.55    0.44 
 -15   9   7    0.83    0.11 
  -2   9   7   13.88    1.06 
  -1   9   7    8.64    0.79 
   0   9   7   21.66    1.58 
 -15  10   7    0.19    0.09 
   7 -15   8   -0.11    0.13 
   8 -15   8    0.07    0.14 
   9 -15   8    2.31    0.29 
  10 -15   8    0.14    0.14 
   6 -14   8   -0.02    0.17 
   7 -14   8    8.93    0.66 
   8 -14   8    1.54    0.24 
   9 -14   8    1.21    0.22 
  10 -14   8    0.21    0.18 
  11 -14   8   -0.05    0.15 
  12 -14   8    0.57    0.14 
   4 -13   8   17.38    1.21 
   5 -13   8    9.57    0.68 
   6 -13   8    2.45    0.38 
   7 -13   8    0.64    0.23 
   8 -13   8    1.15    0.25 
   9 -13   8    0.20    0.22 
  10 -13   8    3.64    0.40 
  11 -13   8    0.37    0.18 
  12 -13   8    0.39    0.17 
  13 -13   8    0.16    0.13 
   3 -12   8   19.74    1.40 
   5 -12   8   25.91    1.31 
   6 -12   8    3.44    0.34 
   7 -12   8    9.65    0.54 
   8 -12   8    4.89    0.36 
   9 -12   8    2.35    0.28 
  10 -12   8    2.64    0.36 
  11 -12   8    3.48    0.40 
  12 -12   8    1.79    0.30 
  13 -12   8    2.76    0.32 
  -1 -11   8    2.65    0.54 
   0 -11   8    8.19    0.67 
   1 -11   8    5.85    0.60 
   2 -11   8    2.77    0.54 
   3 -11   8   59.40    2.90 
   4 -11   8   25.05    1.11 
   5 -11   8    4.21    0.36 
   6 -11   8    0.98    0.21 
   7 -11   8   13.38    0.70 
   8 -11   8   17.84    0.89 
   9 -11   8   15.82    0.85 
  10 -11   8    6.14    0.56 
  11 -11   8    7.25    0.60 
  12 -11   8    7.40    0.59 
  -3 -10   8    3.26    0.55 
  -2 -10   8    2.30    0.40 
  -1 -10   8    5.12    0.47 
   0 -10   8    9.36    0.81 
   1 -10   8   10.33    0.94 
   2 -10   8   10.91    0.85 
   3 -10   8    0.66    0.30 
   4 -10   8    2.06    0.34 
   5 -10   8    3.95    0.45 
   6 -10   8   88.49    4.38 
   7 -10   8    1.22    0.32 
   8 -10   8   42.81    2.83 
   9 -10   8    1.33    0.21 
  10 -10   8    9.25    0.74 
  11 -10   8    5.81    0.53 
  12 -10   8    2.36    0.37 
  13 -10   8    0.31    0.13 
  14 -10   8    2.77    0.28 
  15 -10   8    0.01    0.09 
  -4  -9   8    0.13    0.30 
  -3  -9   8    1.97    0.41 
  -2  -9   8   17.78    0.97 
  -1  -9   8    1.63    0.26 
   0  -9   8    3.27    0.51 
   1  -9   8    3.20    0.45 
   2  -9   8    0.43    0.27 
   3  -9   8    3.10    0.40 
   4  -9   8   22.76    1.32 
   5  -9   8   11.84    0.73 
   6  -9   8   20.29    1.15 
   7  -9   8    2.67    0.38 
   8  -9   8   45.31    2.29 
   9  -9   8    3.50    0.60 
  10  -9   8   11.09    0.62 
  11  -9   8    4.12    0.51 
  12  -9   8   19.32    0.92 
  13  -9   8   17.13    0.83 
  14  -9   8    0.56    0.16 
  15  -9   8    0.34    0.12 
  -5  -8   8    0.48    0.33 
  -3  -8   8   16.05    0.99 
  -2  -8   8   41.01    2.21 
  -1  -8   8   45.27    2.36 
   0  -8   8   10.43    0.69 
   1  -8   8    8.15    0.62 
   2  -8   8    0.29    0.22 
   3  -8   8    0.41    0.21 
   4  -8   8    0.67    0.21 
   5  -8   8   32.70    1.67 
   6  -8   8    1.87    0.29 
   7  -8   8    4.84    0.45 
   8  -8   8    9.14    0.64 
   9  -8   8    4.12    0.40 
  10  -8   8   10.01    0.56 
  11  -8   8   61.93    2.78 
  13  -8   8    9.29    0.47 
  14  -8   8    0.16    0.16 
  15  -8   8    0.15    0.11 
  -6  -7   8    0.80    0.33 
  -5  -7   8    8.59    1.00 
  -4  -7   8   17.07    1.34 
  -3  -7   8    2.92    0.43 
  -2  -7   8    2.33    0.41 
  -1  -7   8    4.54    0.45 
   0  -7   8    1.00    0.23 
   1  -7   8   15.23    0.86 
   2  -7   8    7.09    0.49 
   3  -7   8    5.65    0.40 
   4  -7   8    7.54    0.48 
   5  -7   8    1.12    0.20 
   6  -7   8    2.52    0.29 
   7  -7   8    0.75    0.23 
   8  -7   8    8.58    0.46 
   9  -7   8    0.41    0.22 
  10  -7   8    0.54    0.19 
  11  -7   8   23.37    1.06 
  12  -7   8   26.44    1.25 
  13  -7   8    2.72    0.26 
  14  -7   8    8.95    0.61 
  15  -7   8    0.24    0.11 
  -6  -6   8    3.55    0.66 
  -5  -6   8    0.62    0.38 
  -3  -6   8   22.29    1.47 
  -2  -6   8    2.83    0.34 
  -1  -6   8    2.92    0.31 
   0  -6   8    3.14    0.29 
   1  -6   8    1.02    0.19 
   2  -6   8   34.04    1.54 
   3  -6   8   58.48    2.44 
   4  -6   8    1.04    0.18 
   5  -6   8   14.46    0.75 
   6  -6   8    3.27    0.30 
   7  -6   8   17.42    0.66 
   8  -6   8    0.45    0.20 
   9  -6   8    3.33    0.36 
  10  -6   8    1.82    0.29 
  11  -6   8    4.44    0.34 
  12  -6   8    3.26    0.31 
  13  -6   8    0.48    0.15 
  14  -6   8    1.37    0.20 
  15  -6   8    2.48    0.23 
  -7  -5   8   29.64    2.41 
  -6  -5   8    2.60    0.53 
  -3  -5   8   35.18    2.24 
  -2  -5   8    1.35    0.21 
  -1  -5   8   16.69    0.81 
   0  -5   8    1.21    0.21 
   1  -5   8   94.16    4.89 
   2  -5   8    4.54    0.55 
   3  -5   8   36.97    2.12 
   4  -5   8   87.16    3.44 
   5  -5   8    1.64    0.19 
   6  -5   8    0.81    0.18 
   7  -5   8    7.73    0.44 
   8  -5   8    0.03    0.18 
   9  -5   8   25.57    1.25 
  10  -5   8    4.32    0.42 
  11  -5   8    1.08    0.19 
  12  -5   8    9.19    0.50 
  13  -5   8    1.26    0.13 
  14  -5   8    0.89    0.13 
  15  -5   8    0.21    0.09 
  -7  -4   8   17.31    2.01 
  -2  -4   8    0.89    0.45 
  -1  -4   8   78.16    4.44 
   0  -4   8    8.03    0.71 
   1  -4   8  250.74   13.06 
   2  -4   8  172.54    8.50 
   3  -4   8   32.15    1.53 
   4  -4   8    6.65    0.55 
   5  -4   8   96.44    3.79 
   6  -4   8   37.38    1.91 
   7  -4   8    5.82    0.35 
   8  -4   8    0.75    0.18 
   9  -4   8   11.89    0.66 
  10  -4   8   93.26    4.25 
  11  -4   8   11.58    0.55 
  12  -4   8    4.99    0.28 
  13  -4   8    0.17    0.11 
  14  -4   8    0.38    0.10 
  -2  -3   8   35.21    2.19 
  -1  -3   8   26.26    1.59 
   0  -3   8   98.54    5.25 
   1  -3   8   38.28    2.15 
   2  -3   8    3.41    0.30 
   3  -3   8  106.93    5.21 
   4  -3   8  268.37   13.01 
   5  -3   8    6.99    0.46 
   6  -3   8   61.88    3.04 
   7  -3   8    7.78    0.42 
   8  -3   8   32.68    1.39 
   9  -3   8   20.17    1.07 
  10  -3   8    2.07    0.17 
  11  -3   8   18.13    0.70 
  12  -3   8    2.00    0.17 
  13  -3   8    3.52    0.27 
  14  -3   8    0.06    0.08 
  -2  -2   8  143.38   13.40 
  -1  -2   8    2.29    0.32 
   0  -2   8  102.86    5.19 
   1  -2   8    1.51    0.20 
   2  -2   8  104.60    5.17 
   3  -2   8   44.66    2.12 
   4  -2   8  170.31    8.45 
   5  -2   8   41.80    2.06 
   6  -2   8    1.06    0.24 
   7  -2   8    1.42    0.19 
   8  -2   8    2.14    0.23 
   9  -2   8    2.15    0.50 
  10  -2   8   40.09    1.55 
  11  -2   8   16.38    0.67 
  12  -2   8    2.14    0.22 
  13  -2   8    0.28    0.18 
  14  -2   8    0.73    0.13 
  -2  -1   8   37.33    3.38 
  -1  -1   8    1.34    0.31 
   0  -1   8    6.91    0.66 
   1  -1   8    6.73    0.40 
   2  -1   8    1.48    0.18 
   3  -1   8    2.57    0.23 
   4  -1   8   28.59    1.47 
   5  -1   8   88.30    4.31 
   6  -1   8   17.87    0.94 
   7  -1   8    2.53    0.24 
   8  -1   8    5.46    0.38 
   9  -1   8   46.04    2.20 
  10  -1   8    1.60    0.21 
  11  -1   8    7.76    0.43 
  12  -1   8    4.34    0.45 
  13  -1   8    0.50    0.17 
  -2   0   8   98.53    8.12 
  -1   0   8    6.46    0.62 
   0   0   8  612.78   48.15 
   1   0   8    6.65    0.39 
   2   0   8  104.76    5.15 
   3   0   8  105.67    5.19 
   4   0   8    8.21    0.51 
   5   0   8    1.25    0.22 
   6   0   8    2.76    0.37 
   7   0   8    1.10    0.18 
   8   0   8    8.88    0.57 
  10   0   8    8.41    0.82 
  11   0   8    7.46    0.69 
  12   0   8    2.08    0.34 
  13   0   8    0.12    0.12 
  -2   1   8    1.22    0.21 
  -1   1   8    6.36    0.59 
   0   1   8    6.77    0.60 
   1   1   8    1.28    0.15 
   2   1   8   43.88    2.10 
   3   1   8  273.15   12.99 
   4   1   8   97.16    4.76 
   5   1   8    1.12    0.23 
   6   1   8   17.10    0.97 
   7   1   8    8.88    0.84 
   8   1   8    3.98    0.60 
  10   1   8    6.23    0.62 
  11   1   8    8.98    0.65 
  12   1   8    3.36    0.34 
  -2   2   8  103.64    8.07 
  -1   2   8    1.15    0.20 
   0   2   8   98.91    5.14 
   1   2   8    2.09    0.21 
   2   2   8  168.72    8.44 
   3   2   8    6.81    0.42 
   4   2   8   38.11    1.87 
   5   2   8    8.61    0.56 
   6   2   8    0.38    0.31 
   7   2   8    0.29    0.34 
   9   2   8    5.62    0.59 
  10   2   8    3.55    0.44 
  11   2   8    0.71    0.19 
  12   2   8    0.41    0.13 
 -11   3   8   17.49    1.07 
  -2   3   8    2.34    0.26 
  -1   3   8   36.22    2.08 
   0   3   8   99.85    5.17 
   1   3   8   26.89    1.45 
   2   3   8   41.47    2.04 
   3   3   8   59.80    3.01 
   4   3   8    6.00    0.44 
   5   3   8    0.06    0.27 
   6   3   8    3.47    0.53 
   7   3   8    0.33    0.32 
   9   3   8   17.72    1.38 
  10   3   8    0.71    0.21 
  11   3   8    0.30    0.14 
  -2   4   8  173.99   13.27 
  -1   4   8  248.72   12.97 
   0   4   8    8.90    0.50 
   1   4   8   84.97    4.29 
   2   4   8    0.65    0.18 
   3   4   8    8.63    0.53 
   4   4   8    0.44    0.21 
   5   4   8   24.24    1.74 
   6   4   8    1.42    0.38 
   9   4   8   19.28    1.24 
  10   4   8    2.48    0.30 
  -2   5   8    4.97    0.59 
  -1   5   8   94.50    4.74 
   0   5   8    1.73    0.21 
   1   5   8   16.76    0.89 
   2   5   8    1.28    0.22 
   3   5   8   31.31    2.24 
   4   5   8   10.35    0.90 
   5   5   8    4.32    0.57 
   8   5   8    7.76    0.70 
 -13   6   8    0.86    0.17 
  -2   6   8   35.38    1.84 
  -1   6   8    1.25    0.20 
   0   6   8    2.61    0.29 
   1   6   8    2.48    0.30 
   2   6   8    2.41    0.38 
   3   6   8   20.48    1.49 
   4   6   8   83.30    6.01 
 -14   7   8    9.58    0.56 
  -2   7   8    8.29    0.52 
  -1   7   8   16.22    0.94 
   0   7   8    0.66    0.20 
   1   7   8    4.15    0.53 
   2   7   8    1.50    0.37 
   3   7   8    2.47    0.41 
  -2   8   8    0.31    0.29 
  -1   8   8    9.31    0.76 
   0   8   8    9.61    0.82 
   1   8   8   46.61    3.13 
  -1   9   8    4.24    0.53 
 -15  10   8    0.08    0.08 
   7 -15   9    0.04    0.13 
   8 -15   9    0.11    0.14 
   9 -15   9    0.92    0.16 
   5 -14   9    0.07    0.16 
   6 -14   9    0.02    0.17 
   7 -14   9    0.40    0.19 
   8 -14   9    2.10    0.31 
   9 -14   9    4.18    0.38 
  10 -14   9    0.26    0.17 
  11 -14   9    2.65    0.28 
  12 -14   9    0.07    0.12 
   4 -13   9    2.45    0.35 
   5 -13   9    0.07    0.21 
   6 -13   9    1.50    0.27 
   7 -13   9    7.90    0.58 
   8 -13   9    1.59    0.26 
   9 -13   9    1.33    0.24 
  10 -13   9    0.75    0.21 
  11 -13   9    0.41    0.18 
  12 -13   9    0.20    0.15 
  13 -13   9    0.64    0.14 
   3 -12   9    2.67    0.30 
   4 -12   9    1.67    0.22 
   5 -12   9    1.01    0.21 
   6 -12   9    2.00    0.23 
   7 -12   9    5.68    0.41 
   8 -12   9   22.62    1.09 
   9 -12   9    1.89    0.25 
  10 -12   9    1.72    0.26 
  11 -12   9    0.66    0.20 
  12 -12   9    0.20    0.17 
  13 -12   9    1.92    0.26 
   1 -11   9    3.58    0.49 
   2 -11   9   11.66    0.97 
   3 -11   9   11.48    0.62 
   4 -11   9    0.48    0.21 
   5 -11   9    6.25    0.43 
   6 -11   9   20.40    0.94 
   7 -11   9    3.17    0.32 
   8 -11   9   12.32    0.68 
   9 -11   9    1.13    0.20 
  10 -11   9    0.01    0.21 
  11 -11   9    1.72    0.25 
  12 -11   9    0.65    0.20 
  -2 -10   9    1.39    0.35 
  -1 -10   9    0.27    0.21 
   0 -10   9    0.03    0.29 
   1 -10   9   11.95    0.98 
   2 -10   9    0.31    0.31 
   3 -10   9   17.36    1.27 
   4 -10   9    6.22    0.52 
   5 -10   9    0.66    0.29 
   6 -10   9    3.50    0.42 
   7 -10   9   13.81    1.02 
   8 -10   9    0.85    0.34 
   9 -10   9    2.43    0.30 
  10 -10   9    0.37    0.22 
  11 -10   9    4.43    0.44 
  14 -10   9    0.43    0.14 
  -3  -9   9    1.17    0.38 
  -2  -9   9    0.97    0.23 
  -1  -9   9    2.65    0.36 
   0  -9   9    0.92    0.31 
   1  -9   9   16.58    1.10 
   2  -9   9   26.58    1.49 
   3  -9   9    0.13    0.25 
   4  -9   9    2.66    0.37 
   5  -9   9    1.30    0.28 
   6  -9   9    7.12    0.55 
   7  -9   9   16.26    0.99 
   8  -9   9   11.29    0.74 
   9  -9   9    0.57    0.37 
  10  -9   9   12.17    0.90 
  11  -9   9   11.86    0.92 
  12  -9   9    2.73    0.29 
  13  -9   9    2.64    0.24 
  14  -9   9    0.17    0.15 
  15  -9   9    0.19    0.10 
  -4  -8   9   23.43    2.00 
  -3  -8   9   14.75    1.27 
  -2  -8   9    1.06    0.24 
  -1  -8   9   10.06    0.89 
   0  -8   9   29.58    1.65 
   1  -8   9    3.03    0.37 
   2  -8   9    2.12    0.34 
   3  -8   9    3.52    0.38 
   4  -8   9    0.07    0.20 
   5  -8   9    6.86    0.51 
   6  -8   9    7.83    0.53 
   7  -8   9    4.58    0.45 
   8  -8   9   31.95    1.59 
   9  -8   9   18.82    1.03 
  10  -8   9    1.44    0.32 
  11  -8   9   11.23    0.59 
  12  -8   9    1.50    0.21 
  13  -8   9    0.39    0.14 
  14  -8   9    0.41    0.17 
  15  -8   9    0.12    0.10 
  -5  -7   9    7.55    0.80 
  -4  -7   9    1.54    0.46 
  -3  -7   9   11.44    1.26 
  -2  -7   9   18.59    1.26 
  -1  -7   9    5.86    0.48 
   0  -7   9    8.89    0.70 
   1  -7   9   21.41    1.10 
   2  -7   9    2.25    0.29 
   3  -7   9    1.09    0.21 
   4  -7   9    3.04    0.28 
   5  -7   9    3.55    0.31 
   6  -7   9   56.68    2.45 
   7  -7   9   10.81    0.67 
   8  -7   9    2.84    0.27 
   9  -7   9   27.95    1.40 
  10  -7   9   16.99    0.85 
  11  -7   9    0.65    0.20 
  12  -7   9    0.79    0.18 
  13  -7   9    1.75    0.18 
  14  -7   9    0.39    0.17 
  15  -7   9    0.20    0.10 
  -6  -6   9    1.01    0.38 
  -5  -6   9   17.48    1.74 
  -2  -6   9    7.07    0.61 
  -1  -6   9   58.50    2.51 
   0  -6   9    2.79    0.29 
   1  -6   9   88.55    3.81 
   2  -6   9   18.23    0.89 
   3  -6   9    0.53    0.16 
   4  -6   9    3.95    0.33 
   5  -6   9   74.53    2.97 
   6  -6   9    2.33    0.27 
   7  -6   9   23.04    0.87 
   8  -6   9    2.65    0.33 
   9  -6   9    0.43    0.23 
  10  -6   9    5.41    0.35 
  11  -6   9    5.95    0.41 
  12  -6   9    1.86    0.22 
  13  -6   9    6.93    0.39 
  14  -6   9    1.56    0.26 
  15  -6   9    0.80    0.12 
  -6  -5   9    5.30    0.83 
  -1  -5   9   72.70    3.10 
   0  -5   9   14.75    0.73 
   1  -5   9   11.99    0.68 
   2  -5   9   16.01    1.11 
   3  -5   9    6.16    0.36 
   4  -5   9   37.90    1.51 
   5  -5   9   14.23    0.68 
   6  -5   9   97.10    3.77 
   7  -5   9    2.63    0.26 
   8  -5   9    3.57    0.34 
   9  -5   9    2.43    0.32 
  10  -5   9    1.25    0.19 
  11  -5   9   18.69    0.90 
  12  -5   9    5.46    0.38 
  13  -5   9    1.66    0.19 
  14  -5   9    3.35    0.31 
  -1  -4   9   32.19    2.03 
   0  -4   9  269.26   14.28 
   1  -4   9   35.14    1.95 
   2  -4   9   10.54    0.66 
   3  -4   9    8.91    0.64 
   4  -4   9  296.91   14.22 
   5  -4   9   14.23    0.65 
   6  -4   9   18.17    1.07 
   7  -4   9    1.08    0.18 
   8  -4   9    0.09    0.18 
   9  -4   9    1.31    0.24 
  10  -4   9    3.12    0.27 
  11  -4   9    3.45    0.25 
  12  -4   9   21.42    0.86 
  13  -4   9    0.87    0.12 
  14  -4   9    0.35    0.10 
  -1  -3   9   10.03    0.75 
   0  -3   9    1.88    0.32 
   1  -3   9   75.08    3.95 
   2  -3   9  145.86    7.13 
   3  -3   9    3.55    0.50 
   4  -3   9   34.88    1.88 
   5  -3   9   18.78    1.02 
   6  -3   9    0.28    0.22 
   7  -3   9    2.20    0.23 
   8  -3   9    7.65    0.47 
   9  -3   9    6.79    0.49 
  10  -3   9   12.69    0.55 
  11  -3   9   11.18    0.53 
  12  -3   9    1.84    0.15 
  13  -3   9    0.68    0.13 
  14  -3   9    2.31    0.17 
  -1  -2   9  135.72   11.27 
   0  -2   9   94.81    4.79 
   1  -2   9    0.58    0.17 
   2  -2   9   94.16    4.77 
   3  -2   9   80.02    3.92 
   4  -2   9    9.14    0.56 
   5  -2   9    6.44    0.45 
   6  -2   9    5.35    0.44 
   7  -2   9    4.04    0.29 
   8  -2   9    7.62    0.47 
   9  -2   9   17.45    0.92 
  10  -2   9    1.26    0.16 
  11  -2   9    1.22    0.15 
  12  -2   9    1.34    0.17 
  13  -2   9    0.47    0.11 
  14  -2   9   -0.01    0.10 
  -1  -1   9    0.24    0.25 
   0  -1   9    3.00    0.42 
   1  -1   9    3.65    0.25 
   2  -1   9    0.53    0.13 
   3  -1   9  136.17    7.10 
   4  -1   9   10.05    0.58 
   5  -1   9   36.52    1.87 
   6  -1   9   74.19    3.70 
   7  -1   9   59.98    2.73 
   8  -1   9    4.26    0.49 
   9  -1   9   12.27    0.66 
  10  -1   9    2.69    0.25 
  11  -1   9    0.30    0.16 
  12  -1   9    0.88    0.23 
  13  -1   9    0.23    0.15 
  -1   0   9    3.53    0.39 
   0   0   9    0.01    0.16 
   1   0   9    3.04    0.23 
   2   0   9   94.32    4.75 
   3   0   9    3.17    0.30 
   4   0   9  291.06   14.18 
   5   0   9   16.03    0.86 
   6   0   9    2.49    0.23 
   7   0   9   11.06    0.60 
   8   0   9   31.43    1.50 
  10   0   9    0.48    0.29 
  11   0   9    1.72    0.30 
  12   0   9    0.10    0.18 
  13   0   9    0.47    0.14 
  -1   1   9    3.34    0.35 
   0   1   9    3.15    0.35 
   1   1   9    0.40    0.11 
   2   1   9   77.16    3.90 
   3   1   9   35.98    1.86 
   4   1   9   15.08    0.80 
   5   1   9   94.34    4.72 
   6   1   9   23.41    0.98 
   7   1   9    1.90    0.46 
   8   1   9   18.29    1.44 
  10   1   9    4.52    0.56 
  11   1   9    0.74    0.24 
  12   1   9    2.68    0.30 
  -1   2   9    0.56    0.15 
   0   2   9   93.03    4.74 
   1   2   9  138.06    7.08 
   2   2   9    8.47    0.54 
   3   2   9   18.36    0.99 
   4   2   9   19.33    1.04 
   5   2   9    2.10    0.30 
   6   2   9    2.26    0.42 
   7   2   9   27.61    1.96 
  10   2   9    0.65    0.25 
  11   2   9    0.55    0.19 
  12   2   9    0.35    0.12 
  -2   3   9  150.07   11.13 
  -1   3   9   75.60    6.12 
   0   3   9    1.71    0.19 
   1   3   9   10.25    0.56 
   2   3   9    6.05    0.42 
   3   3   9    0.38    0.18 
   4   3   9    1.27    0.24 
   5   3   9    3.86    0.52 
   6   3   9    0.03    0.31 
   9   3   9    3.85    0.47 
  10   3   9    5.44    0.51 
  11   3   9    3.46    0.33 
  -2   4   9    9.46    0.80 
  -1   4   9   37.95    1.84 
   0   4   9  272.98   14.16 
   1   4   9   33.17    1.85 
   2   4   9    5.54    0.38 
   3   4   9    2.23    0.27 
   4   4   9   -0.05    0.27 
   5   4   9    2.61    0.44 
   6   4   9    5.39    0.66 
   9   4   9    2.28    0.37 
  10   4   9    0.42    0.15 
 -12   5   9    5.39    0.44 
  -2   5   9   18.46    1.51 
  -1   5   9   12.97    0.77 
   0   5   9   15.60    0.82 
   1   5   9   71.42    3.67 
   2   5   9    4.50    0.37 
   3   5   9    7.36    0.66 
   4   5   9    1.29    0.35 
   5   5   9    1.13    0.35 
   8   5   9    0.50    0.22 
   9   5   9    0.11    0.16 
 -13   6   9    7.18    0.47 
  -2   6   9   20.08    1.59 
  -1   6   9   94.50    4.69 
   0   6   9    2.53    0.30 
   1   6   9   58.56    3.01 
   2   6   9    6.45    0.67 
   3   6   9    6.95    0.66 
   4   6   9    3.18    0.49 
  -1   7   9   22.94    1.24 
   0   7   9    9.46    0.85 
   1   7   9    5.92    0.57 
   2   7   9   17.11    1.29 
 -14   8   9    0.39    0.13 
  -1   8   9    3.18    0.45 
   0   8   9   30.19    2.15 
   1   8   9    9.83    0.92 
   7 -15  10    0.84    0.15 
   8 -15  10    0.31    0.14 
   5 -14  10    0.42    0.16 
   6 -14  10   -0.06    0.16 
   7 -14  10    9.73    0.72 
   8 -14  10   10.87    0.68 
   9 -14  10    7.69    0.72 
  10 -14  10   17.59    1.09 
  11 -14  10    0.55    0.15 
   4 -13  10    6.28    0.51 
   5 -13  10    0.27    0.21 
   6 -13  10   17.55    1.12 
   7 -13  10    1.05    0.25 
   8 -13  10   35.01    2.20 
   9 -13  10    6.63    0.53 
  10 -13  10    2.35    0.32 
  11 -13  10    0.14    0.16 
  12 -13  10    1.72    0.25 
  13 -13  10    0.41    0.12 
   3 -12  10    0.98    0.24 
   4 -12  10    3.59    0.33 
   5 -12  10    8.74    0.51 
   6 -12  10   14.43    0.74 
   7 -12  10   13.44    0.68 
   8 -12  10    3.51    0.33 
   9 -12  10    1.01    0.19 
  10 -12  10    5.35    0.48 
  11 -12  10   11.70    0.88 
  12 -12  10    1.97    0.29 
   1 -11  10    0.44    0.28 
   2 -11  10    2.61    0.31 
   3 -11  10    2.82    0.29 
   4 -11  10    5.54    0.42 
   5 -11  10    2.68    0.28 
   6 -11  10    3.41    0.35 
   7 -11  10   13.06    0.67 
   8 -11  10    1.52    0.21 
   9 -11  10   11.33    0.65 
  10 -11  10    8.37    0.68 
  11 -11  10    9.14    0.71 
  12 -11  10    9.71    0.71 
   0 -10  10    0.95    0.31 
   1 -10  10    0.58    0.19 
   2 -10  10   33.05    1.59 
   3 -10  10    2.32    0.40 
   4 -10  10   30.85    2.21 
   5 -10  10    0.67    0.31 
   6 -10  10   25.72    1.94 
   7 -10  10    3.02    0.52 
   8 -10  10    0.84    0.19 
   9 -10  10    0.98    0.20 
  10 -10  10    1.23    0.25 
  11 -10  10    0.79    0.22 
  14 -10  10    0.98    0.16 
  -2  -9  10   10.89    1.19 
  -1  -9  10    0.60    0.23 
   0  -9  10   30.84    2.18 
   1  -9  10   68.02    3.30 
   2  -9  10   17.27    1.22 
   3  -9  10   36.79    1.98 
   4  -9  10   17.89    1.14 
   5  -9  10   35.46    1.88 
   6  -9  10    1.13    0.29 
   7  -9  10    1.33    0.31 
   8  -9  10    2.88    0.42 
  11  -9  10    2.60    0.41 
  12  -9  10    0.89    0.18 
  13  -9  10    6.02    0.36 
  14  -9  10    0.38    0.15 
  -3  -8  10    0.80    0.39 
  -2  -8  10    0.67    0.38 
  -1  -8  10    3.97    0.48 
   0  -8  10    3.53    0.45 
   1  -8  10  119.28    6.10 
   2  -8  10   30.41    1.59 
   3  -8  10    1.58    0.27 
   4  -8  10    7.12    0.55 
   5  -8  10   18.92    1.08 
   6  -8  10   67.89    3.35 
   7  -8  10   64.45    3.14 
   8  -8  10    5.44    0.50 
   9  -8  10   67.48    3.18 
  10  -8  10   32.25    2.22 
  11  -8  10    2.49    0.26 
  12  -8  10    3.62    0.32 
  13  -8  10    0.28    0.14 
  14  -8  10    0.05    0.15 
  15  -8  10    1.19    0.17 
  -4  -7  10   12.79    1.25 
  -3  -7  10    3.44    0.66 
  -1  -7  10   64.55    4.34 
   0  -7  10   69.41    3.19 
   1  -7  10    7.92    0.66 
   2  -7  10   30.99    1.49 
   3  -7  10   25.39    1.26 
   4  -7  10    0.45    0.19 
   5  -7  10   51.79    2.26 
   6  -7  10   11.80    0.71 
   7  -7  10   62.66    3.12 
   8  -7  10  129.42    5.96 
   9  -7  10   24.61    1.32 
  10  -7  10    2.89    0.48 
  11  -7  10    5.25    0.39 
  12  -7  10    8.85    0.48 
  13  -7  10   16.39    0.76 
  14  -7  10   10.53    0.67 
  15  -7  10    0.99    0.16 
  -5  -6  10    4.77    0.70 
  -4  -6  10   30.42    2.49 
   0  -6  10  143.70    6.10 
   1  -6  10    5.91    0.37 
   2  -6  10    4.92    0.35 
   3  -6  10   25.83    1.13 
   4  -6  10   43.32    1.81 
   5  -6  10    1.63    0.22 
   6  -6  10  149.21    6.01 
   7  -6  10   10.50    0.48 
   8  -6  10   30.89    1.49 
   9  -6  10   39.80    1.88 
  10  -6  10   31.94    1.47 
  11  -6  10    1.77    0.22 
  12  -6  10   13.84    0.70 
  13  -6  10    1.56    0.18 
  14  -6  10   10.95    0.63 
  -5  -5  10    1.61    0.43 
  -1  -5  10    1.39    0.75 
   0  -5  10  248.14   13.82 
   1  -5  10   21.26    0.93 
   2  -5  10    6.47    0.38 
   3  -5  10  119.22    4.79 
   4  -5  10   29.89    1.33 
   5  -5  10  276.67   10.91 
   6  -5  10    4.44    0.35 
   7  -5  10   34.47    1.42 
   8  -5  10    1.95    0.25 
   9  -5  10   21.10    1.07 
  10  -5  10    1.08    0.21 
  11  -5  10    3.05    0.32 
  12  -5  10   14.13    0.64 
  13  -5  10   32.56    1.51 
  -6  -4  10   32.50    2.81 
  -1  -4  10   29.49    2.87 
   0  -4  10    6.23    0.67 
   1  -4  10    2.07    0.36 
   2  -4  10    5.80    0.54 
   3  -4  10  104.35    5.26 
   4  -4  10    7.98    0.41 
   5  -4  10   20.27    0.89 
   6  -4  10    5.10    0.46 
   7  -4  10   29.19    1.19 
   8  -4  10    8.09    0.50 
   9  -4  10   38.84    1.79 
  10  -4  10   27.35    1.29 
  11  -4  10   12.03    0.53 
  12  -4  10    3.35    0.25 
  13  -4  10    6.48    0.29 
  14  -4  10   14.89    0.74 
  -1  -3  10   98.34    8.37 
   0  -3  10  118.82    6.20 
   1  -3  10  212.89   10.62 
   2  -3  10   38.12    2.02 
   3  -3  10  123.27    6.16 
   4  -3  10    1.83    0.26 
   5  -3  10    6.08    0.46 
   6  -3  10   24.71    1.39 
   7  -3  10    0.44    0.16 
   8  -3  10   20.57    1.03 
   9  -3  10    1.50    0.26 
  10  -3  10    2.61    0.23 
  11  -3  10    2.06    0.18 
  12  -3  10    0.93    0.13 
  13  -3  10    2.50    0.22 
  14  -3  10    0.35    0.08 
  -1  -2  10   40.57    3.24 
   0  -2  10    1.62    0.25 
   1  -2  10   82.83    4.26 
   2  -2  10    1.54    0.21 
   3  -2  10  207.83   10.58 
   4  -2  10    7.42    0.47 
   5  -2  10  117.66    6.00 
   6  -2  10   45.60    2.26 
   7  -2  10   55.68    2.20 
   8  -2  10   71.80    3.26 
   9  -2  10    2.23    0.27 
  10  -2  10    0.74    0.16 
  11  -2  10   12.46    0.51 
  12  -2  10    5.27    0.35 
  13  -2  10    0.09    0.10 
  -1  -1  10   85.24    6.73 
   0  -1  10   62.18    4.89 
   1  -1  10   58.18    3.09 
   2  -1  10   83.11    4.25 
   3  -1  10   38.36    1.98 
   4  -1  10  102.75    5.21 
   5  -1  10   32.08    1.66 
   6  -1  10    2.05    0.21 
   7  -1  10   12.91    0.65 
   8  -1  10   66.61    3.05 
   9  -1  10    2.94    0.27 
  10  -1  10    1.22    0.16 
  11  -1  10    9.99    0.50 
  12  -1  10   14.06    0.94 
  13  -1  10    2.08    0.26 
  -1   0  10   62.37    4.86 
   0   0  10   10.95    1.00 
   1   0  10   58.90    3.08 
   2   0  10    1.46    0.18 
   3   0  10  120.12    6.13 
   4   0  10    8.11    0.50 
   5   0  10  284.05   13.70 
   6   0  10  152.70    5.90 
   7   0  10   64.88    3.03 
   8   0  10    4.94    0.66 
   9   0  10   32.35    1.98 
  10   0  10    1.27    0.33 
  11   0  10    9.76    0.77 
  12   0  10    2.01    0.33 
  13   0  10    0.30    0.12 
  -1   1  10   61.95    4.84 
   0   1  10   61.28    4.85 
   1   1  10   80.96    4.23 
   2   1  10  202.47   10.56 
   3   1  10    2.39    0.27 
   4   1  10   18.85    1.10 
   5   1  10    4.62    0.42 
   6   1  10   12.58    0.59 
   7   1  10  132.24    8.49 
   8   1  10   65.35    4.51 
  10   1  10    0.85    0.30 
  11   1  10   12.29    0.78 
  12   1  10    6.38    0.47 
  -1   2  10   84.87    6.65 
   0   2  10    1.21    0.15 
   1   2  10   38.05    1.96 
   2   2  10    7.20    0.44 
   3   2  10    5.85    0.42 
   4   2  10    4.79    0.40 
   5   2  10   34.40    1.79 
   6   2  10   29.34    2.12 
   7   2  10   22.58    1.62 
  10   2  10    1.23    0.27 
  11   2  10    2.00    0.31 
  -1   3  10  221.51   16.63 
   0   3  10  120.92    6.11 
   1   3  10  101.03    5.20 
   2   3  10  118.04    5.98 
   3   3  10   25.69    1.36 
   4   3  10   27.66    1.49 
   5   3  10    2.02    0.39 
   6   3  10   37.73    2.65 
   9   3  10    1.21    0.29 
  10   3  10    1.03    0.23 
  11   3  10    0.74    0.14 
 -11   4  10   11.48    0.78 
  -1   4  10    2.34    0.34 
   0   4  10    6.20    0.45 
   1   4  10   32.92    1.63 
   2   4  10   42.60    2.21 
   3   4  10    0.71    0.21 
   4   4  10    8.24    0.72 
   5   4  10   20.89    1.50 
   9   4  10    5.43    0.54 
  10   4  10    1.35    0.23 
 -12   5  10   12.60    0.79 
  -1   5  10   23.17    1.71 
   0   5  10  272.12   13.67 
   1   5  10    1.73    0.24 
   2   5  10   53.39    2.77 
   3   5  10   20.57    1.45 
   4   5  10   35.25    2.52 
   8   5  10    0.52    0.23 
   9   5  10    0.47    0.16 
  -1   6  10    5.95    0.61 
   0   6  10  151.26    7.50 
   1   6  10    8.17    0.69 
   2   6  10   66.39    4.62 
   3   6  10    1.69    0.37 
 -15   7  10    0.56    0.12 
  -1   7  10    8.50    1.00 
   0   7  10   68.67    4.32 
   1   7  10   60.98    4.33 
   2   7  10    0.65    0.31 
 -14   8  10    0.12    0.12 
   0   8  10    3.72    0.59 
   1   8  10    3.29    0.50 
 -14   9  10    0.41    0.12 
   5 -14  11   -0.09    0.13 
   6 -14  11    0.03    0.16 
   7 -14  11    0.87    0.19 
   8 -14  11   18.30    1.27 
   9 -14  11   32.57    1.98 
  10 -14  11    0.50    0.17 
  11 -14  11    1.80    0.23 
   3 -13  11    0.36    0.16 
   4 -13  11    5.29    0.45 
   5 -13  11   12.28    0.85 
   6 -13  11    0.63    0.22 
   7 -13  11   20.14    1.27 
   8 -13  11    1.20    0.25 
   9 -13  11   13.98    0.91 
  10 -13  11    2.67    0.32 
  11 -13  11    0.41    0.16 
  12 -13  11    2.17    0.25 
   2 -12  11    0.09    0.20 
   3 -12  11    3.50    0.40 
   4 -12  11    0.97    0.20 
   5 -12  11   13.05    0.68 
   6 -12  11    2.70    0.30 
   7 -12  11   14.76    0.75 
   8 -12  11    9.29    0.51 
   9 -12  11    3.71    0.40 
  10 -12  11    1.74    0.26 
  11 -12  11    1.05    0.20 
  12 -12  11    8.11    0.62 
   2 -11  11    2.05    0.23 
   3 -11  11    8.45    0.48 
   4 -11  11    2.13    0.26 
   5 -11  11    1.22    0.21 
   6 -11  11    2.73    0.32 
   7 -11  11    1.17    0.21
[truncated: 1,205,380 more chars]
